# Supplementary material for: Transcriptome and Metabolome Analyses Provide Insight into the Glucose-Induced Adipogenesis in Porcine Adipocytes
Source: MDPI journal article supplement (doi:10.3390/cimb46030131), 2024-03-03
Supplement: s1 [file s1]

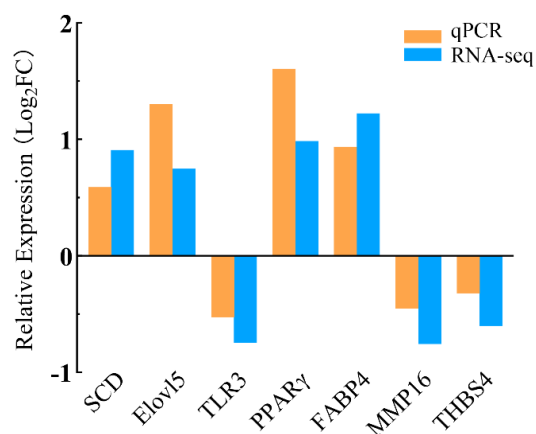

**Figure S1.** Validation of seven randomly selected DEGs by RT-qPCR.

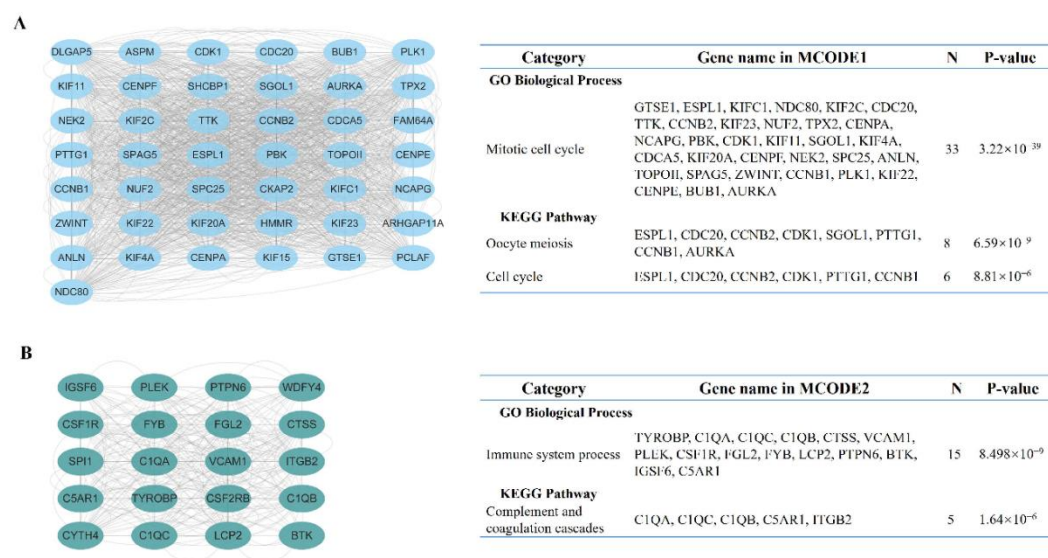

**Figure S2.** Function and pathway enrichment analyses of Module 1 (A) and Module 2 (B).

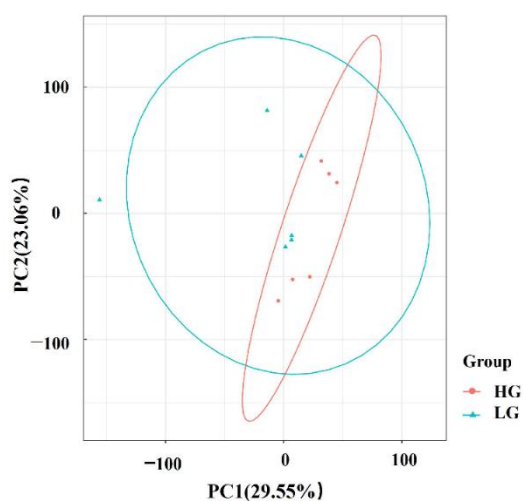

**Figure S3.** Principal component analysis (PCA) of the metabolite profiles for LG and HG groups
