# Supplementary material for: Transcriptome and Metabolome Analyses Provide Insight into the Glucose-Induced Adipogenesis in Porcine Adipocytes
Source: MDPI journal article supplement (doi:10.3390/cimb46030131), 2024-03-03
Supplement: s1 [file s1]

Table S2. Output statistics of sequencing data

| Samples | Clean reads | Clean bases   | GC content (%) | Q30 (%) | Mapped Reads        | Uniq Mapped Reads   |
|---------|-------------|---------------|----------------|---------|---------------------|---------------------|
| LG1     | 26,178,107  | 7,833,355,028 | 52.93%         | 95.01%  | 50,328,338 (96.13%) | 48,858,519 (93.32%) |
| LG2     | 26,872,283  | 8,035,194,410 | 52.81%         | 94.96%  | 51,776,330 (96.34%) | 50,360,805 (93.70%) |
| LG3     | 26,258,631  | 7,856,750,622 | 52.63%         | 94.91%  | 50,510,536 (96.18%) | 49,063,069 (93.42%) |
| LG4     | 23,809,411  | 7,125,046,442 | 52.82%         | 95.02%  | 45,693,418 (95.96%) | 44,463,527 (93.37%) |
| HG1     | 25,138,045  | 7,521,646,898 | 52.69%         | 95.01%  | 48,347,927 (96.16%) | 47,074,542 (93.63%) |
| HG2     | 23,400,493  | 7,002,757,020 | 52.72%         | 94.92%  | 45,241,448 (96.67%) | 44,094,965 (94.22%) |
| HG3     | 24,369,010  | 7,294,670,124 | 52.78%         | 95.26%  | 47,288,422 (97.03%) | 46,127,705 (94.64%) |
| HG4     | 24,700,404  | 7,383,674,688 | 53.05%         | 94.96%  | 47,428,976 (96.01%) | 45,992,578 (93.10%) |
