# Supplementary material for: Transcriptome and Metabolome Analyses Provide Insight into the Glucose-Induced Adipogenesis in Porcine Adipocytes
Source: MDPI journal article supplement (doi:10.3390/cimb46030131), 2024-03-03
Supplement: s1 [file s1]

**Table S1** Primers used for experimental validation by qRT-PCR analysis

| Gene name <sup>1</sup> | Accession number | Primer    |                         | Size(bp) |
|------------------------|------------------|-----------|-------------------------|----------|
|                        |                  | Direction | Sequence (5' to 3')     |          |
| MMP16                  | XM_001926617.6   | F         | CAGAAAGTGGCAGCACAAAC    | 241      |
|                        |                  | R         | ATCCTCCCTCTCCATCAAA     |          |
| SCD                    | XM_021072070     | F         | TGCTGATCCCCACAATTCCC    | 352      |
|                        |                  | R         | CTCCCGGGGGCTAATAGTCT    |          |
| Elov15                 | XM_021098832     | F         | TGTGAGTTGTGCCCAATGCT    | 166      |
|                        |                  | R         | CTGATGGAAGAGGTCCTACGG   |          |
| FABP4                  | NM_001002817     | F         | GACAGGAAAGTCAAGAGCACC   | 228      |
|                        |                  | R         | CGGGACAATACATCCAACAGAGT |          |
| TLR3                   | NM_001097444.1   | F         | ACAAAACCAGCAACACGAC     | 187      |
|                        |                  | R         | TTGGAAAGCCCATAAAGAG     |          |
| PPAR $\gamma$          | NM_214379.1      | F         | TTATTGACCCAGAAAGCG      | 88       |
|                        |                  | R         | AGGATTTTCATACCGCAGG     |          |
| THBS4                  | XM_021084490.1   | F         | TTGTGACGAGGATGCTGAT     | 259      |
|                        |                  | R         | GTCTTGCTGGTTACGATTG     |          |
| $\beta$ -actin         | XM_003124280     | F         | GATCGTGCGGGACATCAA      | 180      |
|                        |                  | R         | AGGAAGGAGGGCTGGAAGAG    |          |

<sup>1</sup>MMP16, matrix metalloproteinase 16; SCD, stearoyl-CoA desaturase; Elov15, fatty acid elongase-5; FABP4, fatty acid-binding protein 4; TLR3, toll like receptor 3; PPAR $\gamma$ , peroxisome proliferator-activated receptor gamma; THBS4, thrombospondin-4.
