# Supplementary material for: Transcriptome and Metabolome Analyses Provide Insight into the Glucose-Induced Adipogenesis in Porcine Adipocytes
Source: Curr Issues Mol Biol. 2024 Mar 3;46(3):2027–42. doi: 10.3390/cimb46030131 (PMC10968871; doi:10.3390/cimb46030131)
Supplement: Supplementary file 1 [file cimb-46-00131-s001.zip]

Archive with 9 entries (9 files):
- FigureS1-S3.pdf
- Table S1. Primers used for experimtal validation by qRT-PCR analysis.pdf
- Table S2. Output statistics of sequencing data.pdf
- Table S3. Summary of DEGs between LG and HG groups.xlsx
- Table S4. Overview of significant enriched GO terms.xlsx
- Table S5. KEGG enrichment analysis of DEGs between LG and HG groups.xlsx
- Table S6. Identification of the differential metabolites between LG and HG groups.xlsx
- Table S7.  KEGG annotated results of differential metabolites.xlsx
- Table S8. The differential metabolites and genes related top 20 of the enriched KEGG pathways.xlsx
