# Supplementary material for: Transcriptome and Metabolome Analyses Provide Insight into the Glucose-Induced Adipogenesis in Porcine Adipocytes
Source: Curr Issues Mol Biol. 2024 Mar 3;46(3):2027–42. doi: 10.3390/cimb46030131 (PMC10968871; doi:10.3390/cimb46030131)
Supplement: Supplementary file 1 [file cimb-46-00131-s001.zip › Table S3. Summary of DEGs between LG and HG groups.xlsx]

## Sheet: All annotation
Table S3. Summary of DEGs between LG and HG groups
Gene_ID	gene_name	HG1_FPKM	HG1_count	HG2_FPKM	HG2_count	HG3_FPKM	HG3_count	HG4_FPKM	HG4_count	NG1_FPKM	NG1_count	NG2_FPKM	NG2_count	NG3_FPKM	NG3_count	NG4_FPKM	NG4_count	Pvalue	log2FC	regulated	COG_class	COG_class_annotation	GO_annotation	KEGG_annotation	KEGG_pathway_annotation	KOG_class	KOG_class_annotation	Pfam_annotation	Swiss_Prot_annotation	eggNOG_class	eggNOG_class_annotation	NR_annotation	GO_second_level_annotation
ENSSSCG00000000002	GTSE1	2.39284	254	2.05107	204	1.75544	184	1.3175	137	4.80606	533	2.76522	317	3.25475	362	1.84173	186	0.00217678	-0.787678	down	--	--	Cellular Component: cytoplasmic microtubule (GO:0005881);;	K10129|0.0e+00|ssc:100520739|K10129 G-2 and S-phase expressed protein 1 | (RefSeq) GTSE1; G2 and S phase-expressed protein 1	p53 signaling pathway (ko04115)	--	--	G-2 and S-phase expressed 1	--	S	Function unknown	G2 and S phase-expressed protein 1 [Sus scrofa]	cellular component: cell (GO:0005623);; cellular component: organelle (GO:0043226);; cellular component: organelle part (GO:0044422);; cellular component: cell part (GO:0044464);; cellular component: supramolecular complex (GO:0099080)
ENSSSCG00000000062	CSDC2	4.77586	573	4.75715	536	4.40585	522	5.23885	614	2.70033	339	2.87551	373	3.07966	388	3.4515	395	6.06282e-06	0.627327	up	--	--	Molecular Function: mRNA 3'-UTR binding (GO:0003730);; Cellular Component: cytoplasm (GO:0005737);; Biological Process: regulation of mRNA stability (GO:0043488);;	K00503|1.5e-25|dpl:KGM_207724|K00503 dopamine beta-monooxygenase [EC:1.14.17.1] | (RefSeq) tyramine beta hydroxylase precursor	Tyrosine metabolism (ko00350)	[J]	Translation, ribosomal structure and biogenesis	'Cold-shock' DNA-binding domain	--	J	Translation, ribosomal structure and biogenesis	cold shock domain-containing protein C2 [Sus scrofa]	molecular function: binding (GO:0005488);; cellular component: cell (GO:0005623);; cellular component: cell part (GO:0044464);; biological process: biological regulation (GO:0065007)
ENSSSCG00000000111	BAIAP2L2	0.819088	77	1.16915	103	0.940833	87	0.62928	58	0.794886	78	0.451865	46	0.426416	42	0.425217	38	0.00949562	0.723033	up	--	--	Molecular Function: phospholipid binding (GO:0005543);; Cellular Component: nucleoplasm (GO:0005654);; Cellular Component: cytosol (GO:0005829);; Biological Process: plasma membrane organization (GO:0007009);; Cellular Component: vesicle membrane (GO:0012506);; Biological Process: positive regulation of actin filament polymerization (GO:0030838);; Cellular Component: cell-cell contact zone (GO:00…	K23645|6.9e-272|ssc:100515261|K23645 BAI1-associated protein 2-like protein 2 | (RefSeq) BAIAP2L2; brain-specific angiogenesis inhibitor 1-associated protein 2-like protein 2	--	--	--	IRSp53/MIM homology domain	Brain-specific angiogenesis inhibitor 1-associated protein 2-like protein 2 OS=Bos taurus OX=9913 GN=BAIAP2L2 PE=3 SV=1	T	Signal transduction mechanisms	brain-specific angiogenesis inhibitor 1-associated protein 2-like protein 2 [Sus scrofa]	molecular function: binding (GO:0005488);; cellular component: cell (GO:0005623);; cellular component: organelle (GO:0043226);; cellular component: organelle part (GO:0044422);; cellular component: cell part (GO:0044464);; biological process: cellular process (GO:0009987);; biological process: single-organism process (GO:0044699);; biological process: cellular component organization or biogenesis…
ENSSSCG00000000130	CYTH4	0.732688	106	0.696139	95	0.433181	62	0.552399	78	0.23145	35	0.261828	41	0.079358	12	0.325883	45	3.29814e-05	1.38596	up	[R]	General function prediction only	Molecular Function: ARF guanyl-nucleotide exchange factor activity (GO:0005086);; Cellular Component: plasma membrane (GO:0005886);; Biological Process: regulation of ARF protein signal transduction (GO:0032012);;	K18441|2.8e-233|ssc:100240722|K18441 cytohesin | (RefSeq) CYTH4; cytohesin-4	Phospholipase D signaling pathway (ko04072);; Endocytosis (ko04144);; Salmonella infection (ko05132)	[U]	Intracellular trafficking, secretion, and vesicular transport	Sec7 domain	Cytohesin-2 OS=Chlorocebus aethiops OX=9534 GN=CYTH2 PE=2 SV=1	T	Signal transduction mechanisms	cytohesin-4 [Sus scrofa]	molecular function: molecular function regulator (GO:0098772);; biological process: biological regulation (GO:0065007);; cellular component: cell (GO:0005623);; cellular component: membrane (GO:0016020);; cellular component: cell part (GO:0044464)
ENSSSCG00000000136	CSF2RB	1.73422	368	1.66031	327	1.42288	294	1.93943	390	0.47521	106	0.607204	137	0.953385	213	1.00202	132	6.61176e-09	1.27338	up	--	--	Molecular Function: cytokine receptor activity (GO:0004896);; Cellular Component: integral component of membrane (GO:0016021);;	K04738|0.0e+00|ssc:100153254|K04738 cytokine receptor common subunit beta | (RefSeq) CSF2RB; cytokine receptor common subunit beta	Cytokine-cytokine receptor interaction (ko04060);; Apoptosis (ko04210);; JAK-STAT signaling pathway (ko04630);; Pathways in cancer (ko05200)	--	--	Interleukin-6 receptor alpha chain, binding	--	T	Signal transduction mechanisms	cytokine receptor common subunit beta [Sus scrofa]	molecular function: signal transducer activity (GO:0004871);; molecular function: molecular transducer activity (GO:0060089);; biological process: cellular process (GO:0009987);; biological process: signaling (GO:0023052);; biological process: single-organism process (GO:0044699);; biological process: response to stimulus (GO:0050896);; biological process: biological regulation (GO:0065007);; cel…
ENSSSCG00000000137	NCF4	1.08328	124	1.0302	131	0.534002	90	0.717407	123	0.244658	45	0.343535	67	0.363206	67	0.282471	48	4.96911e-06	1.0897	up	--	--	Biological Process: phagocytosis (GO:0006909);; Molecular Function: superoxide-generating NADPH oxidase activator activity (GO:0016176);; Molecular Function: phosphatidylinositol binding (GO:0035091);; Cellular Component: NADPH oxidase complex (GO:0043020);; Biological Process: respiratory burst (GO:0045730);;	K08012|7.0e-193|ssc:100152055|K08012 neutrophil cytosolic factor 4 | (RefSeq) NCF4; neutrophil cytosol factor 4 isoform X3	Phagosome (ko04145);; Osteoclast differentiation (ko04380);; Leukocyte transendothelial migration (ko04670);; Prion disease (ko05020);; Leishmaniasis (ko05140)	[C]	Energy production and conversion	PB1 domain	Dynamin-binding protein OS=Canis lupus familiaris OX=9615 GN=DNMBP PE=3 SV=2	T	Signal transduction mechanisms	neutrophil cytosol factor 4 isoform X3 [Sus scrofa]	biological process: single-organism process (GO:0044699);; biological process: localization (GO:0051179);; molecular function: molecular function regulator (GO:0098772);; biological process: biological regulation (GO:0065007);; molecular function: binding (GO:0005488);; cellular component: cell (GO:0005623);; cellular component: membrane (GO:0016020);; cellular component: macromolecular complex (…
ENSSSCG00000000146	MYH11	8.67147	2597	8.66587	2399	10.6213	3140	9.29456	2716	10.8138	3348	17.0637	5430	17.5649	5456	23.6359	6725	5.92489e-08	-0.919273	down	--	--	Molecular Function: motor activity (GO:0003774);; Molecular Function: ATP binding (GO:0005524);; Cellular Component: myosin complex (GO:0016459);; Molecular Function: actin filament binding (GO:0051015);;	K10352|0.0e+00|ssc:100627924|K10352 myosin heavy chain 9/10/11/14 | (RefSeq) MYH11; LOW QUALITY PROTEIN: myosin-11	Vascular smooth muscle contraction (ko04270);; Tight junction (ko04530);; Regulation of actin cytoskeleton (ko04810)	[Z]	Cytoskeleton	Myosin tail	Myosin-11 OS=Oryctolagus cuniculus OX=9986 GN=MYH11 PE=2 SV=2	Z	Cytoskeleton	PREDICTED: myosin-11 isoform X1 [Elephantulus edwardii]	molecular function: catalytic activity (GO:0003824);; molecular function: binding (GO:0005488);; cellular component: cell (GO:0005623);; cellular component: macromolecular complex (GO:0032991);; cellular component: organelle (GO:0043226);; cellular component: organelle part (GO:0044422);; cellular component: cell part (GO:0044464)
ENSSSCG00000000151	ENSSSCG00000000151	3.9887	356	3.56822	299	4.32336	380	3.55448	310	1.73723	162	1.97197	190	1.83625	172	2.33852	199	1.27372e-07	0.933073	up	--	--	Cellular Component: extracellular region (GO:0005576);; Biological Process: lipid transport (GO:0006869);; Molecular Function: lipid binding (GO:0008289);; Biological Process: lipoprotein metabolic process (GO:0042157);;	K14480|3.8e-175|ssc:100518305|K14480 apolipoprotein L | (RefSeq) LOW QUALITY PROTEIN: apolipoprotein L6	--	--	--	Apolipoprotein L	--	S	Function unknown	LOW QUALITY PROTEIN: apolipoprotein L6 [Sus scrofa]	cellular component: extracellular region (GO:0005576);; biological process: single-organism process (GO:0044699);; biological process: localization (GO:0051179);; molecular function: binding (GO:0005488);; biological process: metabolic process (GO:0008152)
ENSSSCG00000000259	CSAD	4.10416	490	4.21429	479	3.90029	464	3.13196	371	2.32028	292	1.86124	239	2.70497	347	2.43485	279	2.36847e-05	0.681566	up	[E]	Amino acid transport and metabolism	Molecular Function: carboxy-lyase activity (GO:0016831);; Biological Process: carboxylic acid metabolic process (GO:0019752);; Molecular Function: pyridoxal phosphate binding (GO:0030170);;	K01594|6.7e-293|ssc:100515377|K01594 sulfinoalanine decarboxylase [EC:4.1.1.29] | (RefSeq) CSAD; cysteine sulfinic acid decarboxylase isoform X6	Taurine and hypotaurine metabolism (ko00430)	[E]	Amino acid transport and metabolism	Pyridoxal-dependent decarboxylase conserved domain	Acidic amino acid decarboxylase GADL1 OS=Bos taurus OX=9913 GN=GADL1 PE=2 SV=2	E	Amino acid transport and metabolism	cysteine sulfinic acid decarboxylase isoform X6 [Sus scrofa]	molecular function: catalytic activity (GO:0003824);; biological process: metabolic process (GO:0008152);; biological process: cellular process (GO:0009987);; biological process: single-organism process (GO:0044699);; molecular function: binding (GO:0005488)
ENSSSCG00000000261	ENSSSCG00000000261	5.6411	443	6.37014	494	3.68488	302	4.76925	374	10.9793	945	7.21899	641	6.18072	533	6.12461	446	0.00235267	-0.613559	down	--	--	Molecular Function: insulin-like growth factor binding (GO:0005520);; Cellular Component: extracellular region (GO:0005576);;	K23579|7.5e-109|biu:109559052|K23579 insulin-like growth factor-binding protein 6 | (RefSeq) IGFBP6; insulin-like growth factor-binding protein 6 isoform X1	--	--	--	--	Insulin-like growth factor-binding protein 6 OS=Bos taurus OX=9913 GN=IGFBP6 PE=2 SV=2	T	Signal transduction mechanisms	insulin-like growth factor-binding protein 6 isoform X1 [Bos taurus]	molecular function: binding (GO:0005488);; cellular component: extracellular region (GO:0005576)
ENSSSCG00000000265	ESPL1	1.00054	285	1.08257	292	1.24442	359	1.10168	312	2.50028	751	1.63839	509	1.58615	478	1.07871	302	0.00162199	-0.646981	down	--	--	Biological Process: mitotic sister chromatid segregation (GO:0000070);; Biological Process: meiotic spindle organization (GO:0000212);; Molecular Function: cysteine-type endopeptidase activity (GO:0004197);; Cellular Component: nucleus (GO:0005634);; Cellular Component: cytoplasm (GO:0005737);; Cellular Component: centrosome (GO:0005813);; Biological Process: homologous chromosome segregation (GO…	K02365|0.0e+00|ssc:100153121|K02365 separase [EC:3.4.22.49] | (RefSeq) ESPL1; LOW QUALITY PROTEIN: separin	Cell cycle (ko04110);; Oocyte meiosis (ko04114);; Human T-cell leukemia virus 1 infection (ko05166)	[D]	Cell cycle control, cell division, chromosome partitioning	Peptidase family C50	--	D	Cell cycle control, cell division, chromosome partitioning	LOW QUALITY PROTEIN: separin [Sus scrofa]	biological process: cellular process (GO:0009987);; biological process: single-organism process (GO:0044699);; biological process: cellular component organization or biogenesis (GO:0071840);; biological process: reproduction (GO:0000003);; biological process: reproductive process (GO:0022414);; molecular function: catalytic activity (GO:0003824);; biological process: metabolic process (GO:0008152…
ENSSSCG00000000295	NCKAP1L	1.74643	469	2.34439	572	1.39959	373	1.65788	492	0.435181	133	0.717582	169	0.888315	209	0.95148	200	2.52314e-13	1.4608	up	--	--	--	K05750|0.0e+00|ssc:102162203|K05750 NCK-associated protein 1 | (RefSeq) NCKAP1L; nck-associated protein 1-like	Regulation of actin cytoskeleton (ko04810);; Salmonella infection (ko05132)	[R]	General function prediction only	Membrane-associated apoptosis protein	--	S	Function unknown	nck-associated protein 1-like [Sus scrofa]	--
ENSSSCG00000000298	PPP1R1A	24.7086	1103	22.2794	1108	22.8782	1275	20.3781	1031	11.9066	558	7.21084	406	9.31869	434	13.1627	647	2.29369e-13	1.17557	up	--	--	Molecular Function: protein phosphatase inhibitor activity (GO:0004864);; Biological Process: signal transduction (GO:0007165);;	K08050|2.8e-68|oro:101378762|K08050 protein phosphatase 1 regulatory subunit 1A | (RefSeq) PPP1R1A; protein phosphatase 1 regulatory subunit 1A isoform X3	Adrenergic signaling in cardiomyocytes (ko04261);; Long-term potentiation (ko04720)	--	--	Protein phosphatase inhibitor 1/DARPP-32	Protein phosphatase 1 regulatory subunit 1A OS=Oryctolagus cuniculus OX=9986 GN=PPP1R1A PE=1 SV=1	S	Function unknown	PREDICTED: protein phosphatase 1 regulatory subunit 1A isoform X3 [Odobenus rosmarus divergens]	molecular function: molecular function regulator (GO:0098772);; biological process: biological regulation (GO:0065007);; biological process: cellular process (GO:0009987)
ENSSSCG00000000362	RDH5	4.69069	301	4.6783	282	5.50153	348	4.16898	262	1.46146	99	1.5651	109	1.56753	106	2.11339	130	7.55089e-14	1.46167	up	[IQR]	Lipid transport and metabolism;; Secondary metabolites biosynthesis, transport and catabolism;; General function prediction only	Biological Process: retinoid metabolic process (GO:0001523);; Molecular Function: retinol dehydrogenase activity (GO:0004745);; Cellular Component: endoplasmic reticulum lumen (GO:0005788);; Cellular Component: endoplasmic reticulum membrane (GO:0005789);; Biological Process: steroid metabolic process (GO:0008202);; Molecular Function: protein homodimerization activity (GO:0042803);; Molecular Fu…	K00061|1.6e-181|ssc:100517586|K00061 11-cis-retinol dehydrogenase [EC:1.1.1.315] | (RefSeq) RDH5; 11-cis retinol dehydrogenase	Retinol metabolism (ko00830)	[QR]	Secondary metabolites biosynthesis, transport and catabolism;; General function prediction only	short chain dehydrogenase	Retinol dehydrogenase 5 OS=Bos taurus OX=9913 GN=RDH5 PE=1 SV=1	Q	Secondary metabolites biosynthesis, transport and catabolism	11-cis retinol dehydrogenase [Sus scrofa]	biological process: metabolic process (GO:0008152);; biological process: cellular process (GO:0009987);; biological process: single-organism process (GO:0044699);; molecular function: catalytic activity (GO:0003824);; cellular component: cell (GO:0005623);; cellular component: membrane-enclosed lumen (GO:0031974);; cellular component: organelle (GO:0043226);; cellular component: organelle part (G…
ENSSSCG00000000419	RDH16	5.07688	1035	5.11886	976	4.2736	831	5.11436	932	2.73963	586	2.99945	621	2.6736	578	3.43682	619	8.93238e-10	0.691175	up	[IQR]	Lipid transport and metabolism;; Secondary metabolites biosynthesis, transport and catabolism;; General function prediction only	Molecular Function: retinol dehydrogenase activity (GO:0004745);; Biological Process: steroid metabolic process (GO:0008202);; Cellular Component: intracellular membrane-bounded organelle (GO:0043231);; Molecular Function: androsterone dehydrogenase activity (GO:0047023);; Molecular Function: androstan-3-alpha,17-beta-diol dehydrogenase activity (GO:0047044);;	K11154|1.0e-182|ssc:100512656|K11154 retinol dehydrogenase 16 [EC:1.1.1.-] | (RefSeq) retinol dehydrogenase 16 isoform X1	Retinol metabolism (ko00830)	[QR]	Secondary metabolites biosynthesis, transport and catabolism;; General function prediction only	short chain dehydrogenase	17-beta-hydroxysteroid dehydrogenase type 6 OS=Bos taurus OX=9913 GN=HSD17B6 PE=2 SV=1	Q	Secondary metabolites biosynthesis, transport and catabolism	retinol dehydrogenase 16 isoform X1 [Sus scrofa]	molecular function: catalytic activity (GO:0003824);; biological process: metabolic process (GO:0008152);; biological process: single-organism process (GO:0044699);; cellular component: cell (GO:0005623);; cellular component: organelle (GO:0043226);; cellular component: cell part (GO:0044464)
ENSSSCG00000000439	KIF5A	0.698724	218	0.922648	272	0.696091	217	0.914811	281	0.452953	148	0.60948	205	0.455872	150	0.340934	89	0.000403822	0.800329	up	--	--	Molecular Function: microtubule motor activity (GO:0003777);; Molecular Function: ATP binding (GO:0005524);; Biological Process: microtubule-based movement (GO:0007018);; Molecular Function: microtubule binding (GO:0008017);;	K10396|0.0e+00|ssc:100519957|K10396 kinesin family member 5 | (RefSeq) KIF5A; kinesin heavy chain isoform X1	Endocytosis (ko04144);; Dopaminergic synapse (ko04728);; Alzheimer disease (ko05010);; Parkinson disease (ko05012);; Amyotrophic lateral sclerosis (ko05014);; Huntington disease (ko05016);; Prion disease (ko05020)	[Z]	Cytoskeleton	Kinesin motor domain	Kinesin heavy chain isoform 5A OS=Pongo abelii OX=9601 GN=KIF5A PE=2 SV=1	Z	Cytoskeleton	kinesin heavy chain isoform X4 [Sus scrofa]	molecular function: catalytic activity (GO:0003824);; molecular function: binding (GO:0005488);; biological process: cellular process (GO:0009987);; biological process: single-organism process (GO:0044699)
ENSSSCG00000000442	INHBE	4.81296	285	9.20044	512	6.3524	371	8.24082	477	14.417	893	14.0725	900	11.2187	697	11.4025	644	1.65081e-06	-0.871415	down	--	--	Molecular Function: cytokine activity (GO:0005125);; Molecular Function: hormone activity (GO:0005179);; Cellular Component: extracellular space (GO:0005615);; Molecular Function: growth factor activity (GO:0008083);; Biological Process: positive regulation of pathway-restricted SMAD protein phosphorylation (GO:0010862);; Biological Process: SMAD protein signal transduction (GO:0060395);;	K22689|4.8e-205|ssc:100518554|K22689 inhibin beta E chain | (RefSeq) INHBE; LOW QUALITY PROTEIN: inhibin beta E chain	Cytokine-cytokine receptor interaction (ko04060);; TGF-beta signaling pathway (ko04350);; Signaling pathways regulating pluripotency of stem cells (ko04550)	[T]	Signal transduction mechanisms	Transforming growth factor beta like domain	Inhibin beta B chain OS=Sus scrofa OX=9823 GN=INHBB PE=1 SV=2	T	Signal transduction mechanisms	LOW QUALITY PROTEIN: inhibin beta E chain [Sus scrofa]	molecular function: binding (GO:0005488);; cellular component: extracellular region (GO:0005576);; cellular component: extracellular region part (GO:0044421);; biological process: biological regulation (GO:0065007);; biological process: cellular process (GO:0009987);; biological process: signaling (GO:0023052);; biological process: single-organism process (GO:0044699);; biological process: respon…
ENSSSCG00000000443	GLI1	3.43799	789	2.35572	508	2.03097	460	2.4967	560	4.19741	1008	4.41443	1095	4.66338	1123	4.03433	883	2.55496e-08	-0.7848	down	--	--	Molecular Function: RNA polymerase II regulatory region sequence-specific DNA binding (GO:0000977);; Cellular Component: nucleus (GO:0005634);; Biological Process: regulation of transcription from RNA polymerase II promoter (GO:0006357);; Biological Process: smoothened signaling pathway (GO:0007224);; Biological Process: pituitary gland development (GO:0021983);;	K16797|0.0e+00|ssc:100520490|K16797 zinc finger protein GLI1 | (RefSeq) GLI1; zinc finger protein GLI1	cAMP signaling pathway (ko04024);; Hedgehog signaling pathway (ko04340);; Pathways in cancer (ko05200);; Basal cell carcinoma (ko05217)	[R]	General function prediction only	Zinc finger, C2H2 type	Transcriptional activator GLI3 OS=Pan troglodytes OX=9598 GN=GLI3 PE=2 SV=1	K	Transcription	zinc finger protein GLI1 isoform X2 [Sus scrofa]	molecular function: binding (GO:0005488);; cellular component: cell (GO:0005623);; cellular component: organelle (GO:0043226);; cellular component: cell part (GO:0044464);; biological process: biological regulation (GO:0065007);; biological process: cellular process (GO:0009987);; biological process: signaling (GO:0023052);; biological process: single-organism process (GO:0044699);; biological pr…
ENSSSCG00000000657	ENSSSCG00000000657	2.31216	147	1.75902	106	1.73626	108	1.51612	95	0.677719	45	1.01239	69	0.448726	31	1.13277	69	6.5348e-05	1.1194	up	--	--	Cellular Component: integral component of membrane (GO:0016021);; Molecular Function: carbohydrate binding (GO:0030246);;	K10072|2.1e-109|ssc:100521013|K10072 C-type lectin domain family 2 member D | (RefSeq) CLEC2D; C-type lectin domain family 2 member D isoform X2	--	[TV]	Signal transduction mechanisms;; Defense mechanisms	Lectin C-type domain	--	--	--	C-type lectin domain family 2 member D isoform X1 [Sus scrofa]	cellular component: membrane (GO:0016020);; cellular component: membrane part (GO:0044425);; molecular function: binding (GO:0005488)
ENSSSCG00000000672	CLSTN3	2.91082	450	2.91134	430	3.37234	551	2.13278	351	1.65657	277	1.29136	227	1.49496	237	1.14829	184	8.6805e-09	0.994644	up	--	--	Molecular Function: calcium ion binding (GO:0005509);; Biological Process: homophilic cell adhesion via plasma membrane adhesion molecules (GO:0007156);; Cellular Component: integral component of membrane (GO:0016021);;	K22661|0.0e+00|ssc:100511695|K22661 calsyntenin 3 | (RefSeq) CLSTN3; calsyntenin-3 isoform X2	--	[W]	Extracellular structures	Cadherin domain	Calsyntenin-3 OS=Bos taurus OX=9913 GN=CLSTN3 PE=2 SV=2	W	Extracellular structures	calsyntenin-3 isoform X2 [Sus scrofa]	molecular function: binding (GO:0005488);; biological process: biological adhesion (GO:0022610);; cellular component: membrane (GO:0016020);; cellular component: membrane part (GO:0044425)
ENSSSCG00000000703	ENSSSCG00000000703	1.03393	155	0.597129	110	1.03585	159	0.466608	114	0.183319	48	0.523368	81	0.440562	89	0.477142	66	7.98174e-05	0.961264	up	--	--	Cellular Component: integral component of membrane (GO:0016021);; Biological Process: vesicle-mediated transport (GO:0016192);;	K08510|5.3e-40|tmu:101350346|K08510 vesicle-associated membrane protein 1 | (RefSeq) vesicle-associated membrane protein 1 isoform X1	SNARE interactions in vesicular transport (ko04130)	[U]	Intracellular trafficking, secretion, and vesicular transport	Synaptobrevin	Vesicle-associated membrane protein 1 OS=Bos taurus OX=9913 GN=VAMP1 PE=3 SV=2	U	Intracellular trafficking, secretion, and vesicular transport	vesicle-associated membrane protein 1 isoform X1 [Trichechus manatus latirostris]	cellular component: membrane (GO:0016020);; cellular component: membrane part (GO:0044425);; biological process: localization (GO:0051179)
ENSSSCG00000000709	PLEKHG6	1.26338	155	0.961115	112	0.867002	103	1.08677	131	0.792351	102	0.749785	102	0.508801	65	0.449013	58	0.00499433	0.665458	up	--	--	Molecular Function: guanyl-nucleotide exchange factor activity (GO:0005085);; Molecular Function: GTPase activator activity (GO:0005096);;	K19464|9.1e-113|oaa:100088734|K19464 pleckstrin homology domain-containing family G member 5 | (RefSeq) PLEKHG5; pleckstrin homology domain-containing family G member 5 isoform X1	Pathways in cancer (ko05200)	[T]	Signal transduction mechanisms	RhoGEF domain	Proto-oncogene vav OS=Bos taurus OX=9913 GN=VAV1 PE=2 SV=1	T	Signal transduction mechanisms	pleckstrin homology domain-containing family G member 6 [Sus scrofa]	molecular function: molecular function regulator (GO:0098772);; biological process: biological regulation (GO:0065007)
ENSSSCG00000000856	PAH	0.355371	79	0.606258	126	0.681373	149	0.370281	80	0.314568	62	0.344343	83	0.226624	49	0.335422	71	0.00648132	0.755913	up	[E]	Amino acid transport and metabolism	Molecular Function: phenylalanine 4-monooxygenase activity (GO:0004505);; Molecular Function: iron ion binding (GO:0005506);; Biological Process: L-phenylalanine catabolic process (GO:0006559);;	K00500|4.2e-262|ssc:100521900|K00500 phenylalanine-4-hydroxylase [EC:1.14.16.1] | (RefSeq) PAH; LOW QUALITY PROTEIN: phenylalanine-4-hydroxylase	Phenylalanine metabolism (ko00360);; Phenylalanine, tyrosine and tryptophan biosynthesis (ko00400);; Folate biosynthesis (ko00790);; Biosynthesis of amino acids (ko01230)	[E]	Amino acid transport and metabolism	Biopterin-dependent aromatic amino acid hydroxylase	Phenylalanine-4-hydroxylase OS=Bos taurus OX=9913 GN=PAH PE=2 SV=1	E	Amino acid transport and metabolism	LOW QUALITY PROTEIN: phenylalanine-4-hydroxylase [Sus scrofa]	molecular function: catalytic activity (GO:0003824);; biological process: metabolic process (GO:0008152);; biological process: single-organism process (GO:0044699);; molecular function: binding (GO:0005488);; biological process: cellular process (GO:0009987)
ENSSSCG00000000896	NTN4	1.43375	237	1.46357	228	0.925351	151	0.989861	160	2.19755	381	2.32307	415	1.68248	283	2.16942	342	2.44129e-05	-0.830794	down	--	--	Biological Process: animal organ morphogenesis (GO:0009887);; Biological Process: tissue development (GO:0009888);; Biological Process: neuron remodeling (GO:0016322);; Biological Process: cell migration (GO:0016477);; Biological Process: substrate adhesion-dependent cell spreading (GO:0034446);; Molecular Function: laminin-1 binding (GO:0043237);; Cellular Component: laminin complex (GO:0043256)…	K06845|0.0e+00|ssc:100516554|K06845 netrin 4 | (RefSeq) NTN4; netrin-4 isoform X2	Axon guidance (ko04360)	[W]	Extracellular structures	Laminin N-terminal (Domain VI)	Netrin-4 OS=Pongo abelii OX=9601 GN=NTN4 PE=2 SV=1	W	Extracellular structures	netrin-4 isoform X2 [Sus scrofa]	biological process: developmental process (GO:0032502);; biological process: single-organism process (GO:0044699);; biological process: cellular process (GO:0009987);; biological process: multicellular organismal process (GO:0032501);; biological process: locomotion (GO:0040011);; biological process: localization (GO:0051179);; biological process: biological adhesion (GO:0022610);; biological pro…
ENSSSCG00000000983	ENSSSCG00000000983	0.823226	205	0.60146	141	0.858625	211	0.818764	199	0.610708	159	0.534077	144	0.389651	102	0.443709	106	0.00452166	0.613215	up	--	--	Molecular Function: interleukin-17 receptor activity (GO:0030368);;	K16608|1.2e-133|fca:101100574|K16608 tubulin monoglycylase TTLL3/8 [EC:6.3.2.-] | (RefSeq) protein monoglycylase TTLL8 isoform X1	--	--	--	Interleukin-17 receptor extracellular region	--	S	Function unknown	putative interleukin-17 receptor E-like isoform X1 [Sus scrofa]	molecular function: signal transducer activity (GO:0004871);; molecular function: molecular transducer activity (GO:0060089);; biological process: cellular process (GO:0009987);; biological process: signaling (GO:0023052);; biological process: single-organism process (GO:0044699);; biological process: response to stimulus (GO:0050896);; biological process: biological regulation (GO:0065007)
ENSSSCG00000001045	ELOVL2	0.676216	119	0.608666	101	0.627528	111	0.702007	122	0.281204	52	0.309848	61	0.268997	51	0.321059	55	7.53049e-07	1.09023	up	--	--	Cellular Component: endoplasmic reticulum membrane (GO:0005789);; Biological Process: unsaturated fatty acid biosynthetic process (GO:0006636);; Molecular Function: fatty acid elongase activity (GO:0009922);; Cellular Component: integral component of membrane (GO:0016021);; Biological Process: fatty acid elongation, saturated fatty acid (GO:0019367);; Biological Process: fatty acid elongation, po…	K10205|2.4e-172|ssc:100153368|K10205 elongation of very long chain fatty acids protein 2 [EC:2.3.1.199] | (RefSeq) ELOVL2; elongation of very long chain fatty acids protein 2 isoform X1	Fatty acid elongation (ko00062);; Biosynthesis of unsaturated fatty acids (ko01040);; Fatty acid metabolism (ko01212)	[I]	Lipid transport and metabolism	GNS1/SUR4 family	Elongation of very long chain fatty acids protein 5 OS=Bos taurus OX=9913 GN=ELOVL5 PE=2 SV=1	I	Lipid transport and metabolism	elongation of very long chain fatty acids protein 2 isoform X2 [Sus scrofa]	cellular component: cell (GO:0005623);; cellular component: membrane (GO:0016020);; cellular component: organelle (GO:0043226);; cellular component: organelle part (GO:0044422);; cellular component: membrane part (GO:0044425);; cellular component: cell part (GO:0044464);; biological process: metabolic process (GO:0008152);; biological process: cellular process (GO:0009987);; biological process: s…
ENSSSCG00000001434	EGFL8	4.08936	239	4.43459	243	2.06272	119	3.39162	194	2.32179	142	1.5888	101	1.92195	118	1.90675	106	0.000821926	0.810703	up	--	--	Molecular Function: calcium ion binding (GO:0005509);;	K06824|1.7e-14|xco:114157611|K06824 nephronectin | (RefSeq) nephronectin-like	ECM-receptor interaction (ko04512)	[T]	Signal transduction mechanisms	EMI domain	Epidermal growth factor-like protein 8 OS=Sus scrofa OX=9823 GN=EGFL8 PE=3 SV=1	T	Signal transduction mechanisms	epidermal growth factor-like protein 8 precursor [Sus scrofa]	molecular function: binding (GO:0005488)
ENSSSCG00000001435	AGPAT1	88.9382	8362	96.4078	7814	128.896	11377	88.483	7915	45.0596	4451	52.2404	4676	50.2532	4717	51.1766	4623	1.27986e-19	0.983912	up	[I]	Lipid transport and metabolism	Molecular Function: 1-acylglycerol-3-phosphate O-acyltransferase activity (GO:0003841);; Biological Process: phospholipid biosynthetic process (GO:0008654);; Cellular Component: integral component of membrane (GO:0016021);;	K13509|8.4e-155|mna:107538983|K13509 lysophosphatidate acyltransferase [EC:2.3.1.51] | (RefSeq) AGPAT1; 1-acyl-sn-glycerol-3-phosphate acyltransferase alpha isoform X1	Glycerolipid metabolism (ko00561);; Glycerophospholipid metabolism (ko00564);; Phospholipase D signaling pathway (ko04072);; Fat digestion and absorption (ko04975)	[I]	Lipid transport and metabolism	Acyltransferase	1-acyl-sn-glycerol-3-phosphate acyltransferase alpha OS=Bos taurus OX=9913 GN=AGPAT1 PE=2 SV=1	I	Lipid transport and metabolism	1-acylglycerol-3-phosphate O-acyltransferase 1 [Sus scrofa]	molecular function: catalytic activity (GO:0003824);; biological process: metabolic process (GO:0008152);; biological process: cellular process (GO:0009987);; biological process: single-organism process (GO:0044699);; cellular component: membrane (GO:0016020);; cellular component: membrane part (GO:0044425)
ENSSSCG00000001455	ENSSSCG00000001455	1.78938	155	1.39764	107	1.24035	106	1.93541	163	0.778752	70	0.676531	61	0.715835	61	1.36688	101	0.000748465	0.885491	up	--	--	Biological Process: immune response (GO:0006955);; Cellular Component: integral component of membrane (GO:0016021);; Biological Process: antigen processing and presentation (GO:0019882);; Cellular Component: MHC class II protein complex (GO:0042613);;	K06752|2.7e-120|ssc:100153386|K06752 MHC class II antigen | (RefSeq) SLA-DRB1; MHC class II histocompatibility antigen SLA-DRB1 precursor	Phagosome (ko04145);; Cell adhesion molecules (ko04514);; Antigen processing and presentation (ko04612);; Hematopoietic cell lineage (ko04640);; Th1 and Th2 cell differentiation (ko04658);; Th17 cell differentiation (ko04659);; Intestinal immune network for IgA production (ko04672);; Type I diabetes mellitus (ko04940);; Leishmaniasis (ko05140);; Toxoplasmosis (ko05145);; Staphylococcus aureus inf…	--	--	Class II histocompatibility antigen, beta domain	DLA class II histocompatibility antigen, DR-1 beta chain OS=Canis lupus familiaris OX=9615 PE=2 SV=1	T	Signal transduction mechanisms	SLA-DR-beta class II light chain [Sus scrofa]	biological process: immune system process (GO:0002376);; biological process: response to stimulus (GO:0050896);; cellular component: membrane (GO:0016020);; cellular component: membrane part (GO:0044425);; cellular component: cell (GO:0005623);; cellular component: macromolecular complex (GO:0032991);; cellular component: cell part (GO:0044464)
ENSSSCG00000001469	SLA-DMB	1.02922	170	1.02073	159	0.942547	154	1.25159	202	0.241156	42	0.531999	95	0.527878	92	0.46838	74	2.23202e-06	1.21982	up	--	--	Biological Process: immune response (GO:0006955);; Cellular Component: integral component of membrane (GO:0016021);; Biological Process: antigen processing and presentation (GO:0019882);; Cellular Component: MHC class II protein complex (GO:0042613);;	K06752|2.5e-161|ssc:100135050|K06752 MHC class II antigen | (RefSeq) SLA-DMB; MHC class II, DM beta precursor	Phagosome (ko04145);; Cell adhesion molecules (ko04514);; Antigen processing and presentation (ko04612);; Hematopoietic cell lineage (ko04640);; Th1 and Th2 cell differentiation (ko04658);; Th17 cell differentiation (ko04659);; Intestinal immune network for IgA production (ko04672);; Type I diabetes mellitus (ko04940);; Leishmaniasis (ko05140);; Toxoplasmosis (ko05145);; Staphylococcus aureus inf…	--	--	Class II histocompatibility antigen, beta domain	DLA class I histocompatibility antigen, A9/A9 alpha chain OS=Canis lupus familiaris OX=9615 PE=2 SV=1	T	Signal transduction mechanisms	MHC class II, DM beta precursor [Sus scrofa]	biological process: immune system process (GO:0002376);; biological process: response to stimulus (GO:0050896);; cellular component: membrane (GO:0016020);; cellular component: membrane part (GO:0044425);; cellular component: cell (GO:0005623);; cellular component: macromolecular complex (GO:0032991);; cellular component: cell part (GO:0044464)
ENSSSCG00000001487	KLHL31	0.201538	60	0.299074	84	0.350066	103	0.16518	48	0.125359	39	0.032989	11	0.059569	19	0.113879	33	2.03341e-05	1.56379	up	[M]	Cell wall/membrane/envelope biogenesis	Cellular Component: nucleus (GO:0005634);; Cellular Component: cytoplasm (GO:0005737);; Biological Process: negative regulation of JNK cascade (GO:0046329);;	K10467|0.0e+00|ssc:100152767|K10467 kelch-like protein 31 | (RefSeq) KLHL31; kelch-like protein 31	--	[TR]	Signal transduction mechanisms;; General function prediction only	Kelch motif	Kelch-like protein 9 OS=Bos taurus OX=9913 GN=KLHL9 PE=2 SV=1	T	Signal transduction mechanisms	kelch-like protein 31 [Sus scrofa]	cellular component: cell (GO:0005623);; cellular component: organelle (GO:0043226);; cellular component: cell part (GO:0044464);; biological process: biological regulation (GO:0065007)
ENSSSCG00000001498	BEND6	1.39142	151	1.53763	157	1.55721	167	1.6765	177	3.01693	343	2.75876	324	2.93669	335	2.70984	281	2.18148e-08	-0.927071	down	--	--	Molecular Function: chromatin binding (GO:0003682);; Molecular Function: transcription corepressor activity (GO:0003714);; Cellular Component: nucleus (GO:0005634);; Biological Process: positive regulation of neuron differentiation (GO:0045666);; Biological Process: negative regulation of Notch signaling pathway (GO:0045746);;	--	--	--	--	BEN domain	--	S	Function unknown	BEN domain-containing protein 6 isoform X1 [Sus scrofa]	molecular function: binding (GO:0005488);; molecular function: transcription factor activity, protein binding (GO:0000988);; biological process: biological regulation (GO:0065007);; cellular component: cell (GO:0005623);; cellular component: organelle (GO:0043226);; cellular component: cell part (GO:0044464);; biological process: cellular process (GO:0009987);; biological process: multicellular o…
ENSSSCG00000001510	KIFC1	1.91494	286	1.30964	184	1.08892	161	1.45667	212	4.84018	755	2.6587	428	2.45358	384	1.1473	164	0.00170251	-0.97355	down	--	--	Molecular Function: microtubule motor activity (GO:0003777);; Molecular Function: ATP binding (GO:0005524);; Cellular Component: nucleus (GO:0005634);; Cellular Component: microtubule organizing center (GO:0005815);; Cellular Component: kinesin complex (GO:0005871);; Cellular Component: microtubule (GO:0005874);; Biological Process: microtubule-based movement (GO:0007018);; Biological Process: mi…	K10405|0.0e+00|ssc:100154627|K10405 kinesin family member C1 | (RefSeq) KIFC1; kinesin-like protein KIFC1 isoform X2	--	[Z]	Cytoskeleton	Kinesin motor domain	Kinesin-like protein KIF3A OS=Macaca fascicularis OX=9541 GN=KIF3A PE=2 SV=1	Z	Cytoskeleton	kinesin-like protein KIFC1 isoform X2 [Sus scrofa]	molecular function: catalytic activity (GO:0003824);; molecular function: binding (GO:0005488);; cellular component: cell (GO:0005623);; cellular component: organelle (GO:0043226);; cellular component: cell part (GO:0044464);; cellular component: organelle part (GO:0044422);; cellular component: macromolecular complex (GO:0032991);; cellular component: supramolecular complex (GO:0099080);; biolog…
ENSSSCG00000001535	TCP11	1.04789	101	1.22403	111	1.7296	164	0.518521	49	0.347527	35	0.613985	64	0.578716	59	0.534908	50	0.00107367	1.0706	up	--	--	Cellular Component: acrosomal vesicle (GO:0001669);; Biological Process: signal transduction (GO:0007165);; Biological Process: protein kinase A signaling (GO:0010737);; Cellular Component: sperm flagellum (GO:0036126);; Biological Process: regulation of sperm capacitation (GO:1902490);;	--	--	[T]	Signal transduction mechanisms	T-complex protein 11	T-complex protein 11-like protein 2 OS=Bos taurus OX=9913 GN=TCP11L2 PE=2 SV=1	T	Signal transduction mechanisms	T-complex protein 11 homolog isoform X1 [Sus scrofa]	cellular component: cell (GO:0005623);; cellular component: organelle (GO:0043226);; cellular component: cell part (GO:0044464);; biological process: cellular process (GO:0009987);; biological process: biological regulation (GO:0065007);; biological process: signaling (GO:0023052);; biological process: single-organism process (GO:0044699);; biological process: response to stimulus (GO:0050896)
ENSSSCG00000001539	PPARD	20.216	3123	20.1935	2932	25.6877	3914	20.1281	3038	13.6963	2218	13.2282	2209	14.1311	2291	14.8484	2190	5.52818e-10	0.589345	up	--	--	Molecular Function: steroid hormone receptor activity (GO:0003707);; Molecular Function: RNA polymerase II transcription factor activity, ligand-activated sequence-specific DNA binding (GO:0004879);; Cellular Component: nucleus (GO:0005634);; Molecular Function: zinc ion binding (GO:0008270);; Cellular Component: host cell nucleus (GO:0042025);; Molecular Function: sequence-specific DNA binding (…	K04504|6.2e-207|ssc:397297|K04504 peroxisome proliferator-activated receptor delta | (RefSeq) PPARD; peroxisome proliferator-activated receptor delta	PPAR signaling pathway (ko03320);; Wnt signaling pathway (ko04310);; Pathways in cancer (ko05200);; Acute myeloid leukemia (ko05221)	[T]	Signal transduction mechanisms	Zinc finger, C4 type (two domains)	Peroxisome proliferator-activated receptor delta OS=Canis lupus familiaris OX=9615 GN=PPARD PE=2 SV=1	T	Signal transduction mechanisms	peroxisome proliferator-activated receptor delta [Sus scrofa]	molecular function: signal transducer activity (GO:0004871);; molecular function: molecular transducer activity (GO:0060089);; biological process: cellular process (GO:0009987);; biological process: signaling (GO:0023052);; biological process: single-organism process (GO:0044699);; biological process: response to stimulus (GO:0050896);; biological process: biological regulation (GO:0065007);; mol…
ENSSSCG00000001550	ARMC12	0.466988	112	0.441441	99	0.576652	110	0.44223	96	0.492244	85	0.31361	66	0.272002	63	0.290109	52	0.0015774	0.696426	up	--	--	--	--	--	--	--	Armadillo-like	--	S	Function unknown	armadillo repeat-containing protein 12 [Sus scrofa]	--
ENSSSCG00000001841	RHCG	2.16559	250	1.69237	183	1.57211	179	1.70167	192	3.12606	377	3.07779	383	2.67122	323	3.19958	352	1.78758e-06	-0.795386	down	[P]	Inorganic ion transport and metabolism	Cellular Component: integral component of plasma membrane (GO:0005887);; Biological Process: cellular ion homeostasis (GO:0006873);; Biological Process: regulation of pH (GO:0006885);; Molecular Function: ammonium transmembrane transporter activity (GO:0008519);; Cellular Component: basolateral plasma membrane (GO:0016323);; Cellular Component: apical plasma membrane (GO:0016324);; Molecular Func…	K06580|1.4e-262|ssc:733644|K06580 ammonium transporter Rh | (RefSeq) RHCG; ammonium transporter Rh type C	--	[UR]	Intracellular trafficking, secretion, and vesicular transport;; General function prediction only	Ammonium Transporter Family	Ammonium transporter Rh type C OS=Sus scrofa OX=9823 GN=RHCG PE=2 SV=1	U	Intracellular trafficking, secretion, and vesicular transport	ammonium transporter Rh type C isoform X1 [Sus scrofa]	cellular component: cell (GO:0005623);; cellular component: membrane (GO:0016020);; cellular component: membrane part (GO:0044425);; cellular component: cell part (GO:0044464);; biological process: cellular process (GO:0009987);; biological process: single-organism process (GO:0044699);; biological process: biological regulation (GO:0065007);; molecular function: transporter activity (GO:0005215)…
ENSSSCG00000001844	PLIN1	99.3286	16115	103.29	15781	103.324	16555	94.3881	14982	54.619	9279	52.804	9265	55.6281	9479	62.1488	9626	3.18993e-26	0.793632	up	--	--	Cellular Component: lipid droplet (GO:0005811);; Biological Process: lipid metabolic process (GO:0006629);;	K08768|7.9e-245|ssc:654411|K08768 perilipin-1 | (RefSeq) PLIN1; perilipin-1	PPAR signaling pathway (ko03320);; Apelin signaling pathway (ko04371);; Thermogenesis (ko04714);; Regulation of lipolysis in adipocytes (ko04923)	--	--	Perilipin family	Perilipin-3 OS=Sus scrofa OX=9823 GN=PLIN3 PE=2 SV=1	S	Function unknown	perilipin-1 [Sus scrofa]	cellular component: cell (GO:0005623);; cellular component: organelle (GO:0043226);; cellular component: cell part (GO:0044464);; biological process: metabolic process (GO:0008152);; biological process: single-organism process (GO:0044699)
ENSSSCG00000001909	STRA6	0.959506	130	0.881751	112	1.76539	236	1.22126	162	2.35071	333	2.56916	376	2.10688	299	1.94504	251	5.42563e-05	-0.921902	down	--	--	Biological Process: kidney development (GO:0001822);; Biological Process: pulmonary valve morphogenesis (GO:0003184);; Biological Process: ventricular septum development (GO:0003281);; Cellular Component: plasma membrane (GO:0005886);; Cellular Component: integral component of plasma membrane (GO:0005887);; Biological Process: feeding behavior (GO:0007631);; Biological Process: adrenal gland deve…	K23088|0.0e+00|ssc:100153335|K23088 vitamin A receptor/transporter (stra6) family protein | (RefSeq) STRA6; stimulated by retinoic acid gene 6 protein homolog	--	--	--	Retinol binding protein receptor	Receptor for retinol uptake STRA6 OS=Bos taurus OX=9913 GN=STRA6 PE=1 SV=1	T	Signal transduction mechanisms	stimulated by retinoic acid gene 6 protein homolog [Sus scrofa]	biological process: multicellular organismal process (GO:0032501);; biological process: developmental process (GO:0032502);; biological process: single-organism process (GO:0044699);; cellular component: cell (GO:0005623);; cellular component: membrane (GO:0016020);; cellular component: cell part (GO:0044464);; cellular component: membrane part (GO:0044425);; biological process: behavior (GO:0007…
ENSSSCG00000001977	STXBP6	0.549808	100	1.24664	153	0.55623	98	0.516589	90	0.937272	187	1.17189	234	1.13508	212	0.756587	129	0.00219445	-0.731344	down	--	--	Cellular Component: integral component of membrane (GO:0016021);; Biological Process: vesicle-mediated transport (GO:0016192);; Biological Process: regulation of SNARE complex assembly (GO:0035542);;	K08519|2.7e-119|chx:102177755|K08519 syntaxin-binding protein 6 | (RefSeq) STXBP6; syntaxin binding protein 6	--	[U]	Intracellular trafficking, secretion, and vesicular transport	Exocyst complex component SEC3 N-terminal PIP2 binding PH	Syntaxin-binding protein 6 OS=Bos taurus OX=9913 GN=STXBP6 PE=2 SV=1	U	Intracellular trafficking, secretion, and vesicular transport	syntaxin-binding protein 6 isoform X2 [Sus scrofa]	cellular component: membrane (GO:0016020);; cellular component: membrane part (GO:0044425);; biological process: localization (GO:0051179);; biological process: biological regulation (GO:0065007)
ENSSSCG00000002032	SLC7A8	2.02009	426	2.30245	455	2.29591	479	2.50727	516	0.911407	202	0.969579	221	1.00327	223	1.13599	208	1.21405e-14	1.18104	up	[E]	Amino acid transport and metabolism	Cellular Component: plasma membrane (GO:0005886);; Molecular Function: organic cation transmembrane transporter activity (GO:0015101);; Molecular Function: L-amino acid transmembrane transporter activity (GO:0015179);; Cellular Component: integral component of membrane (GO:0016021);; Molecular Function: toxin transporter activity (GO:0019534);;	K13781|8.7e-283|cfr:102515890|K13781 solute carrier family 7 (L-type amino acid transporter), member 8 | (RefSeq) SLC7A8; large neutral amino acids transporter small subunit 2 isoform X1	Protein digestion and absorption (ko04974)	[E]	Amino acid transport and metabolism	Amino acid permease	Large neutral amino acids transporter small subunit 2 OS=Oryctolagus cuniculus OX=9986 GN=SLC7A8 PE=1 SV=1	E	Amino acid transport and metabolism	large neutral amino acids transporter small subunit 2 isoform X1 [Sus scrofa]	cellular component: cell (GO:0005623);; cellular component: membrane (GO:0016020);; cellular component: cell part (GO:0044464);; molecular function: transporter activity (GO:0005215);; biological process: localization (GO:0051179);; biological process: single-organism process (GO:0044699);; cellular component: membrane part (GO:0044425)
ENSSSCG00000002041	SLC7A7	3.35837	517	3.04136	427	3.14696	468	2.37245	347	1.64984	290	1.30475	257	1.42754	245	2.00095	304	1.57772e-05	0.717226	up	[E]	Amino acid transport and metabolism	Biological Process: regulation of arginine metabolic process (GO:0000821);; Molecular Function: basic amino acid transmembrane transporter activity (GO:0015174);; Cellular Component: integral component of membrane (GO:0016021);;	K13867|2.9e-267|ssc:100037972|K13867 solute carrier family 7 (L-type amino acid transporter), member 7 | (RefSeq) SLC7A7; Y+L amino acid transporter 1	Protein digestion and absorption (ko04974)	[E]	Amino acid transport and metabolism	Amino acid permease	Large neutral amino acids transporter small subunit 2 OS=Pongo abelii OX=9601 GN=SLC7A8 PE=2 SV=2	E	Amino acid transport and metabolism	Y+L amino acid transporter 1 isoform X1 [Monodon monoceros]	biological process: biological regulation (GO:0065007);; molecular function: transporter activity (GO:0005215);; biological process: single-organism process (GO:0044699);; biological process: localization (GO:0051179);; cellular component: membrane (GO:0016020);; cellular component: membrane part (GO:0044425)
ENSSSCG00000002257	MCTP2	2.93266	614	2.0249	424	2.57035	580	2.21521	473	1.27371	308	1.44786	313	2.02693	352	1.96177	389	6.43991e-05	0.651224	up	--	--	Cellular Component: integral component of membrane (GO:0016021);;	K20045|1.2e-12|fcd:110859882|K20045 intersectin | (RefSeq) intersectin-2-like isoform X1	--	[R]	General function prediction only	C2 domain	Synaptotagmin-10 OS=Pongo abelii OX=9601 GN=SYT10 PE=2 SV=1	S	Function unknown	multiple C2 and transmembrane domain-containing protein 2 isoform X5 [Sus scrofa]	cellular component: membrane (GO:0016020);; cellular component: membrane part (GO:0044425)
ENSSSCG00000002309	PLEKHD1	0.420676	62	0.737073	102	0.408725	60	0.559954	81	0.142159	22	0.243518	39	0.35931	56	0.215953	31	0.000388515	1.09163	up	--	--	--	--	--	--	--	PH domain	--	T	Signal transduction mechanisms	pleckstrin homology domain-containing family D member 1 [Sus scrofa]	--
ENSSSCG00000002314	SMOC1	14.0862	1714	13.7842	1502	14.7202	1739	12.2363	1656	7.86953	1016	6.78509	898	8.00482	1100	8.71671	1024	4.74077e-14	0.752128	up	--	--	Molecular Function: calcium ion binding (GO:0005509);; Molecular Function: extracellular matrix binding (GO:0050840);;	K24354|4.0e-255|ssc:100157351|K24354 SPARC-related modular calcium-binding protein | (RefSeq) SMOC1; SPARC-related modular calcium-binding protein 1 isoform X1	--	[R]	General function prediction only	Thyroglobulin type-1 repeat	--	S	Function unknown	hypothetical protein G4228_008749 [Cervus hanglu yarkandensis]	molecular function: binding (GO:0005488)
ENSSSCG00000002315	SLC8A3	1.47475	335	1.53667	329	1.41208	318	1.70879	380	2.48748	594	2.99891	738	3.04649	728	2.91631	633	8.17247e-12	-0.937433	down	--	--	Biological Process: hematopoietic progenitor cell differentiation (GO:0002244);; Molecular Function: calcium:sodium antiporter activity (GO:0005432);; Cellular Component: mitochondrial outer membrane (GO:0005741);; Cellular Component: endoplasmic reticulum membrane (GO:0005789);; Cellular Component: integral component of plasma membrane (GO:0005887);; Biological Process: mitochondrial calcium ion…	K05849|0.0e+00|eai:106847743|K05849 solute carrier family 8 (sodium/calcium exchanger) | (RefSeq) SLC8A3; solute carrier family 8 member A3	Calcium signaling pathway (ko04020);; cGMP-PKG signaling pathway (ko04022);; Cardiac muscle contraction (ko04260);; Adrenergic signaling in cardiomyocytes (ko04261);; Apelin signaling pathway (ko04371);; Olfactory transduction (ko04740);; Endocrine and other factor-regulated calcium reabsorption (ko04961);; Protein digestion and absorption (ko04974);; Mineral absorption (ko04978);; Hypertrophic c…	[PT]	Inorganic ion transport and metabolism;; Signal transduction mechanisms	Calx-beta domain	Sodium/calcium exchanger 1 OS=Canis lupus familiaris OX=9615 GN=SLC8A1 PE=1 SV=1	--	--	sodium/calcium exchanger 3 isoform X1 [Sus scrofa]	biological process: cellular process (GO:0009987);; biological process: developmental process (GO:0032502);; biological process: single-organism process (GO:0044699);; molecular function: transporter activity (GO:0005215);; biological process: localization (GO:0051179);; cellular component: cell (GO:0005623);; cellular component: membrane (GO:0016020);; cellular component: organelle (GO:0043226);…
ENSSSCG00000002341	PAPLN	3.51128	1107	4.29141	1272	3.03869	946	3.8184	1177	1.93415	639	1.63318	557	1.82607	605	2.01917	608	1.3144e-14	0.945717	up	[R]	General function prediction only	Molecular Function: serine-type endopeptidase inhibitor activity (GO:0004867);; Molecular Function: peptidase activity (GO:0008233);;	K23624|0.0e+00|ssc:100523451|K23624 papilin | (RefSeq) PAPLN; papilin	--	[T]	Signal transduction mechanisms	Immunoglobulin domain	Tissue factor pathway inhibitor OS=Oryctolagus cuniculus OX=9986 GN=TFPI PE=2 SV=2	T	Signal transduction mechanisms	papilin [Sus scrofa]	molecular function: molecular function regulator (GO:0098772);; biological process: biological regulation (GO:0065007);; molecular function: catalytic activity (GO:0003824)
ENSSSCG00000002383	FOS	6.62122	1403	6.60195	1316	5.76544	1200	7.25537	1516	2.5338	556	2.80554	609	2.85072	621	2.48113	498	2.51673e-33	1.29831	up	--	--	Molecular Function: RNA polymerase II core promoter proximal region sequence-specific DNA binding (GO:0000978);; Molecular Function: RNA polymerase II core promoter sequence-specific DNA binding (GO:0000979);; Molecular Function: RNA polymerase II transcription factor activity, sequence-specific DNA binding (GO:0000981);; Molecular Function: RNA polymerase II activating transcription factor bindi…	K04379|1.9e-207|ssc:100144486|K04379 proto-oncogene protein c-fos | (RefSeq) FOS; proto-oncogene c-Fos	Endocrine resistance (ko01522);; MAPK signaling pathway (ko04010);; cAMP signaling pathway (ko04024);; Apoptosis (ko04210);; Osteoclast differentiation (ko04380);; Toll-like receptor signaling pathway (ko04620);; IL-17 signaling pathway (ko04657);; Th1 and Th2 cell differentiation (ko04658);; Th17 cell differentiation (ko04659);; T cell receptor signaling pathway (ko04660);; B cell receptor signa…	[K]	Transcription	bZIP transcription factor	Proto-oncogene c-Fos OS=Sus scrofa OX=9823 GN=FOS PE=3 SV=2	K	Transcription	proto-oncogene c-Fos [Sus scrofa]	molecular function: binding (GO:0005488);; molecular function: nucleic acid binding transcription factor activity (GO:0001071);; biological process: biological regulation (GO:0065007);; cellular component: cell (GO:0005623);; cellular component: organelle (GO:0043226);; cellular component: cell part (GO:0044464);; cellular component: organelle part (GO:0044422);; biological process: cellular proc…
ENSSSCG00000002432	KCNK13	2.75589	265	3.13775	284	2.13689	203	2.90709	274	1.83743	185	1.71176	178	1.16179	118	1.34374	124	7.06833e-05	0.812927	up	--	--	Cellular Component: integral component of plasma membrane (GO:0005887);; Molecular Function: potassium ion leak channel activity (GO:0022841);; Biological Process: stabilization of membrane potential (GO:0030322);; Biological Process: potassium ion transmembrane transport (GO:0071805);;	K04922|2.9e-233|ssc:100623906|K04922 potassium channel subfamily K member 13 | (RefSeq) KCNK13; potassium channel subfamily K member 13	--	[P]	Inorganic ion transport and metabolism	Ion channel	--	P	Inorganic ion transport and metabolism	potassium channel subfamily K member 13 [Sus scrofa]	cellular component: cell (GO:0005623);; cellular component: membrane (GO:0016020);; cellular component: membrane part (GO:0044425);; cellular component: cell part (GO:0044464);; molecular function: transporter activity (GO:0005215);; biological process: cellular process (GO:0009987);; biological process: single-organism process (GO:0044699);; biological process: localization (GO:0051179);; biolog…
ENSSSCG00000002516	WARS1	117.235	13661	122.776	13119	126.705	14379	116.538	13076	185.546	22237	181.939	22447	175.369	21138	175.104	19222	8.42946e-19	-0.602448	down	[J]	Translation, ribosomal structure and biogenesis	Molecular Function: tryptophan-tRNA ligase activity (GO:0004830);; Molecular Function: ATP binding (GO:0005524);; Cellular Component: nucleus (GO:0005634);; Cellular Component: cytoplasm (GO:0005737);; Cellular Component: cytosol (GO:0005829);; Biological Process: tryptophanyl-tRNA aminoacylation (GO:0006436);; Biological Process: negative regulation of protein kinase activity (GO:0006469);; Biol…	K01867|1.2e-278|ssc:100515390|K01867 tryptophanyl-tRNA synthetase [EC:6.1.1.2] | (RefSeq) WARS; tryptophan--tRNA ligase, cytoplasmic	Aminoacyl-tRNA biosynthesis (ko00970)	[J]	Translation, ribosomal structure and biogenesis	tRNA synthetases class I (W and Y)	Tryptophan--tRNA ligase, cytoplasmic OS=Bos taurus OX=9913 GN=WARS1 PE=1 SV=3	J	Translation, ribosomal structure and biogenesis	tryptophan--tRNA ligase, cytoplasmic [Sus scrofa]	molecular function: catalytic activity (GO:0003824);; molecular function: binding (GO:0005488);; cellular component: cell (GO:0005623);; cellular component: organelle (GO:0043226);; cellular component: cell part (GO:0044464);; biological process: metabolic process (GO:0008152);; biological process: cellular process (GO:0009987);; biological process: single-organism process (GO:0044699);; biologic…
ENSSSCG00000002825	ENSSSCG00000002825	1.25884	136	1.85214	201	1.53814	163	1.53075	149	0.958873	112	0.567169	75	1.41922	145	0.677619	64	0.00323629	0.769025	up	[I]	Lipid transport and metabolism	Molecular Function: hydrolase activity (GO:0016787);;	K01044|2.0e-278|ssc:397478|K01044 carboxylesterase 1 [EC:3.1.1.1] | (RefSeq) CES1; liver carboxylesterase precursor	Drug metabolism - other enzymes (ko00983)	[R]	General function prediction only	Carboxylesterase family	Liver carboxylesterase OS=Sus scrofa OX=9823 PE=1 SV=1	I	Lipid transport and metabolism	liver carboxylesterase isoform X1 [Sus scrofa]	molecular function: catalytic activity (GO:0003824)
ENSSSCG00000002827	SLC6A2	1.10757	279	1.18898	282	1.06714	265	1.12162	276	1.81473	479	1.82162	496	1.74946	462	1.45401	350	8.69632e-06	-0.64588	down	[R]	General function prediction only	Molecular Function: actin binding (GO:0003779);; Molecular Function: neurotransmitter:sodium symporter activity (GO:0005328);; Molecular Function: dopamine:sodium symporter activity (GO:0005330);; Molecular Function: norepinephrine:sodium symporter activity (GO:0005334);; Cellular Component: plasma membrane (GO:0005886);; Cellular Component: integral component of plasma membrane (GO:0005887);; Bi…	K05035|0.0e+00|ssc:100517716|K05035 solute carrier family 6 (neurotransmitter transporter, noradrenalin) member 2 | (RefSeq) SLC6A2; sodium-dependent noradrenaline transporter	Synaptic vesicle cycle (ko04721)	[T]	Signal transduction mechanisms	Sodium:neurotransmitter symporter family	Sodium-dependent noradrenaline transporter OS=Bos taurus OX=9913 GN=SLC6A2 PE=2 SV=1	T	Signal transduction mechanisms	sodium-dependent noradrenaline transporter [Sus scrofa]	molecular function: binding (GO:0005488);; molecular function: transporter activity (GO:0005215);; biological process: single-organism process (GO:0044699);; biological process: localization (GO:0051179);; cellular component: cell (GO:0005623);; cellular component: membrane (GO:0016020);; cellular component: cell part (GO:0044464);; cellular component: membrane part (GO:0044425);; cellular compon…
ENSSSCG00000002847	GPT2	3.94306	758	4.04378	729	3.47651	641	3.74338	684	6.5468	1312	5.38098	1116	5.76524	1171	5.24237	962	9.96331e-10	-0.649815	down	[E]	Amino acid transport and metabolism	Molecular Function: catalytic activity (GO:0003824);; Biological Process: biosynthetic process (GO:0009058);; Molecular Function: pyridoxal phosphate binding (GO:0030170);;	K00814|1.5e-290|ssc:100521318|K00814 alanine transaminase [EC:2.6.1.2] | (RefSeq) GPT2; alanine aminotransferase 2	Arginine biosynthesis (ko00220);; Alanine, aspartate and glutamate metabolism (ko00250);; Carbon metabolism (ko01200);; 2-Oxocarboxylic acid metabolism (ko01210);; Biosynthesis of amino acids (ko01230)	[E]	Amino acid transport and metabolism	Aminotransferase class I and II	Alanine aminotransferase 1 OS=Bos taurus OX=9913 GN=GPT PE=2 SV=1	E	Amino acid transport and metabolism	alanine aminotransferase 2 [Sus scrofa]	molecular function: catalytic activity (GO:0003824);; biological process: metabolic process (GO:0008152);; molecular function: binding (GO:0005488)
ENSSSCG00000002849	SHCBP1	2.42703	359	2.54877	354	2.47149	360	2.1449	311	5.6707	876	4.33771	692	4.24332	656	2.30474	324	6.7538e-05	-0.817671	down	--	--	Biological Process: fibroblast growth factor receptor signaling pathway (GO:0008543);; Molecular Function: SH2 domain binding (GO:0042169);; Biological Process: regulation of neural precursor cell proliferation (GO:2000177);;	--	--	--	--	Right handed beta helix region	--	S	Function unknown	SHC SH2 domain-binding protein 1 [Sus scrofa]	biological process: cellular process (GO:0009987);; biological process: signaling (GO:0023052);; biological process: single-organism process (GO:0044699);; biological process: response to stimulus (GO:0050896);; biological process: biological regulation (GO:0065007);; molecular function: binding (GO:0005488)
ENSSSCG00000002866	CEBPA	70.9196	8261	76.1025	8329	85.758	9860	72.9877	8309	39.4953	4818	39.3977	4961	38.3367	4688	43.6492	4852	5.11864e-27	0.890547	up	--	--	Biological Process: urea cycle (GO:0000050);; Biological Process: negative regulation of transcription from RNA polymerase II promoter (GO:0000122);; Molecular Function: RNA polymerase II core promoter proximal region sequence-specific DNA binding (GO:0000978);; Molecular Function: transcriptional activator activity, RNA polymerase II transcription regulatory region sequence-specific binding (GO:…	K09055|1.2e-166|ssc:397307|K09055 CCAAT/enhancer binding protein (C/EBP), alpha | (RefSeq) CEBPA; CCAAT/enhancer-binding protein alpha	Non-alcoholic fatty liver disease (ko04932);; Pathways in cancer (ko05200);; Transcriptional misregulation in cancer (ko05202);; Acute myeloid leukemia (ko05221)	[K]	Transcription	Basic region leucine zipper	CCAAT/enhancer-binding protein alpha OS=Bos taurus OX=9913 GN=CEBPA PE=3 SV=1	K	Transcription	CCAAT/enhancer-binding protein alpha [Sus scrofa]	biological process: metabolic process (GO:0008152);; biological process: cellular process (GO:0009987);; biological process: single-organism process (GO:0044699);; biological process: biological regulation (GO:0065007);; molecular function: binding (GO:0005488);; molecular function: nucleic acid binding transcription factor activity (GO:0001071);; biological process: multicellular organismal proc…
ENSSSCG00000002918	ENSSSCG00000002918	1.15023	58	1.19392	60	1.87368	94	1.68788	78	0.824956	42	0.452226	28	0.906831	43	0.629007	28	9.37822e-05	1.08919	up	--	--	Molecular Function: receptor binding (GO:0005102);; Biological Process: positive regulation of phosphatidylinositol 3-kinase signaling (GO:0014068);; Cellular Component: integral component of membrane (GO:0016021);; Molecular Function: phosphatidylinositol 3-kinase binding (GO:0043548);; Biological Process: regulation of immune response (GO:0050776);;	K07988|4.5e-25|ssc:397267|K07988 hematopoietic cell signal transducer | (RefSeq) HCST; hematopoietic cell signal transducer precursor	Natural killer cell mediated cytotoxicity (ko04650)	--	--	DAP10 membrane protein	Hematopoietic cell signal transducer OS=Sus scrofa OX=9823 GN=HCST PE=1 SV=1	T	Signal transduction mechanisms	hematopoietic cell signal transducer isoform X1 [Sus scrofa]	molecular function: binding (GO:0005488);; biological process: biological regulation (GO:0065007);; cellular component: membrane (GO:0016020);; cellular component: membrane part (GO:0044425)
ENSSSCG00000002919	TYROBP	8.01927	193	9.30001	214	7.69421	184	7.02413	165	3.00457	76	2.61207	69	2.75689	68	3.13724	72	1.48482e-12	1.44876	up	--	--	Cellular Component: integral component of membrane (GO:0016021);;	K07992|8.1e-50|ssc:397405|K07992 TYRO protein tyrosine kinase binding protein | (RefSeq) TYROBP; TYRO protein tyrosine kinase-binding protein precursor	Osteoclast differentiation (ko04380);; Natural killer cell mediated cytotoxicity (ko04650)	--	--	--	TYRO protein tyrosine kinase-binding protein OS=Sus scrofa OX=9823 GN=TYROBP PE=2 SV=1	T	Signal transduction mechanisms	TYRO protein tyrosine kinase-binding protein isoform X1 [Sus scrofa]	cellular component: membrane (GO:0016020);; cellular component: membrane part (GO:0044425)
ENSSSCG00000002955	CATSPERG	1.55173	257	1.48413	231	2.11581	344	1.43999	234	0.799502	139	0.85111	152	1.06959	185	1.14281	181	0.000329088	0.735753	up	--	--	Cellular Component: CatSper complex (GO:0036128);; Cellular Component: sperm principal piece (GO:0097228);;	K16894|0.0e+00|ssc:100516914|K16894 cation channel sperm-associated protein subunit gamma | (RefSeq) CATSPERG; cation channel sperm-associated protein subunit gamma	--	--	--	Cation channel sperm-associated protein subunit gamma	Cation channel sperm-associated protein subunit gamma OS=Macaca fascicularis OX=9541 GN=CATSPERG PE=2 SV=1	S	Function unknown	cation channel sperm-associated protein subunit gamma [Sus scrofa]	cellular component: cell (GO:0005623);; cellular component: membrane (GO:0016020);; cellular component: macromolecular complex (GO:0032991);; cellular component: membrane part (GO:0044425);; cellular component: cell part (GO:0044464);; cellular component: organelle (GO:0043226);; cellular component: organelle part (GO:0044422)
ENSSSCG00000002960	RASGRP4	0.369393	54	0.360832	50	0.378918	56	0.332619	48	0.158039	25	0.199425	32	0.204546	32	0.144346	21	0.000422235	0.964108	up	--	--	Molecular Function: Ras guanyl-nucleotide exchange factor activity (GO:0005088);; Cellular Component: nucleoplasm (GO:0005654);; Cellular Component: cytosol (GO:0005829);; Cellular Component: plasma membrane (GO:0005886);; Biological Process: small GTPase mediated signal transduction (GO:0007264);; Biological Process: cell proliferation (GO:0008283);; Biological Process: response to extracellular…	K12363|0.0e+00|ssc:100516199|K12363 RAS guanyl-releasing protein 4 | (RefSeq) RASGRP4; RAS guanyl-releasing protein 4	MAPK signaling pathway (ko04010);; Ras signaling pathway (ko04014);; Pathways in cancer (ko05200)	[T]	Signal transduction mechanisms	RasGEF domain	RAS guanyl-releasing protein 4 OS=Bos taurus OX=9913 GN=RASGRP4 PE=2 SV=1	T	Signal transduction mechanisms	RAS guanyl-releasing protein 4 [Sus scrofa]	molecular function: molecular function regulator (GO:0098772);; biological process: biological regulation (GO:0065007);; cellular component: cell (GO:0005623);; cellular component: organelle (GO:0043226);; cellular component: organelle part (GO:0044422);; cellular component: cell part (GO:0044464);; cellular component: membrane (GO:0016020);; biological process: cellular process (GO:0009987);; bi…
ENSSSCG00000002996	ENSSSCG00000002996	4.13407	346	2.67065	264	2.57403	214	2.2513	179	2.32045	203	2.9069	318	8.26073	1035	9.61425	1053	0.000827435	-1.37521	down	[R]	General function prediction only	Molecular Function: GTPase activity (GO:0003924);; Molecular Function: GTP binding (GO:0005525);; Cellular Component: integral component of membrane (GO:0016021);; Biological Process: Rab protein signal transduction (GO:0032482);;	K07880|1.9e-114|aju:106979634|K07880 Ras-related protein Rab-4B | (RefSeq) RAB4B; ras-related protein Rab-4B isoform X1	--	[U]	Intracellular trafficking, secretion, and vesicular transport	Ras family	Ras-related protein Rab-4B OS=Canis lupus familiaris OX=9615 GN=RAB4B PE=2 SV=1	U	Intracellular trafficking, secretion, and vesicular transport	hypothetical protein GH733_012442 [Mirounga leonina]	molecular function: catalytic activity (GO:0003824);; molecular function: binding (GO:0005488);; cellular component: membrane (GO:0016020);; cellular component: membrane part (GO:0044425);; biological process: cellular process (GO:0009987);; biological process: signaling (GO:0023052);; biological process: single-organism process (GO:0044699);; biological process: response to stimulus (GO:0050896)…
ENSSSCG00000003017	TGFB1	4.49417	629	4.40559	579	4.5785	632	4.02165	550	2.65284	389	1.88835	286	2.22035	326	2.03832	272	8.84882e-12	0.955452	up	--	--	Biological Process: MAPK cascade (GO:0000165);; Biological Process: negative regulation of protein phosphorylation (GO:0001933);; Biological Process: positive regulation of protein phosphorylation (GO:0001934);; Biological Process: chondrocyte differentiation (GO:0002062);; Biological Process: hematopoietic progenitor cell differentiation (GO:0002244);; Molecular Function: antigen binding (GO:000…	K13375|4.8e-230|ssc:397078|K13375 transforming growth factor beta-1 | (RefSeq) TGFB1; transforming growth factor beta-1 precursor	MAPK signaling pathway (ko04010);; Cytokine-cytokine receptor interaction (ko04060);; FoxO signaling pathway (ko04068);; Cell cycle (ko04110);; Cellular senescence (ko04218);; TGF-beta signaling pathway (ko04350);; Osteoclast differentiation (ko04380);; Hippo signaling pathway (ko04390);; Th17 cell differentiation (ko04659);; Intestinal immune network for IgA production (ko04672);; Relaxin signal…	[T]	Signal transduction mechanisms	TGF-beta propeptide	Transforming growth factor beta-1 proprotein OS=Sus scrofa OX=9823 GN=TGFB1 PE=1 SV=2	T	Signal transduction mechanisms	RecName: Full=Transforming growth factor beta-1 proprotein; Contains: RecName: Full=Latency-associated peptide; Short=LAP; Contains: RecName: Full=Transforming growth factor beta-1; Short=TGF-beta-1; Flags: Precursor [Sus scrofa]	biological process: metabolic process (GO:0008152);; biological process: cellular process (GO:0009987);; biological process: signaling (GO:0023052);; biological process: single-organism process (GO:0044699);; biological process: response to stimulus (GO:0050896);; biological process: biological regulation (GO:0065007);; biological process: developmental process (GO:0032502);; molecular function: …
ENSSSCG00000003018	LIPE	37.5693	4784	37.3237	4532	37.6834	5665	35.7466	4566	20.1808	2684	18.472	2574	18.2136	2543	21.0958	2672	1.6934e-26	0.942012	up	[I]	Lipid transport and metabolism	Molecular Function: triglyceride lipase activity (GO:0004806);; Cellular Component: lipid droplet (GO:0005811);; Cellular Component: cytosol (GO:0005829);; Biological Process: cholesterol metabolic process (GO:0008203);; Molecular Function: serine hydrolase activity (GO:0017171);; Biological Process: triglyceride catabolic process (GO:0019433);; Molecular Function: protein kinase binding (GO:0019…	K07188|0.0e+00|ssc:397583|K07188 hormone-sensitive lipase [EC:3.1.1.79] | (RefSeq) LIPE; hormone-sensitive lipase	cAMP signaling pathway (ko04024);; AMPK signaling pathway (ko04152);; Apelin signaling pathway (ko04371);; Thermogenesis (ko04714);; Insulin signaling pathway (ko04910);; Regulation of lipolysis in adipocytes (ko04923);; Aldosterone synthesis and secretion (ko04925)	[I]	Lipid transport and metabolism	Hormone-sensitive lipase (HSL) N-terminus	Hormone-sensitive lipase OS=Sus scrofa OX=9823 GN=LIPE PE=2 SV=1	I	Lipid transport and metabolism	hormone-sensitive lipase isoform X1 [Vicugna pacos]	molecular function: catalytic activity (GO:0003824);; cellular component: cell (GO:0005623);; cellular component: organelle (GO:0043226);; cellular component: cell part (GO:0044464);; biological process: metabolic process (GO:0008152);; biological process: single-organism process (GO:0044699);; biological process: cellular process (GO:0009987);; molecular function: binding (GO:0005488)
ENSSSCG00000003022	TMEM145	1.69419	189	1.76995	182	2.42338	264	1.68569	182	0.63682	73	0.842682	100	0.706106	82	0.779932	82	1.81584e-09	1.32102	up	--	--	Biological Process: G-protein coupled receptor signaling pathway (GO:0007186);; Cellular Component: integral component of membrane (GO:0016021);; Biological Process: response to pheromone (GO:0019236);;	K07188|1.2e-135|pki:111854848|K07188 hormone-sensitive lipase [EC:3.1.1.79] | (RefSeq) tmem145; transmembrane protein 145	Apelin signaling pathway (ko04371);; Insulin signaling pathway (ko04910)	[S]	Function unknown	Rhodopsin-like GPCR transmembrane domain	--	--	--	transmembrane protein 145 isoform X4 [Phocoena sinus]	biological process: cellular process (GO:0009987);; biological process: signaling (GO:0023052);; biological process: single-organism process (GO:0044699);; biological process: response to stimulus (GO:0050896);; biological process: biological regulation (GO:0065007);; cellular component: membrane (GO:0016020);; cellular component: membrane part (GO:0044425)
ENSSSCG00000003088	APOE	478.126	74717	505.624	74239	451.317	69619	451.479	68958	306.129	50095	295.047	49843	285.926	46905	323.227	48201	4.72556e-18	0.602517	up	--	--	Molecular Function: amyloid-beta binding (GO:0001540);; Biological Process: negative regulation of endothelial cell proliferation (GO:0001937);; Biological Process: response to dietary excess (GO:0002021);; Molecular Function: phospholipid binding (GO:0005543);; Cellular Component: endoplasmic reticulum (GO:0005783);; Cellular Component: Golgi apparatus (GO:0005794);; Cellular Component: plasma m…	K04524|5.8e-87|ssc:397576|K04524 apolipoprotein E | (RefSeq) APOE; apolipoprotein E precursor	Cholesterol metabolism (ko04979);; Alzheimer disease (ko05010)	--	--	Apolipoprotein A1/A4/E domain	Apolipoprotein E OS=Sus scrofa OX=9823 GN=APOE PE=1 SV=2	T	Signal transduction mechanisms	apolipoprotein E precursor [Sus scrofa]	molecular function: binding (GO:0005488);; biological process: biological regulation (GO:0065007);; biological process: multicellular organismal process (GO:0032501);; biological process: single-organism process (GO:0044699);; biological process: response to stimulus (GO:0050896);; cellular component: cell (GO:0005623);; cellular component: organelle (GO:0043226);; cellular component: cell part (…
ENSSSCG00000003101	HIF3A	4.85344	1146	4.65307	1032	6.24767	1456	5.1759	1194	3.23482	800	2.86131	730	2.9973	743	3.06852	692	8.24872e-11	0.749209	up	--	--	Molecular Function: RNA polymerase II transcription factor activity, sequence-specific DNA binding (GO:0000981);; Biological Process: response to hypoxia (GO:0001666);; Molecular Function: DNA binding (GO:0003677);; Cellular Component: nucleus (GO:0005634);; Cellular Component: nucleoplasm (GO:0005654);; Cellular Component: transcription factor complex (GO:0005667);; Cellular Component: cytosol (…	K09096|0.0e+00|dle:111180713|K09096 hypoxia-inducible factor 3 alpha | (RefSeq) HIF3A; hypoxia-inducible factor 3-alpha isoform X1	--	[TK]	Signal transduction mechanisms;; Transcription	PAS fold	Hypoxia-inducible factor 1-alpha OS=Bos mutus grunniens OX=30521 GN=HIF1A PE=2 SV=1	K	Transcription	hypoxia-inducible factor 3-alpha isoform X5 [Sus scrofa]	molecular function: nucleic acid binding transcription factor activity (GO:0001071);; biological process: biological regulation (GO:0065007);; biological process: response to stimulus (GO:0050896);; molecular function: binding (GO:0005488);; cellular component: cell (GO:0005623);; cellular component: organelle (GO:0043226);; cellular component: cell part (GO:0044464);; cellular component: organel…
ENSSSCG00000003201	ATF5	18.2284	1436	18.9109	1400	15.8437	1232	19.4089	1494	27.8725	2299	26.2412	2235	24.2397	2004	27.8071	2090	4.79208e-11	-0.588828	down	--	--	Molecular Function: RNA polymerase II regulatory region sequence-specific DNA binding (GO:0000977);; Molecular Function: transcriptional activator activity, RNA polymerase II transcription regulatory region sequence-specific binding (GO:0001228);; Molecular Function: chromatin binding (GO:0003682);; Cellular Component: nucleoplasm (GO:0005654);; Cellular Component: transcription factor complex (G…	K09044|7.5e-108|ssc:100523675|K09044 activating transcription factor 5 | (RefSeq) ATF5; cyclic AMP-dependent transcription factor ATF-5	--	[K]	Transcription	bZIP transcription factor	--	K	Transcription	cyclic AMP-dependent transcription factor ATF-5 [Sus scrofa]	molecular function: binding (GO:0005488);; molecular function: nucleic acid binding transcription factor activity (GO:0001071);; biological process: biological regulation (GO:0065007);; cellular component: cell (GO:0005623);; cellular component: organelle (GO:0043226);; cellular component: organelle part (GO:0044422);; cellular component: cell part (GO:0044464);; cellular component: macromolecula…
ENSSSCG00000003231	NKG7	1.78491	94	4.49883	222	3.08092	160	2.42135	125	0.656755	37	0.896407	51	0.583746	33	1.385	70	2.30849e-07	1.68654	up	--	--	Cellular Component: plasma membrane (GO:0005886);; Cellular Component: integral component of membrane (GO:0016021);;	--	--	--	--	PMP-22/EMP/MP20/Claudin family	Protein NKG7 OS=Bos taurus OX=9913 GN=NKG7 PE=2 SV=1	S	Function unknown	protein NKG7 [Sus scrofa]	cellular component: cell (GO:0005623);; cellular component: membrane (GO:0016020);; cellular component: cell part (GO:0044464);; cellular component: membrane part (GO:0044425)
ENSSSCG00000003241	ZNF614	0.456359	52	0.696226	75	0.668183	75	0.573223	64	0.475667	57	0.35506	44	0.184727	22	0.337015	37	0.00782963	0.78274	up	--	--	Molecular Function: transcription factor activity, sequence-specific DNA binding (GO:0003700);; Cellular Component: nucleus (GO:0005634);; Molecular Function: sequence-specific DNA binding (GO:0043565);; Molecular Function: metal ion binding (GO:0046872);;	K09228|5.8e-163|ssc:100516977|K09228 KRAB domain-containing zinc finger protein | (RefSeq) ZNF614; zinc finger protein 614 isoform X1	Herpes simplex virus 1 infection (ko05168)	[R]	General function prediction only	Zinc-finger double domain	Zinc finger protein 614 OS=Pongo abelii OX=9601 GN=ZNF614 PE=2 SV=1	K	Transcription	zinc finger protein 614 isoform X1 [Sus scrofa]	molecular function: nucleic acid binding transcription factor activity (GO:0001071);; biological process: biological regulation (GO:0065007);; cellular component: cell (GO:0005623);; cellular component: organelle (GO:0043226);; cellular component: cell part (GO:0044464);; molecular function: binding (GO:0005488)
ENSSSCG00000003259	OSCAR	0.505761	72	0.634797	93	0.382902	55	0.506359	74	0.150141	23	0.119041	22	0.111213	18	0.126639	18	3.91383e-11	1.90155	up	--	--	--	--	--	--	--	--	--	--	--	osteoclast associated Ig-like receptor [Pipistrellus kuhlii]	--
ENSSSCG00000003278	ENSSSCG00000003278	1.98221	219	2.42444	232	1.86974	223	1.50134	153	0.362108	32	0.676186	94	0.761317	82	0.890474	93	6.58636e-07	1.4883	up	--	--	Cellular Component: integral component of membrane (GO:0016021);;	K06512|3.2e-73|epz:103554733|K06512 leukocyte immunoglobulin-like receptor | (RefSeq) uncharacterized LOC103554733	Osteoclast differentiation (ko04380);; B cell receptor signaling pathway (ko04662)	--	--	Immunoglobulin domain	Venom metalloproteinase inhibitor DM43 OS=Didelphis marsupialis OX=9268 PE=1 SV=2	T	Signal transduction mechanisms	leukocyte immunoglobulin-like receptor subfamily B member 3-like isoform 2 precursor [Sus scrofa]	cellular component: membrane (GO:0016020);; cellular component: membrane part (GO:0044425)
ENSSSCG00000003333	C1QTNF12	1.8932	101	1.216	61	1.0852	57	2.18267	113	0.641819	36	0.87039	50	0.800891	45	0.384289	20	0.00012735	1.19002	up	--	--	Molecular Function: hormone activity (GO:0005179);; Cellular Component: extracellular space (GO:0005615);; Biological Process: regulation of glucose metabolic process (GO:0010906);; Biological Process: positive regulation of insulin secretion involved in cellular response to glucose stimulus (GO:0035774);; Biological Process: negative regulation of gluconeogenesis (GO:0045721);; Biological Proces…	K21410|1.3e-161|ssc:100523314|K21410 adipolin | (RefSeq) C1QTNF12; adipolin isoform X2	--	--	--	--	--	S	Function unknown	adipolin isoform X2 [Sus scrofa]	molecular function: binding (GO:0005488);; cellular component: extracellular region (GO:0005576);; cellular component: extracellular region part (GO:0044421);; biological process: biological regulation (GO:0065007)
ENSSSCG00000003524	C1QA	15.6766	1526	18.8562	1725	10.1354	974	15.7187	1496	3.51247	358	4.35363	459	5.26717	539	5.20173	484	5.03728e-23	1.67619	up	--	--	Biological Process: microglial cell activation (GO:0001774);; Cellular Component: extracellular region (GO:0005576);; Cellular Component: collagen trimer (GO:0005581);; Cellular Component: cell (GO:0005623);; Biological Process: complement activation, classical pathway (GO:0006958);; Biological Process: aging (GO:0007568);; Biological Process: neuron remodeling (GO:0016322);; Biological Process: …	K03986|3.4e-78|ssc:445461|K03986 complement C1q subcomponent subunit A | (RefSeq) C1QA; complement C1q subcomponent subunit A precursor	Complement and coagulation cascades (ko04610);; Prion disease (ko05020);; Pertussis (ko05133);; Chagas disease (ko05142);; Staphylococcus aureus infection (ko05150);; Systemic lupus erythematosus (ko05322)	--	--	C1q domain	Complement C1q subcomponent subunit A OS=Sus scrofa OX=9823 GN=C1QA PE=2 SV=1	W	Extracellular structures	complement C1q subcomponent subunit A precursor [Sus scrofa]	biological process: immune system process (GO:0002376);; biological process: cellular process (GO:0009987);; biological process: single-organism process (GO:0044699);; cellular component: extracellular region (GO:0005576);; cellular component: macromolecular complex (GO:0032991);; cellular component: cell (GO:0005623);; biological process: metabolic process (GO:0008152);; biological process: resp…
ENSSSCG00000003558	RPS6KA1	4.55773	669	5.53391	765	4.71712	686	4.28152	614	3.57631	544	3.21453	503	2.79213	424	2.6806	370	4.82823e-06	0.62172	up	[D]	Cell cycle control, cell division, chromosome partitioning	Molecular Function: magnesium ion binding (GO:0000287);; Molecular Function: protein serine/threonine kinase activity (GO:0004674);; Molecular Function: ATP binding (GO:0005524);; Biological Process: intracellular signal transduction (GO:0035556);;	K04373|0.0e+00|cfr:102517811|K04373 ribosomal protein S6 kinase alpha-1/2/3/6 [EC:2.7.11.1] | (RefSeq) RPS6KA1; ribosomal protein S6 kinase alpha-1 isoform X1	MAPK signaling pathway (ko04010);; Oocyte meiosis (ko04114);; mTOR signaling pathway (ko04150);; Thermogenesis (ko04714);; Long-term potentiation (ko04720);; Neurotrophin signaling pathway (ko04722);; Progesterone-mediated oocyte maturation (ko04914);; Insulin resistance (ko04931);; Yersinia infection (ko05135)	[T]	Signal transduction mechanisms	Protein kinase domain	Ribosomal protein S6 kinase alpha-5 OS=Pongo abelii OX=9601 GN=RPS6KA5 PE=2 SV=1	T	Signal transduction mechanisms	ribosomal protein S6 kinase alpha-1 isoform X2 [Sus scrofa]	molecular function: binding (GO:0005488);; molecular function: catalytic activity (GO:0003824);; biological process: metabolic process (GO:0008152);; biological process: cellular process (GO:0009987);; biological process: signaling (GO:0023052);; biological process: single-organism process (GO:0044699);; biological process: response to stimulus (GO:0050896);; biological process: biological regula…
ENSSSCG00000003582	SMPDL3B	1.61415	146	2.15871	183	2.02448	180	1.72983	152	0.555552	50	1.42683	127	1.04639	100	1.01417	81	0.000377158	0.931931	up	--	--	Cellular Component: extracellular space (GO:0005615);; Cellular Component: plasma membrane (GO:0005886);; Molecular Function: phosphoric diester hydrolase activity (GO:0008081);; Molecular Function: zinc ion binding (GO:0008270);; Biological Process: negative regulation of toll-like receptor signaling pathway (GO:0034122);; Biological Process: membrane lipid catabolic process (GO:0046466);; Biolo…	K01128|1.4e-232|ssc:100514109|K01128 sphingomyelin phosphodiesterase acid-like 3 [EC:3.1.4.-] | (RefSeq) SMPDL3B; LOW QUALITY PROTEIN: acid sphingomyelinase-like phosphodiesterase 3b	--	[I]	Lipid transport and metabolism	Calcineurin-like phosphoesterase	Acid sphingomyelinase-like phosphodiesterase 3a OS=Bos taurus OX=9913 GN=SMPDL3A PE=2 SV=1	I	Lipid transport and metabolism	LOW QUALITY PROTEIN: acid sphingomyelinase-like phosphodiesterase 3b [Sus scrofa]	cellular component: extracellular region (GO:0005576);; cellular component: extracellular region part (GO:0044421);; cellular component: cell (GO:0005623);; cellular component: membrane (GO:0016020);; cellular component: cell part (GO:0044464);; molecular function: catalytic activity (GO:0003824);; molecular function: binding (GO:0005488);; biological process: biological regulation (GO:0065007);;…
ENSSSCG00000003584	THEMIS2	0.319092	72	0.549335	88	0.22969	57	0.525488	102	0.291813	44	0.206802	37	0.258732	36	0.103382	27	1.16628e-05	1.19902	up	--	--	Cellular Component: nucleus (GO:0005634);; Cellular Component: cytoplasm (GO:0005737);; Biological Process: T cell receptor signaling pathway (GO:0050852);;	--	--	--	--	Cell-cycle sustaining, positive selection,	Protein THEMIS OS=Bos taurus OX=9913 GN=THEMIS PE=2 SV=1	S	Function unknown	protein THEMIS2 [Sus scrofa]	cellular component: cell (GO:0005623);; cellular component: organelle (GO:0043226);; cellular component: cell part (GO:0044464);; biological process: immune system process (GO:0002376);; biological process: cellular process (GO:0009987);; biological process: signaling (GO:0023052);; biological process: single-organism process (GO:0044699);; biological process: response to stimulus (GO:0050896);; …
ENSSSCG00000003697	NDC80	1.15052	183	1.17511	144	1.15126	175	1.03814	174	3.47187	560	1.70259	316	1.8618	347	1.41084	214	1.30125e-05	-1.02906	down	--	--	Cellular Component: Ndc80 complex (GO:0031262);; Biological Process: attachment of mitotic spindle microtubules to kinetochore (GO:0051315);;	K11547|0.0e+00|ssc:100626545|K11547 kinetochore protein NDC80 | (RefSeq) NDC80; kinetochore protein NDC80 homolog	--	[D]	Cell cycle control, cell division, chromosome partitioning	HEC/Ndc80p family	Kinetochore protein NDC80 homolog OS=Macaca fascicularis OX=9541 GN=NDC80 PE=2 SV=1	D	Cell cycle control, cell division, chromosome partitioning	kinetochore protein NDC80 homolog [Sus scrofa]	cellular component: cell (GO:0005623);; cellular component: macromolecular complex (GO:0032991);; cellular component: organelle (GO:0043226);; cellular component: organelle part (GO:0044422);; cellular component: cell part (GO:0044464);; biological process: cellular process (GO:0009987);; biological process: single-organism process (GO:0044699)
ENSSSCG00000003711	CABYR	0.493412	115	0.975009	142	0.958945	230	0.70681	118	0.578222	110	0.299232	88	0.306541	82	0.322188	61	0.000953269	0.882397	up	--	--	Molecular Function: calcium ion binding (GO:0005509);; Biological Process: sperm capacitation (GO:0048240);;	--	--	--	--	Regulatory subunit of type II PKA R-subunit	Calcium-binding tyrosine phosphorylation-regulated protein OS=Vulpes vulpes OX=9627 GN=CABYR PE=1 SV=1	S	Function unknown	calcium-binding tyrosine phosphorylation-regulated protein isoform 1 [Sus scrofa]	molecular function: binding (GO:0005488);; biological process: reproduction (GO:0000003);; biological process: cellular process (GO:0009987);; biological process: reproductive process (GO:0022414);; biological process: multicellular organismal process (GO:0032501);; biological process: developmental process (GO:0032502);; biological process: single-organism process (GO:0044699)
ENSSSCG00000003805	PDE4B	13.217	2515	9.27524	2185	11.1457	2607	13.559	2568	6.04824	1255	6.67768	1382	4.20387	1416	4.54956	1153	1.35035e-28	0.970254	up	--	--	Molecular Function: 3',5'-cyclic-AMP phosphodiesterase activity (GO:0004115);; Biological Process: cAMP catabolic process (GO:0006198);; Biological Process: signal transduction (GO:0007165);; Molecular Function: metal ion binding (GO:0046872);;	K13293|0.0e+00|ecb:100053961|K13293 cAMP-specific phosphodiesterase 4 [EC:3.1.4.53] | (RefSeq) PDE4B; cAMP-specific 3',5'-cyclic phosphodiesterase 4B isoform X2	Purine metabolism (ko00230);; cAMP signaling pathway (ko04024);; Parathyroid hormone synthesis, secretion and action (ko04928);; Morphine addiction (ko05032)	[T]	Signal transduction mechanisms	3'5'-cyclic nucleotide phosphodiesterase	Calcium/calmodulin-dependent 3',5'-cyclic nucleotide phosphodiesterase 1B OS=Bos taurus OX=9913 GN=PDE1B PE=1 SV=1	T	Signal transduction mechanisms	cAMP-specific 3',5'-cyclic phosphodiesterase 4B isoform X1 [Sus scrofa]	molecular function: catalytic activity (GO:0003824);; biological process: metabolic process (GO:0008152);; biological process: cellular process (GO:0009987);; biological process: single-organism process (GO:0044699);; biological process: biological regulation (GO:0065007);; molecular function: binding (GO:0005488)
ENSSSCG00000003812	PGM1	18.7176	2323	20.5452	2396	42.7423	5236	17.1503	2080	16.4841	2142	14.0178	1881	14.0417	1829	13.7511	1629	0.000644659	0.73549	up	[G]	Carbohydrate transport and metabolism	Molecular Function: magnesium ion binding (GO:0000287);; Molecular Function: phosphoglucomutase activity (GO:0004614);; Cellular Component: cytosol (GO:0005829);; Biological Process: carbohydrate metabolic process (GO:0005975);;	K01835|0.0e+00|bta:534402|K01835 phosphoglucomutase [EC:5.4.2.2] | (RefSeq) PGM1; phosphoglucomutase-1	Glycolysis / Gluconeogenesis (ko00010);; Pentose phosphate pathway (ko00030);; Galactose metabolism (ko00052);; Purine metabolism (ko00230);; Starch and sucrose metabolism (ko00500);; Amino sugar and nucleotide sugar metabolism (ko00520)	[G]	Carbohydrate transport and metabolism	Phosphoglucomutase/phosphomannomutase, alpha/beta/alpha domain I	Phosphoglucomutase-1 OS=Bos taurus OX=9913 GN=PGM1 PE=2 SV=1	G	Carbohydrate transport and metabolism	phosphoglucomutase-1 isoform X2 [Sus scrofa]	molecular function: binding (GO:0005488);; molecular function: catalytic activity (GO:0003824);; cellular component: cell (GO:0005623);; cellular component: cell part (GO:0044464);; biological process: metabolic process (GO:0008152)
ENSSSCG00000003909	ENSSSCG00000003909	0.385348	99	0.293592	70	0.403599	101	0.421551	101	0.434415	117	0.706848	195	0.476166	128	0.645169	158	0.00628361	-0.647559	down	--	--	Molecular Function: phosphotyrosine residue binding (GO:0001784);; Biological Process: positive regulation of protein phosphorylation (GO:0001934);; Biological Process: cell migration involved in sprouting angiogenesis (GO:0002042);; Cellular Component: phosphatidylinositol 3-kinase complex (GO:0005942);; Biological Process: insulin receptor signaling pathway (GO:0008286);; Biological Process: po…	K02649|1.1e-246|ssc:100511937|K02649 phosphoinositide-3-kinase regulatory subunit alpha/beta/delta | (RefSeq) phosphatidylinositol 3-kinase regulatory subunit gamma isoform X1	EGFR tyrosine kinase inhibitor resistance (ko01521);; Endocrine resistance (ko01522);; Platinum drug resistance (ko01524);; ErbB signaling pathway (ko04012);; Ras signaling pathway (ko04014);; Rap1 signaling pathway (ko04015);; cAMP signaling pathway (ko04024);; Chemokine signaling pathway (ko04062);; HIF-1 signaling pathway (ko04066);; FoxO signaling pathway (ko04068);; Phosphatidylinositol sign…	[T]	Signal transduction mechanisms	Phosphatidylinositol 3-kinase regulatory subunit P85 inter-SH2 domain	Phosphatidylinositol 3-kinase regulatory subunit gamma OS=Bos taurus OX=9913 GN=PIK3R3 PE=2 SV=1	T	Signal transduction mechanisms	phosphatidylinositol 3-kinase regulatory subunit gamma isoform X1 [Sus scrofa]	molecular function: binding (GO:0005488);; biological process: biological regulation (GO:0065007);; biological process: cellular process (GO:0009987);; biological process: multicellular organismal process (GO:0032501);; biological process: locomotion (GO:0040011);; biological process: single-organism process (GO:0044699);; biological process: localization (GO:0051179);; cellular component: membra…
ENSSSCG00000003917	TESK2	0.94031	134	1.24086	166	1.10091	155	1.11298	155	0.602139	90	0.432955	74	0.794237	119	0.861674	117	0.00533637	0.646664	up	[R]	General function prediction only	Molecular Function: protein kinase activity (GO:0004672);; Molecular Function: ATP binding (GO:0005524);;	K08842|1.2e-311|ssc:100513361|K08842 testis-specific kinase 2 [EC:2.7.12.1] | (RefSeq) TESK2; dual specificity testis-specific protein kinase 2	--	--	--	Protein tyrosine and serine/threonine kinase	LIM domain kinase 2 OS=Bos taurus OX=9913 GN=LIMK2 PE=2 SV=1	T	Signal transduction mechanisms	dual specificity testis-specific protein kinase 2 [Sus scrofa]	molecular function: catalytic activity (GO:0003824);; biological process: metabolic process (GO:0008152);; biological process: cellular process (GO:0009987);; molecular function: binding (GO:0005488)
ENSSSCG00000003931	KIF2C	2.37034	305	1.67388	201	1.79789	229	1.59907	197	5.05795	670	2.58293	359	3.0374	409	1.80974	222	0.0019224	-0.776476	down	--	--	Cellular Component: kinetochore (GO:0000776);; Molecular Function: microtubule motor activity (GO:0003777);; Molecular Function: ATP binding (GO:0005524);; Biological Process: microtubule-based movement (GO:0007018);; Biological Process: microtubule depolymerization (GO:0007019);; Biological Process: establishment or maintenance of microtubule cytoskeleton polarity (GO:0030951);; Cellular Compone…	K10393|0.0e+00|ssc:100516205|K10393 kinesin family member 2/24 | (RefSeq) KIF2C; kinesin-like protein KIF2C isoform X1	--	[Z]	Cytoskeleton	Kinesin motor domain	Kinesin-like protein KIF2C OS=Macaca fascicularis OX=9541 GN=KIF2C PE=2 SV=1	Z	Cytoskeleton	kinesin-like protein KIF2C isoform X1 [Sus scrofa]	cellular component: cell (GO:0005623);; cellular component: macromolecular complex (GO:0032991);; cellular component: organelle (GO:0043226);; cellular component: organelle part (GO:0044422);; cellular component: cell part (GO:0044464);; molecular function: catalytic activity (GO:0003824);; molecular function: binding (GO:0005488);; biological process: cellular process (GO:0009987);; biological p…
ENSSSCG00000003949	CDC20	7.16774	544	5.3039	379	7.62131	571	5.42358	403	18.6168	1479	10.4344	865	10.1379	808	5.62375	408	0.000765122	-0.845257	down	[R]	General function prediction only	Molecular Function: anaphase-promoting complex binding (GO:0010997);; Molecular Function: ubiquitin-protein transferase activator activity (GO:0097027);; Biological Process: positive regulation of ubiquitin protein ligase activity (GO:1904668);;	K03363|3.6e-227|ssc:397379|K03363 cell division cycle 20, cofactor of APC complex | (RefSeq) CDC20; cell division cycle protein 20 homolog	Cell cycle (ko04110);; Oocyte meiosis (ko04114);; Ubiquitin mediated proteolysis (ko04120);; Human T-cell leukemia virus 1 infection (ko05166);; Viral carcinogenesis (ko05203)	[DO]	Cell cycle control, cell division, chromosome partitioning;; Posttranslational modification, protein turnover, chaperones	Anaphase-promoting complex subunit 4 WD40 domain	Cell division cycle protein 20 homolog OS=Sus scrofa OX=9823 GN=CDC20 PE=2 SV=1	--	--	cell division cycle protein 20 homolog isoform X2 [Sus scrofa]	molecular function: binding (GO:0005488);; molecular function: molecular function regulator (GO:0098772);; biological process: biological regulation (GO:0065007)
ENSSSCG00000003975	KCNQ4	0.701962	127	0.766813	127	0.945719	166	0.641261	113	0.2221	42	0.51209	100	0.539185	102	0.391345	68	0.00290902	0.817812	up	[T]	Signal transduction mechanisms	Molecular Function: voltage-gated potassium channel activity (GO:0005249);; Molecular Function: delayed rectifier potassium channel activity (GO:0005251);; Molecular Function: calmodulin binding (GO:0005516);; Biological Process: sensory perception of sound (GO:0007605);; Cellular Component: voltage-gated potassium channel complex (GO:0008076);; Cellular Component: integral component of membrane …	K04929|0.0e+00|ssc:100526228|K04929 potassium voltage-gated channel KQT-like subfamily member 4 | (RefSeq) KCNQ4; potassium voltage-gated channel subfamily KQT member 4 isoform X2	Cholinergic synapse (ko04725)	[P]	Inorganic ion transport and metabolism	KCNQ voltage-gated potassium channel	Potassium voltage-gated channel subfamily KQT member 3 OS=Bos taurus OX=9913 GN=KCNQ3 PE=2 SV=1	P	Inorganic ion transport and metabolism	potassium voltage-gated channel subfamily KQT member 4 isoform X2 [Sus scrofa]	molecular function: transporter activity (GO:0005215);; biological process: cellular process (GO:0009987);; biological process: single-organism process (GO:0044699);; biological process: localization (GO:0051179);; biological process: biological regulation (GO:0065007);; molecular function: binding (GO:0005488);; biological process: multicellular organismal process (GO:0032501);; cellular compone…
ENSSSCG00000004164	MTFR2	0.384672	79	0.281684	55	0.197618	40	0.319412	64	0.89466	192	0.477436	106	0.53228	115	0.346381	68	0.00135897	-0.957817	down	--	--	Biological Process: mitochondrial fission (GO:0000266);; Cellular Component: mitochondrion (GO:0005739);; Biological Process: aerobic respiration (GO:0009060);;	--	--	--	--	Mitochondrial fission regulator	Mitochondrial fission regulator 2 OS=Bos taurus OX=9913 GN=MTFR2 PE=2 SV=1	S	Function unknown	mitochondrial fission regulator 2 isoform X1 [Sus scrofa]	biological process: cellular process (GO:0009987);; biological process: cellular component organization or biogenesis (GO:0071840);; cellular component: cell (GO:0005623);; cellular component: organelle (GO:0043226);; cellular component: cell part (GO:0044464);; biological process: metabolic process (GO:0008152);; biological process: single-organism process (GO:0044699)
ENSSSCG00000004170	ENSSSCG00000004170	5.59053	1097	5.80788	1071	5.01166	971	5.2416	1005	9.39176	1929	8.21489	1742	8.2328	1695	6.40165	1199	1.51756e-08	-0.610686	down	--	--	Biological Process: gamete generation (GO:0007276);;	--	--	--	--	Spin/Ssty Family	Spindlin-1 OS=Pongo abelii OX=9601 GN=SPIN1 PE=2 SV=1	K	Transcription	spindlin-1 [Sus scrofa]	biological process: reproduction (GO:0000003);; biological process: reproductive process (GO:0022414);; biological process: multicellular organismal process (GO:0032501);; biological process: single-organism process (GO:0044699)
ENSSSCG00000004195	ARG1	2.19708	205	2.4533	229	2.02611	187	1.97395	191	0.304809	36	0.94962	112	1.11493	110	0.766975	69	2.90612e-06	1.35836	up	[E]	Amino acid transport and metabolism	Biological Process: urea cycle (GO:0000050);; Molecular Function: arginase activity (GO:0004053);; Biological Process: arginine metabolic process (GO:0006525);; Molecular Function: metal ion binding (GO:0046872);;	K01476|4.8e-178|ssc:397115|K01476 arginase [EC:3.5.3.1] | (RefSeq) ARG1; arginase-1	Arginine biosynthesis (ko00220);; Arginine and proline metabolism (ko00330);; Biosynthesis of amino acids (ko01230);; Amoebiasis (ko05146)	[E]	Amino acid transport and metabolism	Arginase family	Arginase-1 OS=Sus scrofa OX=9823 GN=ARG1 PE=2 SV=1	E	Amino acid transport and metabolism	arginase-1 [Sus scrofa]	biological process: metabolic process (GO:0008152);; biological process: cellular process (GO:0009987);; biological process: single-organism process (GO:0044699);; molecular function: catalytic activity (GO:0003824);; molecular function: binding (GO:0005488)
ENSSSCG00000004201	TMEM200A	6.59311	1252	7.67675	1370	7.50549	1407	8.7199	1619	10.7168	2131	11.1321	2285	12.3897	2470	12.4227	2251	3.06491e-10	-0.648127	down	--	--	Cellular Component: integral component of membrane (GO:0016021);;	--	--	[S]	Function unknown	Uncharacterised conserved protein (DUF2371)	--	S	Function unknown	transmembrane protein 200A [Sus scrofa]	cellular component: membrane (GO:0016020);; cellular component: membrane part (GO:0044425)
ENSSSCG00000004205	ARHGAP18	6.47066	1118	6.41689	1099	5.98406	1067	5.1802	955	3.92759	756	3.85857	719	3.76352	747	4.14745	641	9.06298e-10	0.611604	up	--	--	Biological Process: signal transduction (GO:0007165);;	K20639|5.2e-291|ssc:100525547|K20639 Rho GTPase-activating protein 18/28/40 | (RefSeq) ARHGAP18; rho GTPase-activating protein 18 isoform X1	--	[T]	Signal transduction mechanisms	RhoGAP domain	Active breakpoint cluster region-related protein OS=Bos taurus OX=9913 GN=ABR PE=2 SV=1	T	Signal transduction mechanisms	rho GTPase-activating protein 18 isoform X2 [Sus scrofa]	biological process: cellular process (GO:0009987);; biological process: biological regulation (GO:0065007)
ENSSSCG00000004218	RSPO3	1.19075	133	1.19979	126	1.3608	150	0.831097	91	0.483418	57	0.620454	75	0.478334	56	0.93705	100	0.00185351	0.82273	up	--	--	Biological Process: positive regulation of Wnt signaling pathway (GO:0030177);;	K23098|5.0e-149|ssc:100155208|K23098 R-spondin 3 | (RefSeq) RSPO3; R-spondin-3 precursor	Wnt signaling pathway (ko04310)	[O]	Posttranslational modification, protein turnover, chaperones	Furin-like repeat, cysteine-rich	R-spondin-3 OS=Bos taurus OX=9913 GN=RSPO3 PE=2 SV=1	T	Signal transduction mechanisms	R-spondin-3 precursor [Sus scrofa]	biological process: biological regulation (GO:0065007)
ENSSSCG00000004236	PKIB	0.877857	82	0.527872	47	0.866499	80	1.24178	114	0.385234	38	0.759418	77	0.394633	39	0.297325	27	0.00681768	0.893263	up	--	--	Molecular Function: cAMP-dependent protein kinase inhibitor activity (GO:0004862);;	--	--	--	--	cAMP-dependent protein kinase inhibitor	--	T	Signal transduction mechanisms	cAMP-dependent protein kinase inhibitor beta isoform X1 [Sus scrofa]	molecular function: molecular function regulator (GO:0098772);; biological process: biological regulation (GO:0065007)
ENSSSCG00000004250	SLC35F1	0.240197	45	0.31093	55	0.247996	46	0.407968	75	0.670752	132	0.406472	83	0.92634	182	0.47509	85	0.000285298	-1.06677	down	--	--	Cellular Component: integral component of membrane (GO:0016021);; Molecular Function: transmembrane transporter activity (GO:0022857);;	K15287|4.7e-192|ssc:100522582|K15287 solute carrier family 35, member F1/2 | (RefSeq) SLC35F1; solute carrier family 35 member F1	--	[S]	Function unknown	Solute carrier family 35	--	--	--	solute carrier family 35 member F1 [Sus scrofa]	cellular component: membrane (GO:0016020);; cellular component: membrane part (GO:0044425);; molecular function: transporter activity (GO:0005215);; biological process: localization (GO:0051179)
ENSSSCG00000004279	OGFRL1	4.32992	1431	4.38999	1382	4.063	1361	4.44866	1442	2.67867	947	2.25594	837	2.56719	920	2.94648	888	2.89634e-13	0.687872	up	--	--	Molecular Function: opioid receptor activity (GO:0004985);; Cellular Component: membrane (GO:0016020);;	--	--	--	--	Opioid growth factor receptor (OGFr) conserved region	--	O	Posttranslational modification, protein turnover, chaperones	opioid growth factor receptor-like protein 1 isoform X1 [Sus scrofa]	molecular function: signal transducer activity (GO:0004871);; molecular function: molecular transducer activity (GO:0060089);; biological process: cellular process (GO:0009987);; biological process: signaling (GO:0023052);; biological process: single-organism process (GO:0044699);; biological process: response to stimulus (GO:0050896);; biological process: biological regulation (GO:0065007);; cel…
ENSSSCG00000004366	BVES	0.668064	145	0.476994	102	0.315366	66	0.455432	101	0.811705	188	0.697732	171	0.559911	127	0.865771	177	0.00948781	-0.64362	down	--	--	Biological Process: positive regulation of receptor recycling (GO:0001921);; Biological Process: regulation of heart rate (GO:0002027);; Biological Process: hematopoietic progenitor cell differentiation (GO:0002244);; Biological Process: response to ischemia (GO:0002931);; Molecular Function: structural molecule activity (GO:0005198);; Cellular Component: caveola (GO:0005901);; Cellular Component…	K21108|3.4e-206|ssc:100153106|K21108 blood vessel epicardial substance | (RefSeq) BVES; blood vessel epicardial substance	Tight junction (ko04530)	--	--	Popeye protein conserved region	Blood vessel epicardial substance OS=Sus scrofa OX=9823 GN=BVES PE=2 SV=1	T	Signal transduction mechanisms	blood vessel epicardial substance isoform X1 [Sus scrofa]	biological process: biological regulation (GO:0065007);; biological process: cellular process (GO:0009987);; biological process: developmental process (GO:0032502);; biological process: single-organism process (GO:0044699);; biological process: response to stimulus (GO:0050896);; molecular function: structural molecule activity (GO:0005198);; cellular component: cell (GO:0005623);; cellular compo…
ENSSSCG00000004371	CRYBG1	2.00472	755	1.7352	614	1.76289	656	2.0094	740	2.87921	1136	2.77549	1131	3.0511	1206	2.72502	980	1.08013e-09	-0.641452	down	--	--	--	K23483|1.2e-40|els:105023160|K23483 gamma-crystallin | (RefSeq) gamma-crystallin M2	--	--	--	Beta/Gamma crystallin	Beta-crystallin B1 OS=Sus scrofa OX=9823 GN=CRYBB1 PE=2 SV=1	S	Function unknown	absent in melanoma 1 protein isoform X1 [Sus scrofa]	--
ENSSSCG00000004454	ME1	113.825	14850	81.0393	14743	125.401	16948	110.932	14133	30.3145	6120	40.9992	6153	43.1033	6159	51.3004	6481	4.81128e-55	1.32501	up	[C]	Energy production and conversion	Molecular Function: malate dehydrogenase (decarboxylating) (NAD+) activity (GO:0004471);; Molecular Function: metal ion binding (GO:0046872);; Molecular Function: NAD binding (GO:0051287);;	K00029|0.0e+00|ssc:397538|K00029 malate dehydrogenase (oxaloacetate-decarboxylating)(NADP+) [EC:1.1.1.40] | (RefSeq) ME1; NADP-dependent malic enzyme	Pyruvate metabolism (ko00620);; Carbon metabolism (ko01200);; PPAR signaling pathway (ko03320)	[C]	Energy production and conversion	Malic enzyme, NAD binding domain	NADP-dependent malic enzyme (Fragment) OS=Sus scrofa OX=9823 GN=ME1 PE=2 SV=1	C	Energy production and conversion	NADP-dependent malic enzyme [Sus scrofa]	molecular function: catalytic activity (GO:0003824);; biological process: metabolic process (GO:0008152);; biological process: single-organism process (GO:0044699);; molecular function: binding (GO:0005488)
ENSSSCG00000004466	TTK	1.19833	247	0.791314	144	1.0324	206	0.916886	185	3.47639	713	1.88685	420	1.80484	390	0.883174	174	0.000302824	-1.05417	down	[NW]	Cell motility;; Extracellular structures	Cellular Component: kinetochore (GO:0000776);; Molecular Function: protein serine/threonine kinase activity (GO:0004674);; Molecular Function: protein serine/threonine/tyrosine kinase activity (GO:0004712);; Molecular Function: ATP binding (GO:0005524);; Cellular Component: nucleus (GO:0005634);; Cellular Component: spindle (GO:0005819);; Biological Process: chromosome segregation (GO:0007059);; …	K08866|0.0e+00|ssc:100157649|K08866 serine/threonine-protein kinase TTK/MPS1 [EC:2.7.12.1] | (RefSeq) TTK; dual specificity protein kinase TTK isoform X1	Cell cycle (ko04110)	[D]	Cell cycle control, cell division, chromosome partitioning	Protein kinase domain	Dual specificity protein kinase TTK OS=Macaca fascicularis OX=9541 GN=TTK PE=2 SV=1	T	Signal transduction mechanisms	dual specificity protein kinase TTK isoform X1 [Sus scrofa]	cellular component: cell (GO:0005623);; cellular component: macromolecular complex (GO:0032991);; cellular component: organelle (GO:0043226);; cellular component: organelle part (GO:0044422);; cellular component: cell part (GO:0044464);; molecular function: catalytic activity (GO:0003824);; biological process: metabolic process (GO:0008152);; biological process: cellular process (GO:0009987);; mo…
ENSSSCG00000004554	PCLAF	2.40427	329	2.25698	290	2.0914	281	2.14257	287	5.5873	755	3.74989	555	4.36646	606	2.44124	307	1.70935e-05	-0.845646	down	--	--	Biological Process: cellular response to DNA damage stimulus (GO:0006974);; Biological Process: regulation of cell cycle (GO:0051726);;	--	--	--	--	PCNA-associated factor histone like domain	PCNA-associated factor OS=Bos taurus OX=9913 GN=PCLAF PE=3 SV=1	S	Function unknown	PCNA-associated factor [Sus scrofa]	biological process: cellular process (GO:0009987);; biological process: response to stimulus (GO:0050896);; biological process: biological regulation (GO:0065007)
ENSSSCG00000004572	ENSSSCG00000004572	1.50491	103	1.06474	69	1.13244	77	1.27913	86	0.446616	32	0.448027	33	1.2867	92	0.327168	22	0.00751885	0.954611	up	--	--	Molecular Function: molecular_function (GO:0003674);; Molecular Function: binding (GO:0005488);; Molecular Function: calcium ion binding (GO:0005509);; Molecular Function: phospholipid binding (GO:0005543);; Molecular Function: calcium-dependent phospholipid binding (GO:0005544);; Cellular Component: cellular_component (GO:0005575);; Cellular Component: cell (GO:0005623);; Cellular Component: pla…	--	--	--	--	--	C2 calcium-dependent domain-containing protein 4A OS=Bos taurus OX=9913 GN=C2CD4A PE=2 SV=1	S	Function unknown	C2 calcium-dependent domain-containing protein 4B [Sus scrofa]	molecular function: binding (GO:0005488);; cellular component: cell (GO:0005623);; cellular component: membrane (GO:0016020);; cellular component: cell part (GO:0044464)
ENSSSCG00000004588	CCNB2	1.39073	126	2.25509	192	1.85873	166	1.43471	127	5.0953	483	3.52251	345	3.32021	315	1.98968	172	5.26605e-05	-1.03917	down	--	--	Biological Process: regulation of cyclin-dependent protein serine/threonine kinase activity (GO:0000079);; Cellular Component: cyclin-dependent protein kinase holoenzyme complex (GO:0000307);; Biological Process: in utero embryonic development (GO:0001701);; Cellular Component: nucleus (GO:0005634);; Cellular Component: cytoplasm (GO:0005737);; Cellular Component: centrosome (GO:0005813);; Cellul…	K21770|4.9e-222|ssc:100135668|K21770 G2/mitotic-specific cyclin-B2 | (RefSeq) CCNB2; G2/mitotic-specific cyclin-B2	FoxO signaling pathway (ko04068);; Cell cycle (ko04110);; Oocyte meiosis (ko04114);; p53 signaling pathway (ko04115);; Cellular senescence (ko04218);; Progesterone-mediated oocyte maturation (ko04914);; Human T-cell leukemia virus 1 infection (ko05166);; Human immunodeficiency virus 1 infection (ko05170)	[D]	Cell cycle control, cell division, chromosome partitioning	Cyclin, N-terminal domain	G2/mitotic-specific cyclin-B2 OS=Macaca fascicularis OX=9541 GN=CCNB2 PE=2 SV=1	D	Cell cycle control, cell division, chromosome partitioning	G2/mitotic-specific cyclin-B2 [Sus scrofa]	biological process: biological regulation (GO:0065007);; cellular component: cell (GO:0005623);; cellular component: macromolecular complex (GO:0032991);; cellular component: cell part (GO:0044464);; biological process: multicellular organismal process (GO:0032501);; biological process: developmental process (GO:0032502);; biological process: single-organism process (GO:0044699);; cellular compon…
ENSSSCG00000004597	AQP9	0.822771	201	1.10235	252	0.617371	149	0.644037	154	0.156641	40	0.271147	72	0.344773	89	0.385669	90	7.50582e-07	1.40826	up	[G]	Carbohydrate transport and metabolism	Molecular Function: purine nucleobase transmembrane transporter activity (GO:0005345);; Molecular Function: pyrimidine nucleobase transmembrane transporter activity (GO:0005350);; Cellular Component: integral component of plasma membrane (GO:0005887);; Molecular Function: urea transmembrane transporter activity (GO:0015204);; Molecular Function: water channel activity (GO:0015250);; Molecular Fun…	K09877|7.0e-165|ssc:100127153|K09877 aquaporin-9 | (RefSeq) AQP9; aquaporin-9	Bile secretion (ko04976)	[G]	Carbohydrate transport and metabolism	Major intrinsic protein	Aquaporin-3 OS=Bos taurus OX=9913 GN=AQP3 PE=2 SV=1	G	Carbohydrate transport and metabolism	aquaporin-9 [Sus scrofa]	molecular function: transporter activity (GO:0005215);; biological process: single-organism process (GO:0044699);; biological process: localization (GO:0051179);; cellular component: cell (GO:0005623);; cellular component: membrane (GO:0016020);; cellular component: membrane part (GO:0044425);; cellular component: cell part (GO:0044464);; cellular component: organelle (GO:0043226);; biological pr…
ENSSSCG00000004678	DUOX2	2.12703	595	2.01404	529	2.23258	617	2.33071	637	1.13186	334	1.21561	367	1.06272	312	1.14564	306	1.88123e-11	0.896354	up	[R]	General function prediction only	Molecular Function: peroxidase activity (GO:0004601);; Molecular Function: calcium ion binding (GO:0005509);; Biological Process: response to oxidative stress (GO:0006979);; Cellular Component: integral component of membrane (GO:0016021);; Molecular Function: NAD(P)H oxidase activity (GO:0016174);; Molecular Function: heme binding (GO:0020037);; Biological Process: hydrogen peroxide biosynthetic …	K13411|0.0e+00|ssc:397060|K13411 dual oxidase [EC:1.6.3.1 1.11.1.-] | (RefSeq) DUOX2; dual oxidase 2 precursor	Thyroid hormone synthesis (ko04918)	[PQ]	Inorganic ion transport and metabolism;; Secondary metabolites biosynthesis, transport and catabolism	Animal haem peroxidase	Dual oxidase 2 OS=Sus scrofa OX=9823 GN=DUOX2 PE=1 SV=2	T	Signal transduction mechanisms	dual oxidase 2 precursor [Sus scrofa]	molecular function: catalytic activity (GO:0003824);; molecular function: antioxidant activity (GO:0016209);; biological process: metabolic process (GO:0008152);; biological process: cellular process (GO:0009987);; biological process: single-organism process (GO:0044699);; biological process: response to stimulus (GO:0050896);; biological process: detoxification (GO:0098754);; molecular function:…
ENSSSCG00000004728	CAPN3	0.64962	95	0.530593	74	0.393665	62	0.569939	82	0.053626	9	0.187041	31	0.215451	36	0.167271	26	4.62787e-07	1.65133	up	[S]	Function unknown	Molecular Function: calcium-dependent cysteine-type endopeptidase activity (GO:0004198);; Molecular Function: calcium ion binding (GO:0005509);; Biological Process: sarcomere organization (GO:0045214);;	K08573|0.0e+00|ssc:397349|K08573 calpain-3 [EC:3.4.22.54] | (RefSeq) CAPN3; calpain-3	--	[OT]	Posttranslational modification, protein turnover, chaperones;; Signal transduction mechanisms	Calpain family cysteine protease	Calpain-3 OS=Sus scrofa OX=9823 GN=CAPN3 PE=2 SV=2	--	--	calpain-3 [Sus scrofa]	molecular function: catalytic activity (GO:0003824);; biological process: metabolic process (GO:0008152);; molecular function: binding (GO:0005488);; biological process: cellular process (GO:0009987);; biological process: single-organism process (GO:0044699);; biological process: cellular component organization or biogenesis (GO:0071840)
ENSSSCG00000004806	ENSSSCG00000004806	2.86541	629	2.86021	597	2.97125	622	2.68007	580	5.31765	1244	4.15467	1002	4.32616	981	2.83247	593	9.30316e-05	-0.595801	down	--	--	Biological Process: signal transduction (GO:0007165);;	K20635|0.0e+00|ssc:100157473|K20635 Rho GTPase-activating protein 11 | (RefSeq) ARHGAP11A; rho GTPase-activating protein 11A	--	[TZ]	Signal transduction mechanisms;; Cytoskeleton	RhoGAP domain	Rho GTPase-activating protein 7 OS=Canis lupus familiaris OX=9615 GN=DLC1 PE=2 SV=1	T	Signal transduction mechanisms	rho GTPase-activating protein 11A [Sus scrofa]	biological process: cellular process (GO:0009987);; biological process: biological regulation (GO:0065007)
ENSSSCG00000004898	TNFRSF11A	0.828309	261	0.954422	276	0.813822	253	0.707306	218	0.322073	107	0.275673	94	0.339639	113	0.28147	85	2.04842e-13	1.38257	up	--	--	Biological Process: ossification (GO:0001503);; Biological Process: adaptive immune response (GO:0002250);; Molecular Function: tumor necrosis factor-activated receptor activity (GO:0005031);; Cellular Component: cytosol (GO:0005829);; Cellular Component: external side of plasma membrane (GO:0009897);; Cellular Component: integral component of membrane (GO:0016021);; Molecular Function: cytokine …	K05147|0.0e+00|ssc:100521706|K05147 tumor necrosis factor receptor superfamily member 11A | (RefSeq) TNFRSF11A; tumor necrosis factor receptor superfamily member 11A isoform X2	Cytokine-cytokine receptor interaction (ko04060);; NF-kappa B signaling pathway (ko04064);; Osteoclast differentiation (ko04380);; Prolactin signaling pathway (ko04917);; Rheumatoid arthritis (ko05323)	--	--	Receptor activator of the NF-KB cysteine-rich repeat domain 2	Tumor necrosis factor receptor superfamily member 5 OS=Sus scrofa OX=9823 GN=CD40 PE=2 SV=1	T	Signal transduction mechanisms	tumor necrosis factor receptor superfamily member 11A isoform X2 [Sus scrofa]	biological process: multicellular organismal process (GO:0032501);; biological process: single-organism process (GO:0044699);; biological process: immune system process (GO:0002376);; biological process: response to stimulus (GO:0050896);; molecular function: signal transducer activity (GO:0004871);; molecular function: molecular transducer activity (GO:0060089);; biological process: cellular pro…
ENSSSCG00000004969	KIF23	5.51717	865	4.1823	635	5.46457	880	3.95261	651	11.3789	1891	7.35446	1283	8.1405	1346	4.30767	665	0.000374103	-0.714601	down	--	--	Biological Process: actomyosin contractile ring assembly (GO:0000915);; Molecular Function: microtubule motor activity (GO:0003777);; Molecular Function: ATP binding (GO:0005524);; Cellular Component: microtubule (GO:0005874);; Molecular Function: microtubule binding (GO:0008017);; Biological Process: plus-end-directed vesicle transport along microtubule (GO:0072383);;	K17387|0.0e+00|ssc:100522116|K17387 kinesin family member 23 | (RefSeq) KIF23; kinesin-like protein KIF23 isoform X1	MicroRNAs in cancer (ko05206)	[Z]	Cytoskeleton	Kinesin motor domain	Kinesin-like protein KIF20A OS=Bos taurus OX=9913 GN=KIF20A PE=2 SV=1	Z	Cytoskeleton	kinesin-like protein KIF23 isoform X4 [Sus scrofa]	biological process: cellular process (GO:0009987);; biological process: single-organism process (GO:0044699);; biological process: cellular component organization or biogenesis (GO:0071840);; molecular function: catalytic activity (GO:0003824);; molecular function: binding (GO:0005488);; cellular component: cell (GO:0005623);; cellular component: organelle (GO:0043226);; cellular component: organ…
ENSSSCG00000005000	FANCM	0.409787	159	0.311547	114	0.338643	130	0.354848	133	0.797491	324	0.577326	242	0.531066	216	0.421239	156	0.000543728	-0.753391	down	[L]	Replication, recombination and repair	Molecular Function: four-way junction DNA binding (GO:0000400);; Biological Process: resolution of meiotic recombination intermediates (GO:0000712);; Molecular Function: chromatin binding (GO:0003682);; Molecular Function: nuclease activity (GO:0004518);; Molecular Function: ATP binding (GO:0005524);; Molecular Function: four-way junction helicase activity (GO:0009378);; Biological Process: inter…	K10896|0.0e+00|ssc:100155917|K10896 fanconi anemia group M protein | (RefSeq) FANCM; Fanconi anemia group M protein isoform X1	Fanconi anemia pathway (ko03460)	[L]	Replication, recombination and repair	FANCM to MHF binding domain	Antiviral innate immune response receptor RIG-I OS=Sus scrofa OX=9823 GN=DDX58 PE=2 SV=1	L	Replication, recombination and repair	Fanconi anemia group M protein isoform X1 [Sus scrofa]	molecular function: binding (GO:0005488);; biological process: reproduction (GO:0000003);; biological process: cellular process (GO:0009987);; biological process: reproductive process (GO:0022414);; biological process: single-organism process (GO:0044699);; molecular function: catalytic activity (GO:0003824);; biological process: cellular component organization or biogenesis (GO:0071840);; biolog…
ENSSSCG00000005056	DLGAP5	3.05128	529	2.51127	411	3.6252	622	2.14424	365	8.08094	1462	4.99822	937	5.94802	1083	2.91307	483	2.34617e-05	-0.980009	down	--	--	Cellular Component: nucleus (GO:0005634);; Cellular Component: mitochondrion (GO:0005739);; Cellular Component: cytosol (GO:0005829);; Biological Process: signaling (GO:0023052);; Cellular Component: spindle pole centrosome (GO:0031616);; Cellular Component: centriolar satellite (GO:0034451);;	K16804|0.0e+00|ssc:100511173|K16804 disks large-associated protein 5 | (RefSeq) DLGAP5; disks large-associated protein 5 isoform X1	--	[T]	Signal transduction mechanisms	Guanylate-kinase-associated protein (GKAP) protein	--	T	Signal transduction mechanisms	disks large-associated protein 5 isoform X1 [Sus scrofa]	cellular component: cell (GO:0005623);; cellular component: organelle (GO:0043226);; cellular component: cell part (GO:0044464);; biological process: signaling (GO:0023052);; cellular component: organelle part (GO:0044422)
ENSSSCG00000005287	PSAT1	135.562	13548	135.836	12625	92.0254	9078	125.601	12269	226.144	23409	198.876	21486	202.156	20921	191.703	18072	2.26417e-14	-0.773039	down	[HE]	Coenzyme transport and metabolism;; Amino acid transport and metabolism	Molecular Function: O-phospho-L-serine:2-oxoglutarate aminotransferase activity (GO:0004648);; Biological Process: L-serine biosynthetic process (GO:0006564);;	K00831|1.8e-210|ssc:100154160|K00831 phosphoserine aminotransferase [EC:2.6.1.52] | (RefSeq) PSAT1; LOW QUALITY PROTEIN: phosphoserine aminotransferase	Glycine, serine and threonine metabolism (ko00260);; Cysteine and methionine metabolism (ko00270);; Vitamin B6 metabolism (ko00750);; Carbon metabolism (ko01200);; Biosynthesis of amino acids (ko01230)	[HE]	Coenzyme transport and metabolism;; Amino acid transport and metabolism	Aminotransferase class-V	Phosphoserine aminotransferase OS=Oryctolagus cuniculus OX=9986 GN=PSAT1 PE=2 SV=1	--	--	LOW QUALITY PROTEIN: phosphoserine aminotransferase [Sus scrofa]	molecular function: catalytic activity (GO:0003824);; biological process: metabolic process (GO:0008152);; biological process: cellular process (GO:0009987);; biological process: single-organism process (GO:0044699)
ENSSSCG00000005311	ENSSSCG00000005311	1.01882	71	1.10217	73	0.854729	61	0.598363	41	0.199258	15	0.378811	29	0.340264	26	0.296713	20	8.56349e-07	1.48836	up	--	--	Molecular Function: transmembrane signaling receptor activity (GO:0004888);; Cellular Component: integral component of plasma membrane (GO:0005887);;	K06504|1.9e-183|ssc:100038011|K06504 CD72 antigen | (RefSeq) CD72; B-cell differentiation antigen CD72	B cell receptor signaling pathway (ko04662)	[TV]	Signal transduction mechanisms;; Defense mechanisms	Lectin C-type domain	--	--	--	B-cell differentiation antigen CD72 [Sus scrofa]	molecular function: signal transducer activity (GO:0004871);; molecular function: molecular transducer activity (GO:0060089);; biological process: cellular process (GO:0009987);; biological process: signaling (GO:0023052);; biological process: single-organism process (GO:0044699);; biological process: response to stimulus (GO:0050896);; biological process: biological regulation (GO:0065007);; cel…
ENSSSCG00000005474	SAL1	5.72315	238	6.8585	268	5.51008	226	6.67197	271	2.65413	116	2.5668	116	1.90844	84	2.49569	99	1.48926e-11	1.31964	up	--	--	Molecular Function: small molecule binding (GO:0036094);;	K01830|3.1e-12|fab:101817239|K01830 prostaglandin-H2 D-isomerase [EC:5.3.99.2] | (RefSeq) extracellular fatty acid-binding protein-like	Arachidonic acid metabolism (ko00590)	--	--	Lipocalin / cytosolic fatty-acid binding protein family	Salivary lipocalin OS=Sus scrofa OX=9823 GN=SAL1 PE=1 SV=1	S	Function unknown	salivary lipocalin precursor [Sus scrofa]	molecular function: binding (GO:0005488)
ENSSSCG00000005490	WHRN	0.845984	158	0.827224	146	0.954113	176	0.805343	147	0.347931	69	0.558088	114	0.387511	77	0.569752	103	0.000298539	0.826396	up	--	--	Biological Process: retina homeostasis (GO:0001895);; Cellular Component: photoreceptor inner segment (GO:0001917);; Cellular Component: stereocilia ankle link (GO:0002141);; Cellular Component: stereocilia ankle link complex (GO:0002142);; Cellular Component: cytoplasm (GO:0005737);; Cellular Component: actin filament (GO:0005884);; Cellular Component: plasma membrane (GO:0005886);; Biological P…	K21879|0.0e+00|ssc:100520475|K21879 whirlin | (RefSeq) WHRN; whirlin isoform X1	--	[S]	Function unknown	PDZ domain	PDZ domain-containing protein 7 OS=Pongo abelii OX=9601 GN=PDZD7 PE=2 SV=2	S	Function unknown	whirlin isoform X1 [Sus scrofa]	biological process: multicellular organismal process (GO:0032501);; biological process: single-organism process (GO:0044699);; biological process: biological regulation (GO:0065007);; cellular component: cell (GO:0005623);; cellular component: cell part (GO:0044464);; cellular component: macromolecular complex (GO:0032991);; cellular component: organelle (GO:0043226);; cellular component: organel…
ENSSSCG00000005503	TLR4	3.01462	592	2.63872	587	1.64436	383	2.46879	446	1.34801	244	1.80892	360	1.12302	264	0.827773	229	3.69848e-07	0.918674	up	--	--	Biological Process: toll-like receptor signaling pathway (GO:0002224);; Molecular Function: transmembrane signaling receptor activity (GO:0004888);; Cellular Component: integral component of membrane (GO:0016021);; Biological Process: innate immune response (GO:0045087);;	K10160|0.0e+00|ssc:399541|K10160 toll-like receptor 4 | (RefSeq) TLR4; toll-like receptor 4 isoform 1 precursor	NF-kappa B signaling pathway (ko04064);; HIF-1 signaling pathway (ko04066);; Phagosome (ko04145);; PI3K-Akt signaling pathway (ko04151);; Necroptosis (ko04217);; Toll-like receptor signaling pathway (ko04620);; NOD-like receptor signaling pathway (ko04621);; Salmonella infection (ko05132);; Pertussis (ko05133);; Legionellosis (ko05134);; Yersinia infection (ko05135);; Leishmaniasis (ko05140);; Ch…	[T]	Signal transduction mechanisms	Leucine rich repeat	Toll-like receptor 4 OS=Sus scrofa OX=9823 GN=TLR4 PE=2 SV=1	T	Signal transduction mechanisms	toll-like receptor 4 isoform 1 precursor [Sus scrofa]	biological process: immune system process (GO:0002376);; biological process: cellular process (GO:0009987);; biological process: signaling (GO:0023052);; biological process: single-organism process (GO:0044699);; biological process: response to stimulus (GO:0050896);; biological process: biological regulation (GO:0065007);; molecular function: signal transducer activity (GO:0004871);; molecular f…
ENSSSCG00000005620	SH2D3C	0.505921	130	0.337612	82	0.374131	94	0.305114	77	0.207946	56	0.220632	52	0.281468	76	0.17334	44	0.00184908	0.789359	up	--	--	Molecular Function: guanyl-nucleotide exchange factor activity (GO:0005085);; Biological Process: small GTPase mediated signal transduction (GO:0007264);;	K08889|2.5e-11|bpec:110166010|K08889 tyrosine-protein kinase Fer [EC:2.7.10.2] | (RefSeq) tyrosine-protein kinase Fer-like isoform X1	Adherens junction (ko04520)	--	--	SH2 domain	Breast cancer anti-estrogen resistance protein 3 homolog OS=Bos taurus OX=9913 GN=BCAR3 PE=2 SV=2	T	Signal transduction mechanisms	SH2 domain-containing protein 3C isoform X5 [Felis catus]	molecular function: molecular function regulator (GO:0098772);; biological process: biological regulation (GO:0065007);; biological process: cellular process (GO:0009987);; biological process: signaling (GO:0023052);; biological process: single-organism process (GO:0044699);; biological process: response to stimulus (GO:0050896)
ENSSSCG00000005845	TOR4A	1.73324	123	1.45136	97	1.5796	111	1.53426	107	0.968338	72	0.847482	65	0.795911	60	0.7799	53	7.03046e-05	0.853828	up	--	--	Molecular Function: ATP binding (GO:0005524);;	K22999|2.0e-16|mmu:30933|K22999 torsin-2A | (RefSeq) Tor2a, Prosalusin; torsin family 2, member A	--	[R]	General function prediction only	Torsin	--	O	Posttranslational modification, protein turnover, chaperones	torsin-4A [Sus scrofa]	molecular function: binding (GO:0005488)
ENSSSCG00000005949	ENSSSCG00000005949	1.12803	193	0.879066	150	0.984513	147	1.1036	163	0.221288	38	0.519452	87	0.559699	96	0.756712	104	0.000251761	1.0341	up	--	--	Biological Process: regulation of signal transduction (GO:0009966);;	K08890|6.7e-25|clv:102092955|K08890 B lymphoid tyrosine kinase [EC:2.7.10.2] | (RefSeq) BLK; tyrosine-protein kinase Blk	--	--	--	SH2 domain	Tyrosine-protein kinase HCK OS=Macaca fascicularis OX=9541 GN=HCK PE=2 SV=3	T	Signal transduction mechanisms	Src-like-adaptor [Bos taurus]	biological process: biological regulation (GO:0065007)
ENSSSCG00000005967	LRATD2	0.444299	108	0.324181	74	0.224531	54	0.393603	94	0.907179	230	0.717884	188	0.435931	111	0.484689	112	0.00120041	-0.904195	down	--	--	Cellular Component: cytoplasm (GO:0005737);; Cellular Component: plasma membrane (GO:0005886);;	K22810|9.6e-181|ssc:100623936|K22810 protein FAM84B | (RefSeq) FAM84B; protein FAM84B	--	--	--	Lecithin retinol acyltransferase	Protein LRATD1 OS=Bos taurus OX=9913 GN=LRATD1 PE=2 SV=1	S	Function unknown	protein FAM84B [Sus scrofa]	cellular component: cell (GO:0005623);; cellular component: cell part (GO:0044464);; cellular component: membrane (GO:0016020)
ENSSSCG00000005975	MTSS1	1.15166	315	1.20569	308	1.14411	338	0.768682	234	0.603393	180	0.535528	182	0.577616	190	0.694903	204	0.000109987	0.698234	up	--	--	Molecular Function: actin binding (GO:0003779);; Biological Process: plasma membrane organization (GO:0007009);; Biological Process: actin cytoskeleton organization (GO:0030036);;	K20128|0.0e+00|ssc:106509958|K20128 metastasis suppressor protein 1 | (RefSeq) MTSS1; metastasis suppressor protein 1 isoform X1	--	--	--	IRSp53/MIM homology domain	--	Z	Cytoskeleton	metastasis suppressor protein 1 isoform X1 [Sus scrofa]	molecular function: binding (GO:0005488);; biological process: cellular process (GO:0009987);; biological process: single-organism process (GO:0044699);; biological process: cellular component organization or biogenesis (GO:0071840)
ENSSSCG00000005994	SNTB1	8.62677	2610	8.84981	2516	9.22145	2754	8.15663	2412	4.93133	1563	4.47314	1463	4.82799	1534	6.00054	1733	7.74124e-15	0.747712	up	--	--	Molecular Function: structural molecule activity (GO:0005198);; Cellular Component: dystrophin-associated glycoprotein complex (GO:0016010);; Cellular Component: synapse (GO:0045202);;	K12196|1.7e-124|pps:100979126|K12196 vacuolar protein-sorting-associated protein 4 | (RefSeq) SNTB2, VPS4A; vacuolar protein sorting-associated protein 4A	Endocytosis (ko04144);; Necroptosis (ko04217)	[W]	Extracellular structures	PH domain	Alpha-1-syntrophin OS=Oryctolagus cuniculus OX=9986 GN=SNTA1 PE=1 SV=1	W	Extracellular structures	beta-1-syntrophin [Sus scrofa]	molecular function: structural molecule activity (GO:0005198);; cellular component: cell (GO:0005623);; cellular component: membrane (GO:0016020);; cellular component: macromolecular complex (GO:0032991);; cellular component: membrane part (GO:0044425);; cellular component: cell part (GO:0044464);; cellular component: synapse (GO:0045202)
ENSSSCG00000006002	CCN3	3.19354	372	2.80241	298	3.14466	371	3.48077	388	1.76536	205	1.59137	200	2.00934	240	1.73557	188	6.20829e-07	0.823617	up	--	--	Biological Process: angiogenesis (GO:0001525);; Biological Process: chondrocyte differentiation (GO:0002062);; Molecular Function: Notch binding (GO:0005112);; Molecular Function: integrin binding (GO:0005178);; Molecular Function: insulin-like growth factor binding (GO:0005520);; Cellular Component: cytoplasm (GO:0005737);; Cellular Component: gap junction (GO:0005921);; Biological Process: cell…	K23571|1.2e-199|ssc:100154395|K23571 insulin-like growth factor-binding protein 9 | (RefSeq) NOV; protein NOV homolog	--	--	--	CCN3 Nov like TSP1 domain	CCN family member 2 OS=Bos taurus OX=9913 GN=CCN2 PE=2 SV=2	W	Extracellular structures	protein NOV homolog [Sus scrofa]	biological process: developmental process (GO:0032502);; biological process: single-organism process (GO:0044699);; biological process: cellular process (GO:0009987);; molecular function: binding (GO:0005488);; cellular component: cell (GO:0005623);; cellular component: cell part (GO:0044464);; cellular component: cell junction (GO:0030054);; biological process: biological adhesion (GO:0022610);;…
ENSSSCG00000006013	AARD	6.08081	401	6.25779	388	5.55895	362	5.58053	360	3.08805	214	3.25954	233	3.91399	271	2.91114	184	5.33733e-07	0.791793	up	--	--	Biological Process: multicellular organism development (GO:0007275);; Biological Process: biological_process (GO:0008150);; Biological Process: respiratory tube development (GO:0030323);; Biological Process: lung development (GO:0030324);; Biological Process: multicellular organismal process (GO:0032501);; Biological Process: developmental process (GO:0032502);; Biological Process: tube developme…	--	--	--	--	--	--	S	Function unknown	alanine and arginine-rich domain-containing protein [Sus scrofa]	biological process: multicellular organismal process (GO:0032501);; biological process: developmental process (GO:0032502);; biological process: single-organism process (GO:0044699)
ENSSSCG00000006051	CTHRC1	9.22199	504	10.2476	527	6.08523	329	10.3244	552	16.1326	922	17.8369	1053	14.3794	824	17.4663	911	3.76946e-09	-0.911373	down	--	--	Biological Process: ossification (GO:0001503);; Molecular Function: G-protein coupled receptor binding (GO:0001664);; Biological Process: establishment of planar polarity (GO:0001736);; Biological Process: morphogenesis of a polarized epithelium (GO:0001738);; Biological Process: embryonic epithelial tube formation (GO:0001838);; Biological Process: neural tube formation (GO:0001841);; Biological…	K19721|3.4e-27|pdam:113667988|K19721 collagen type V/XI/XXIV/XXVII, alpha | (RefSeq) collagen alpha-2(IV) chain-like	--	--	--	--	--	T	Signal transduction mechanisms	PREDICTED: collagen triple helix repeat-containing protein 1 [Ceratotherium simum simum]	biological process: multicellular organismal process (GO:0032501);; biological process: single-organism process (GO:0044699);; molecular function: binding (GO:0005488);; biological process: developmental process (GO:0032502);; cellular component: extracellular region (GO:0005576);; cellular component: extracellular region part (GO:0044421);; cellular component: cell (GO:0005623);; cellular compon…
ENSSSCG00000006132	MMP16	2.01462	580	1.67644	454	1.76466	502	2.00405	564	2.74179	826	3.1387	977	3.05137	922	3.36442	924	4.83135e-10	-0.756284	down	[O]	Posttranslational modification, protein turnover, chaperones	Biological Process: skeletal system development (GO:0001501);; Biological Process: endochondral ossification (GO:0001958);; Molecular Function: metalloendopeptidase activity (GO:0004222);; Cellular Component: extracellular space (GO:0005615);; Cellular Component: integral component of plasma membrane (GO:0005887);; Molecular Function: zinc ion binding (GO:0008270);; Biological Process: protein pr…	K07996|1.2e-309|oor:101286903|K07996 matrix metalloproteinase-16 (membrane-inserted) [EC:3.4.24.-] | (RefSeq) MMP16; matrix metalloproteinase-16	Parathyroid hormone synthesis, secretion and action (ko04928);; MicroRNAs in cancer (ko05206)	[OW]	Posttranslational modification, protein turnover, chaperones;; Extracellular structures	Matrixin	Matrix metalloproteinase-14 OS=Pongo abelii OX=9601 GN=MMP14 PE=2 SV=1	--	--	matrix metalloproteinase-16 [Sus scrofa]	biological process: multicellular organismal process (GO:0032501);; biological process: developmental process (GO:0032502);; biological process: single-organism process (GO:0044699);; molecular function: catalytic activity (GO:0003824);; biological process: metabolic process (GO:0008152);; cellular component: extracellular region (GO:0005576);; cellular component: extracellular region part (GO:00…
ENSSSCG00000006141	CA3	4.82137	366	6.38583	452	8.45098	628	6.66118	491	2.15098	171	1.98345	162	2.02526	160	2.86162	205	6.57989e-14	1.51283	up	[P]	Inorganic ion transport and metabolism	Molecular Function: carbonate dehydratase activity (GO:0004089);; Cellular Component: cytoplasm (GO:0005737);; Molecular Function: zinc ion binding (GO:0008270);;	K01672|2.5e-135|ssc:494016|K01672 carbonic anhydrase [EC:4.2.1.1] | (RefSeq) CA3; carbonic anhydrase 3	Nitrogen metabolism (ko00910)	[R]	General function prediction only	Eukaryotic-type carbonic anhydrase	Carbonic anhydrase 3 OS=Sus scrofa OX=9823 GN=CA3 PE=2 SV=3	P	Inorganic ion transport and metabolism	carbonic anhydrase 3 [Sus scrofa]	molecular function: catalytic activity (GO:0003824);; cellular component: cell (GO:0005623);; cellular component: cell part (GO:0044464);; molecular function: binding (GO:0005488)
ENSSSCG00000006153	FABP5	79.3204	12176	84.251	12056	66.3439	10078	74.2336	11209	40.4217	6414	38.1526	6261	38.8046	6263	42.2447	6286	3.38005e-30	0.893509	up	--	--	Molecular Function: lipid binding (GO:0008289);;	K08754|5.5e-72|ssc:574074|K08754 fatty acid-binding protein 5, epidermal | (RefSeq) FABP5; fatty acid-binding protein, epidermal	PPAR signaling pathway (ko03320)	[I]	Lipid transport and metabolism	Lipocalin / cytosolic fatty-acid binding protein family	Fatty acid-binding protein 5 OS=Bos taurus OX=9913 GN=FABP5 PE=1 SV=4	I	Lipid transport and metabolism	fatty acid-binding protein 5 [Sus scrofa]	molecular function: binding (GO:0005488)
ENSSSCG00000006160	STMN2	0.62068	66	0.827469	82	1.07879	113	0.658897	68	0.982402	109	1.70702	195	1.47141	163	1.85981	187	0.000318334	-0.950982	down	--	--	Biological Process: negative regulation of microtubule depolymerization (GO:0007026);; Biological Process: positive regulation of neuron projection development (GO:0010976);; Biological Process: negative regulation of neuron projection development (GO:0010977);; Cellular Component: lamellipodium (GO:0030027);; Cellular Component: growth cone (GO:0030426);; Biological Process: negative regulation …	K04381|1.0e-36|xla:397962|K04381 stathmin | (RefSeq) stmn1.L, op18, stathmin, stmn1-a, stmn1-b, stmn1b, xo35; stathmin 1 L homeolog	MAPK signaling pathway (ko04010)	--	--	Stathmin family	Stathmin-3 OS=Macaca fascicularis OX=9541 GN=STMN3 PE=2 SV=1	S	Function unknown	hypothetical protein HPG69_011473 [Diceros bicornis minor]	biological process: biological regulation (GO:0065007);; biological process: cellular process (GO:0009987);; biological process: multicellular organismal process (GO:0032501);; biological process: developmental process (GO:0032502);; biological process: single-organism process (GO:0044699);; cellular component: cell (GO:0005623);; cellular component: cell part (GO:0044464);; molecular function: b…
ENSSSCG00000006163	PKIA	21.8897	4002	22.4057	3849	21.2717	3839	23.1845	4143	30.7049	5878	34.2889	6776	34.6371	6647	35.5631	6204	3.57497e-17	-0.644041	down	--	--	Molecular Function: cAMP-dependent protein kinase inhibitor activity (GO:0004862);;	K15985|1.8e-47|oro:101375833|K15985 cAMP-dependent protein kinase inhibitor alpha | (RefSeq) PKIA; cAMP-dependent protein kinase inhibitor alpha	Alcoholism (ko05034)	--	--	cAMP-dependent protein kinase inhibitor	cAMP-dependent protein kinase inhibitor alpha OS=Bos taurus OX=9913 GN=PKIA PE=1 SV=3	T	Signal transduction mechanisms	cAMP-dependent protein kinase inhibitor alpha isoform X1 [Enhydra lutris kenyoni]	molecular function: molecular function regulator (GO:0098772);; biological process: biological regulation (GO:0065007)
ENSSSCG00000006213	ENSSSCG00000006213	2.61858	394	2.35796	333	3.55581	528	2.58507	380	1.69747	268	1.61873	263	1.52818	240	2.24351	322	0.000917267	0.616805	up	[C]	Energy production and conversion	Cellular Component: integral component of membrane (GO:0016021);; Molecular Function: oxidoreductase activity (GO:0016491);; Molecular Function: metal ion binding (GO:0046872);;	K11173|7.3e-260|ssc:100521620|K11173 hydroxyacid-oxoacid transhydrogenase [EC:1.1.99.24] | (RefSeq) ADHFE1; hydroxyacid-oxoacid transhydrogenase, mitochondrial	--	[C]	Energy production and conversion	Iron-containing alcohol dehydrogenase	Hydroxyacid-oxoacid transhydrogenase, mitochondrial OS=Bos taurus OX=9913 GN=ADHFE1 PE=2 SV=1	C	Energy production and conversion	hydroxyacid-oxoacid transhydrogenase, mitochondrial [Sus scrofa]	cellular component: membrane (GO:0016020);; cellular component: membrane part (GO:0044425);; molecular function: catalytic activity (GO:0003824);; molecular function: binding (GO:0005488)
ENSSSCG00000006247	PLAG1	1.01812	123	1.50596	171	1.71093	204	1.16928	138	0.865656	110	0.884762	116	0.923847	117	0.826874	95	0.00792212	0.588277	up	--	--	Molecular Function: RNA polymerase II core promoter proximal region sequence-specific DNA binding (GO:0000978);; Molecular Function: transcriptional activator activity, RNA polymerase II transcription regulatory region sequence-specific binding (GO:0001228);; Cellular Component: centrosome (GO:0005813);; Cellular Component: cytosol (GO:0005829);; Biological Process: transcription, DNA-templated (…	K19484|1.6e-217|ssc:100154905|K19484 zinc finger protein PLAG1 | (RefSeq) PLAG1; zinc finger protein PLAG1 isoform X1	--	[R]	General function prediction only	Zinc-finger double domain	Zinc finger protein PLAGL1 OS=Sus scrofa OX=9823 GN=PLAGL1 PE=2 SV=1	K	Transcription	zinc finger protein PLAG1 isoform X1 [Sus scrofa]	molecular function: binding (GO:0005488);; molecular function: nucleic acid binding transcription factor activity (GO:0001071);; biological process: biological regulation (GO:0065007);; cellular component: cell (GO:0005623);; cellular component: organelle (GO:0043226);; cellular component: organelle part (GO:0044422);; cellular component: cell part (GO:0044464);; biological process: metabolic pro…
ENSSSCG00000006287	SELL	0.50968	64	1.00229	119	0.8118	101	0.59432	75	0.176118	24	0.181303	30	0.095365	15	0.132718	19	1.46944e-11	2.07543	up	--	--	Cellular Component: integral component of membrane (GO:0016021);; Biological Process: calcium-dependent cell-cell adhesion via plasma membrane cell adhesion molecules (GO:0016339);; Molecular Function: metal ion binding (GO:0046872);; Biological Process: leukocyte migration (GO:0050900);;	K06495|5.2e-212|ssc:100127147|K06495 selectin, lymphocyte | (RefSeq) SELL; L-selectin precursor	Cell adhesion molecules (ko04514)	[TV]	Signal transduction mechanisms;; Defense mechanisms	Lectin C-type domain	L-selectin OS=Pongo pygmaeus OX=9600 GN=SELL PE=2 SV=1	T	Signal transduction mechanisms	L-selectin isoform X1 [Sus scrofa]	cellular component: membrane (GO:0016020);; cellular component: membrane part (GO:0044425);; biological process: biological adhesion (GO:0022610);; molecular function: binding (GO:0005488);; biological process: immune system process (GO:0002376);; biological process: cellular process (GO:0009987);; biological process: locomotion (GO:0040011);; biological process: single-organism process (GO:00446…
ENSSSCG00000006289	F5	0.74039	238	0.76187	230	1.212	384	1.00233	315	0.29256	99	0.386083	134	0.506812	171	0.675524	207	0.000221029	0.964082	up	[DPM]	Cell cycle control, cell division, chromosome partitioning;; Inorganic ion transport and metabolism;; Cell wall/membrane/envelope biogenesis	Molecular Function: copper ion binding (GO:0005507);; Cellular Component: extracellular space (GO:0005615);; Biological Process: blood coagulation (GO:0007596);; Biological Process: blood circulation (GO:0008015);; Cellular Component: platelet alpha granule (GO:0031091);;	K03902|0.0e+00|ssc:397217|K03902 coagulation factor V (labile factor) | (RefSeq) F5; coagulation factor V precursor	Complement and coagulation cascades (ko04610)	--	--	F5/8 type C domain	Coagulation factor V OS=Sus scrofa OX=9823 GN=F5 PE=2 SV=1	T	Signal transduction mechanisms	coagulation factor V precursor [Sus scrofa]	molecular function: binding (GO:0005488);; cellular component: extracellular region (GO:0005576);; cellular component: extracellular region part (GO:0044421);; biological process: multicellular organismal process (GO:0032501);; biological process: single-organism process (GO:0044699);; biological process: biological regulation (GO:0065007);; cellular component: cell (GO:0005623);; cellular compon…
ENSSSCG00000006333	NUF2	3.76267	313	4.16033	325	3.68818	303	3.26874	266	8.09248	703	5.44629	489	5.61884	490	3.14825	250	0.00450038	-0.616235	down	--	--	Cellular Component: condensed nuclear chromosome kinetochore (GO:0000778);; Cellular Component: nucleoplasm (GO:0005654);; Biological Process: mitotic spindle organization (GO:0007052);; Cellular Component: Ndc80 complex (GO:0031262);; Molecular Function: macromolecular complex binding (GO:0044877);; Biological Process: meiotic chromosome segregation (GO:0045132);; Biological Process: attachment …	K11548|1.6e-232|ssc:100152590|K11548 kinetochore protein Nuf2 | (RefSeq) NUF2; kinetochore protein Nuf2	--	[D]	Cell cycle control, cell division, chromosome partitioning	Nuf2 family	--	D	Cell cycle control, cell division, chromosome partitioning	kinetochore protein Nuf2 [Sus scrofa]	cellular component: cell (GO:0005623);; cellular component: membrane-enclosed lumen (GO:0031974);; cellular component: macromolecular complex (GO:0032991);; cellular component: organelle (GO:0043226);; cellular component: organelle part (GO:0044422);; cellular component: cell part (GO:0044464);; biological process: cellular process (GO:0009987);; biological process: single-organism process (GO:00…
ENSSSCG00000006350	ENSSSCG00000006350	2.80558	225	3.1309	225	2.70359	197	2.91439	223	0.674657	60	1.45877	131	0.802092	70	1.56241	104	2.65731e-07	1.29125	up	--	--	Cellular Component: integral component of membrane (GO:0016021);;	K12560|1.2e-72|ssc:613131|K12560 low affinity immunoglobulin gamma Fc receptor II-b | (RefSeq) FCGR2B; low affinity immunoglobulin gamma Fc region receptor II-b precursor	Phagosome (ko04145);; Osteoclast differentiation (ko04380);; B cell receptor signaling pathway (ko04662);; Fc gamma R-mediated phagocytosis (ko04666);; Staphylococcus aureus infection (ko05150);; Tuberculosis (ko05152);; Measles (ko05162)	--	--	Immunoglobulin domain	Low affinity immunoglobulin gamma Fc region receptor II OS=Bos taurus OX=9913 GN=FCGR2 PE=2 SV=1	T	Signal transduction mechanisms	low affinity immunoglobulin gamma Fc region receptor II-b-like isoform X1 [Sus scrofa]	cellular component: membrane (GO:0016020);; cellular component: membrane part (GO:0044425)
ENSSSCG00000006357	FCER1G	3.10063	180	5.98054	326	4.76346	276	3.66999	208	0.635883	39	1.86124	116	1.77394	108	2.30026	128	2.26969e-05	1.37426	up	--	--	Molecular Function: IgE receptor activity (GO:0019767);; Cellular Component: Fc-epsilon receptor I complex (GO:0032998);;	K07983|2.5e-53|bacu:103012370|K07983 high affinity immunoglobulin epsilon receptor subunit gamma | (RefSeq) uncharacterized LOC103012370	Sphingolipid signaling pathway (ko04071);; Phospholipase D signaling pathway (ko04072);; Platelet activation (ko04611);; C-type lectin receptor signaling pathway (ko04625);; Natural killer cell mediated cytotoxicity (ko04650);; Fc epsilon RI signaling pathway (ko04664);; Tuberculosis (ko05152);; Asthma (ko05310)	--	--	T-cell surface glycoprotein CD3 zeta chain	High affinity immunoglobulin epsilon receptor subunit gamma OS=Sus scrofa OX=9823 GN=FCER1G PE=3 SV=1	T	Signal transduction mechanisms	high affinity immunoglobulin epsilon receptor subunit gamma [Tursiops truncatus]	molecular function: signal transducer activity (GO:0004871);; molecular function: molecular transducer activity (GO:0060089);; biological process: cellular process (GO:0009987);; biological process: signaling (GO:0023052);; biological process: single-organism process (GO:0044699);; biological process: response to stimulus (GO:0050896);; biological process: biological regulation (GO:0065007);; cel…
ENSSSCG00000006372	ARHGAP30	1.11831	211	1.36162	241	1.00561	187	1.25657	232	0.321443	64	0.435663	89	0.358781	71	0.532805	96	3.13885e-11	1.48193	up	--	--	Biological Process: signal transduction (GO:0007165);;	K20645|0.0e+00|ssc:100158101|K20645 Rho GTPase-activating protein 30 | (RefSeq) ARHGAP30; rho GTPase-activating protein 30 isoform X5	--	--	--	RhoGAP domain	--	T	Signal transduction mechanisms	rho GTPase-activating protein 30 isoform X1 [Sus scrofa]	biological process: cellular process (GO:0009987);; biological process: biological regulation (GO:0065007)
ENSSSCG00000006379	CD48	1.65332	160	1.75656	160	1.64196	157	1.66593	158	0.415192	43	0.508519	54	0.73999	76	0.471582	44	4.57668e-12	1.5945	up	--	--	Biological Process: regulation of adaptive immune response (GO:0002819);; Molecular Function: antigen binding (GO:0003823);; Cellular Component: integral component of membrane (GO:0016021);; Molecular Function: signaling receptor activity (GO:0038023);;	K06479|4.0e-134|ssc:100511130|K06479 CD48 antigen | (RefSeq) CD48; CD48 antigen precursor	Natural killer cell mediated cytotoxicity (ko04650)	--	--	Immunoglobulin I-set domain	--	T	Signal transduction mechanisms	CD48 antigen precursor [Sus scrofa]	biological process: biological regulation (GO:0065007);; molecular function: binding (GO:0005488);; cellular component: membrane (GO:0016020);; cellular component: membrane part (GO:0044425);; molecular function: signal transducer activity (GO:0004871);; molecular function: molecular transducer activity (GO:0060089);; biological process: cellular process (GO:0009987);; biological process: signali…
ENSSSCG00000006475	IQGAP3	1.06065	387	0.86719	297	1.00125	361	0.991698	354	2.22492	849	1.39918	551	1.5112	578	0.972171	339	0.000774528	-0.669413	down	--	--	Biological Process: G1/S transition of mitotic cell cycle (GO:0000082);; Biological Process: activation of MAPK activity (GO:0000187);; Molecular Function: calmodulin binding (GO:0005516);; Cellular Component: cytoplasm (GO:0005737);; Cellular Component: cell-cell junction (GO:0005911);; Biological Process: Ras protein signal transduction (GO:0007265);; Biological Process: regulation of cell size…	K05767|0.0e+00|ssc:100515079|K05767 Ras GTPase-activating-like protein IQGAP2/3 | (RefSeq) IQGAP3; ras GTPase-activating-like protein IQGAP3 isoform X1	Regulation of actin cytoskeleton (ko04810)	[T]	Signal transduction mechanisms	GTPase-activator protein for Ras-like GTPase	--	Z	Cytoskeleton	ras GTPase-activating-like protein IQGAP3 isoform X1 [Sus scrofa]	biological process: cellular process (GO:0009987);; biological process: single-organism process (GO:0044699);; biological process: biological regulation (GO:0065007);; molecular function: binding (GO:0005488);; cellular component: cell (GO:0005623);; cellular component: cell part (GO:0044464);; cellular component: cell junction (GO:0030054);; biological process: signaling (GO:0023052);; biologica…
ENSSSCG00000006495	SEMA4A	1.47307	196	1.03731	139	0.994473	140	1.07886	150	0.713953	107	0.629756	95	0.657821	99	0.380595	52	0.000170767	0.875808	up	--	--	Biological Process: neural crest cell migration (GO:0001755);; Cellular Component: extracellular space (GO:0005615);; Cellular Component: integral component of plasma membrane (GO:0005887);; Biological Process: axon guidance (GO:0007411);; Biological Process: regulation of cell shape (GO:0008360);; Biological Process: regulation of endothelial cell migration (GO:0010594);; Biological Process: neg…	K06521|0.0e+00|ssc:100157147|K06521 semaphorin 4 | (RefSeq) SEMA4A; semaphorin-4A isoform X1	Axon guidance (ko04360)	[T]	Signal transduction mechanisms	Sema domain	Semaphorin-4A OS=Bos taurus OX=9913 GN=SEMA4A PE=2 SV=1	T	Signal transduction mechanisms	semaphorin-4A isoform X1 [Sus scrofa]	biological process: cellular process (GO:0009987);; biological process: locomotion (GO:0040011);; biological process: single-organism process (GO:0044699);; biological process: localization (GO:0051179);; cellular component: extracellular region (GO:0005576);; cellular component: extracellular region part (GO:0044421);; cellular component: cell (GO:0005623);; cellular component: membrane (GO:0016…
ENSSSCG00000006560	CREB3L4	1.7718	137	1.55541	113	1.23182	94	1.54332	117	1.30649	106	0.846123	71	0.59683	49	0.943778	70	0.00662891	0.682125	up	--	--	Molecular Function: transcriptional activator activity, RNA polymerase II transcription regulatory region sequence-specific binding (GO:0001228);; Cellular Component: nucleoplasm (GO:0005654);; Cellular Component: mitochondrion (GO:0005739);; Cellular Component: endoplasmic reticulum (GO:0005783);; Cellular Component: Golgi apparatus (GO:0005794);; Biological Process: spermatogenesis (GO:0007283)…	K09048|2.0e-223|ssc:100142688|K09048 cyclic AMP-responsive element-binding protein 3 | (RefSeq) CREB3L4; cyclic AMP-responsive element-binding protein 3-like protein 4	cGMP-PKG signaling pathway (ko04022);; cAMP signaling pathway (ko04024);; PI3K-Akt signaling pathway (ko04151);; AMPK signaling pathway (ko04152);; Longevity regulating pathway (ko04211);; Adrenergic signaling in cardiomyocytes (ko04261);; TNF signaling pathway (ko04668);; Thermogenesis (ko04714);; Cholinergic synapse (ko04725);; Dopaminergic synapse (ko04728);; Insulin secretion (ko04911);; Estr…	[K]	Transcription	bZIP transcription factor	Cyclic AMP-responsive element-binding protein 3-like protein 4 OS=Macaca fascicularis OX=9541 GN=CREB3L4 PE=2 SV=1	K	Transcription	cyclic AMP-responsive element-binding protein 3-like protein 4 isoform X1 [Sus scrofa]	molecular function: nucleic acid binding transcription factor activity (GO:0001071);; biological process: biological regulation (GO:0065007);; cellular component: cell (GO:0005623);; cellular component: organelle (GO:0043226);; cellular component: organelle part (GO:0044422);; cellular component: cell part (GO:0044464);; biological process: reproduction (GO:0000003);; biological process: reproduc…
ENSSSCG00000006578	S100A4	17.1091	392	17.7147	381	9.12526	206	15.1496	339	44.8468	1074	26.0192	644	22.7956	548	16.0446	351	0.000335192	-0.927787	down	--	--	Molecular Function: calcium ion binding (GO:0005509);; Molecular Function: transition metal ion binding (GO:0046914);;	K10159|5.8e-18|xma:102230797|K10159 toll-like receptor 2 | (RefSeq) toll-like receptor 2 type-2 isoform X1	Phagosome (ko04145);; Toll-like receptor signaling pathway (ko04620);; Salmonella infection (ko05132);; Herpes simplex virus 1 infection (ko05168)	--	--	S-100/ICaBP type calcium binding domain	Protein S100-A4 OS=Bos taurus OX=9913 GN=S100A4 PE=1 SV=2	T	Signal transduction mechanisms	protein S100-A4 isoform X1 [Sus scrofa]	molecular function: binding (GO:0005488)
ENSSSCG00000006648	CTSS	14.9184	2516	16.5806	2662	11.0039	1856	11.6321	1943	6.45455	1156	5.97584	1104	7.62846	1295	7.45171	1215	6.50078e-16	0.951424	up	[O]	Posttranslational modification, protein turnover, chaperones	Molecular Function: cysteine-type peptidase activity (GO:0008234);;	K01368|5.2e-201|ssc:100153090|K01368 cathepsin S [EC:3.4.22.27] | (RefSeq) CTSS; cathepsin S	Lysosome (ko04142);; Phagosome (ko04145);; Apoptosis (ko04210);; Antigen processing and presentation (ko04612);; Tuberculosis (ko05152)	[O]	Posttranslational modification, protein turnover, chaperones	Papain family cysteine protease	Cathepsin S OS=Bos taurus OX=9913 GN=CTSS PE=1 SV=2	O	Posttranslational modification, protein turnover, chaperones	cathepsin S [Sus scrofa]	molecular function: catalytic activity (GO:0003824);; biological process: metabolic process (GO:0008152)
ENSSSCG00000006717	PHGDH	59.7036	4811	59.8491	4449	55.0206	4337	51.9169	4000	114.323	9470	84.2129	7182	86.4042	7168	72.7144	5503	7.3775e-11	-0.685078	down	[HR]	Coenzyme transport and metabolism;; General function prediction only	Molecular Function: phosphoglycerate dehydrogenase activity (GO:0004617);; Biological Process: L-serine biosynthetic process (GO:0006564);; Molecular Function: NAD binding (GO:0051287);;	K00058|1.9e-306|ssc:100144529|K00058 D-3-phosphoglycerate dehydrogenase / 2-oxoglutarate reductase [EC:1.1.1.95 1.1.1.399] | (RefSeq) PHGDH; D-3-phosphoglycerate dehydrogenase	Glycine, serine and threonine metabolism (ko00260);; Cysteine and methionine metabolism (ko00270);; Carbon metabolism (ko01200);; Biosynthesis of amino acids (ko01230)	[E]	Amino acid transport and metabolism	D-isomer specific 2-hydroxyacid dehydrogenase, NAD binding domain	D-3-phosphoglycerate dehydrogenase OS=Sus scrofa OX=9823 GN=PHGDH PE=3 SV=1	E	Amino acid transport and metabolism	D-3-phosphoglycerate dehydrogenase [Sus scrofa]	molecular function: catalytic activity (GO:0003824);; biological process: metabolic process (GO:0008152);; biological process: single-organism process (GO:0044699);; biological process: cellular process (GO:0009987);; molecular function: binding (GO:0005488)
ENSSSCG00000006788	ADORA3	1.71518	105	2.47274	137	0.856109	60	2.591	149	0.35566	28	0.561298	44	0.635188	49	0.418944	35	3.51244e-07	1.57839	up	--	--	Cellular Component: integral component of membrane (GO:0016021);;	K04268|1.3e-90|myb:102261536|K04268 adenosine receptor A3 | (RefSeq) ADORA3; adenosine A3 receptor	cGMP-PKG signaling pathway (ko04022);; Sphingolipid signaling pathway (ko04071);; Neuroactive ligand-receptor interaction (ko04080)	--	--	--	Polymeric immunoglobulin receptor OS=Bos taurus OX=9913 GN=PIGR PE=2 SV=1	T	Signal transduction mechanisms	transmembrane and immunoglobulin domain containing 3 isoform 2 precursor [Sus scrofa]	cellular component: membrane (GO:0016020);; cellular component: membrane part (GO:0044425)
ENSSSCG00000006796	CHI3L2	0.590422	51	0.828063	64	0.655646	53	0.651886	54	0.190712	17	0.275101	26	0.122641	11	0.387446	32	1.82307e-05	1.39757	up	[G]	Carbohydrate transport and metabolism	Cellular Component: extracellular region (GO:0005576);; Cellular Component: extracellular space (GO:0005615);; Biological Process: carbohydrate metabolic process (GO:0005975);; Biological Process: chitin catabolic process (GO:0006032);; Molecular Function: chitin binding (GO:0008061);;	K17523|1.7e-212|ssc:100037944|K17523 chitinase-3-like protein 1/2 | (RefSeq) CHI3L2; chitinase-3-like protein 2	--	[G]	Carbohydrate transport and metabolism	Glycosyl hydrolases family 18	Chitinase-3-like protein 1 OS=Sus scrofa OX=9823 GN=CHI3L1 PE=1 SV=2	G	Carbohydrate transport and metabolism	chitinase-3-like protein 2 [Sus scrofa]	cellular component: extracellular region (GO:0005576);; cellular component: extracellular region part (GO:0044421);; biological process: metabolic process (GO:0008152);; molecular function: binding (GO:0005488)
ENSSSCG00000006800	CD53	4.80696	371	5.39321	392	3.02931	231	4.47187	338	1.04381	85	2.01808	169	1.74879	142	2.25051	166	1.81507e-07	1.27915	up	--	--	Cellular Component: immunological synapse (GO:0001772);; Cellular Component: cell-cell junction (GO:0005911);; Cellular Component: integral component of membrane (GO:0016021);; Biological Process: positive regulation of myoblast fusion (GO:1901741);;	K06489|9.6e-119|ssc:100152398|K06489 CD53 antigen | (RefSeq) CD53; leukocyte surface antigen CD53	--	[R]	General function prediction only	Tetraspanin family	Leukocyte surface antigen CD53 OS=Bos taurus OX=9913 GN=CD53 PE=2 SV=1	S	Function unknown	leukocyte surface antigen CD53 [Sus scrofa]	cellular component: cell (GO:0005623);; cellular component: membrane (GO:0016020);; cellular component: membrane part (GO:0044425);; cellular component: cell part (GO:0044464);; cellular component: cell junction (GO:0030054);; biological process: biological regulation (GO:0065007)
ENSSSCG00000006811	SLC6A17	0.937391	253	0.894771	227	0.812162	217	1.00641	266	1.635	462	1.39901	408	1.4585	413	1.11403	287	8.57894e-05	-0.651728	down	[R]	General function prediction only	Cellular Component: integral component of plasma membrane (GO:0005887);; Biological Process: brain development (GO:0007420);; Molecular Function: symporter activity (GO:0015293);;	K05048|0.0e+00|ssc:100156430|K05048 solute carrier family 6 (neurotransmitter transporter, amino acid/orphan) member 15/16/17/18/20 | (RefSeq) SLC6A17; sodium-dependent neutral amino acid transporter SLC6A17	--	[T]	Signal transduction mechanisms	Sodium:neurotransmitter symporter family	Sodium-dependent neutral amino acid transporter B(0)AT2 OS=Pongo abelii OX=9601 GN=SLC6A15 PE=2 SV=2	T	Signal transduction mechanisms	sodium-dependent neutral amino acid transporter SLC6A17 [Sus scrofa]	cellular component: cell (GO:0005623);; cellular component: membrane (GO:0016020);; cellular component: membrane part (GO:0044425);; cellular component: cell part (GO:0044464);; biological process: multicellular organismal process (GO:0032501);; biological process: developmental process (GO:0032502);; biological process: single-organism process (GO:0044699);; molecular function: transporter activ…
ENSSSCG00000006862	VCAM1	61.4178	6646	60.8669	6189	48.2954	5159	54.3422	5748	32.0631	3633	27.1434	3175	29.9979	3408	30.871	3188	5.72744e-26	0.867382	up	--	--	Molecular Function: integrin binding (GO:0005178);; Cellular Component: integral component of plasma membrane (GO:0005887);; Biological Process: cell adhesion (GO:0007155);; Biological Process: cell-cell adhesion (GO:0098609);;	K06527|9.7e-306|ssc:396925|K06527 vascular cell adhesion molecule 1 | (RefSeq) VCAM1; vascular cell adhesion protein 1 precursor	NF-kappa B signaling pathway (ko04064);; Cell adhesion molecules (ko04514);; TNF signaling pathway (ko04668);; Leukocyte transendothelial migration (ko04670);; AGE-RAGE signaling pathway in diabetic complications (ko04933);; African trypanosomiasis (ko05143);; Malaria (ko05144);; Fluid shear stress and atherosclerosis (ko05418)	--	--	Immunoglobulin domain	Vascular cell adhesion protein 1 OS=Canis lupus familiaris OX=9615 GN=VCAM1 PE=2 SV=1	T	Signal transduction mechanisms	vascular cell adhesion protein 1 precursor [Sus scrofa]	molecular function: binding (GO:0005488);; cellular component: cell (GO:0005623);; cellular component: membrane (GO:0016020);; cellular component: membrane part (GO:0044425);; cellular component: cell part (GO:0044464);; biological process: biological adhesion (GO:0022610)
ENSSSCG00000006979	MSR1	10.1838	781	12.3886	815	9.56258	717	8.95029	616	2.48659	186	3.55757	261	4.31976	349	4.96872	316	2.54171e-14	1.43127	up	--	--	Molecular Function: scavenger receptor activity (GO:0005044);; Biological Process: receptor-mediated endocytosis (GO:0006898);; Cellular Component: integral component of membrane (GO:0016021);;	K06558|3.5e-148|ssc:100511665|K06558 macrophage scavenger receptor 1 | (RefSeq) MSR1; macrophage scavenger receptor types I and II	Phagosome (ko04145)	--	--	Macrophage scavenger receptor	Macrophage scavenger receptor types I and II OS=Oryctolagus cuniculus OX=9986 GN=MSR1 PE=2 SV=1	T	Signal transduction mechanisms	macrophage scavenger receptor types I and II [Sus scrofa]	molecular function: molecular transducer activity (GO:0060089);; biological process: localization (GO:0051179);; cellular component: membrane (GO:0016020);; cellular component: membrane part (GO:0044425)
ENSSSCG00000007063	ANKEF1	0.950092	158	1.13282	183	1.09177	180	0.546487	96	0.363751	77	0.521184	95	0.590898	118	0.606288	110	0.00893426	0.660972	up	--	--	--	--	--	[M]	Cell wall/membrane/envelope biogenesis	Ankyrin repeats (3 copies)	Ankyrin repeat and SOCS box protein 6 OS=Pongo abelii OX=9601 GN=ASB6 PE=2 SV=1	M	Cell wall/membrane/envelope biogenesis	ankyrin repeat and EF-hand domain-containing protein 1 isoform X1 [Sus scrofa]	--
ENSSSCG00000007084	BFSP1	0.708357	73	0.503673	49	0.542924	55	0.598856	60	1.79381	192	1.04734	116	1.21459	131	0.762259	75	8.2533e-05	-1.05996	down	--	--	Molecular Function: structural constituent of eye lens (GO:0005212);; Cellular Component: cytoplasm (GO:0005737);; Cellular Component: intermediate filament (GO:0005882);; Biological Process: cell maturation (GO:0048469);; Biological Process: lens fiber cell development (GO:0070307);;	K10378|2.4e-265|lve:103076386|K10378 filensin | (RefSeq) BFSP1; beaded filament structural protein 1	--	--	--	Intermediate filament protein	Filensin OS=Bos taurus OX=9913 GN=BFSP1 PE=1 SV=3	Z	Cytoskeleton	filensin isoform X2 [Sus scrofa]	molecular function: structural molecule activity (GO:0005198);; cellular component: cell (GO:0005623);; cellular component: cell part (GO:0044464);; cellular component: organelle (GO:0043226);; cellular component: organelle part (GO:0044422);; cellular component: supramolecular complex (GO:0099080);; biological process: cellular process (GO:0009987);; biological process: developmental process (GO…
ENSSSCG00000007085	DSTN	138.925	12649	145.055	12414	121.249	10876	143.066	12750	176.951	16827	199.34	19621	212.698	20309	224.059	19482	9.29071e-12	-0.605809	down	--	--	Molecular Function: actin binding (GO:0003779);; Cellular Component: actin cytoskeleton (GO:0015629);; Biological Process: actin filament depolymerization (GO:0030042);; Biological Process: positive regulation of actin filament depolymerization (GO:0030836);; Biological Process: actin filament severing (GO:0051014);;	K10363|9.4e-90|umr:103680516|K10363 destrin (actin-depolymerizing factor) | (RefSeq) DSTN; destrin, actin depolymerizing factor	--	[Z]	Cytoskeleton	Cofilin/tropomyosin-type actin-binding protein	Destrin OS=Bos taurus OX=9913 GN=DSTN PE=2 SV=3	Z	Cytoskeleton	DSTN [Cervus elaphus hippelaphus]	molecular function: binding (GO:0005488);; cellular component: cell (GO:0005623);; cellular component: organelle (GO:0043226);; cellular component: cell part (GO:0044464);; biological process: cellular process (GO:0009987);; biological process: single-organism process (GO:0044699);; biological process: cellular component organization or biogenesis (GO:0071840);; biological process: biological reg…
ENSSSCG00000007116	CD93	0.386414	94	0.303254	69	0.278897	67	0.384376	91	0.626047	159	0.539466	141	0.818902	208	0.62375	144	1.20347e-05	-0.977271	down	--	--	Molecular Function: complement component C1q binding (GO:0001849);; Molecular Function: calcium ion binding (GO:0005509);; Cellular Component: plasma membrane (GO:0005886);; Cellular Component: cell surface (GO:0009986);; Cellular Component: integral component of membrane (GO:0016021);; Cellular Component: cytoplasmic vesicle (GO:0031410);; Biological Process: cell-cell adhesion (GO:0098609);;	K06702|2.8e-307|ssc:100155660|K06702 CDW93 antigen | (RefSeq) CD93; complement component C1q receptor precursor	--	--	--	Complement Clr-like EGF-like	--	T	Signal transduction mechanisms	complement component C1q receptor isoform X1 [Sus scrofa]	molecular function: binding (GO:0005488);; cellular component: cell (GO:0005623);; cellular component: membrane (GO:0016020);; cellular component: cell part (GO:0044464);; cellular component: membrane part (GO:0044425);; cellular component: organelle (GO:0043226);; biological process: biological adhesion (GO:0022610)
ENSSSCG00000007139	ADRA1D	0.616952	47	0.363401	26	0.6657	50	0.663332	50	1.18019	94	0.788565	65	1.2168	97	0.912008	67	0.00180187	-0.852183	down	--	--	Biological Process: positive regulation of heart rate by epinephrine-norepinephrine (GO:0001996);; Molecular Function: G-protein coupled receptor activity (GO:0004930);; Molecular Function: alpha1-adrenergic receptor activity (GO:0004937);; Cellular Component: integral component of plasma membrane (GO:0005887);; Biological Process: adenylate cyclase-modulating G-protein coupled receptor signaling…	K04137|2.9e-292|ssc:552898|K04137 adrenergic receptor alpha-1D | (RefSeq) ADRA1D; alpha-1D adrenergic receptor	Calcium signaling pathway (ko04020);; cGMP-PKG signaling pathway (ko04022);; Neuroactive ligand-receptor interaction (ko04080);; Adrenergic signaling in cardiomyocytes (ko04261);; Vascular smooth muscle contraction (ko04270);; Salivary secretion (ko04970)	[R]	General function prediction only	7 transmembrane receptor (rhodopsin family)	Alpha-1D adrenergic receptor OS=Sus scrofa OX=9823 GN=ADRA1D PE=3 SV=1	T	Signal transduction mechanisms	alpha-1D adrenergic receptor [Sus scrofa]	biological process: biological regulation (GO:0065007);; molecular function: signal transducer activity (GO:0004871);; molecular function: molecular transducer activity (GO:0060089);; biological process: cellular process (GO:0009987);; biological process: signaling (GO:0023052);; biological process: single-organism process (GO:0044699);; biological process: response to stimulus (GO:0050896);; cel…
ENSSSCG00000007146	SIGLEC1	1.17089	404	1.88606	555	1.25387	397	1.3739	441	0.718303	254	0.63699	234	0.633579	228	0.832001	269	1.08791e-07	0.90947	up	--	--	Cellular Component: integral component of membrane (GO:0016021);;	K06548|0.0e+00|ssc:397623|K06548 sialoadhesin | (RefSeq) SIGLEC1; sialoadhesin precursor	Cell adhesion molecules (ko04514)	[RP]	General function prediction only;; Inorganic ion transport and metabolism	Immunoglobulin domain	Sialoadhesin OS=Sus scrofa OX=9823 GN=SIGLEC1 PE=1 SV=1	T	Signal transduction mechanisms	sialoadhesin isoform X1 [Sus scrofa]	cellular component: membrane (GO:0016020);; cellular component: membrane part (GO:0044425)
ENSSSCG00000007198	ANGPT4	1.4532	396	1.42204	364	1.15018	310	1.34791	359	0.776384	222	0.718843	212	0.840937	241	0.930264	242	2.73401e-05	0.678971	up	--	--	Biological Process: angiogenesis (GO:0001525);; Molecular Function: receptor tyrosine kinase binding (GO:0030971);;	K05467|5.7e-276|ssc:100515978|K05467 angiopoietin 4 | (RefSeq) ANGPT4; angiopoietin-4	MAPK signaling pathway (ko04010);; Ras signaling pathway (ko04014);; Rap1 signaling pathway (ko04015);; HIF-1 signaling pathway (ko04066);; PI3K-Akt signaling pathway (ko04151)	[R]	General function prediction only	Fibrinogen beta and gamma chains, C-terminal globular domain	Angiopoietin-4 OS=Bos taurus OX=9913 GN=ANGPT4 PE=2 SV=1	S	Function unknown	angiopoietin-4 [Sus scrofa]	biological process: developmental process (GO:0032502);; biological process: single-organism process (GO:0044699);; molecular function: binding (GO:0005488)
ENSSSCG00000007235	TPX2	6.31635	853	6.10409	765	6.69523	893	4.86428	647	14.5417	2048	8.2758	1212	9.56522	1381	5.54902	718	0.00043031	-0.702732	down	--	--	Cellular Component: spindle (GO:0005819);; Cellular Component: microtubule (GO:0005874);; Biological Process: activation of protein kinase activity (GO:0032147);; Biological Process: regulation of mitotic spindle organization (GO:0060236);;	K16812|0.0e+00|ssc:100525546|K16812 targeting protein for Xklp2 | (RefSeq) TPX2; targeting protein for Xklp2 isoform X1	--	--	--	Cell cycle regulated microtubule associated protein	Targeting protein for Xklp2 OS=Bos taurus OX=9913 GN=TPX2 PE=2 SV=1	S	Function unknown	targeting protein for Xklp2 isoform X1 [Sus scrofa]	cellular component: cell (GO:0005623);; cellular component: organelle (GO:0043226);; cellular component: organelle part (GO:0044422);; cellular component: cell part (GO:0044464);; cellular component: supramolecular complex (GO:0099080);; biological process: biological regulation (GO:0065007)
ENSSSCG00000007240	HCK	1.18156	121	1.86552	179	0.73111	74	1.11389	111	0.249187	27	0.619007	69	0.429799	46	0.28258	28	2.19518e-06	1.56609	up	[T]	Signal transduction mechanisms	Molecular Function: non-membrane spanning protein tyrosine kinase activity (GO:0004715);; Molecular Function: ATP binding (GO:0005524);;	K08893|3.5e-300|ssc:100526085|K08893 hemopoietic cell kinase [EC:2.7.10.2] | (RefSeq) HCK; tyrosine-protein kinase HCK isoform X1	Chemokine signaling pathway (ko04062);; Fc gamma R-mediated phagocytosis (ko04666);; Kaposi sarcoma-associated herpesvirus infection (ko05167)	[T]	Signal transduction mechanisms	Protein tyrosine and serine/threonine kinase	Tyrosine-protein kinase HCK OS=Macaca fascicularis OX=9541 GN=HCK PE=2 SV=3	T	Signal transduction mechanisms	tyrosine-protein kinase HCK isoform X1 [Sus scrofa]	molecular function: catalytic activity (GO:0003824);; biological process: metabolic process (GO:0008152);; biological process: cellular process (GO:0009987);; molecular function: binding (GO:0005488)
ENSSSCG00000007286	ACSS2	68.721	8840	72.3377	8747	82.2104	10441	65.1117	8186	34.4299	4637	29.13	4050	33.0148	4460	38.0223	4666	9.11641e-30	1.06384	up	[I]	Lipid transport and metabolism	Molecular Function: acetate-CoA ligase activity (GO:0003987);; Cellular Component: nucleoplasm (GO:0005654);; Cellular Component: cytosol (GO:0005829);; Biological Process: acetyl-CoA biosynthetic process (GO:0006085);; Biological Process: lipid biosynthetic process (GO:0008610);; Molecular Function: propionate-CoA ligase activity (GO:0050218);;	K01895|0.0e+00|ssc:100153866|K01895 acetyl-CoA synthetase [EC:6.2.1.1] | (RefSeq) ACSS2; acetyl-coenzyme A synthetase, cytoplasmic	Glycolysis / Gluconeogenesis (ko00010);; Pyruvate metabolism (ko00620);; Glyoxylate and dicarboxylate metabolism (ko00630);; Propanoate metabolism (ko00640);; Carbon metabolism (ko01200)	[I]	Lipid transport and metabolism	AMP-binding enzyme	Acyl-CoA synthetase short-chain family member 3, mitochondrial OS=Pongo abelii OX=9601 GN=ACSS3 PE=2 SV=1	I	Lipid transport and metabolism	acetyl-coenzyme A synthetase, cytoplasmic isoform X1 [Sus scrofa]	molecular function: catalytic activity (GO:0003824);; cellular component: cell (GO:0005623);; cellular component: organelle (GO:0043226);; cellular component: organelle part (GO:0044422);; cellular component: cell part (GO:0044464);; biological process: metabolic process (GO:0008152);; biological process: cellular process (GO:0009987);; biological process: single-organism process (GO:0044699)
ENSSSCG00000007336	ENSSSCG00000007336	20.5828	1127	18.7427	997	28.6536	1625	16.6682	935	13.2146	798	10.627	665	12.8521	690	14.7368	733	1.66261e-06	0.739632	up	--	--	Biological Process: brain development (GO:0007420);;	--	--	--	--	--	Neuronatin OS=Bos taurus OX=9913 GN=NNAT PE=3 SV=1	T	Signal transduction mechanisms	neuronatin isoform X1 [Camelus dromedarius]	biological process: multicellular organismal process (GO:0032501);; biological process: developmental process (GO:0032502);; biological process: single-organism process (GO:0044699)
ENSSSCG00000007346	ADIG	7.72504	258	11.1993	351	8.83662	291	7.60268	248	5.80984	203	3.87782	140	3.80766	134	4.18881	134	2.10557e-06	0.959222	up	--	--	Cellular Component: nucleus (GO:0005634);; Cellular Component: cytoplasm (GO:0005737);; Cellular Component: lipid droplet (GO:0005811);; Biological Process: spermatogenesis (GO:0007283);; Cellular Component: integral component of membrane (GO:0016021);; Biological Process: positive regulation of fat cell differentiation (GO:0045600);; Biological Process: white fat cell differentiation (GO:0050872…	K21409|2.3e-41|ssc:641357|K21409 adipogenin | (RefSeq) ADIG; adipogenin	--	--	--	Adipogenin	Adipogenin OS=Sus scrofa OX=9823 GN=ADIG PE=3 SV=1	S	Function unknown	adipogenin [Sus scrofa]	cellular component: cell (GO:0005623);; cellular component: organelle (GO:0043226);; cellular component: cell part (GO:0044464);; biological process: reproduction (GO:0000003);; biological process: reproductive process (GO:0022414);; biological process: multicellular organismal process (GO:0032501);; biological process: single-organism process (GO:0044699);; biological process: multi-organism pro…
ENSSSCG00000007351	FAM83D	0.710062	149	0.440386	103	0.618588	151	0.5618	136	1.52602	395	0.941992	252	0.983228	255	0.479031	113	0.00252013	-0.848725	down	--	--	Cellular Component: spindle pole (GO:0000922);; Biological Process: epithelial to mesenchymal transition (GO:0001837);; Biological Process: regulation of protein phosphorylation (GO:0001932);; Molecular Function: molecular_function (GO:0003674);; Molecular Function: binding (GO:0005488);; Molecular Function: protein binding (GO:0005515);; Cellular Component: cellular_component (GO:0005575);; Cell…	K16805|8.1e-298|ssc:102164658|K16805 protein FAM83D | (RefSeq) FAM83D; protein FAM83D	--	--	--	FAM83 A-H	Protein FAM83D OS=Bos taurus OX=9913 GN=FAM83D PE=2 SV=1	S	Function unknown	protein FAM83D [Sus scrofa]	cellular component: cell (GO:0005623);; cellular component: organelle (GO:0043226);; cellular component: organelle part (GO:0044422);; cellular component: cell part (GO:0044464);; biological process: cellular process (GO:0009987);; biological process: multicellular organismal process (GO:0032501);; biological process: developmental process (GO:0032502);; biological process: single-organism proces…
ENSSSCG00000007358	EMILIN3	1.41822	154	1.39826	143	0.745218	80	1.42729	152	0.681934	78	0.396089	47	0.720329	82	0.706343	74	0.000400323	0.950574	up	--	--	Cellular Component: cytoplasm (GO:0005737);;	K24358|7.5e-17|umr:103670200|K24358 collagen type XXVI alpha (EMI domain-containing protein 2) | (RefSeq) COL26A1; collagen type XXVI alpha 1 chain	Protein digestion and absorption (ko04974)	--	--	EMI domain	--	S	Function unknown	EMILIN-3 [Sus scrofa]	cellular component: cell (GO:0005623);; cellular component: cell part (GO:0044464)
ENSSSCG00000007435	PLTP	40.6366	3492	44.5873	3597	45.3195	3844	40.6535	3412	23.8489	2138	22.4749	2088	25.4149	2293	27.5823	2262	6.69428e-19	0.749572	up	--	--	Cellular Component: extracellular space (GO:0005615);; Biological Process: lipid metabolic process (GO:0006629);; Molecular Function: phosphatidylethanolamine binding (GO:0008429);; Molecular Function: phosphatidylcholine transporter activity (GO:0008525);; Biological Process: vitamin E biosynthetic process (GO:0010189);; Biological Process: positive regulation of cholesterol efflux (GO:0010875);…	K08761|6.7e-277|ssc:397527|K08761 phospholipid transfer protein | (RefSeq) PLTP; phospholipid transfer protein precursor	PPAR signaling pathway (ko03320);; Cholesterol metabolism (ko04979)	[V]	Defense mechanisms	LBP / BPI / CETP family, C-terminal domain	Bactericidal permeability-increasing protein (Fragment) OS=Oryctolagus cuniculus OX=9986 GN=BPI PE=2 SV=1	V	Defense mechanisms	phospholipid transfer protein isoform X1 [Sus scrofa]	cellular component: extracellular region (GO:0005576);; cellular component: extracellular region part (GO:0044421);; biological process: metabolic process (GO:0008152);; biological process: single-organism process (GO:0044699);; molecular function: binding (GO:0005488);; molecular function: transporter activity (GO:0005215);; biological process: localization (GO:0051179);; biological process: cel…
ENSSSCG00000007436	MMP9	89.0712	9360	92.2846	9074	83.5918	8804	88.6605	9072	24.4791	2694	32.5814	3658	37.5439	4158	41.1724	4066	7.37003e-29	1.35311	up	[O]	Posttranslational modification, protein turnover, chaperones	Molecular Function: metalloendopeptidase activity (GO:0004222);; Molecular Function: zinc ion binding (GO:0008270);; Cellular Component: extracellular matrix (GO:0031012);;	K01403|0.0e+00|ssc:654325|K01403 matrix metalloproteinase-9 (gelatinase B) [EC:3.4.24.35] | (RefSeq) MMP9; matrix metalloproteinase-9 precursor	Endocrine resistance (ko01522);; IL-17 signaling pathway (ko04657);; TNF signaling pathway (ko04668);; Leukocyte transendothelial migration (ko04670);; Estrogen signaling pathway (ko04915);; Relaxin signaling pathway (ko04926);; Hepatitis B (ko05161);; Pathways in cancer (ko05200);; Transcriptional misregulation in cancer (ko05202);; Proteoglycans in cancer (ko05205);; MicroRNAs in cancer (ko0520…	[OW]	Posttranslational modification, protein turnover, chaperones;; Extracellular structures	Matrixin	Matrix metalloproteinase-9 OS=Bos taurus OX=9913 GN=MMP9 PE=2 SV=1	--	--	matrix metalloproteinase-9 precursor [Sus scrofa]	molecular function: catalytic activity (GO:0003824);; biological process: metabolic process (GO:0008152);; molecular function: binding (GO:0005488);; cellular component: extracellular region (GO:0005576);; cellular component: extracellular region part (GO:0044421)
ENSSSCG00000007439	CDH22	0.594372	87	0.843904	115	0.623693	90	0.626325	89	0.350057	55	0.439396	71	0.45517	70	0.39585	57	0.00592182	0.637433	up	--	--	Molecular Function: calcium ion binding (GO:0005509);; Biological Process: homophilic cell adhesion via plasma membrane adhesion molecules (GO:0007156);; Cellular Component: integral component of membrane (GO:0016021);; Cellular Component: catenin complex (GO:0016342);; Molecular Function: cadherin binding (GO:0045296);; Biological Process: cell-cell adhesion via plasma-membrane adhesion molecule…	K06812|0.0e+00|ssc:100153556|K06812 cadherin 22 | (RefSeq) CDH22; cadherin-22	--	[S]	Function unknown	Cadherin domain	Cadherin-6 OS=Bos taurus OX=9913 GN=CDH6 PE=2 SV=1	S	Function unknown	cadherin-22 [Sus scrofa]	molecular function: binding (GO:0005488);; biological process: biological adhesion (GO:0022610);; cellular component: membrane (GO:0016020);; cellular component: membrane part (GO:0044425);; cellular component: cell (GO:0005623);; cellular component: macromolecular complex (GO:0032991);; cellular component: cell part (GO:0044464)
ENSSSCG00000007476	KCNG1	0.212363	47	0.084268	18	0.150295	33	0.140944	31	0.429543	99	0.2769	66	0.219073	51	0.23601	50	0.00157573	-0.995326	down	[T]	Signal transduction mechanisms	Molecular Function: voltage-gated potassium channel activity (GO:0005249);; Molecular Function: delayed rectifier potassium channel activity (GO:0005251);; Cellular Component: voltage-gated potassium channel complex (GO:0008076);; Cellular Component: integral component of membrane (GO:0016021);; Biological Process: protein homooligomerization (GO:0051260);; Biological Process: potassium ion trans…	K04900|1.0e-296|ssc:100134965|K04900 potassium voltage-gated channel subfamily G member 1 | (RefSeq) KCNG1; potassium voltage-gated channel subfamily G member 1	--	[P]	Inorganic ion transport and metabolism	Ion transport protein	Potassium voltage-gated channel subfamily B member 2 OS=Bos taurus OX=9913 GN=KCNB2 PE=2 SV=1	P	Inorganic ion transport and metabolism	potassium voltage-gated channel subfamily G member 1 [Sus scrofa]	molecular function: transporter activity (GO:0005215);; biological process: cellular process (GO:0009987);; biological process: single-organism process (GO:0044699);; biological process: localization (GO:0051179);; biological process: biological regulation (GO:0065007);; cellular component: cell (GO:0005623);; cellular component: membrane (GO:0016020);; cellular component: macromolecular complex …
ENSSSCG00000007493	ENSSSCG00000007493	3.06033	311	2.87627	274	3.32805	333	2.43612	241	6.51933	692	4.65417	512	4.14985	442	3.13264	305	0.000433302	-0.694426	down	[T]	Signal transduction mechanisms	Biological Process: meiotic spindle organization (GO:0000212);; Molecular Function: protein serine/threonine kinase activity (GO:0004674);; Molecular Function: ATP binding (GO:0005524);; Biological Process: mitotic spindle organization (GO:0007052);; Biological Process: mitotic centrosome separation (GO:0007100);;	K11481|1.2e-220|ssc:574063|K11481 aurora kinase A [EC:2.7.11.1] | (RefSeq) AURKA; aurora kinase A	Oocyte meiosis (ko04114);; Progesterone-mediated oocyte maturation (ko04914)	[D]	Cell cycle control, cell division, chromosome partitioning	Protein kinase domain	Aurora kinase A OS=Sus scrofa OX=9823 GN=AURKA PE=3 SV=1	D	Cell cycle control, cell division, chromosome partitioning	aurora kinase A isoform X1 [Sus scrofa]	biological process: reproduction (GO:0000003);; biological process: cellular process (GO:0009987);; biological process: reproductive process (GO:0022414);; biological process: single-organism process (GO:0044699);; biological process: cellular component organization or biogenesis (GO:0071840);; molecular function: catalytic activity (GO:0003824);; biological process: metabolic process (GO:0008152…
ENSSSCG00000007522	CTSZ	143.745	8149	158.102	8421	154.121	8625	132.514	7343	90.1179	5350	94.3204	5781	92.4399	5501	96.1309	5201	3.3105e-17	0.619857	up	[O]	Posttranslational modification, protein turnover, chaperones	Molecular Function: carboxypeptidase activity (GO:0004180);; Molecular Function: cysteine-type endopeptidase activity (GO:0004197);; Cellular Component: extracellular space (GO:0005615);; Cellular Component: lysosome (GO:0005764);; Cellular Component: endoplasmic reticulum (GO:0005783);; Biological Process: negative regulation of plasminogen activation (GO:0010757);; Cellular Component: cytoplasm…	K08568|1.4e-181|ssc:100141405|K08568 cathepsin X [EC:3.4.18.1] | (RefSeq) CTSZ; cathepsin Z precursor	Lysosome (ko04142);; Apoptosis (ko04210)	[O]	Posttranslational modification, protein turnover, chaperones	Papain family cysteine protease	Cathepsin Z OS=Bos taurus OX=9913 GN=CTSZ PE=2 SV=2	O	Posttranslational modification, protein turnover, chaperones	cathepsin Z precursor [Sus scrofa]	molecular function: catalytic activity (GO:0003824);; biological process: metabolic process (GO:0008152);; cellular component: extracellular region (GO:0005576);; cellular component: extracellular region part (GO:0044421);; cellular component: cell (GO:0005623);; cellular component: organelle (GO:0043226);; cellular component: cell part (GO:0044464);; biological process: biological regulation (GO…
ENSSSCG00000007552	ENSSSCG00000007552	3.04149	194	3.12053	187	1.86981	118	2.66329	166	0.806467	54	1.32307	92	1.00425	68	1.41521	86	1.88124e-06	1.18367	up	--	--	Cellular Component: integral component of membrane (GO:0016021);;	K08431|1.6e-16|myb:102252956|K08431 G protein-coupled receptor 146 | (RefSeq) GPR146; G protein-coupled receptor 146	--	--	--	--	--	--	--	uncharacterized protein LOC102162791 isoform X1 [Sus scrofa]	cellular component: membrane (GO:0016020);; cellular component: membrane part (GO:0044425)
ENSSSCG00000007649	GPC2	0.63843	71	0.69261	72	0.567205	62	0.478097	52	0.360172	42	0.340805	41	0.255511	30	0.369444	39	0.0022502	0.797539	up	--	--	Cellular Component: extracellular region (GO:0005576);; Cellular Component: endoplasmic reticulum (GO:0005783);; Biological Process: smoothened signaling pathway (GO:0007224);; Biological Process: regulation of signal transduction (GO:0009966);; Cellular Component: cell surface (GO:0009986);; Biological Process: cell migration (GO:0016477);; Cellular Component: synapse (GO:0045202);; Cellular Com…	K08108|0.0e+00|ssc:100511316|K08108 glypican 2 | (RefSeq) GPC2; glypican-2	--	[T]	Signal transduction mechanisms	Glypican	Glypican-6 OS=Pongo abelii OX=9601 GN=GPC6 PE=2 SV=1	T	Signal transduction mechanisms	glypican-2 [Sus scrofa]	cellular component: extracellular region (GO:0005576);; cellular component: cell (GO:0005623);; cellular component: organelle (GO:0043226);; cellular component: cell part (GO:0044464);; biological process: cellular process (GO:0009987);; biological process: signaling (GO:0023052);; biological process: single-organism process (GO:0044699);; biological process: response to stimulus (GO:0050896);; b…
ENSSSCG00000007665	ENSSSCG00000007665	1.04764	121	1.15695	125	1.13156	129	1.31732	148	0.518879	63	0.540895	68	0.51909	63	0.459616	51	8.66703e-08	1.14274	up	--	--	Molecular Function: insulin receptor binding (GO:0005158);; Cellular Component: cytosol (GO:0005829);; Cellular Component: plasma membrane (GO:0005886);; Biological Process: insulin receptor signaling pathway (GO:0008286);; Molecular Function: phosphatidylinositol 3-kinase binding (GO:0043548);;	K17445|6.2e-294|ssc:100515824|K17445 insulin receptor substrate 3 | (RefSeq) insulin receptor substrate 1-like isoform X1	cGMP-PKG signaling pathway (ko04022);; FoxO signaling pathway (ko04068);; Autophagy - animal (ko04140);; AMPK signaling pathway (ko04152);; Longevity regulating pathway (ko04211);; Longevity regulating pathway - multiple species (ko04213);; Insulin signaling pathway (ko04910);; Adipocytokine signaling pathway (ko04920);; Regulation of lipolysis in adipocytes (ko04923);; Type II diabetes mellitus …	--	--	PTB domain (IRS-1 type)	Insulin receptor substrate 1 OS=Chlorocebus aethiops OX=9534 GN=IRS1 PE=2 SV=1	T	Signal transduction mechanisms	insulin receptor substrate 1-like isoform X2 [Sus scrofa]	molecular function: binding (GO:0005488);; cellular component: cell (GO:0005623);; cellular component: cell part (GO:0044464);; cellular component: membrane (GO:0016020);; biological process: cellular process (GO:0009987);; biological process: signaling (GO:0023052);; biological process: single-organism process (GO:0044699);; biological process: response to stimulus (GO:0050896);; biological proc…
ENSSSCG00000007682	SH2B2	1.53306	160	1.56465	153	2.20464	227	2.05475	209	0.96464	105	0.869502	98	1.53421	168	1.0314	103	0.00307617	0.707935	up	--	--	Biological Process: signal transduction (GO:0007165);; Molecular Function: signaling adaptor activity (GO:0035591);;	K07193|0.0e+00|ssc:100519708|K07193 SH2B adapter protein 2 | (RefSeq) SH2B2; SH2B adapter protein 2 isoform X2	Neurotrophin signaling pathway (ko04722);; Insulin signaling pathway (ko04910)	--	--	Phenylalanine zipper	SHC-transforming protein 1 OS=Bos taurus OX=9913 GN=SHC1 PE=2 SV=1	T	Signal transduction mechanisms	SH2B adapter protein 2 isoform X2 [Sus scrofa]	biological process: cellular process (GO:0009987);; biological process: biological regulation (GO:0065007);; molecular function: binding (GO:0005488)
ENSSSCG00000007710	MLXIPL	7.12121	1025	7.17429	1002	8.16799	1197	6.79037	964	2.4557	375	2.71974	424	2.20307	345	3.3532	474	2.03454e-23	1.40868	up	--	--	Molecular Function: protein dimerization activity (GO:0046983);;	K09113|0.0e+00|ssc:100170769|K09113 MAX-like protein X | (RefSeq) MLXIPL; carbohydrate-responsive element-binding protein isoform X4	Insulin resistance (ko04931);; Non-alcoholic fatty liver disease (ko04932)	[K]	Transcription	Helix-loop-helix DNA-binding domain	--	K	Transcription	carbohydrate-responsive element-binding protein isoform X5 [Sus scrofa]	molecular function: binding (GO:0005488)
ENSSSCG00000007717	METTL27	3.73288	189	2.23562	106	1.42722	71	2.0967	104	1.58001	84	1.49946	82	1.47681	79	0.933232	45	0.00999718	0.741483	up	[H]	Coenzyme transport and metabolism	Molecular Function: methyltransferase activity (GO:0008168);;	K22438|6.0e-06|amex:103038316|K22438 trans-aconitate 3-methyltransferase [EC:2.1.1.145] | (RefSeq) putative methyltransferase DDB_G0268948	--	[R]	General function prediction only	Methyltransferase domain	--	Q	Secondary metabolites biosynthesis, transport and catabolism	methyltransferase like 27 [Rhinolophus ferrumequinum]	molecular function: catalytic activity (GO:0003824)
ENSSSCG00000007754	ITGAM	2.00241	487	2.99034	685	1.98599	476	2.22658	528	0.656271	166	0.880311	231	0.902209	228	1.11428	260	2.86689e-12	1.33626	up	--	--	Biological Process: cell adhesion (GO:0007155);; Biological Process: integrin-mediated signaling pathway (GO:0007229);; Cellular Component: integrin complex (GO:0008305);;	K06461|0.0e+00|ssc:397459|K06461 integrin alpha M | (RefSeq) ITGAM; integrin alpha-M isoform X2	Rap1 signaling pathway (ko04015);; Phagosome (ko04145);; Cell adhesion molecules (ko04514);; Complement and coagulation cascades (ko04610);; Hematopoietic cell lineage (ko04640);; Leukocyte transendothelial migration (ko04670);; Regulation of actin cytoskeleton (ko04810);; Pertussis (ko05133);; Legionellosis (ko05134);; Leishmaniasis (ko05140);; Amoebiasis (ko05146);; Staphylococcus aureus infect…	[W]	Extracellular structures	Integrin alpha	Integrin alpha-L OS=Bos taurus OX=9913 GN=ITGAL PE=1 SV=1	W	Extracellular structures	integrin alpha-M isoform X1 [Sus scrofa]	biological process: biological adhesion (GO:0022610);; biological process: cellular process (GO:0009987);; biological process: signaling (GO:0023052);; biological process: single-organism process (GO:0044699);; biological process: response to stimulus (GO:0050896);; biological process: biological regulation (GO:0065007);; cellular component: cell (GO:0005623);; cellular component: membrane (GO:00…
ENSSSCG00000007857	ACSM3	0.631611	72	0.499926	54	0.596055	67	0.409305	46	0.195364	24	0.218302	27	0.265399	32	0.139522	16	5.01574e-06	1.31449	up	[I]	Lipid transport and metabolism	Molecular Function: acyl-CoA ligase activity (GO:0003996);; Molecular Function: fatty-acyl-CoA synthase activity (GO:0004321);; Cellular Component: mitochondrial matrix (GO:0005759);; Biological Process: fatty acid biosynthetic process (GO:0006633);; Biological Process: acyl-CoA metabolic process (GO:0006637);; Molecular Function: fatty acid ligase activity (GO:0015645);; Molecular Function: prop…	K01896|0.0e+00|ssc:100512220|K01896 medium-chain acyl-CoA synthetase [EC:6.2.1.2] | (RefSeq) ACSM3; acyl-coenzyme A synthetase ACSM3, mitochondrial isoform X1	Butanoate metabolism (ko00650)	[I]	Lipid transport and metabolism	AMP-binding enzyme	Acyl-coenzyme A synthetase ACSM3, mitochondrial OS=Pongo abelii OX=9601 GN=ACSM3 PE=2 SV=1	I	Lipid transport and metabolism	acyl-coenzyme A synthetase ACSM3, mitochondrial isoform X1 [Sus scrofa]	molecular function: catalytic activity (GO:0003824);; cellular component: cell (GO:0005623);; cellular component: membrane-enclosed lumen (GO:0031974);; cellular component: organelle (GO:0043226);; cellular component: organelle part (GO:0044422);; cellular component: cell part (GO:0044464);; biological process: metabolic process (GO:0008152);; biological process: cellular process (GO:0009987);; b…
ENSSSCG00000007899	ENSSSCG00000007899	0.376543	190	0.346679	164	0.409811	204	0.246091	121	0.149937	79	0.111366	61	0.165663	88	0.095605	46	2.95826e-08	1.35688	up	--	--	Molecular Function: lipid transporter activity (GO:0005319);;	K05669|1.6e-71|pmur:107289980|K05669 ATP-binding cassette, subfamily C (CFTR/MRP), member 6 | (RefSeq) LOW QUALITY PROTEIN: multidrug resistance-associated protein 1-like	ABC transporters (ko02010)	--	--	Lipoprotein amino terminal region	von Willebrand factor OS=Canis lupus familiaris OX=9615 GN=VWF PE=1 SV=2	I	Lipid transport and metabolism	uncharacterized protein LOC115867587 [Globicephala melas]	molecular function: transporter activity (GO:0005215);; biological process: localization (GO:0051179)
ENSSSCG00000007944	ENSSSCG00000007944	2.79274	596	2.56888	512	2.67819	570	2.893	593	1.70255	380	1.47699	346	1.85746	419	1.97644	397	1.07099e-05	0.599026	up	[R]	General function prediction only	Cellular Component: Golgi apparatus (GO:0005794);; Biological Process: actin filament organization (GO:0007015);; Biological Process: Golgi organization (GO:0007030);; Cellular Component: integral component of membrane (GO:0016021);; Biological Process: cell migration (GO:0016477);; Biological Process: establishment of cell polarity (GO:0030010);; Molecular Function: actin filament binding (GO:00…	K18619|0.0e+00|ssc:100513346|K18619 coronin-7 | (RefSeq) coronin-7 isoform X1	--	[Z]	Cytoskeleton	Type of WD40 repeat	Coronin-7 OS=Bos taurus OX=9913 GN=CORO7 PE=2 SV=1	Z	Cytoskeleton	coronin-7 isoform X1 [Sus scrofa]	cellular component: cell (GO:0005623);; cellular component: organelle (GO:0043226);; cellular component: cell part (GO:0044464);; biological process: cellular process (GO:0009987);; biological process: single-organism process (GO:0044699);; biological process: cellular component organization or biogenesis (GO:0071840);; cellular component: membrane (GO:0016020);; cellular component: membrane part…
ENSSSCG00000007998	RHBDL1	5.08687	353	4.87114	318	5.10777	350	4.45791	302	3.79548	276	3.17306	238	2.98606	218	1.83235	122	0.000655089	0.689244	up	--	--	Molecular Function: serine-type endopeptidase activity (GO:0004252);; Cellular Component: integral component of membrane (GO:0016021);;	K02857|6.5e-216|aml:100474967|K02857 rhomboid-related protein 1/2/3 [EC:3.4.21.105] | (RefSeq) RHBDL1; rhomboid-related protein 1 isoform X1	--	[T]	Signal transduction mechanisms	Rhomboid family	--	T	Signal transduction mechanisms	rhomboid-related protein 1 isoform X6 [Sus scrofa]	molecular function: catalytic activity (GO:0003824);; biological process: metabolic process (GO:0008152);; cellular component: membrane (GO:0016020);; cellular component: membrane part (GO:0044425)
ENSSSCG00000008090	IL1A	2.26248	174	1.64531	119	2.70605	205	1.3344	101	0.944185	76	0.652128	54	1.01544	82	1.02989	76	3.41756e-05	1.09023	up	--	--	Biological Process: fever generation (GO:0001660);; Molecular Function: cytokine activity (GO:0005125);; Molecular Function: interleukin-1 receptor binding (GO:0005149);; Cellular Component: extracellular space (GO:0005615);; Cellular Component: cytosol (GO:0005829);; Biological Process: immune response (GO:0006955);; Biological Process: positive regulation of cell division (GO:0051781);;	K04383|1.8e-151|ssc:397094|K04383 interleukin 1 alpha | (RefSeq) IL1A; interleukin-1 alpha precursor	MAPK signaling pathway (ko04010);; Cytokine-cytokine receptor interaction (ko04060);; Necroptosis (ko04217);; Cellular senescence (ko04218);; Osteoclast differentiation (ko04380);; Hematopoietic cell lineage (ko04640);; Non-alcoholic fatty liver disease (ko04932);; AGE-RAGE signaling pathway in diabetic complications (ko04933);; Type I diabetes mellitus (ko04940);; Alzheimer disease (ko05010);; P…	--	--	Interleukin-1 propeptide	Interleukin-1 alpha OS=Sus scrofa OX=9823 GN=IL1A PE=2 SV=1	K	Transcription	interleukin-1 alpha precursor [Sus scrofa]	biological process: multicellular organismal process (GO:0032501);; biological process: single-organism process (GO:0044699);; biological process: response to stimulus (GO:0050896);; biological process: biological regulation (GO:0065007);; molecular function: binding (GO:0005488);; cellular component: extracellular region (GO:0005576);; cellular component: extracellular region part (GO:0044421);;…
ENSSSCG00000008103	MERTK	0.699365	157	1.11777	237	0.82599	184	0.730927	161	0.380011	90	0.381896	93	0.608989	144	0.427807	92	0.000236815	0.866311	up	[P]	Inorganic ion transport and metabolism	Biological Process: natural killer cell differentiation (GO:0001779);; Biological Process: negative regulation of cytokine production (GO:0001818);; Molecular Function: transmembrane receptor protein tyrosine kinase activity (GO:0004714);; Molecular Function: ATP binding (GO:0005524);; Cellular Component: extracellular space (GO:0005615);; Cellular Component: cytoplasm (GO:0005737);; Cellular Com…	K05117|0.0e+00|ssc:100519652|K05117 c-mer proto-oncogene tyrosine kinase [EC:2.7.10.1] | (RefSeq) MERTK; tyrosine-protein kinase Mer	--	--	--	Protein tyrosine and serine/threonine kinase	Hepatocyte growth factor receptor OS=Otolemur garnettii OX=30611 GN=MET PE=3 SV=1	T	Signal transduction mechanisms	tyrosine-protein kinase Mer [Sus scrofa]	biological process: immune system process (GO:0002376);; biological process: cellular process (GO:0009987);; biological process: multicellular organismal process (GO:0032501);; biological process: developmental process (GO:0032502);; biological process: single-organism process (GO:0044699);; biological process: biological regulation (GO:0065007);; molecular function: catalytic activity (GO:000382…
ENSSSCG00000008147	FHL2	24.5075	2761	20.3374	2158	19.7699	2205	21.604	2380	36.4343	4295	32.0597	3902	31.6014	3743	27.9247	3009	1.22723e-11	-0.605318	down	--	--	Molecular Function: metal ion binding (GO:0046872);;	K14380|3.3e-141|ssc:100513532|K14380 four and a half LIM domains protein 2 | (RefSeq) FHL2; four and a half LIM domains protein 2	Osteoclast differentiation (ko04380)	[TZR]	Signal transduction mechanisms;; Cytoskeleton;; General function prediction only	LIM domain	Four and a half LIM domains protein 2 OS=Bos taurus OX=9913 GN=FHL2 PE=2 SV=1	K	Transcription	four and a half LIM domains protein 2 [Sus scrofa]	molecular function: binding (GO:0005488)
ENSSSCG00000008187	ENSSSCG00000008187	5.21553	944	4.43571	754	4.96895	887	4.60259	814	1.99628	378	2.29426	449	2.54748	484	3.08236	532	9.33737e-11	0.916959	up	--	--	--	--	--	--	--	Domain of unknown function (DUF4592)	--	S	Function unknown	uncharacterized protein KIAA1211-like homolog isoform X3 [Sus scrofa]	--
ENSSSCG00000008227	ST3GAL5	1.935	281	2.92281	384	2.35451	337	2.53226	360	1.35377	206	1.23135	193	1.38972	212	1.09497	152	7.55105e-07	0.889493	up	--	--	Cellular Component: Golgi apparatus (GO:0005794);; Biological Process: protein glycosylation (GO:0006486);; Cellular Component: integral component of membrane (GO:0016021);; Molecular Function: lactosylceramide alpha-2,3-sialyltransferase activity (GO:0047291);;	K03370|4.0e-246|ssc:100625751|K03370 lactosylceramide alpha-2,3-sialyltransferase (sialyltransferase 9) [EC:2.4.99.9] | (RefSeq) ST3GAL5; lactosylceramide alpha-2,3-sialyltransferase isoform X1	Glycosphingolipid biosynthesis - ganglio series (ko00604)	[G]	Carbohydrate transport and metabolism	Glycosyltransferase family 29 (sialyltransferase)	Lactosylceramide alpha-2,3-sialyltransferase OS=Bos taurus OX=9913 GN=ST3GAL5 PE=2 SV=2	G	Carbohydrate transport and metabolism	lactosylceramide alpha-2,3-sialyltransferase isoform X1 [Sus scrofa]	cellular component: cell (GO:0005623);; cellular component: organelle (GO:0043226);; cellular component: cell part (GO:0044464);; biological process: metabolic process (GO:0008152);; biological process: cellular process (GO:0009987);; biological process: single-organism process (GO:0044699);; cellular component: membrane (GO:0016020);; cellular component: membrane part (GO:0044425);; molecular fu…
ENSSSCG00000008294	ACTG2	374.673	24273	310.937	24486	348.802	28899	302.419	24759	499.313	33510	679.282	48443	576.454	49316	912.216	55685	1.52044e-09	-0.8338	down	[Z]	Cytoskeleton	Molecular Function: ATP binding (GO:0005524);; Cellular Component: cytoplasm (GO:0005737);; Cellular Component: actin cytoskeleton (GO:0015629);; Cellular Component: cell periphery (GO:0071944);;	K12315|1.1e-219|sbq:101029098|K12315 actin, gamma-enteric smooth muscle | (RefSeq) ACTG2; actin, gamma-enteric smooth muscle isoform X1	Vascular smooth muscle contraction (ko04270)	[Z]	Cytoskeleton	Actin	Actin, gamma-enteric smooth muscle OS=Bos taurus OX=9913 GN=ACTG2 PE=2 SV=1	Z	Cytoskeleton	hypothetical protein CB1_000252031 [Camelus ferus]	molecular function: binding (GO:0005488);; cellular component: cell (GO:0005623);; cellular component: cell part (GO:0044464);; cellular component: organelle (GO:0043226)
ENSSSCG00000008307	SFXN5	1.41778	240	1.19229	189	1.23419	205	0.987656	163	0.789681	140	0.579924	106	0.779886	139	0.812118	131	0.000963512	0.664408	up	--	--	Molecular Function: ion transmembrane transporter activity (GO:0015075);; Cellular Component: integral component of membrane (GO:0016021);;	K23503|9.1e-163|ssc:100621633|K23503 sideroflexin-5 | (RefSeq) SFXN5; sideroflexin-5	--	[R]	General function prediction only	Sideroflexins	Sideroflexin-1 OS=Ovis aries OX=9940 GN=SFXN1 PE=2 SV=1	S	Function unknown	sideroflexin-5 isoform X3 [Zalophus californianus]	molecular function: transporter activity (GO:0005215);; biological process: localization (GO:0051179);; cellular component: membrane (GO:0016020);; cellular component: membrane part (GO:0044425)
ENSSSCG00000008344	ARHGAP25	0.931039	145	0.777513	126	0.749432	131	0.697072	121	0.234819	44	0.170584	34	0.230924	43	0.344952	59	1.03426e-10	1.56901	up	--	--	Cellular Component: phagocytic cup (GO:0001891);; Molecular Function: GTPase activator activity (GO:0005096);; Biological Process: phagocytosis, engulfment (GO:0006911);; Biological Process: actin filament organization (GO:0007015);; Biological Process: signal transduction (GO:0007165);; Biological Process: negative regulation of small GTPase mediated signal transduction (GO:0051058);;	K20642|0.0e+00|ssc:100514401|K20642 Rho GTPase-activating protein 22/24/25 | (RefSeq) ARHGAP25; rho GTPase-activating protein 25 isoform X3	--	[T]	Signal transduction mechanisms	RhoGAP domain	Active breakpoint cluster region-related protein OS=Bos taurus OX=9913 GN=ABR PE=2 SV=1	T	Signal transduction mechanisms	rho GTPase-activating protein 25 isoform X4 [Sus scrofa]	cellular component: cell (GO:0005623);; cellular component: membrane (GO:0016020);; cellular component: membrane part (GO:0044425);; cellular component: cell part (GO:0044464);; molecular function: molecular function regulator (GO:0098772);; biological process: biological regulation (GO:0065007);; biological process: cellular process (GO:0009987);; biological process: cellular component organizat…
ENSSSCG00000008348	PLEK	2.02758	288	2.16533	289	1.63519	231	1.27076	177	0.234252	57	0.41289	100	0.566513	85	0.618414	84	7.40796e-12	1.63195	up	--	--	Biological Process: intracellular signal transduction (GO:0035556);;	K19993|1.0e-198|ssc:100516257|K19993 pleckstrin | (RefSeq) PLEK; pleckstrin	--	--	--	PH domain	Pleckstrin OS=Canis lupus familiaris OX=9615 GN=PLEK PE=2 SV=1	T	Signal transduction mechanisms	pleckstrin [Sus scrofa]	biological process: cellular process (GO:0009987);; biological process: signaling (GO:0023052);; biological process: single-organism process (GO:0044699);; biological process: response to stimulus (GO:0050896);; biological process: biological regulation (GO:0065007)
ENSSSCG00000008421	ENSSSCG00000008421	1.37763	135	1.11485	102	1.55843	147	1.23159	112	0.843982	85	0.45672	51	0.650737	70	0.795881	74	0.0002405	0.862695	up	--	--	Molecular Function: luteinizing hormone receptor activity (GO:0004964);; Cellular Component: integral component of membrane (GO:0016021);;	K04248|2.7e-83|ssc:407247|K04248 lutropin-choriogonadotropic hormone receptor | (RefSeq) LHCGR; lutropin-choriogonadotropic hormone receptor precursor	Calcium signaling pathway (ko04020);; cAMP signaling pathway (ko04024);; Neuroactive ligand-receptor interaction (ko04080);; Ovarian steroidogenesis (ko04913);; Prolactin signaling pathway (ko04917)	[T]	Signal transduction mechanisms	Leucine rich repeat	Lutropin-choriogonadotropic hormone receptor OS=Sus scrofa OX=9823 GN=LHCGR PE=2 SV=1	T	Signal transduction mechanisms	luteinizing hormone receptor precursor variant 1 [Sus scrofa]	molecular function: signal transducer activity (GO:0004871);; molecular function: molecular transducer activity (GO:0060089);; biological process: cellular process (GO:0009987);; biological process: signaling (GO:0023052);; biological process: single-organism process (GO:0044699);; biological process: response to stimulus (GO:0050896);; biological process: biological regulation (GO:0065007);; cel…
ENSSSCG00000008509	RASGRP3	0.52442	99	0.580052	103	0.695921	129	0.722455	132	0.414654	80	0.395947	81	0.379433	75	0.39037	71	0.00323222	0.640586	up	--	--	Molecular Function: Ras guanyl-nucleotide exchange factor activity (GO:0005088);; Molecular Function: GTPase activator activity (GO:0005096);; Molecular Function: calcium ion binding (GO:0005509);; Biological Process: Ras protein signal transduction (GO:0007265);; Molecular Function: kinase binding (GO:0019900);; Cellular Component: guanyl-nucleotide exchange factor complex (GO:0032045);; Cellula…	K12362|0.0e+00|ssc:100511446|K12362 RAS guanyl-releasing protein 3 | (RefSeq) RASGRP3; ras guanyl-releasing protein 3 isoform X1	MAPK signaling pathway (ko04010);; Ras signaling pathway (ko04014);; Rap1 signaling pathway (ko04015);; B cell receptor signaling pathway (ko04662);; Pathways in cancer (ko05200)	[T]	Signal transduction mechanisms	RasGEF domain	RAS guanyl-releasing protein 2 OS=Bos taurus OX=9913 GN=RASGRP2 PE=2 SV=1	T	Signal transduction mechanisms	ras guanyl-releasing protein 3 isoform X1 [Sus scrofa]	molecular function: molecular function regulator (GO:0098772);; biological process: biological regulation (GO:0065007);; molecular function: binding (GO:0005488);; biological process: cellular process (GO:0009987);; biological process: signaling (GO:0023052);; biological process: single-organism process (GO:0044699);; biological process: response to stimulus (GO:0050896);; cellular component: cel…
ENSSSCG00000008603	MATN3	1.25959	95	1.00194	71	0.606778	45	0.842009	62	2.04953	161	1.47394	120	1.87038	147	2.34085	168	1.31432e-05	-1.09306	down	--	--	Biological Process: growth plate cartilage chondrocyte morphogenesis (GO:0003429);; Molecular Function: calcium ion binding (GO:0005509);; Cellular Component: extracellular space (GO:0005615);;	K19467|2.5e-183|ssc:100516005|K19467 matrilin-3 | (RefSeq) MATN3; matrilin-3	--	[T]	Signal transduction mechanisms	von Willebrand factor type A domain	--	T	Signal transduction mechanisms	matrilin-3 [Sus scrofa]	biological process: cellular process (GO:0009987);; biological process: multicellular organismal process (GO:0032501);; biological process: developmental process (GO:0032502);; biological process: growth (GO:0040007);; biological process: single-organism process (GO:0044699);; biological process: cellular component organization or biogenesis (GO:0071840);; molecular function: binding (GO:0005488)…
ENSSSCG00000008617	FAM49A	4.76913	789	4.78196	751	5.14467	835	4.63894	751	3.14208	546	2.91092	525	2.69348	473	3.19325	506	1.85872e-08	0.652061	up	--	--	Biological Process: regulation of actin filament polymerization (GO:0030833);; Molecular Function: Rac GTPase binding (GO:0048365);;	--	--	[S]	Function unknown	Protein of unknown function (DUF1394)	CYFIP-related Rac1 interactor A OS=Bos taurus OX=9913 GN=CYRIA PE=2 SV=1	S	Function unknown	protein FAM49A isoform X1 [Loxodonta africana]	biological process: cellular process (GO:0009987);; biological process: single-organism process (GO:0044699);; biological process: biological regulation (GO:0065007);; biological process: cellular component organization or biogenesis (GO:0071840);; molecular function: binding (GO:0005488)
ENSSSCG00000008624	LPIN1	19.7022	4757	23.1131	4326	22.2857	4586	21.4183	4265	10.219	2774	10.7866	2906	10.4328	2824	11.6007	2884	2.74646e-21	0.696062	up	--	--	Biological Process: regulation of transcription from RNA polymerase II promoter (GO:0006357);; Molecular Function: phosphatidate phosphatase activity (GO:0008195);; Biological Process: fatty acid catabolic process (GO:0009062);; Biological Process: triglyceride biosynthetic process (GO:0019432);;	K15728|0.0e+00|ssc:100170845|K15728 phosphatidate phosphatase LPIN [EC:3.1.3.4] | (RefSeq) LPIN1; phosphatidate phosphatase LPIN1	Glycerolipid metabolism (ko00561);; Glycerophospholipid metabolism (ko00564);; mTOR signaling pathway (ko04150)	[NI]	Cell motility;; Lipid transport and metabolism	LNS2 (Lipin/Ned1/Smp2)	--	--	--	phosphatidate phosphatase LPIN1 isoform X2 [Sus scrofa]	biological process: biological regulation (GO:0065007);; molecular function: catalytic activity (GO:0003824);; biological process: metabolic process (GO:0008152);; biological process: cellular process (GO:0009987);; biological process: single-organism process (GO:0044699)
ENSSSCG00000008647	CMPK2	5.27708	673	3.92814	471	4.03388	508	3.46948	433	8.89446	1188	3.86597	533	6.61274	885	7.03644	857	0.000383186	-0.695606	down	--	--	Molecular Function: nucleoside phosphate kinase activity (GO:0050145);;	K13809|1.2e-248|ssc:100623872|K13809 UMP-CMP kinase 2, mitochondrial [EC:2.7.4.14] | (RefSeq) CMPK2; UMP-CMP kinase 2, mitochondrial	Pyrimidine metabolism (ko00240)	[F]	Nucleotide transport and metabolism	Thymidylate kinase	--	F	Nucleotide transport and metabolism	UMP-CMP kinase 2, mitochondrial [Sus scrofa]	molecular function: catalytic activity (GO:0003824);; biological process: metabolic process (GO:0008152);; biological process: cellular process (GO:0009987)
ENSSSCG00000008648	RSAD2	0.74057	91	1.02174	118	0.786176	91	0.338569	41	4.77054	604	0.962941	128	2.77848	357	2.6513	310	2.14058e-07	-1.9911	down	[R]	General function prediction only	Cellular Component: fibrillar center (GO:0001650);; Molecular Function: catalytic activity (GO:0003824);; Cellular Component: mitochondrial outer membrane (GO:0005741);; Cellular Component: mitochondrial inner membrane (GO:0005743);; Cellular Component: endoplasmic reticulum membrane (GO:0005789);; Cellular Component: lipid droplet (GO:0005811);; Biological Process: positive regulation of toll-li…	K15045|2.2e-213|ssc:396752|K15045 radical S-adenosyl methionine domain-containing protein 2 | (RefSeq) RSAD2; radical S-adenosyl methionine domain-containing protein 2	Hepatitis C (ko05160);; Influenza A (ko05164)	--	--	Radical SAM superfamily	Radical S-adenosyl methionine domain-containing protein 2 OS=Sus scrofa OX=9823 GN=RSAD2 PE=2 SV=1	T	Signal transduction mechanisms	inflammatory response protein 6 [Sus scrofa]	cellular component: cell (GO:0005623);; cellular component: membrane-enclosed lumen (GO:0031974);; cellular component: organelle (GO:0043226);; cellular component: organelle part (GO:0044422);; cellular component: cell part (GO:0044464);; molecular function: catalytic activity (GO:0003824);; cellular component: membrane (GO:0016020);; cellular component: membrane part (GO:0044425);; biological pr…
ENSSSCG00000008649	SOX11	1.12453	81	0.617471	42	0.653481	47	0.925896	66	0.517464	39	0.453474	36	0.343064	26	0.418001	29	0.00199412	0.89988	up	--	--	Biological Process: negative regulation of transcription from RNA polymerase II promoter (GO:0000122);; Molecular Function: transcription regulatory region sequence-specific DNA binding (GO:0000976);; Molecular Function: RNA polymerase II core promoter proximal region sequence-specific DNA binding (GO:0000978);; Molecular Function: RNA polymerase II transcription factor activity, sequence-specifi…	K09268|1.1e-193|ssc:100514639|K09268 transcription factor SOX11/12 (SOX group C) | (RefSeq) SOX11; transcription factor SOX-11	--	[K]	Transcription	HMG (high mobility group) box	Transcription factor SOX-14 OS=Macaca fascicularis OX=9541 GN=SOX14 PE=2 SV=1	K	Transcription	transcription factor SOX-11 [Sus scrofa]	biological process: biological regulation (GO:0065007);; molecular function: binding (GO:0005488);; molecular function: nucleic acid binding transcription factor activity (GO:0001071);; biological process: multicellular organismal process (GO:0032501);; biological process: developmental process (GO:0032502);; biological process: single-organism process (GO:0044699);; biological process: cellular …
ENSSSCG00000008722	SH3TC1	0.84898	163	0.579911	105	0.459257	87	0.861447	161	0.466524	94	0.293185	61	0.343577	69	0.240784	44	0.000265809	0.99582	up	--	--	Molecular Function: protein binding (GO:0005515);;	K24313|0.0e+00|ssc:100737944|K24313 SH3 domain and tetratricopeptide repeat-containing protein | (RefSeq) SH3TC1; LOW QUALITY PROTEIN: SH3 domain and tetratricopeptide repeat-containing protein 1	--	--	--	Tetratricopeptide repeat	--	T	Signal transduction mechanisms	LOW QUALITY PROTEIN: SH3 domain and tetratricopeptide repeat-containing protein 1 [Sus scrofa]	molecular function: binding (GO:0005488)
ENSSSCG00000008737	C1QTNF7	4.98439	377	5.21585	457	5.10071	433	5.02224	362	2.26269	227	4.19306	337	2.37849	245	3.05939	274	0.000235348	0.632925	up	--	--	Cellular Component: extracellular region (GO:0005576);; Cellular Component: collagen trimer (GO:0005581);;	K07296|3.7e-25|acyg:106040284|K07296 adiponectin | (RefSeq) ADIPOQ; adiponectin	PPAR signaling pathway (ko03320);; Adipocytokine signaling pathway (ko04920)	--	--	C1q domain	Collagen alpha-1(X) chain OS=Bos taurus OX=9913 GN=COL10A1 PE=2 SV=1	W	Extracellular structures	complement C1q tumor necrosis factor-related protein 7 isoform X2 [Sus scrofa]	cellular component: extracellular region (GO:0005576);; cellular component: macromolecular complex (GO:0032991)
ENSSSCG00000008747	NCAPG	0.974253	345	0.761218	266	1.00001	301	0.789255	260	2.58254	953	1.52167	541	2.43538	523	0.953974	322	4.66242e-05	-0.937973	down	--	--	Cellular Component: condensin complex (GO:0000796);; Biological Process: mitotic chromosome condensation (GO:0007076);;	K06678|0.0e+00|ssc:100513670|K06678 condensin complex subunit 3 | (RefSeq) NCAPG; condensin complex subunit 3	--	[BD]	Chromatin structure and dynamics;; Cell cycle control, cell division, chromosome partitioning	Nuclear condensing complex subunits, C-term domain	--	--	--	condensin complex subunit 3 [Sus scrofa]	cellular component: cell (GO:0005623);; cellular component: macromolecular complex (GO:0032991);; cellular component: organelle (GO:0043226);; cellular component: organelle part (GO:0044422);; cellular component: cell part (GO:0044464);; biological process: cellular process (GO:0009987);; biological process: single-organism process (GO:0044699);; biological process: cellular component organizatio…
ENSSSCG00000008769	ENSSSCG00000008769	1.06831	71	1.27867	80	0.938156	62	1.435	94	0.276162	20	0.486362	35	0.438511	31	0.394763	26	7.57143e-08	1.49871	up	--	--	Cellular Component: lysosomal membrane (GO:0005765);; Cellular Component: integral component of membrane (GO:0016021);;	K06501|1.3e-201|ssc:100520753|K06501 CD68 antigen | (RefSeq) macrosialin isoform X2	Lysosome (ko04142)	[R]	General function prediction only	Lysosome-associated membrane glycoprotein (Lamp)	--	S	Function unknown	macrosialin isoform X2 [Sus scrofa]	cellular component: cell (GO:0005623);; cellular component: membrane (GO:0016020);; cellular component: organelle (GO:0043226);; cellular component: organelle part (GO:0044422);; cellular component: cell part (GO:0044464);; cellular component: membrane part (GO:0044425)
ENSSSCG00000008796	RBM47	0.394122	95	0.561251	112	0.689221	146	0.547373	123	0.240227	61	0.22041	51	0.226946	58	0.176208	39	2.53196e-07	1.23944	up	--	--	Biological Process: hematopoietic progenitor cell differentiation (GO:0002244);; Molecular Function: RNA binding (GO:0003723);; Molecular Function: mRNA binding (GO:0003729);; Cellular Component: nucleus (GO:0005634);; Biological Process: cytidine to uridine editing (GO:0016554);;	K11972|2.9e-246|sasa:106570794|K11972 E3 ubiquitin-protein ligase RNF19A [EC:2.3.2.31] | (RefSeq) uncharacterized LOC106570794	--	[A]	RNA processing and modification	RNA recognition motif. (a.k.a. RRM, RBD, or RNP domain)	RNA-binding protein 47 OS=Pongo abelii OX=9601 GN=RBM47 PE=2 SV=2	A	RNA processing and modification	RNA-binding protein 47 isoform X1 [Sus scrofa]	biological process: cellular process (GO:0009987);; biological process: developmental process (GO:0032502);; biological process: single-organism process (GO:0044699);; molecular function: binding (GO:0005488);; cellular component: cell (GO:0005623);; cellular component: organelle (GO:0043226);; cellular component: cell part (GO:0044464);; biological process: metabolic process (GO:0008152)
ENSSSCG00000008838	LNX1	0.931987	112	1.06134	119	1.46039	174	0.867518	105	0.699259	88	0.781113	102	0.681305	87	0.500387	70	0.00918856	0.605542	up	--	--	Molecular Function: ubiquitin-protein transferase activity (GO:0004842);; Cellular Component: cytoplasm (GO:0005737);; Biological Process: ubiquitin-dependent protein catabolic process (GO:0006511);; Molecular Function: PDZ domain binding (GO:0030165);; Molecular Function: identical protein binding (GO:0042802);;	K10692|0.0e+00|ssc:100523319|K10692 ligand of Numb protein X 1/2 [EC:2.3.2.27] | (RefSeq) LNX1; E3 ubiquitin-protein ligase LNX isoform X1	--	[S]	Function unknown	PDZ domain	Harmonin OS=Bos taurus OX=9913 GN=USH1C PE=2 SV=1	T	Signal transduction mechanisms	E3 ubiquitin-protein ligase LNX isoform X2 [Sus scrofa]	molecular function: catalytic activity (GO:0003824);; cellular component: cell (GO:0005623);; cellular component: cell part (GO:0044464);; biological process: metabolic process (GO:0008152);; biological process: cellular process (GO:0009987);; molecular function: binding (GO:0005488)
ENSSSCG00000008937	AMBN	0.795894	54	0.950488	75	0.572107	48	0.506981	42	0.153031	14	0.209772	16	0.329243	30	0.07767	7	7.16899e-07	1.75709	up	--	--	Molecular Function: structural constituent of tooth enamel (GO:0030345);; Biological Process: odontogenesis of dentin-containing tooth (GO:0042475);;	K23442|2.1e-223|ssc:397102|K23442 ameloblastin | (RefSeq) AMBN; ameloblastin precursor	--	--	--	Ameloblastin precursor (Amelin)	Ameloblastin OS=Sus scrofa OX=9823 GN=AMBN PE=1 SV=1	T	Signal transduction mechanisms	ameloblastin precursor [Sus scrofa]	molecular function: structural molecule activity (GO:0005198);; biological process: multicellular organismal process (GO:0032501);; biological process: developmental process (GO:0032502);; biological process: single-organism process (GO:0044699)
ENSSSCG00000008953	CXCL8	3.33669	228	2.6682	175	3.0035	197	2.74822	183	0.872101	63	1.23762	91	1.68796	119	0.762268	50	8.62807e-08	1.3273	up	--	--	Molecular Function: interleukin-8 receptor binding (GO:0005153);; Cellular Component: extracellular space (GO:0005615);; Biological Process: inflammatory response (GO:0006954);; Biological Process: immune response (GO:0006955);; Biological Process: cell cycle arrest (GO:0007050);; Molecular Function: chemokine activity (GO:0008009);; Biological Process: regulation of cell adhesion (GO:0030155);; …	K10030|1.8e-45|ssc:396880|K10030 interleukin 8 | (RefSeq) CXCL8; interleukin-8 precursor	Cytokine-cytokine receptor interaction (ko04060);; Viral protein interaction with cytokine and cytokine receptor (ko04061);; Chemokine signaling pathway (ko04062);; NF-kappa B signaling pathway (ko04064);; Phospholipase D signaling pathway (ko04072);; Cellular senescence (ko04218);; Toll-like receptor signaling pathway (ko04620);; NOD-like receptor signaling pathway (ko04621);; RIG-I-like recepto…	--	--	Small cytokines (intecrine/chemokine), interleukin-8 like	Interleukin-8 OS=Sus scrofa OX=9823 GN=CXCL8 PE=1 SV=1	T	Signal transduction mechanisms	interleukin-8 precursor [Sus scrofa]	molecular function: binding (GO:0005488);; cellular component: extracellular region (GO:0005576);; cellular component: extracellular region part (GO:0044421);; biological process: response to stimulus (GO:0050896);; biological process: immune system process (GO:0002376);; biological process: cellular process (GO:0009987);; biological process: single-organism process (GO:0044699);; biological proc…
ENSSSCG00000008959	CXCL2	3.73747	187	4.11047	190	3.75583	190	3.87677	180	2.97573	156	2.19557	112	2.39277	118	2.26835	109	0.000904308	0.640632	up	--	--	Cellular Component: extracellular space (GO:0005615);; Biological Process: defense response (GO:0006952);; Biological Process: immune response (GO:0006955);; Molecular Function: chemokine activity (GO:0008009);;	K05505|3.5e-50|ssc:414904|K05505 C-X-C motif chemokine 1/2/3 | (RefSeq) CXCL2; C-X-C motif chemokine 2 precursor	Cytokine-cytokine receptor interaction (ko04060);; Viral protein interaction with cytokine and cytokine receptor (ko04061);; Chemokine signaling pathway (ko04062);; NF-kappa B signaling pathway (ko04064);; NOD-like receptor signaling pathway (ko04621);; IL-17 signaling pathway (ko04657);; TNF signaling pathway (ko04668);; Legionellosis (ko05134);; Amoebiasis (ko05146);; Kaposi sarcoma-associated …	--	--	Small cytokines (intecrine/chemokine), interleukin-8 like	Growth-regulated protein homolog alpha OS=Bos taurus OX=9913 PE=3 SV=1	T	Signal transduction mechanisms	chemokine (C-X-C motif) ligand 2 [Sus scrofa]	cellular component: extracellular region (GO:0005576);; cellular component: extracellular region part (GO:0044421);; biological process: response to stimulus (GO:0050896);; biological process: immune system process (GO:0002376);; molecular function: binding (GO:0005488)
ENSSSCG00000008965	ENSSSCG00000008965	8.93139	1103	11.1514	1302	9.50846	1156	9.26166	1118	4.36245	563	4.16064	555	4.70962	610	4.22879	496	2.96821e-24	1.12075	up	--	--	Molecular Function: epidermal growth factor receptor binding (GO:0005154);; Cellular Component: extracellular space (GO:0005615);; Biological Process: epidermal growth factor receptor signaling pathway (GO:0007173);; Molecular Function: growth factor activity (GO:0008083);; Biological Process: positive regulation of cell proliferation (GO:0008284);; Cellular Component: integral component of membr…	K09783|1.1e-68|ssc:100505411|K09783 betacellulin | (RefSeq) BTC; probetacellulin isoform X10	ErbB signaling pathway (ko04012)	--	--	EGF-like domain	Probetacellulin OS=Bos taurus OX=9913 GN=BTC PE=2 SV=1	T	Signal transduction mechanisms	probetacellulin isoform X2 [Sus scrofa]	molecular function: binding (GO:0005488);; cellular component: extracellular region (GO:0005576);; cellular component: extracellular region part (GO:0044421);; biological process: cellular process (GO:0009987);; biological process: signaling (GO:0023052);; biological process: single-organism process (GO:0044699);; biological process: response to stimulus (GO:0050896);; biological process: biologi…
ENSSSCG00000008966	PARM1	3.7397	792	3.2043	638	5.59692	1170	3.73818	774	1.98471	440	2.54047	582	2.51861	560	3.08553	624	0.000281459	0.649789	up	--	--	Cellular Component: nucleoplasm (GO:0005654);; Cellular Component: early endosome (GO:0005769);; Cellular Component: late endosome (GO:0005770);; Cellular Component: Golgi apparatus (GO:0005794);; Cellular Component: cytosol (GO:0005829);; Cellular Component: plasma membrane (GO:0005886);; Cellular Component: integral component of membrane (GO:0016021);;	K22022|6.3e-12|cmk:103177639|K22022 mucin-21 | (RefSeq) parm1; prostate androgen-regulated mucin-like protein 1	--	--	--	PARM	Prostate androgen-regulated mucin-like protein 1 homolog OS=Pongo abelii OX=9601 GN=PARM1 PE=2 SV=1	S	Function unknown	prostate androgen-regulated mucin-like protein 1 precursor [Sus scrofa]	cellular component: cell (GO:0005623);; cellular component: organelle (GO:0043226);; cellular component: organelle part (GO:0044422);; cellular component: cell part (GO:0044464);; cellular component: membrane (GO:0016020);; cellular component: membrane part (GO:0044425)
ENSSSCG00000009002	TLR2	2.13917	445	1.58632	427	1.13296	368	1.26038	391	0.512139	202	1.02489	217	1.03803	277	1.02197	257	1.21381e-06	0.81266	up	--	--	Biological Process: response to molecule of bacterial origin (GO:0002237);; Biological Process: MyD88-dependent toll-like receptor signaling pathway (GO:0002755);; Molecular Function: transmembrane signaling receptor activity (GO:0004888);; Biological Process: inflammatory response (GO:0006954);; Cellular Component: integral component of membrane (GO:0016021);; Biological Process: toll-like recep…	K10159|0.0e+00|ssc:396623|K10159 toll-like receptor 2 | (RefSeq) TLR2; toll-like receptor 2 precursor	Phagosome (ko04145);; PI3K-Akt signaling pathway (ko04151);; Toll-like receptor signaling pathway (ko04620);; Salmonella infection (ko05132);; Legionellosis (ko05134);; Leishmaniasis (ko05140);; Chagas disease (ko05142);; Malaria (ko05144);; Toxoplasmosis (ko05145);; Amoebiasis (ko05146);; Tuberculosis (ko05152);; Hepatitis B (ko05161);; Measles (ko05162);; Herpes simplex virus 1 infection (ko051…	[T]	Signal transduction mechanisms	Leucine rich repeat	Toll-like receptor 2 OS=Giraffa camelopardalis OX=9894 GN=TLR2 PE=3 SV=1	T	Signal transduction mechanisms	toll-like receptor 2 isoform X1 [Sus scrofa]	biological process: response to stimulus (GO:0050896);; biological process: immune system process (GO:0002376);; biological process: cellular process (GO:0009987);; biological process: signaling (GO:0023052);; biological process: single-organism process (GO:0044699);; biological process: biological regulation (GO:0065007);; molecular function: signal transducer activity (GO:0004871);; molecular f…
ENSSSCG00000009132	ENPEP	2.64879	380	3.19606	431	2.94954	408	2.96407	411	1.64254	248	1.28655	196	1.11129	191	1.50973	203	3.62877e-10	1.0056	up	[E]	Amino acid transport and metabolism	Cellular Component: cytoplasm (GO:0005737);; Biological Process: proteolysis (GO:0006508);; Molecular Function: zinc ion binding (GO:0008270);; Cellular Component: integral component of membrane (GO:0016021);; Molecular Function: peptide binding (GO:0042277);; Biological Process: peptide catabolic process (GO:0043171);; Molecular Function: metalloaminopeptidase activity (GO:0070006);;	K11141|0.0e+00|ssc:397080|K11141 glutamyl aminopeptidase [EC:3.4.11.7] | (RefSeq) ENPEP; glutamyl aminopeptidase	Renin-angiotensin system (ko04614)	[EO]	Amino acid transport and metabolism;; Posttranslational modification, protein turnover, chaperones	Peptidase family M1 domain	Glutamyl aminopeptidase OS=Sus scrofa OX=9823 GN=ENPEP PE=1 SV=1	--	--	glutamyl aminopeptidase [Sus scrofa]	cellular component: cell (GO:0005623);; cellular component: cell part (GO:0044464);; biological process: metabolic process (GO:0008152);; molecular function: binding (GO:0005488);; cellular component: membrane (GO:0016020);; cellular component: membrane part (GO:0044425);; biological process: cellular process (GO:0009987);; molecular function: catalytic activity (GO:0003824)
ENSSSCG00000009169	SLC39A8	1.47541	138	2.79097	219	2.00225	185	1.57412	144	1.19168	117	0.977178	99	1.09367	108	1.19949	107	0.00131273	0.716403	up	[P]	Inorganic ion transport and metabolism	Cellular Component: integral component of membrane (GO:0016021);; Molecular Function: metal ion transmembrane transporter activity (GO:0046873);;	K14714|8.7e-263|ssc:100524695|K14714 solute carrier family 39 (zinc transporter), member 8 | (RefSeq) SLC39A8; zinc transporter ZIP8	Ferroptosis (ko04216)	[P]	Inorganic ion transport and metabolism	ZIP Zinc transporter	Metal cation symporter ZIP14 OS=Bos taurus OX=9913 GN=SLC39A14 PE=2 SV=1	P	Inorganic ion transport and metabolism	zinc transporter ZIP8 [Sus scrofa]	cellular component: membrane (GO:0016020);; cellular component: membrane part (GO:0044425);; molecular function: transporter activity (GO:0005215);; biological process: localization (GO:0051179)
ENSSSCG00000009178	H2AFZ	68.4269	2854	61.1609	2397	43.8802	1807	68.4956	2792	109.225	4770	92.6145	4175	91.7476	4017	71.9025	2862	1.52288e-06	-0.630931	down	--	--	Cellular Component: nucleosome (GO:0000786);; Cellular Component: nuclear chromatin (GO:0000790);; Molecular Function: RNA polymerase II core promoter proximal region sequence-specific DNA binding (GO:0000978);; Molecular Function: RNA polymerase II core promoter sequence-specific DNA binding (GO:0000979);; Molecular Function: DNA binding (GO:0003677);; Cellular Component: nuclear euchromatin (GO…	K11251|4.4e-63|aju:106978991|K11251 histone H2A | (RefSeq) histone H2A.Z	Necroptosis (ko04217);; Alcoholism (ko05034);; Systemic lupus erythematosus (ko05322)	[B]	Chromatin structure and dynamics	Core histone H2A/H2B/H3/H4	Histone H2A.Z OS=Bos taurus OX=9913 GN=H2AZ1 PE=1 SV=2	B	Chromatin structure and dynamics	histone H2A.Z [Ovis aries]	cellular component: cell (GO:0005623);; cellular component: macromolecular complex (GO:0032991);; cellular component: organelle (GO:0043226);; cellular component: organelle part (GO:0044422);; cellular component: cell part (GO:0044464);; cellular component: membrane-enclosed lumen (GO:0031974);; molecular function: binding (GO:0005488);; biological process: cellular process (GO:0009987);; biologi…
ENSSSCG00000009192	PDLIM5	15.4465	3667	14.3112	3184	15.3362	3568	15.9093	3673	21.106	5247	23.119	5925	22.7925	5662	23.6771	5346	1.19472e-15	-0.610872	down	--	--	Molecular Function: metal ion binding (GO:0046872);;	K19867|0.0e+00|ssc:100515041|K19867 LIM domain-binding protein 3 | (RefSeq) PDLIM5; PDZ and LIM domain protein 5 isoform X1	--	[TZ]	Signal transduction mechanisms;; Cytoskeleton	LIM domain	PDZ and LIM domain protein 7 OS=Bos taurus OX=9913 GN=PDLIM7 PE=2 SV=1	--	--	PDZ and LIM domain protein 5 isoform X8 [Sus scrofa]	molecular function: binding (GO:0005488)
ENSSSCG00000009231	CDS1	0.259332	52	0.381533	72	0.29735	59	0.53676	87	0.119137	25	0.199647	43	0.09857	20	0.125728	16	6.85887e-06	1.43336	up	[I]	Lipid transport and metabolism	Molecular Function: phosphatidate cytidylyltransferase activity (GO:0004605);; Cellular Component: integral component of membrane (GO:0016021);; Biological Process: CDP-diacylglycerol biosynthetic process (GO:0016024);;	K00981|9.6e-262|ssc:733582|K00981 phosphatidate cytidylyltransferase [EC:2.7.7.41] | (RefSeq) CDS1; phosphatidate cytidylyltransferase 1	Glycerophospholipid metabolism (ko00564);; Phosphatidylinositol signaling system (ko04070)	[I]	Lipid transport and metabolism	Cytidylyltransferase family	Phosphatidate cytidylyltransferase 2 OS=Bos taurus OX=9913 GN=CDS2 PE=2 SV=1	I	Lipid transport and metabolism	phosphatidate cytidylyltransferase 1 [Sus scrofa]	molecular function: catalytic activity (GO:0003824);; cellular component: membrane (GO:0016020);; cellular component: membrane part (GO:0044425);; biological process: metabolic process (GO:0008152);; biological process: cellular process (GO:0009987);; biological process: single-organism process (GO:0044699)
ENSSSCG00000009237	HPSE	7.79282	1264	7.78585	1254	6.80862	1152	7.00628	1174	3.76302	658	4.17528	749	5.44857	823	4.44542	728	4.09078e-13	0.75383	up	--	--	Cellular Component: nucleoplasm (GO:0005654);; Cellular Component: lysosome (GO:0005764);; Biological Process: cell-matrix adhesion (GO:0007160);; Biological Process: positive regulation of vascular endothelial growth factor production (GO:0010575);; Biological Process: positive regulation of blood coagulation (GO:0030194);; Biological Process: heparan sulfate proteoglycan catabolic process (GO:0…	K07964|0.0e+00|ssc:100271932|K07964 heparanase [EC:3.2.1.166] | (RefSeq) HPSE; heparanase precursor	Glycosaminoglycan degradation (ko00531);; Proteoglycans in cancer (ko05205)	--	--	Glycosyl hydrolase family 79, N-terminal domain	Heparanase OS=Bos taurus OX=9913 GN=HPSE PE=2 SV=2	T	Signal transduction mechanisms	heparanase precursor [Sus scrofa]	cellular component: cell (GO:0005623);; cellular component: organelle (GO:0043226);; cellular component: organelle part (GO:0044422);; cellular component: cell part (GO:0044464);; biological process: biological adhesion (GO:0022610);; biological process: biological regulation (GO:0065007);; biological process: metabolic process (GO:0008152);; biological process: cellular process (GO:0009987);; bi…
ENSSSCG00000009240	ENSSSCG00000009240	3.50108	136	2.67704	100	1.905	80	2.95289	108	6.49373	317	5.51188	236	4.95006	215	6.70295	251	1.04483e-08	-1.22402	down	--	--	Cellular Component: lytic vacuole (GO:0000323);; Biological Process: cell activation (GO:0001775);; Biological Process: immune effector process (GO:0002252);; Biological Process: cell activation involved in immune response (GO:0002263);; Biological Process: myeloid leukocyte activation (GO:0002274);; Biological Process: myeloid cell activation involved in immune response (GO:0002275);; Biological…	--	--	--	--	PLAC8 family	Placenta-specific gene 8 protein OS=Bos taurus OX=9913 GN=PLAC8 PE=3 SV=1	S	Function unknown	placenta-specific gene 8 protein [Sus scrofa]	cellular component: cell (GO:0005623);; cellular component: organelle (GO:0043226);; cellular component: cell part (GO:0044464);; biological process: cellular process (GO:0009987);; biological process: single-organism process (GO:0044699);; biological process: immune system process (GO:0002376);; biological process: response to stimulus (GO:0050896);; molecular function: binding (GO:0005488);; ce…
ENSSSCG00000009281	ENSSSCG00000009281	20.2879	1250	22.3426	1309	22.7124	1406	18.2225	1115	14.9663	989	12.2507	841	13.9973	928	11.5568	697	2.71091e-08	0.605975	up	--	--	Cellular Component: sarcoglycan complex (GO:0016012);; Cellular Component: integral component of membrane (GO:0016021);;	K12564|7.3e-221|ssc:100623668|K12564 gamma-sarcoglycan | (RefSeq) SGCG; gamma-sarcoglycan isoform X3	Hypertrophic cardiomyopathy (ko05410);; Arrhythmogenic right ventricular cardiomyopathy (ko05412);; Dilated cardiomyopathy (ko05414);; Viral myocarditis (ko05416)	[Z]	Cytoskeleton	Sarcoglycan complex subunit protein	Gamma-sarcoglycan OS=Canis lupus familiaris OX=9615 GN=SGCG PE=3 SV=1	Z	Cytoskeleton	gamma-sarcoglycan isoform X1 [Sus scrofa]	cellular component: cell (GO:0005623);; cellular component: membrane (GO:0016020);; cellular component: macromolecular complex (GO:0032991);; cellular component: membrane part (GO:0044425);; cellular component: cell part (GO:0044464)
ENSSSCG00000009330	ALOX5AP	7.03214	266	8.64896	307	6.6191	247	7.06926	261	2.80568	111	4.27678	175	3.09179	123	3.85871	140	2.60885e-07	1.02059	up	--	--	Biological Process: leukotriene production involved in inflammatory response (GO:0002540);; Molecular Function: glutathione transferase activity (GO:0004364);; Molecular Function: leukotriene-C4 synthase activity (GO:0004464);; Molecular Function: glutathione peroxidase activity (GO:0004602);; Cellular Component: nuclear envelope (GO:0005635);; Cellular Component: endoplasmic reticulum (GO:000578…	K20735|2.3e-85|ssc:397392|K20735 arachidonate 5-lipoxygenase-activating protein | (RefSeq) ALOX5AP; arachidonate 5-lipoxygenase-activating protein precursor	Fc epsilon RI signaling pathway (ko04664)	--	--	MAPEG family	Arachidonate 5-lipoxygenase-activating protein (Fragment) OS=Sus scrofa OX=9823 GN=ALOX5AP PE=2 SV=1	S	Function unknown	arachidonate 5-lipoxygenase-activating protein precursor [Sus scrofa]	biological process: multicellular organismal process (GO:0032501);; biological process: single-organism process (GO:0044699);; biological process: response to stimulus (GO:0050896);; molecular function: catalytic activity (GO:0003824);; molecular function: antioxidant activity (GO:0016209);; biological process: metabolic process (GO:0008152);; biological process: cellular process (GO:0009987);; b…
ENSSSCG00000009378	CKAP2	3.02475	374	2.27508	265	2.91646	356	2.35182	285	6.01022	778	3.64901	488	3.90812	508	2.25922	267	0.00691086	-0.61389	down	--	--	Biological Process: mitotic cytokinesis (GO:0000281);; Cellular Component: centrosome (GO:0005813);; Cellular Component: cytosol (GO:0005829);; Cellular Component: cytoplasmic microtubule (GO:0005881);; Biological Process: negative regulation of microtubule depolymerization (GO:0007026);; Biological Process: positive regulation of transcription from RNA polymerase II promoter (GO:0045944);;	K16769|0.0e+00|ssc:100515274|K16769 cytoskeleton-associated protein 2 | (RefSeq) CKAP2; cytoskeleton-associated protein 2 isoform X1	--	--	--	Cytoskeleton-associated protein 2 C-terminus	Cytoskeleton-associated protein 2 OS=Pongo abelii OX=9601 GN=CKAP2 PE=2 SV=1	S	Function unknown	cytoskeleton-associated protein 2 isoform X1 [Sus scrofa]	biological process: cellular process (GO:0009987);; biological process: single-organism process (GO:0044699);; cellular component: cell (GO:0005623);; cellular component: organelle (GO:0043226);; cellular component: organelle part (GO:0044422);; cellular component: cell part (GO:0044464);; cellular component: supramolecular complex (GO:0099080);; biological process: biological regulation (GO:0065…
ENSSSCG00000009412	LCP1	4.63333	1405	5.04358	1439	4.44279	1344	4.3877	1285	1.6564	518	1.74716	598	2.17613	693	2.42001	687	3.73753e-22	1.17038	up	--	--	Molecular Function: calcium ion binding (GO:0005509);; Cellular Component: cytoplasm (GO:0005737);; Cellular Component: actin filament (GO:0005884);; Cellular Component: actin filament bundle (GO:0032432);; Molecular Function: actin filament binding (GO:0051015);; Biological Process: actin filament bundle assembly (GO:0051017);; Biological Process: actin filament network formation (GO:0051639);;	K17276|0.0e+00|vvp:112933911|K17276 plastin-2 | (RefSeq) LCP1; plastin-2 isoform X1	--	[Z]	Cytoskeleton	Calponin homology (CH) domain	Plastin-3 OS=Bos taurus OX=9913 GN=PLS3 PE=2 SV=1	Z	Cytoskeleton	plastin-2 isoform X1 [Vulpes vulpes]	molecular function: binding (GO:0005488);; cellular component: cell (GO:0005623);; cellular component: cell part (GO:0044464);; cellular component: organelle (GO:0043226);; cellular component: organelle part (GO:0044422);; cellular component: supramolecular complex (GO:0099080);; biological process: cellular process (GO:0009987);; biological process: single-organism process (GO:0044699);; biologi…
ENSSSCG00000009422	TSC22D1	104.76	9526	106.882	8885	101.849	9265	98.9703	8870	58.8001	6092	54.7927	6006	60.5031	6334	53.1949	5185	5.9494e-24	0.67648	up	--	--	Molecular Function: transcription regulatory region sequence-specific DNA binding (GO:0000976);; Molecular Function: RNA polymerase II regulatory region sequence-specific DNA binding (GO:0000977);; Molecular Function: RNA polymerase II core promoter proximal region sequence-specific DNA binding (GO:0000978);; Molecular Function: RNA polymerase II transcription factor activity, sequence-specific D…	--	--	[K]	Transcription	--	TSC22 domain family protein 1 OS=Pongo abelii OX=9601 GN=TSC22D1 PE=2 SV=2	K	Transcription	TSC22 domain family protein 1 isoform X2 [Sus scrofa]	molecular function: binding (GO:0005488);; molecular function: nucleic acid binding transcription factor activity (GO:0001071);; biological process: biological regulation (GO:0065007);; biological process: metabolic process (GO:0008152);; biological process: cellular process (GO:0009987);; cellular component: cell (GO:0005623);; cellular component: cell part (GO:0044464);; cellular component: org…
ENSSSCG00000009426	ENSSSCG00000009426	0.967648	97	1.22327	115	1.19389	118	0.863818	85	0.493219	52	0.562947	61	0.564142	59	0.774733	74	0.00104819	0.790764	up	--	--	--	K11168|1.1e-49|cmk:103177522|K11168 dehydrogenase/reductase SDR family member 12 [EC:1.1.-.-] | (RefSeq) ccdc122; coiled-coil domain containing 122	--	--	--	--	--	S	Function unknown	coiled-coil domain-containing protein 122 isoform X1 [Sus scrofa]	--
ENSSSCG00000009448	DIAPH3	1.10823	302	0.874718	222	0.883019	237	0.651449	176	2.35473	674	1.55811	456	1.79317	510	1.33767	355	6.62092e-08	-1.04159	down	--	--	Molecular Function: actin binding (GO:0003779);; Molecular Function: Rho GTPase binding (GO:0017048);; Biological Process: actin cytoskeleton organization (GO:0030036);;	K05745|0.0e+00|ssc:100737986|K05745 diaphanous 3 | (RefSeq) DIAPH3; protein diaphanous homolog 3 isoform X1	Regulation of actin cytoskeleton (ko04810)	[TZ]	Signal transduction mechanisms;; Cytoskeleton	Formin Homology 2 Domain	--	--	--	protein diaphanous homolog 3 isoform X1 [Sus scrofa]	molecular function: binding (GO:0005488);; biological process: cellular process (GO:0009987);; biological process: single-organism process (GO:0044699);; biological process: cellular component organization or biogenesis (GO:0071840)
ENSSSCG00000009468	KCTD12	1.35628	179	1.5831	197	1.47648	193	1.53891	199	0.887748	123	0.921504	132	1.04184	145	0.788569	100	0.000394092	0.66957	up	--	--	Biological Process: regulation of G-protein coupled receptor protein signaling pathway (GO:0008277);; Cellular Component: presynaptic membrane (GO:0042734);; Molecular Function: identical protein binding (GO:0042802);; Cellular Component: receptor complex (GO:0043235);; Cellular Component: postsynaptic membrane (GO:0045211);; Biological Process: protein homooligomerization (GO:0051260);;	K21918|2.6e-173|ssc:100524761|K21918 BTB/POZ domain-containing protein KCTD8/12/16 | (RefSeq) KCTD12; BTB/POZ domain-containing protein KCTD12	--	[R]	General function prediction only	BTB/POZ domain	Potassium channel regulatory protein OS=Bos taurus OX=9913 GN=KCNRG PE=2 SV=1	S	Function unknown	BTB/POZ domain-containing protein KCTD12 [Sus scrofa]	biological process: biological regulation (GO:0065007);; cellular component: cell (GO:0005623);; cellular component: membrane (GO:0016020);; cellular component: membrane part (GO:0044425);; cellular component: synapse part (GO:0044456);; cellular component: cell part (GO:0044464);; cellular component: synapse (GO:0045202);; molecular function: binding (GO:0005488);; cellular component: macromolec…
ENSSSCG00000009477	EDNRB	2.37499	333	1.63835	323	0.969007	207	2.30317	327	1.59713	154	2.06635	201	1.33132	214	1.13012	163	0.000213919	0.746201	up	--	--	Biological Process: negative regulation of transcription from RNA polymerase II promoter (GO:0000122);; Biological Process: neural crest cell migration (GO:0001755);; Molecular Function: endothelin receptor activity (GO:0004962);; Cellular Component: plasma membrane (GO:0005886);; Biological Process: regulation of pH (GO:0006885);; Biological Process: peripheral nervous system development (GO:000…	K04198|1.5e-256|ssc:414911|K04198 endothelin receptor type B | (RefSeq) EDNRB; endothelin B receptor precursor	Calcium signaling pathway (ko04020);; cGMP-PKG signaling pathway (ko04022);; Neuroactive ligand-receptor interaction (ko04080);; Melanogenesis (ko04916);; Relaxin signaling pathway (ko04926);; Pathways in cancer (ko05200)	[R]	General function prediction only	7 transmembrane receptor (rhodopsin family)	Endothelin receptor type B OS=Sus scrofa OX=9823 GN=EDNRB PE=2 SV=1	T	Signal transduction mechanisms	endothelin receptor type B precursor [Sus scrofa]	biological process: biological regulation (GO:0065007);; biological process: cellular process (GO:0009987);; biological process: locomotion (GO:0040011);; biological process: single-organism process (GO:0044699);; biological process: localization (GO:0051179);; molecular function: signal transducer activity (GO:0004871);; molecular function: molecular transducer activity (GO:0060089);; biological…
ENSSSCG00000009482	SPRY2	7.93126	831	6.48437	639	7.15245	740	5.91369	606	3.70831	407	3.35608	380	3.39354	374	3.84971	384	7.57635e-12	0.905103	up	--	--	Cellular Component: cytosol (GO:0005829);; Cellular Component: membrane (GO:0016020);; Biological Process: negative regulation of fibroblast growth factor receptor signaling pathway (GO:0040037);; Biological Process: regulation of cell proliferation (GO:0042127);; Biological Process: negative regulation of MAP kinase activity (GO:0043407);; Biological Process: regulation of cell differentiation (…	K17383|1.8e-179|ssc:100157266|K17383 protein sprouty homolog 2 | (RefSeq) SPRY2; protein sprouty homolog 2	MicroRNAs in cancer (ko05206)	--	--	Sprouty protein (Spry)	Protein sprouty homolog 2 OS=Chlorocebus aethiops OX=9534 GN=SPRY2 PE=2 SV=1	T	Signal transduction mechanisms	protein sprouty homolog 2 [Sus scrofa]	cellular component: cell (GO:0005623);; cellular component: cell part (GO:0044464);; cellular component: membrane (GO:0016020);; biological process: biological regulation (GO:0065007);; biological process: developmental process (GO:0032502)
ENSSSCG00000009486	SLITRK6	7.00308	1339	7.65572	1359	7.95266	1381	6.97613	1330	3.52845	689	3.40103	690	4.43459	856	4.44033	770	1.87338e-16	0.889308	up	--	--	Biological Process: startle response (GO:0001964);; Biological Process: lens development in camera-type eye (GO:0002088);; Biological Process: auditory receptor cell morphogenesis (GO:0002093);; Cellular Component: integral component of plasma membrane (GO:0005887);; Biological Process: axonogenesis (GO:0007409);; Biological Process: synapse assembly (GO:0007416);; Biological Process: visual perc…	K06263|5.2e-06|cjc:100398063|K06263 platelet glycoprotein IX | (RefSeq) GP9; glycoprotein IX platelet	ECM-receptor interaction (ko04512);; Platelet activation (ko04611);; Hematopoietic cell lineage (ko04640)	--	--	Leucine rich repeat	SLIT and NTRK-like protein 1 OS=Pongo abelii OX=9601 GN=SLITRK1 PE=2 SV=1	T	Signal transduction mechanisms	SLIT and NTRK-like protein 6 isoform X1 [Sus scrofa]	biological process: multicellular organismal process (GO:0032501);; biological process: response to stimulus (GO:0050896);; biological process: developmental process (GO:0032502);; biological process: single-organism process (GO:0044699);; biological process: cellular process (GO:0009987);; biological process: cellular component organization or biogenesis (GO:0071840);; cellular component: cell (…
ENSSSCG00000009530	ENSSSCG00000009530	0.061057	53	0.069812	57	0.074092	63	0.096369	81	0.031345	29	0.020529	20	0.025425	23	0.038102	32	6.46267e-06	1.32608	up	--	--	Cellular Component: integral component of membrane (GO:0016021);;	--	--	--	--	Coiled-coil domain-containing protein 168	--	S	Function unknown	coiled-coil domain-containing protein 168 [Sus scrofa]	cellular component: membrane (GO:0016020);; cellular component: membrane part (GO:0044425)
ENSSSCG00000009601	SLC18A1	0.352176	51	0.348472	47	0.414147	59	0.35424	50	0.100797	16	0.060358	10	0.09328	14	0.076469	11	2.87676e-11	2.05665	up	[G]	Carbohydrate transport and metabolism	Cellular Component: integral component of membrane (GO:0016021);; Molecular Function: xenobiotic transporter activity (GO:0042910);;	K08155|1.0e-296|ssc:100154435|K08155 MFS transporter, DHA1 family, solute carrier family 18 (vesicular amine transporter), member 1/2 | (RefSeq) SLC18A1; chromaffin granule amine transporter isoform X1	Synaptic vesicle cycle (ko04721);; Serotonergic synapse (ko04726);; Dopaminergic synapse (ko04728);; Parkinson disease (ko05012);; Cocaine addiction (ko05030);; Amphetamine addiction (ko05031);; Alcoholism (ko05034)	[U]	Intracellular trafficking, secretion, and vesicular transport	Major Facilitator Superfamily	Synaptic vesicular amine transporter OS=Bos taurus OX=9913 GN=SLC18A2 PE=1 SV=1	U	Intracellular trafficking, secretion, and vesicular transport	chromaffin granule amine transporter isoform X1 [Sus scrofa]	cellular component: membrane (GO:0016020);; cellular component: membrane part (GO:0044425);; molecular function: transporter activity (GO:0005215);; biological process: localization (GO:0051179)
ENSSSCG00000009612	DOK2	1.82719	104	3.36017	179	2.78805	156	2.63566	146	0.85318	51	1.13553	70	0.695903	42	0.493331	27	1.71862e-09	1.68371	up	--	--	Molecular Function: transmembrane receptor protein tyrosine kinase adaptor activity (GO:0005068);; Biological Process: Ras protein signal transduction (GO:0007265);;	K14752|1.2e-45|sasa:106578075|K14752 docking protein 1 | (RefSeq) uncharacterized LOC106578075	--	[T]	Signal transduction mechanisms	PTB domain (IRS-1 type)	Docking protein 2 OS=Bos taurus OX=9913 GN=DOK2 PE=2 SV=1	T	Signal transduction mechanisms	docking protein 2 [Sus scrofa]	molecular function: signal transducer activity (GO:0004871);; molecular function: binding (GO:0005488);; biological process: cellular process (GO:0009987);; biological process: signaling (GO:0023052);; biological process: single-organism process (GO:0044699);; biological process: response to stimulus (GO:0050896);; biological process: biological regulation (GO:0065007)
ENSSSCG00000009613	DMTN	0.757966	117	0.83194	125	1.37743	165	1.32473	157	0.643278	81	0.315472	56	0.350097	56	0.536829	80	7.97345e-06	1.08688	up	--	--	Molecular Function: actin binding (GO:0003779);; Biological Process: cytoskeleton organization (GO:0007010);;	K07520|8.2e-65|mcal:110285910|K07520 actin-binding LIM protein | (RefSeq) Ablim1; actin-binding LIM protein 1 isoform X1	Axon guidance (ko04360)	[TZ]	Signal transduction mechanisms;; Cytoskeleton	Putative adherens-junction anchoring region of AbLIM	Dematin OS=Bos taurus OX=9913 GN=DMTN PE=2 SV=1	Z	Cytoskeleton	dematin isoform X3 [Sus scrofa]	molecular function: binding (GO:0005488);; biological process: cellular process (GO:0009987);; biological process: cellular component organization or biogenesis (GO:0071840)
ENSSSCG00000009616	HR	3.58944	778	3.94354	803	3.28797	704	3.69568	783	2.30018	522	2.24592	527	1.68695	384	2.15417	446	7.538e-09	0.753336	up	--	--	Cellular Component: chromatin (GO:0000785);; Molecular Function: transcription regulatory region sequence-specific DNA binding (GO:0000976);; Molecular Function: transcription corepressor activity (GO:0003714);; Cellular Component: nucleus (GO:0005634);; Biological Process: regulation of transcription, DNA-templated (GO:0006355);; Cellular Component: nuclear body (GO:0016604);; Molecular Function…	K00478|0.0e+00|ssc:397617|K00478 [histone H3]-dimethyl-L-lysine9 demethylase [EC:1.14.11.65] | (RefSeq) HR; lysine-specific demethylase hairless	--	[K]	Transcription	--	--	K	Transcription	lysine-specific demethylase hairless [Sus scrofa]	cellular component: cell (GO:0005623);; cellular component: organelle (GO:0043226);; cellular component: organelle part (GO:0044422);; cellular component: cell part (GO:0044464);; molecular function: binding (GO:0005488);; molecular function: transcription factor activity, protein binding (GO:0000988);; biological process: biological regulation (GO:0065007);; cellular component: membrane-enclosed…
ENSSSCG00000009631	PEBP4	6.36441	261	7.19535	280	9.44311	385	5.75037	233	3.85329	167	2.50887	113	2.52153	110	2.87688	114	1.03035e-08	1.24809	up	--	--	--	K06910|2.3e-32|lcf:108878493|K06910 phosphatidylethanolamine-binding protein | (RefSeq) pebp4; phosphatidylethanolamine-binding protein 4 isoform X1	--	[R]	General function prediction only	Phosphatidylethanolamine-binding protein	--	S	Function unknown	phosphatidylethanolamine-binding protein 4 isoform X1 [Sus scrofa]	--
ENSSSCG00000009644	ADAM28	2.036	236	3.07469	336	1.74668	202	2.34559	271	0.603148	73	0.685808	94	0.617453	128	0.610663	92	4.32254e-10	1.4784	up	--	--	Molecular Function: metalloendopeptidase activity (GO:0004222);;	K08614|0.0e+00|ssc:100152711|K08614 disintegrin and metalloproteinase domain-containing protein 28 [EC:3.4.24.-] | (RefSeq) ADAM28; disintegrin and metalloproteinase domain-containing protein 28 isoform X1	--	[O]	Posttranslational modification, protein turnover, chaperones	Reprolysin (M12B) family zinc metalloprotease	Disintegrin and metalloproteinase domain-containing protein 28 OS=Macaca fascicularis OX=9541 GN=ADAM28 PE=2 SV=1	O	Posttranslational modification, protein turnover, chaperones	disintegrin and metalloproteinase domain-containing protein 28 isoform X2 [Sus scrofa]	molecular function: catalytic activity (GO:0003824);; biological process: metabolic process (GO:0008152)
ENSSSCG00000009661	ADRA1A	0.824618	173	1.20667	216	1.14525	210	0.86185	180	1.34912	307	1.27452	288	1.63671	367	1.72625	351	9.42015e-05	-0.711734	down	--	--	Biological Process: negative regulation of heart rate involved in baroreceptor response to increased systemic arterial blood pressure (GO:0001985);; Biological Process: norepinephrine-epinephrine vasoconstriction involved in regulation of systemic arterial blood pressure (GO:0001994);; Biological Process: positive regulation of heart rate by epinephrine-norepinephrine (GO:0001996);; Biological Pr…	K04135|5.5e-273|ssc:100144471|K04135 adrenergic receptor alpha-1A | (RefSeq) ADRA1A; alpha-1A adrenergic receptor	Calcium signaling pathway (ko04020);; cGMP-PKG signaling pathway (ko04022);; Neuroactive ligand-receptor interaction (ko04080);; AMPK signaling pathway (ko04152);; Adrenergic signaling in cardiomyocytes (ko04261);; Vascular smooth muscle contraction (ko04270);; Salivary secretion (ko04970)	[R]	General function prediction only	7 transmembrane receptor (rhodopsin family)	Alpha-1A adrenergic receptor OS=Bos taurus OX=9913 GN=ADRA1A PE=2 SV=1	T	Signal transduction mechanisms	alpha-1A adrenergic receptor [Sus scrofa]	biological process: biological regulation (GO:0065007);; biological process: multicellular organismal process (GO:0032501);; molecular function: signal transducer activity (GO:0004871);; molecular function: molecular transducer activity (GO:0060089);; biological process: cellular process (GO:0009987);; biological process: signaling (GO:0023052);; biological process: single-organism process (GO:00…
ENSSSCG00000009671	PBK	4.03498	351	2.37675	194	2.53628	218	2.51569	214	8.54288	777	5.86963	551	5.00765	457	2.97885	247	0.000107137	-0.999454	down	[E]	Amino acid transport and metabolism	Biological Process: mitotic cell cycle (GO:0000278);; Molecular Function: protein serine/threonine kinase activity (GO:0004674);; Molecular Function: ATP binding (GO:0005524);; Cellular Component: nucleus (GO:0005634);; Biological Process: negative regulation of proteasomal ubiquitin-dependent protein catabolic process (GO:0032435);; Biological Process: negative regulation of stress-activated MAP…	K08865|3.9e-185|ssc:100141310|K08865 PDZ-binding kinase [EC:2.7.12.2] | (RefSeq) PBK; lymphokine-activated killer T-cell-originated protein kinase	--	[T]	Signal transduction mechanisms	Protein kinase domain	Dual specificity mitogen-activated protein kinase kinase 1 OS=Oryctolagus cuniculus OX=9986 GN=MAP2K1 PE=1 SV=2	T	Signal transduction mechanisms	lymphokine-activated killer T-cell-originated protein kinase isoform X1 [Sus scrofa]	biological process: cellular process (GO:0009987);; biological process: single-organism process (GO:0044699);; molecular function: catalytic activity (GO:0003824);; biological process: metabolic process (GO:0008152);; molecular function: binding (GO:0005488);; cellular component: cell (GO:0005623);; cellular component: organelle (GO:0043226);; cellular component: cell part (GO:0044464);; biologic…
ENSSSCG00000009672	ENSSSCG00000009672	1.16198	160	1.34449	173	1.37346	186	1.17334	157	0.548653	79	0.360824	54	0.360535	52	0.96452	127	0.000106302	1.13591	up	--	--	Molecular Function: scavenger receptor activity (GO:0005044);; Cellular Component: integral component of membrane (GO:0016021);;	K06558|2.5e-36|xla:108705968|K06558 macrophage scavenger receptor 1 | (RefSeq) msr1.S; macrophage scavenger receptor 1 S homeolog	Phagosome (ko04145)	--	--	Scavenger receptor cysteine-rich domain	Scavenger receptor class A member 5 OS=Bos taurus OX=9913 GN=SCARA5 PE=2 SV=1	W	Extracellular structures	scavenger receptor class A member 5 [Pipistrellus kuhlii]	molecular function: molecular transducer activity (GO:0060089);; biological process: localization (GO:0051179);; cellular component: membrane (GO:0016020);; cellular component: membrane part (GO:0044425)
ENSSSCG00000009720	DDX60	0.34737	96	0.330536	85	0.323349	86	0.242771	66	0.800122	220	0.466148	139	0.686416	196	0.582613	148	4.00484e-06	-1.03179	down	[L]	Replication, recombination and repair	Molecular Function: double-stranded DNA binding (GO:0003690);; Molecular Function: double-stranded RNA binding (GO:0003725);; Molecular Function: single-stranded RNA binding (GO:0003727);; Molecular Function: ATP binding (GO:0005524);; Cellular Component: cytosol (GO:0005829);; Cellular Component: intermediate filament cytoskeleton (GO:0045111);; Biological Process: defense response to virus (GO:…	K20103|0.0e+00|ssc:100158037|K20103 ATP-dependent RNA helicase DDX60 [EC:3.6.4.13] | (RefSeq) DDX60; probable ATP-dependent RNA helicase DDX60 isoform X1	--	[R]	General function prediction only	DEAD/DEAH box helicase	--	A	RNA processing and modification	probable ATP-dependent RNA helicase DDX60 isoform X1 [Sus scrofa]	molecular function: binding (GO:0005488);; cellular component: cell (GO:0005623);; cellular component: cell part (GO:0044464);; cellular component: organelle (GO:0043226);; biological process: immune system process (GO:0002376);; biological process: response to stimulus (GO:0050896);; biological process: multi-organism process (GO:0051704);; biological process: biological regulation (GO:0065007)
ENSSSCG00000009755	AACS	28.3264	4735	24.6698	4655	35.0714	5504	22.4323	4397	13.507	2185	11.035	2035	11.9113	2107	15.4611	2321	6.72208e-37	1.19689	up	[I]	Lipid transport and metabolism	Molecular Function: ATP binding (GO:0005524);; Cellular Component: cytosol (GO:0005829);; Biological Process: fatty acid metabolic process (GO:0006631);; Molecular Function: acetoacetate-CoA ligase activity (GO:0030729);;	K01907|1.1e-164|ssc:100156545|K01907 acetoacetyl-CoA synthetase [EC:6.2.1.16] | (RefSeq) AACS; acetoacetyl-CoA synthetase	Valine, leucine and isoleucine degradation (ko00280);; Butanoate metabolism (ko00650)	[I]	Lipid transport and metabolism	--	Acetoacetyl-CoA synthetase OS=Macaca fascicularis OX=9541 GN=AACS PE=2 SV=1	I	Lipid transport and metabolism	acetoacetyl-CoA synthetase [Sus scrofa]	molecular function: binding (GO:0005488);; cellular component: cell (GO:0005623);; cellular component: cell part (GO:0044464);; biological process: metabolic process (GO:0008152);; biological process: cellular process (GO:0009987);; biological process: single-organism process (GO:0044699);; molecular function: catalytic activity (GO:0003824)
ENSSSCG00000009839	CIT	0.885446	345	0.706264	252	1.23651	481	0.55677	216	2.1561	856	1.43986	591	1.51315	605	0.868806	314	0.00153872	-0.811587	down	[T]	Signal transduction mechanisms	Biological Process: mitotic cytokinesis (GO:0000281);; Molecular Function: protein serine/threonine kinase activity (GO:0004674);; Molecular Function: ATP binding (GO:0005524);; Cellular Component: cytoplasm (GO:0005737);; Biological Process: intracellular signal transduction (GO:0035556);; Molecular Function: metal ion binding (GO:0046872);;	K16308|0.0e+00|ssc:100153706|K16308 citron Rho-interacting kinase [EC:2.7.11.1] | (RefSeq) CIT; citron Rho-interacting kinase isoform X1	--	[T]	Signal transduction mechanisms	CNH domain	Rho-associated protein kinase 1 OS=Oryctolagus cuniculus OX=9986 GN=ROCK1 PE=1 SV=1	T	Signal transduction mechanisms	citron Rho-interacting kinase isoform X2 [Sus scrofa]	biological process: cellular process (GO:0009987);; biological process: single-organism process (GO:0044699);; molecular function: catalytic activity (GO:0003824);; biological process: metabolic process (GO:0008152);; molecular function: binding (GO:0005488);; cellular component: cell (GO:0005623);; cellular component: cell part (GO:0044464);; biological process: signaling (GO:0023052);; biologic…
ENSSSCG00000009883	RPH3A	0.655281	115	0.467308	94	0.884769	169	0.434592	91	0.320147	61	0.276043	64	0.25888	58	0.421353	86	0.00180683	0.833237	up	--	--	Biological Process: intracellular protein transport (GO:0006886);; Cellular Component: membrane (GO:0016020);; Molecular Function: Rab GTPase binding (GO:0017137);; Molecular Function: metal ion binding (GO:0046872);;	K19938|0.0e+00|ssc:100736858|K19938 rabphilin-3A | (RefSeq) RPH3A; rabphilin-3A isoform X3	--	[U]	Intracellular trafficking, secretion, and vesicular transport	C2 domain	Rabphilin-3A OS=Bos taurus OX=9913 GN=RPH3A PE=1 SV=1	U	Intracellular trafficking, secretion, and vesicular transport	rabphilin-3A isoform X1 [Sus scrofa]	biological process: localization (GO:0051179);; cellular component: membrane (GO:0016020);; molecular function: binding (GO:0005488)
ENSSSCG00000009956	GRK3	7.72144	2030	6.80408	1665	7.50155	1932	7.22574	1838	4.77321	1322	3.88565	1096	4.48844	1227	5.23529	1303	2.60168e-10	0.631995	up	[T]	Signal transduction mechanisms	Molecular Function: G-protein coupled receptor kinase activity (GO:0004703);; Molecular Function: ATP binding (GO:0005524);; Biological Process: signal transduction (GO:0007165);;	K00910|0.0e+00|ssc:100156449|K00910 beta-adrenergic-receptor kinase [EC:2.7.11.15] | (RefSeq) GRK3; beta-adrenergic receptor kinase 2 isoform X1	Chemokine signaling pathway (ko04062);; Endocytosis (ko04144);; Hedgehog signaling pathway (ko04340);; Glutamatergic synapse (ko04724);; Olfactory transduction (ko04740);; Morphine addiction (ko05032)	[T]	Signal transduction mechanisms	Protein kinase domain	Beta-adrenergic receptor kinase 2 OS=Bos taurus OX=9913 GN=GRK3 PE=2 SV=1	T	Signal transduction mechanisms	beta-adrenergic receptor kinase 2 isoform X1 [Sus scrofa]	molecular function: catalytic activity (GO:0003824);; biological process: metabolic process (GO:0008152);; biological process: cellular process (GO:0009987);; molecular function: binding (GO:0005488);; biological process: biological regulation (GO:0065007)
ENSSSCG00000009975	EMID1	2.15596	235	2.29711	206	1.85614	184	2.03677	192	1.0588	112	1.20825	125	1.38876	143	0.510297	74	1.93151e-05	0.898671	up	--	--	Molecular Function: protein binding (GO:0005515);; Cellular Component: cellular_component (GO:0005575);; Cellular Component: extracellular region (GO:0005576);; Cellular Component: intracellular (GO:0005622);; Cellular Component: cell (GO:0005623);; Cellular Component: cytoplasm (GO:0005737);; Cellular Component: endoplasmic reticulum (GO:0005783);; Cellular Component: Golgi apparatus (GO:0005794…	K24358|8.7e-29|pon:100441322|K24358 collagen type XXVI alpha (EMI domain-containing protein 2) | (RefSeq) COL26A1; collagen alpha-1(XXVI) chain isoform X1	Protein digestion and absorption (ko04974)	--	--	Collagen triple helix repeat (20 copies)	--	W	Extracellular structures	EMI domain-containing protein 1 isoform X4 [Sus scrofa]	molecular function: binding (GO:0005488);; cellular component: extracellular region (GO:0005576);; cellular component: cell (GO:0005623);; cellular component: cell part (GO:0044464);; cellular component: organelle (GO:0043226);; cellular component: extracellular region part (GO:0044421)
ENSSSCG00000010055	GGT5	13.3984	1974	15.3056	1830	9.34618	1940	13.6331	1928	7.97184	1237	7.7796	1220	7.61981	1108	5.95905	956	3.45589e-21	0.811546	up	[E]	Amino acid transport and metabolism	Biological Process: glutathione catabolic process (GO:0006751);; Molecular Function: glutathione hydrolase activity (GO:0036374);;	K18592|9.4e-265|ssc:100157523|K18592 gamma-glutamyltranspeptidase / glutathione hydrolase / leukotriene-C4 hydrolase [EC:2.3.2.2 3.4.19.13 3.4.19.14] | (RefSeq) GGT5; gamma-glutamyltransferase 5 isoform X3	Taurine and hypotaurine metabolism (ko00430);; Glutathione metabolism (ko00480);; Arachidonic acid metabolism (ko00590)	[E]	Amino acid transport and metabolism	Gamma-glutamyltranspeptidase	Glutathione hydrolase 1 proenzyme OS=Sus scrofa OX=9823 GN=GGT1 PE=2 SV=1	E	Amino acid transport and metabolism	gamma-glutamyltransferase 5 isoform X2 [Sus scrofa]	biological process: metabolic process (GO:0008152);; biological process: cellular process (GO:0009987);; molecular function: catalytic activity (GO:0003824)
ENSSSCG00000010056	ENSSSCG00000010056	3.34905	573	2.85791	490	2.26649	417	2.86927	392	2.05101	374	1.11363	277	1.6625	317	1.43416	259	4.52594e-05	0.65349	up	[E]	Amino acid transport and metabolism	Biological Process: glutathione catabolic process (GO:0006751);; Molecular Function: glutathione hydrolase activity (GO:0036374);;	K18592|2.3e-123|ssc:397095|K18592 gamma-glutamyltranspeptidase / glutathione hydrolase / leukotriene-C4 hydrolase [EC:2.3.2.2 3.4.19.13 3.4.19.14] | (RefSeq) GGT1; gamma-glutamyltranspeptidase 1	Taurine and hypotaurine metabolism (ko00430);; Glutathione metabolism (ko00480);; Arachidonic acid metabolism (ko00590)	[E]	Amino acid transport and metabolism	Gamma-glutamyltranspeptidase	Glutathione hydrolase 1 proenzyme OS=Sus scrofa OX=9823 GN=GGT1 PE=2 SV=1	E	Amino acid transport and metabolism	gamma-glutamyltranspeptidase 1 isoform X1 [Sus scrofa]	biological process: metabolic process (GO:0008152);; biological process: cellular process (GO:0009987);; molecular function: catalytic activity (GO:0003824)
ENSSSCG00000010144	ACTN2	0.411027	112	0.538336	140	0.675413	167	0.495264	117	0.339144	83	0.203054	64	0.476334	111	0.428305	96	0.00928996	0.638607	up	--	--	Molecular Function: calcium ion binding (GO:0005509);;	K21073|0.0e+00|ssc:100157406|K21073 actinin alpha 2/3 | (RefSeq) ACTN2; alpha-actinin-2	Arrhythmogenic right ventricular cardiomyopathy (ko05412)	[Z]	Cytoskeleton	Spectrin repeat	Alpha-actinin-2 OS=Bos taurus OX=9913 GN=ACTN2 PE=2 SV=1	Z	Cytoskeleton	alpha-actinin-2 [Sus scrofa]	molecular function: binding (GO:0005488)
ENSSSCG00000010184	AGT	97.6327	12747	90.4672	10525	94.3709	12401	84.3731	10583	46.4994	6382	49.0691	7007	51.7334	7101	59.7296	7447	1.52157e-17	0.764411	up	[O]	Posttranslational modification, protein turnover, chaperones	Biological Process: activation of MAPK activity (GO:0000187);; Biological Process: kidney development (GO:0001822);; Biological Process: renal system process (GO:0003014);; Biological Process: regulation of systemic arterial blood pressure by renin-angiotensin (GO:0003081);; Molecular Function: serine-type endopeptidase inhibitor activity (GO:0004867);; Cellular Component: extracellular space (GO…	K09821|6.6e-266|ssc:100157073|K09821 angiotensinogen | (RefSeq) AGT; angiotensinogen	Phospholipase D signaling pathway (ko04072);; Neuroactive ligand-receptor interaction (ko04080);; Adrenergic signaling in cardiomyocytes (ko04261);; Vascular smooth muscle contraction (ko04270);; Renin-angiotensin system (ko04614);; Renin secretion (ko04924);; Aldosterone synthesis and secretion (ko04925);; Cortisol synthesis and secretion (ko04927);; Insulin resistance (ko04931);; AGE-RAGE signa…	[V]	Defense mechanisms	Serpin (serine protease inhibitor)	Angiotensinogen OS=Bos taurus OX=9913 GN=AGT PE=1 SV=2	V	Defense mechanisms	angiotensinogen [Sus scrofa]	biological process: biological regulation (GO:0065007);; biological process: multicellular organismal process (GO:0032501);; biological process: developmental process (GO:0032502);; biological process: single-organism process (GO:0044699);; molecular function: molecular function regulator (GO:0098772);; cellular component: extracellular region (GO:0005576);; cellular component: extracellular regi…
ENSSSCG00000010190	ENSSSCG00000010190	7.24963	899	7.86304	910	8.87078	996	7.69254	900	9.77737	1260	16.527	2069	15.1949	1902	22.4713	2545	1.85389e-09	-1.0398	down	[Z]	Cytoskeleton	Molecular Function: ATP binding (GO:0005524);; Cellular Component: cytoplasm (GO:0005737);; Cellular Component: cytoskeleton (GO:0005856);;	K12313|2.4e-196|sdu:111219689|K12313 actin, aortic smooth muscle | (RefSeq) actin, alpha skeletal muscle B-like	Vascular smooth muscle contraction (ko04270);; Apelin signaling pathway (ko04371)	[Z]	Cytoskeleton	Actin	Actin, alpha skeletal muscle OS=Bos taurus OX=9913 GN=ACTA1 PE=1 SV=1	Z	Cytoskeleton	actin; alpha skeletal muscle [Camelus dromedarius]	molecular function: binding (GO:0005488);; cellular component: cell (GO:0005623);; cellular component: cell part (GO:0044464);; cellular component: organelle (GO:0043226)
ENSSSCG00000010214	CDK1	2.42267	298	1.83279	221	1.48019	180	1.51637	192	4.32841	575	3.39582	454	2.52534	343	1.79385	221	0.00098015	-0.781853	down	[R]	General function prediction only	Biological Process: G2/M transition of mitotic cell cycle (GO:0000086);; Biological Process: meiotic spindle organization (GO:0000212);; Molecular Function: chromatin binding (GO:0003682);; Molecular Function: cyclin-dependent protein serine/threonine kinase activity (GO:0004693);; Molecular Function: ATP binding (GO:0005524);; Cellular Component: nucleus (GO:0005634);; Cellular Component: nucleo…	K02087|6.6e-171|ssc:100155762|K02087 cyclin-dependent kinase 1 [EC:2.7.11.22 2.7.11.23] | (RefSeq) CDK1; cyclin-dependent kinase 1	Cell cycle (ko04110);; Oocyte meiosis (ko04114);; p53 signaling pathway (ko04115);; Cellular senescence (ko04218);; Gap junction (ko04540);; Progesterone-mediated oocyte maturation (ko04914);; Human immunodeficiency virus 1 infection (ko05170);; Viral carcinogenesis (ko05203)	[R]	General function prediction only	Protein kinase domain	Cyclin-dependent kinase 1 OS=Pongo abelii OX=9601 GN=CDK1 PE=2 SV=1	T	Signal transduction mechanisms	cyclin-dependent kinase 1 [Sus scrofa]	biological process: cellular process (GO:0009987);; biological process: single-organism process (GO:0044699);; biological process: reproduction (GO:0000003);; biological process: reproductive process (GO:0022414);; biological process: cellular component organization or biogenesis (GO:0071840);; molecular function: binding (GO:0005488);; molecular function: catalytic activity (GO:0003824);; biolog…
ENSSSCG00000010277	SLC29A3	1.57385	267	1.84846	176	1.96579	189	0.368723	86	0.343948	54	0.10726	50	1.62652	180	0.121448	50	0.00495223	1.1436	up	--	--	Molecular Function: nucleoside transmembrane transporter activity (GO:0005337);; Cellular Component: lysosomal membrane (GO:0005765);; Cellular Component: integral component of membrane (GO:0016021);;	K15014|4.7e-297|ssc:100153166|K15014 solute carrier family 29 (equilibrative nucleoside transporter), member 1/2/3 | (RefSeq) SLC29A3; equilibrative nucleoside transporter 3	Alcoholism (ko05034)	[F]	Nucleotide transport and metabolism	Nucleoside transporter	Equilibrative nucleoside transporter 3 OS=Bos taurus OX=9913 GN=SLC29A3 PE=2 SV=1	F	Nucleotide transport and metabolism	equilibrative nucleoside transporter 3 [Sus scrofa]	molecular function: transporter activity (GO:0005215);; biological process: single-organism process (GO:0044699);; biological process: localization (GO:0051179);; cellular component: cell (GO:0005623);; cellular component: membrane (GO:0016020);; cellular component: organelle (GO:0043226);; cellular component: organelle part (GO:0044422);; cellular component: cell part (GO:0044464);; cellular com…
ENSSSCG00000010381	ARHGAP22	4.38664	535	4.91531	561	4.55734	522	4.0766	485	3.1708	398	2.57069	341	1.92293	249	2.68918	314	2.0673e-06	0.736634	up	--	--	Molecular Function: GTPase activator activity (GO:0005096);; Biological Process: signal transduction (GO:0007165);;	K20642|0.0e+00|ssc:102159729|K20642 Rho GTPase-activating protein 22/24/25 | (RefSeq) ARHGAP22; rho GTPase-activating protein 22 isoform X1	--	--	--	RhoGAP domain	Active breakpoint cluster region-related protein OS=Bos taurus OX=9913 GN=ABR PE=2 SV=1	T	Signal transduction mechanisms	rho GTPase-activating protein 22 isoform X2 [Sus scrofa]	molecular function: molecular function regulator (GO:0098772);; biological process: biological regulation (GO:0065007);; biological process: cellular process (GO:0009987)
ENSSSCG00000010451	IFIT2	2.16544	331	2.05121	294	1.64182	248	1.19818	179	4.7892	765	2.20665	361	3.42408	548	3.24589	473	7.85381e-06	-0.987398	down	--	--	Molecular Function: RNA binding (GO:0003723);; Cellular Component: endoplasmic reticulum (GO:0005783);; Cellular Component: cytosol (GO:0005829);; Biological Process: negative regulation of protein binding (GO:0032091);; Biological Process: cellular response to interferon-alpha (GO:0035457);; Biological Process: positive regulation of apoptotic process (GO:0043065);; Biological Process: defense r…	K14217|8.8e-101|epz:103565697|K14217 interferon-induced protein with tetratricopeptide repeats 1 | (RefSeq) IFIT1B; interferon induced protein with tetratricopeptide repeats 1B	Hepatitis C (ko05160)	[R]	General function prediction only	TPR repeat	Interferon-induced protein with tetratricopeptide repeats 3 OS=Pan troglodytes OX=9598 GN=IFIT3 PE=2 SV=1	S	Function unknown	interferon-induced protein with tetratricopeptide repeats 2 [Sus scrofa]	molecular function: binding (GO:0005488);; cellular component: cell (GO:0005623);; cellular component: organelle (GO:0043226);; cellular component: cell part (GO:0044464);; biological process: biological regulation (GO:0065007);; biological process: cellular process (GO:0009987);; biological process: response to stimulus (GO:0050896);; biological process: immune system process (GO:0002376);; biol…
ENSSSCG00000010452	IFIT1	13.2202	1262	10.4791	939	12.1257	1144	7.79654	726	23.1495	2307	12.894	1325	18.1298	1809	20.7384	1884	7.8731e-07	-0.812558	down	--	--	Molecular Function: RNA binding (GO:0003723);; Cellular Component: mitochondrion (GO:0005739);; Cellular Component: cytosol (GO:0005829);; Biological Process: negative regulation of cell proliferation (GO:0008285);; Biological Process: cellular response to interferon-alpha (GO:0035457);; Molecular Function: identical protein binding (GO:0042802);; Biological Process: negative regulation of apopto…	K14217|2.8e-97|epz:103565697|K14217 interferon-induced protein with tetratricopeptide repeats 1 | (RefSeq) IFIT1B; interferon induced protein with tetratricopeptide repeats 1B	Hepatitis C (ko05160)	[R]	General function prediction only	Tetratricopeptide repeat	Interferon-induced protein with tetratricopeptide repeats 3 OS=Pan troglodytes OX=9598 GN=IFIT3 PE=2 SV=1	S	Function unknown	interferon-induced protein with tetratricopeptide repeats 3 [Sus scrofa]	molecular function: binding (GO:0005488);; cellular component: cell (GO:0005623);; cellular component: organelle (GO:0043226);; cellular component: cell part (GO:0044464);; biological process: biological regulation (GO:0065007);; biological process: cellular process (GO:0009987);; biological process: response to stimulus (GO:0050896);; biological process: immune system process (GO:0002376);; biol…
ENSSSCG00000010471	KIF11	3.61247	754	3.01083	590	3.25395	670	2.63532	538	7.4268	1622	5.02867	1134	5.45212	1194	3.55526	708	1.79512e-06	-0.812822	down	--	--	Cellular Component: spindle pole (GO:0000922);; Molecular Function: microtubule motor activity (GO:0003777);; Molecular Function: ATP binding (GO:0005524);; Cellular Component: nucleus (GO:0005634);; Cellular Component: cytosol (GO:0005829);; Cellular Component: kinesin complex (GO:0005871);; Cellular Component: microtubule (GO:0005874);; Cellular Component: spindle microtubule (GO:0005876);; Bio…	K10398|0.0e+00|ssc:100526080|K10398 kinesin family member 11 | (RefSeq) KIF11; kinesin-like protein KIF11	--	[Z]	Cytoskeleton	Kinesin motor domain	Kinesin-like protein KIF3A OS=Macaca fascicularis OX=9541 GN=KIF3A PE=2 SV=1	Z	Cytoskeleton	kinesin-like protein KIF11 [Sus scrofa]	cellular component: cell (GO:0005623);; cellular component: organelle (GO:0043226);; cellular component: organelle part (GO:0044422);; cellular component: cell part (GO:0044464);; molecular function: catalytic activity (GO:0003824);; molecular function: binding (GO:0005488);; cellular component: macromolecular complex (GO:0032991);; cellular component: supramolecular complex (GO:0099080);; biolog…
ENSSSCG00000010479	RBP4	19.8792	1363	23.6285	1584	29.4967	1962	17.7157	1159	9.64637	721	8.21033	598	9.65068	695	11.4702	785	7.00793e-14	1.15421	up	--	--	Molecular Function: retinoid binding (GO:0005501);; Molecular Function: retinol transporter activity (GO:0034632);;	K18271|1.2e-109|ssc:397124|K18271 retinol-binding protein 4 | (RefSeq) RBP4; retinol-binding protein 4 precursor	--	--	--	Lipocalin / cytosolic fatty-acid binding protein family	Retinol-binding protein 4 OS=Sus scrofa OX=9823 GN=RBP4 PE=1 SV=2	T	Signal transduction mechanisms	hypothetical protein G4228_010897 [Cervus hanglu yarkandensis]	molecular function: binding (GO:0005488);; molecular function: transporter activity (GO:0005215);; biological process: single-organism process (GO:0044699);; biological process: localization (GO:0051179)
ENSSSCG00000010509	PIK3AP1	1.46908	321	1.78156	374	1.09997	243	1.03591	229	0.541858	129	0.481906	118	0.602071	143	0.733951	160	2.31383e-07	1.11935	up	--	--	Cellular Component: cytosol (GO:0005829);; Cellular Component: plasma membrane (GO:0005886);; Biological Process: positive regulation of phosphatidylinositol 3-kinase signaling (GO:0014068);; Biological Process: toll-like receptor 2 signaling pathway (GO:0034134);; Biological Process: toll-like receptor 4 signaling pathway (GO:0034142);; Biological Process: toll-like receptor 7 signaling pathway …	K12230|0.0e+00|ssc:100155165|K12230 phosphoinositide 3-kinase adapter protein 1 | (RefSeq) PIK3AP1; phosphoinositide 3-kinase adapter protein 1	PI3K-Akt signaling pathway (ko04151);; B cell receptor signaling pathway (ko04662)	--	--	Dof, BCAP, and BANK (DBB) motif,	--	S	Function unknown	phosphoinositide 3-kinase adapter protein 1 isoform X2 [Sus scrofa]	cellular component: cell (GO:0005623);; cellular component: cell part (GO:0044464);; cellular component: membrane (GO:0016020);; biological process: biological regulation (GO:0065007);; biological process: immune system process (GO:0002376);; biological process: cellular process (GO:0009987);; biological process: signaling (GO:0023052);; biological process: single-organism process (GO:0044699);; …
ENSSSCG00000010523	HOGA1	3.02114	270	3.88082	306	2.85737	260	3.83652	264	1.85753	184	1.68641	169	1.97191	171	1.86993	168	1.98961e-05	0.71309	up	[EM]	Amino acid transport and metabolism;; Cell wall/membrane/envelope biogenesis	Molecular Function: lyase activity (GO:0016829);;	K18123|2.0e-154|ssc:100153961|K18123 4-hydroxy-2-oxoglutarate aldolase [EC:4.1.3.16] | (RefSeq) HOGA1; 4-hydroxy-2-oxoglutarate aldolase, mitochondrial	Arginine and proline metabolism (ko00330);; Glyoxylate and dicarboxylate metabolism (ko00630)	--	--	Dihydrodipicolinate synthetase family	4-hydroxy-2-oxoglutarate aldolase, mitochondrial OS=Bos taurus OX=9913 GN=HOGA1 PE=1 SV=1	T	Signal transduction mechanisms	4-hydroxy-2-oxoglutarate aldolase, mitochondrial [Sus scrofa]	molecular function: catalytic activity (GO:0003824)
ENSSSCG00000010536	CNNM1	0.420341	107	0.275975	66	0.308626	89	0.284845	73	0.685512	181	0.579125	177	0.442296	116	0.451167	109	0.00166256	-0.750019	down	[R]	General function prediction only	Cellular Component: integral component of membrane (GO:0016021);;	K16302|0.0e+00|fca:101084741|K16302 metal transporter CNNM | (RefSeq) CNNM1; metal transporter CNNM1 isoform X1	--	[S]	Function unknown	Cyclin M transmembrane N-terminal domain	--	S	Function unknown	metal transporter CNNM1 isoform X1 [Orcinus orca]	cellular component: membrane (GO:0016020);; cellular component: membrane part (GO:0044425)
ENSSSCG00000010554	SCD	1397.99	330918	1429.88	317327	1493.45	347172	1400.09	323805	713.877	176396	697.058	177482	719.945	178161	841.041	190626	2.18454e-30	0.908264	up	[I]	Lipid transport and metabolism	Biological Process: fatty acid biosynthetic process (GO:0006633);; Cellular Component: integral component of membrane (GO:0016021);; Molecular Function: oxidoreductase activity, acting on paired donors, with oxidation of a pair of donors resulting in the reduction of molecular oxygen to two molecules of water (GO:0016717);;	K00507|9.3e-170|ssc:396670|K00507 stearoyl-CoA desaturase (Delta-9 desaturase) [EC:1.14.19.1] | (RefSeq) SCD; acyl-CoA desaturase	Biosynthesis of unsaturated fatty acids (ko01040);; Fatty acid metabolism (ko01212);; PPAR signaling pathway (ko03320);; AMPK signaling pathway (ko04152)	[I]	Lipid transport and metabolism	Fatty acid desaturase	Acyl-CoA desaturase (Fragment) OS=Sus scrofa OX=9823 GN=SCD PE=2 SV=1	I	Lipid transport and metabolism	acyl-CoA desaturase isoform X1 [Sus scrofa]	biological process: metabolic process (GO:0008152);; biological process: cellular process (GO:0009987);; biological process: single-organism process (GO:0044699);; cellular component: membrane (GO:0016020);; cellular component: membrane part (GO:0044425);; molecular function: catalytic activity (GO:0003824)
ENSSSCG00000010559	ENSSSCG00000010559	0.680559	136	0.538708	100	0.646847	108	0.709985	114	0.37033	66	0.316027	64	0.26515	48	0.475668	85	0.00064125	0.830856	up	--	--	Molecular Function: protein binding (GO:0005515);; Cellular Component: cellular_component (GO:0005575);; Cellular Component: intracellular (GO:0005622);; Cellular Component: cell (GO:0005623);; Cellular Component: nucleus (GO:0005634);; Cellular Component: cilium (GO:0005929);; Cellular Component: cell projection (GO:0042995);; Cellular Component: organelle (GO:0043226);; Cellular Component: memb…	K21882|1.6e-287|ssc:100625296|K21882 PDZ domain-containing protein 7 | (RefSeq) PDZD7; LOW QUALITY PROTEIN: PDZ domain-containing protein 7	--	[S]	Function unknown	PDZ domain	PDZ domain-containing protein 7 OS=Pongo abelii OX=9601 GN=PDZD7 PE=2 SV=2	S	Function unknown	LOW QUALITY PROTEIN: PDZ domain-containing protein 7 [Sus scrofa]	molecular function: binding (GO:0005488);; cellular component: cell (GO:0005623);; cellular component: cell part (GO:0044464);; cellular component: organelle (GO:0043226)
ENSSSCG00000010568	NPM3	13.2174	535	10.5496	401	13.1149	524	11.8063	467	25.2592	1070	19.0814	834	20.2457	859	14.492	559	2.67241e-06	-0.731707	down	--	--	Molecular Function: chromatin binding (GO:0003682);; Molecular Function: RNA binding (GO:0003723);; Cellular Component: nucleoplasm (GO:0005654);; Cellular Component: nucleolus (GO:0005730);; Cellular Component: cytoplasm (GO:0005737);; Cellular Component: cytosol (GO:0005829);; Biological Process: chromatin remodeling (GO:0006338);; Biological Process: rRNA processing (GO:0006364);; Biological P…	K11278|2.6e-90|ssc:100627227|K11278 nucleophosmin 3 | (RefSeq) NPM3; nucleoplasmin-3	--	--	--	Nucleoplasmin/nucleophosmin domain	Nucleoplasmin-3 OS=Pongo abelii OX=9601 GN=NPM3 PE=2 SV=3	S	Function unknown	nucleoplasmin-3 [Sus scrofa]	molecular function: binding (GO:0005488);; cellular component: cell (GO:0005623);; cellular component: organelle (GO:0043226);; cellular component: organelle part (GO:0044422);; cellular component: cell part (GO:0044464);; biological process: cellular process (GO:0009987);; biological process: cellular component organization or biogenesis (GO:0071840);; biological process: metabolic process (GO:0…
ENSSSCG00000010629	ADRA2A	5.43737	337	3.9592	230	4.0343	247	5.26865	319	1.68714	110	2.13985	144	2.35022	153	2.43143	144	8.55618e-08	1.07753	up	--	--	Biological Process: positive regulation of cytokine production (GO:0001819);; Molecular Function: G-protein coupled receptor activity (GO:0004930);; Molecular Function: alpha2-adrenergic receptor activity (GO:0004938);; Cellular Component: cytoplasm (GO:0005737);; Cellular Component: integral component of plasma membrane (GO:0005887);; Biological Process: regulation of smooth muscle contraction (…	K04138|1.0e-247|ssc:399501|K04138 adrenergic receptor alpha-2A | (RefSeq) ADRA2A; alpha-2A adrenergic receptor	cGMP-PKG signaling pathway (ko04022);; Neuroactive ligand-receptor interaction (ko04080)	[R]	General function prediction only	7 transmembrane receptor (rhodopsin family)	Alpha-2A adrenergic receptor OS=Sus scrofa OX=9823 GN=ADRA2A PE=1 SV=2	T	Signal transduction mechanisms	RecName: Full=Alpha-2A adrenergic receptor; AltName: Full=Alpha-2A adrenoreceptor; Short=Alpha-2A adrenoceptor; Short=Alpha-2AAR [Sus scrofa]	biological process: biological regulation (GO:0065007);; molecular function: signal transducer activity (GO:0004871);; molecular function: molecular transducer activity (GO:0060089);; biological process: cellular process (GO:0009987);; biological process: signaling (GO:0023052);; biological process: single-organism process (GO:0044699);; biological process: response to stimulus (GO:0050896);; cel…
ENSSSCG00000010772	ADAM8	3.69394	523	4.07715	542	3.96744	555	4.41236	610	1.78389	265	1.86268	284	1.96537	274	2.11597	286	1.0579e-13	1.05122	up	--	--	Biological Process: cell morphogenesis (GO:0000902);; Biological Process: angiogenesis (GO:0001525);; Cellular Component: podosome (GO:0002102);; Biological Process: leukocyte migration involved in inflammatory response (GO:0002523);; Biological Process: positive regulation of acute inflammatory response (GO:0002675);; Molecular Function: metalloendopeptidase activity (GO:0004222);; Molecular Fun…	K06540|0.0e+00|ssc:100156146|K06540 disintegrin and metalloproteinase domain-containing protein 8 [EC:3.4.24.-] | (RefSeq) ADAM8; disintegrin and metalloproteinase domain-containing protein 8	--	[O]	Posttranslational modification, protein turnover, chaperones	Reprolysin (M12B) family zinc metalloprotease	Disintegrin and metalloproteinase domain-containing protein 28 OS=Macaca fascicularis OX=9541 GN=ADAM28 PE=2 SV=1	O	Posttranslational modification, protein turnover, chaperones	disintegrin and metalloproteinase domain-containing protein 8 [Sus scrofa]	biological process: cellular process (GO:0009987);; biological process: developmental process (GO:0032502);; biological process: single-organism process (GO:0044699);; biological process: cellular component organization or biogenesis (GO:0071840);; cellular component: cell (GO:0005623);; cellular component: macromolecular complex (GO:0032991);; cellular component: organelle (GO:0043226);; cellula…
ENSSSCG00000010826	2023-03-02	14.7924	1440	16.301	1586	16.186	1513	14.082	1329	7.55926	811	7.38304	846	8.46306	912	11.2646	892	5.56958e-15	0.80312	up	[R]	General function prediction only	Molecular Function: catalytic activity (GO:0003824);; Cellular Component: integral component of membrane (GO:0016021);; Molecular Function: molybdenum ion binding (GO:0030151);; Molecular Function: pyridoxal phosphate binding (GO:0030170);;	K15631|5.0e-26|cpic:101945849|K15631 molybdenum cofactor sulfurtransferase [EC:2.8.1.9] | (RefSeq) MOCOS; molybdenum cofactor sulfurase	Folate biosynthesis (ko00790)	[R]	General function prediction only	MOSC N-terminal beta barrel domain	Mitochondrial amidoxime reducing component 2 OS=Macaca fascicularis OX=9541 GN=MTARC2 PE=2 SV=1	E	Amino acid transport and metabolism	PREDICTED: mitochondrial amidoxime reducing component 2 [Capra hircus]	molecular function: catalytic activity (GO:0003824);; cellular component: membrane (GO:0016020);; cellular component: membrane part (GO:0044425);; molecular function: binding (GO:0005488)
ENSSSCG00000010831	DUSP10	8.29728	1256	9.05387	1288	10.1052	1510	8.78876	1301	4.69119	744	5.07219	830	5.32331	846	5.61476	811	3.23594e-13	0.772213	up	[T]	Signal transduction mechanisms	Biological Process: regulation of adaptive immune response (GO:0002819);; Molecular Function: protein tyrosine phosphatase activity (GO:0004725);; Cellular Component: Golgi apparatus (GO:0005794);; Cellular Component: cytosol (GO:0005829);; Molecular Function: protein tyrosine/threonine phosphatase activity (GO:0008330);; Molecular Function: JUN kinase binding (GO:0008432);; Biological Process: n…	K20216|1.0e-274|ssc:100517416|K20216 dual specificity phosphatase 10 [EC:3.1.3.16 3.1.3.48] | (RefSeq) DUSP10; dual specificity protein phosphatase 10	MAPK signaling pathway (ko04010)	[V]	Defense mechanisms	Dual specificity phosphatase, catalytic domain	Dual specificity protein phosphatase 10 OS=Bos taurus OX=9913 GN=DUSP10 PE=2 SV=1	V	Defense mechanisms	dual specificity protein phosphatase 10 [Sus scrofa]	biological process: biological regulation (GO:0065007);; molecular function: catalytic activity (GO:0003824);; biological process: metabolic process (GO:0008152);; biological process: cellular process (GO:0009987);; cellular component: cell (GO:0005623);; cellular component: organelle (GO:0043226);; cellular component: cell part (GO:0044464);; molecular function: binding (GO:0005488);; cellular c…
ENSSSCG00000010893	ENSSSCG00000010893	70.5172	13430	66.0278	11895	70.6889	13171	60.5407	11256	37.306	7490	39.0568	8081	43.2461	8673	41.1414	7404	9.01376e-20	0.695394	up	--	--	Molecular Function: opsonin binding (GO:0001846);; Molecular Function: complement binding (GO:0001848);; Molecular Function: complement component C3b binding (GO:0001851);; Biological Process: immune effector process (GO:0002252);; Biological Process: activation of immune response (GO:0002253);; Biological Process: immune system process (GO:0002376);; Biological Process: regulation of acute infla…	K04004|0.0e+00|ssc:397525|K04004 complement factor H | (RefSeq) CFH; complement factor H precursor	Complement and coagulation cascades (ko04610);; Staphylococcus aureus infection (ko05150)	--	--	Sushi repeat (SCR repeat)	Complement factor H OS=Bos taurus OX=9913 GN=CFH PE=1 SV=3	T	Signal transduction mechanisms	complement factor H precursor [Sus scrofa]	molecular function: binding (GO:0005488);; biological process: immune system process (GO:0002376);; biological process: biological regulation (GO:0065007);; cellular component: extracellular region (GO:0005576);; cellular component: extracellular region part (GO:0044421);; cellular component: cell (GO:0005623);; cellular component: cell part (GO:0044464);; cellular component: organelle (GO:004322…
ENSSSCG00000010896	ASPM	1.09849	445	0.85172	324	1.60394	546	1.30921	424	3.18425	1349	2.33818	902	2.02371	860	1.3647	433	3.77124e-05	-0.96306	down	--	--	Biological Process: neuron migration (GO:0001764);; Biological Process: positive regulation of neuroblast proliferation (GO:0002052);; Molecular Function: calmodulin binding (GO:0005516);; Cellular Component: nucleus (GO:0005634);; Cellular Component: cytoplasm (GO:0005737);; Biological Process: spermatogenesis (GO:0007283);; Biological Process: male gonad development (GO:0008584);; Biological Pr…	K16743|0.0e+00|ssc:100520688|K16743 abnormal spindle-like microcephaly-associated protein | (RefSeq) ASPM; LOW QUALITY PROTEIN: abnormal spindle-like microcephaly-associated protein	--	[Z]	Cytoskeleton	IQ calmodulin-binding motif	Abnormal spindle-like microcephaly-associated protein homolog OS=Hylobates lar OX=9580 GN=ASPM PE=3 SV=1	Z	Cytoskeleton	LOW QUALITY PROTEIN: abnormal spindle-like microcephaly-associated protein [Sus scrofa]	biological process: cellular process (GO:0009987);; biological process: locomotion (GO:0040011);; biological process: single-organism process (GO:0044699);; biological process: localization (GO:0051179);; biological process: multicellular organismal process (GO:0032501);; biological process: developmental process (GO:0032502);; biological process: biological regulation (GO:0065007);; molecular fu…
ENSSSCG00000010908	PTPRC	1.43544	309	1.50723	308	1.00787	212	1.35151	288	0.356383	74	0.475358	114	0.539756	118	0.602425	119	1.00211e-10	1.43044	up	[T]	Signal transduction mechanisms	Molecular Function: protein tyrosine phosphatase activity (GO:0004725);; Cellular Component: integral component of membrane (GO:0016021);;	K06478|0.0e+00|ssc:100522631|K06478 receptor-type tyrosine-protein phosphatase C [EC:3.1.3.48] | (RefSeq) PTPRC; LOW QUALITY PROTEIN: receptor-type tyrosine-protein phosphatase C	Cell adhesion molecules (ko04514);; T cell receptor signaling pathway (ko04660);; Fc gamma R-mediated phagocytosis (ko04666);; Salmonella infection (ko05132);; Primary immunodeficiency (ko05340)	[T]	Signal transduction mechanisms	Protein-tyrosine phosphatase	Receptor-type tyrosine-protein phosphatase F OS=Bos taurus OX=9913 GN=PTPRF PE=2 SV=1	T	Signal transduction mechanisms	LOW QUALITY PROTEIN: receptor-type tyrosine-protein phosphatase C [Sus scrofa]	molecular function: catalytic activity (GO:0003824);; biological process: metabolic process (GO:0008152);; biological process: cellular process (GO:0009987);; cellular component: membrane (GO:0016020);; cellular component: membrane part (GO:0044425)
ENSSSCG00000010948	CTSL	83.7975	5892	104.489	6903	74.249	5154	73.3378	5040	53.8555	3966	55.1514	4192	51.2163	3781	50.9963	3422	2.51545e-11	0.628786	up	[O]	Posttranslational modification, protein turnover, chaperones	Molecular Function: fibronectin binding (GO:0001968);; Biological Process: adaptive immune response (GO:0002250);; Molecular Function: cysteine-type endopeptidase activity (GO:0004197);; Molecular Function: collagen binding (GO:0005518);; Cellular Component: extracellular space (GO:0005615);; Cellular Component: lysosome (GO:0005764);; Cellular Component: multivesicular body (GO:0005771);; Cellul…	K01365|6.8e-201|ssc:100515919|K01365 cathepsin L [EC:3.4.22.15] | (RefSeq) CTSL; cathepsin L1	Autophagy - animal (ko04140);; Lysosome (ko04142);; Phagosome (ko04145);; Apoptosis (ko04210);; Antigen processing and presentation (ko04612);; Proteoglycans in cancer (ko05205);; Rheumatoid arthritis (ko05323);; Fluid shear stress and atherosclerosis (ko05418)	[O]	Posttranslational modification, protein turnover, chaperones	Papain family cysteine protease	Procathepsin L OS=Canis lupus familiaris OX=9615 GN=CTSL PE=2 SV=1	O	Posttranslational modification, protein turnover, chaperones	cathepsin L1 [Sus scrofa]	molecular function: binding (GO:0005488);; biological process: immune system process (GO:0002376);; biological process: response to stimulus (GO:0050896);; molecular function: catalytic activity (GO:0003824);; biological process: metabolic process (GO:0008152);; cellular component: extracellular region (GO:0005576);; cellular component: extracellular region part (GO:0044421);; cellular component:…
ENSSSCG00000010959	NTRK2	2.14947	304	2.5006	317	2.1688	292	2.66676	366	1.06468	148	1.07964	152	1.21394	173	1.48009	240	4.73503e-05	0.874136	up	[T]	Signal transduction mechanisms	Molecular Function: transmembrane receptor protein tyrosine kinase activity (GO:0004714);; Molecular Function: neurotrophin receptor activity (GO:0005030);; Molecular Function: ATP binding (GO:0005524);; Cellular Component: integral component of plasma membrane (GO:0005887);; Biological Process: transmembrane receptor protein tyrosine kinase signaling pathway (GO:0007169);;	K04360|0.0e+00|ssc:100519209|K04360 neurotrophic tyrosine kinase receptor type 2 [EC:2.7.10.1] | (RefSeq) NTRK2; BDNF/NT-3 growth factors receptor isoform X1	MAPK signaling pathway (ko04010);; Ras signaling pathway (ko04014);; PI3K-Akt signaling pathway (ko04151);; Neurotrophin signaling pathway (ko04722);; Alcoholism (ko05034)	[TU]	Signal transduction mechanisms;; Intracellular trafficking, secretion, and vesicular transport	Protein tyrosine and serine/threonine kinase	NT-3 growth factor receptor OS=Pan troglodytes OX=9598 GN=NTRK3 PE=2 SV=1	T	Signal transduction mechanisms	BDNF/NT-3 growth factors receptor isoform X1 [Sus scrofa]	molecular function: catalytic activity (GO:0003824);; molecular function: signal transducer activity (GO:0004871);; molecular function: molecular transducer activity (GO:0060089);; biological process: metabolic process (GO:0008152);; biological process: cellular process (GO:0009987);; biological process: signaling (GO:0023052);; biological process: single-organism process (GO:0044699);; biologica…
ENSSSCG00000010962	FRMD3	1.94113	334	2.29654	390	2.33583	346	2.81361	391	1.74759	219	2.50485	384	1.42405	98	1.94611	111	0.00380929	0.914891	up	--	--	Cellular Component: cytoskeleton (GO:0005856);; Molecular Function: cytoskeletal protein binding (GO:0008092);; Cellular Component: integral component of membrane (GO:0016021);; Biological Process: actomyosin structure organization (GO:0031032);;	K06107|2.0e-65|gfr:102035585|K06107 erythrocyte membrane protein band 4.1 | (RefSeq) EPB41; erythrocyte membrane protein band 4.1	--	[R]	General function prediction only	FERM N-terminal domain	FERM domain-containing protein 3 OS=Pongo abelii OX=9601 GN=FRMD3 PE=2 SV=1	S	Function unknown	FERM domain-containing protein 3 isoform X2 [Sus scrofa]	cellular component: cell (GO:0005623);; cellular component: organelle (GO:0043226);; cellular component: cell part (GO:0044464);; molecular function: binding (GO:0005488);; cellular component: membrane (GO:0016020);; cellular component: membrane part (GO:0044425);; biological process: cellular process (GO:0009987);; biological process: single-organism process (GO:0044699);; biological process: ce…
ENSSSCG00000010992	ENSSSCG00000010992	5.00454	724	5.19704	692	5.56458	802	4.44981	620	2.41253	357	2.21016	339	2.34474	355	2.53557	351	5.65973e-16	1.05897	up	[G]	Carbohydrate transport and metabolism	Molecular Function: channel activity (GO:0015267);; Cellular Component: integral component of membrane (GO:0016021);;	K08771|2.1e-170|ssc:100126283|K08771 aquaporin-7 | (RefSeq) AQP7; aquaporin-7	PPAR signaling pathway (ko03320);; Regulation of lipolysis in adipocytes (ko04923)	[G]	Carbohydrate transport and metabolism	Major intrinsic protein	Aquaporin-7 OS=Macaca fascicularis OX=9541 GN=AQP7 PE=2 SV=1	G	Carbohydrate transport and metabolism	aquaporin-7 [Sus scrofa]	molecular function: transporter activity (GO:0005215);; biological process: localization (GO:0051179);; cellular component: membrane (GO:0016020);; cellular component: membrane part (GO:0044425)
ENSSSCG00000011038	MRC1	23.9552	6330	30.5439	7582	19.7204	5150	22.5504	5828	5.26895	1460	8.90141	2546	8.13179	2259	10.2872	2597	1.65632e-20	1.52514	up	[R]	General function prediction only	Cellular Component: plasma membrane (GO:0005886);; Biological Process: receptor-mediated endocytosis (GO:0006898);; Cellular Component: integral component of membrane (GO:0016021);; Molecular Function: signaling receptor activity (GO:0038023);;	K06560|0.0e+00|ssc:445003|K06560 mannose receptor, C type | (RefSeq) MRC1; macrophage mannose receptor 1 precursor	Phagosome (ko04145);; Tuberculosis (ko05152)	[TV]	Signal transduction mechanisms;; Defense mechanisms	Lectin C-type domain	Secretory phospholipase A2 receptor OS=Bos taurus OX=9913 GN=PLA2R1 PE=1 SV=1	--	--	macrophage mannose receptor 1 precursor [Sus scrofa]	cellular component: cell (GO:0005623);; cellular component: membrane (GO:0016020);; cellular component: cell part (GO:0044464);; biological process: localization (GO:0051179);; cellular component: membrane part (GO:0044425);; molecular function: signal transducer activity (GO:0004871);; molecular function: molecular transducer activity (GO:0060089);; biological process: cellular process (GO:00099…
ENSSSCG00000011065	MASTL	0.643624	105	0.419005	63	0.528753	82	0.670025	101	0.993292	167	0.842977	149	0.890331	151	0.824645	129	0.00089613	-0.717774	down	[T]	Signal transduction mechanisms	Molecular Function: protein serine/threonine kinase activity (GO:0004674);; Molecular Function: ATP binding (GO:0005524);;	K16309|0.0e+00|ssc:100514867|K16309 serine/threonine-protein kinase greatwall [EC:2.7.11.1] | (RefSeq) MASTL; serine/threonine-protein kinase greatwall isoform X3	--	[TR]	Signal transduction mechanisms;; General function prediction only	Protein kinase domain	Serine/threonine-protein kinase greatwall OS=Bos taurus OX=9913 GN=MASTL PE=3 SV=1	T	Signal transduction mechanisms	serine/threonine-protein kinase greatwall isoform X1 [Sus scrofa]	molecular function: catalytic activity (GO:0003824);; biological process: metabolic process (GO:0008152);; biological process: cellular process (GO:0009987);; molecular function: binding (GO:0005488)
ENSSSCG00000011129	ITIH5	13.7313	4185	14.3358	4106	17.9483	5401	13.8226	4119	8.47985	2707	8.67088	2857	8.91363	2852	11.4369	3327	1.35275e-08	0.638335	up	[R]	General function prediction only	Molecular Function: serine-type endopeptidase inhibitor activity (GO:0004867);; Biological Process: hyaluronan metabolic process (GO:0030212);;	K19015|4.4e-136|cmk:103187925|K19015 inter-alpha-trypsin inhibitor heavy chain H2 | (RefSeq) itih2; inter-alpha-trypsin inhibitor heavy chain 2	--	--	--	Inter-alpha-trypsin inhibitor heavy chain C-terminus	Inter-alpha-trypsin inhibitor heavy chain H5 OS=Bos taurus OX=9913 GN=ITIH5 PE=2 SV=1	W	Extracellular structures	inter-alpha-trypsin inhibitor heavy chain H5 [Sus scrofa]	molecular function: molecular function regulator (GO:0098772);; biological process: biological regulation (GO:0065007);; biological process: metabolic process (GO:0008152);; biological process: cellular process (GO:0009987);; biological process: single-organism process (GO:0044699)
ENSSSCG00000011194	ANKRD28	6.1738	1786	7.34443	1822	7.16399	1899	6.34081	1793	12.717	3527	10.6055	3075	9.17306	2774	9.14674	2433	1.2923e-12	-0.642952	down	--	--	Molecular Function: protein binding (GO:0005515);;	K15502|1.4e-250|ssc:100152333|K15502 serine/threonine-protein phosphatase 6 regulatory ankyrin repeat subunit A | (RefSeq) ANKRD28; serine/threonine-protein phosphatase 6 regulatory ankyrin repeat subunit A	--	[R]	General function prediction only	Ankyrin repeats (3 copies)	--	S	Function unknown	serine/threonine-protein phosphatase 6 regulatory ankyrin repeat subunit A isoform X1 [Sus scrofa]	molecular function: binding (GO:0005488)
ENSSSCG00000011207	SGO1	1.07541	139	1.05062	127	0.994339	127	0.514353	65	1.84241	248	1.72195	240	1.43363	194	0.86644	107	0.00789866	-0.727854	down	--	--	Biological Process: mitotic sister chromatid segregation (GO:0000070);; Cellular Component: kinetochore (GO:0000776);; Cellular Component: condensed nuclear chromosome, centromeric region (GO:0000780);; Cellular Component: spindle pole (GO:0000922);; Cellular Component: centrosome (GO:0005813);; Cellular Component: cytosol (GO:0005829);; Biological Process: attachment of spindle microtubules to k…	K11580|9.3e-285|ssc:100520101|K11580 shugoshin-like 1 | (RefSeq) SGO1; shugoshin 1	Oocyte meiosis (ko04114)	--	--	Shugoshin N-terminal coiled-coil region	--	K	Transcription	shugoshin 1 [Sus scrofa]	biological process: cellular process (GO:0009987);; biological process: single-organism process (GO:0044699);; biological process: cellular component organization or biogenesis (GO:0071840);; cellular component: cell (GO:0005623);; cellular component: macromolecular complex (GO:0032991);; cellular component: organelle (GO:0043226);; cellular component: organelle part (GO:0044422);; cellular compo…
ENSSSCG00000011250	ACAA1	46.1616	8540	43.9796	7644	37.0651	6768	43.4839	7862	26.1392	5064	24.8841	4976	25.6959	4990	27.6005	4872	2.07242e-18	0.672559	up	[I]	Lipid transport and metabolism	Biological Process: very long-chain fatty acid metabolic process (GO:0000038);; Molecular Function: acetyl-CoA C-acyltransferase activity (GO:0003988);; Cellular Component: peroxisome (GO:0005777);; Biological Process: fatty acid beta-oxidation (GO:0006635);; Biological Process: bile acid metabolic process (GO:0008206);; Biological Process: phenylacetate catabolic process (GO:0010124);; Molecular…	K07513|5.2e-233|ssc:100515577|K07513 acetyl-CoA acyltransferase 1 [EC:2.3.1.16] | (RefSeq) ACAA1; 3-ketoacyl-CoA thiolase, peroxisomal isoform X1	Fatty acid degradation (ko00071);; Valine, leucine and isoleucine degradation (ko00280);; alpha-Linolenic acid metabolism (ko00592);; Biosynthesis of unsaturated fatty acids (ko01040);; Fatty acid metabolism (ko01212);; PPAR signaling pathway (ko03320);; Peroxisome (ko04146)	[I]	Lipid transport and metabolism	Thiolase, N-terminal domain	3-ketoacyl-CoA thiolase, mitochondrial OS=Bos taurus OX=9913 GN=ACAA2 PE=2 SV=1	I	Lipid transport and metabolism	3-ketoacyl-CoA thiolase, peroxisomal isoform X1 [Sus scrofa]	biological process: metabolic process (GO:0008152);; biological process: cellular process (GO:0009987);; biological process: single-organism process (GO:0044699);; molecular function: catalytic activity (GO:0003824);; cellular component: cell (GO:0005623);; cellular component: organelle (GO:0043226);; cellular component: cell part (GO:0044464);; biological process: response to stimulus (GO:005089…
ENSSSCG00000011299	CLEC3B	6.37128	400	7.85652	463	6.13548	380	6.21389	381	4.47101	294	3.16739	215	3.87259	255	3.71549	223	1.85065e-06	0.765038	up	--	--	Biological Process: ossification (GO:0001503);; Cellular Component: granular component (GO:0001652);; Molecular Function: calcium ion binding (GO:0005509);; Cellular Component: extracellular space (GO:0005615);; Cellular Component: cytoplasm (GO:0005737);; Molecular Function: heparin binding (GO:0008201);; Biological Process: positive regulation of plasminogen activation (GO:0010756);; Molecular …	K17520|1.9e-113|ssc:100620511|K17520 C-type lectin domain family 3 member B | (RefSeq) CLEC3B; tetranectin	--	[TV]	Signal transduction mechanisms;; Defense mechanisms	Lectin C-type domain	Tetranectin OS=Bos taurus OX=9913 GN=CLEC3B PE=2 SV=1	--	--	tetranectin [Sus scrofa]	biological process: multicellular organismal process (GO:0032501);; biological process: single-organism process (GO:0044699);; cellular component: cell (GO:0005623);; cellular component: membrane-enclosed lumen (GO:0031974);; cellular component: organelle (GO:0043226);; cellular component: organelle part (GO:0044422);; cellular component: cell part (GO:0044464);; molecular function: binding (GO:0…
ENSSSCG00000011309	KIF15	1.21391	282	1.06615	233	1.23057	282	0.730477	166	2.81394	683	1.55061	389	1.77826	433	0.851817	189	0.0060776	-0.7531	down	--	--	Molecular Function: microtubule motor activity (GO:0003777);; Molecular Function: ATP binding (GO:0005524);; Cellular Component: kinesin complex (GO:0005871);; Cellular Component: microtubule (GO:0005874);; Biological Process: microtubule-based movement (GO:0007018);; Molecular Function: microtubule binding (GO:0008017);; Molecular Function: ATPase activity (GO:0016887);;	K10400|0.0e+00|ssc:100738172|K10400 kinesin family member 15 | (RefSeq) KIF15; kinesin-like protein KIF15 isoform X1	--	[Z]	Cytoskeleton	Kinesin motor domain	Kinesin-like protein KIF3A OS=Macaca fascicularis OX=9541 GN=KIF3A PE=2 SV=1	Z	Cytoskeleton	kinesin-like protein KIF15 isoform X1 [Sus scrofa]	molecular function: catalytic activity (GO:0003824);; molecular function: binding (GO:0005488);; cellular component: cell (GO:0005623);; cellular component: macromolecular complex (GO:0032991);; cellular component: organelle (GO:0043226);; cellular component: organelle part (GO:0044422);; cellular component: cell part (GO:0044464);; cellular component: supramolecular complex (GO:0099080);; biolog…
ENSSSCG00000011322	CCR1	2.23006	299	2.38532	300	1.76918	234	2.69195	352	0.958539	135	0.896855	130	0.833787	117	1.34273	172	8.50822e-08	1.13243	up	--	--	Molecular Function: phosphatidylinositol phospholipase C activity (GO:0004435);; Cellular Component: cytoplasm (GO:0005737);; Biological Process: calcium ion transport (GO:0006816);; Biological Process: exocytosis (GO:0006887);; Biological Process: chemotaxis (GO:0006935);; Biological Process: inflammatory response (GO:0006954);; Biological Process: immune response (GO:0006955);; Biological Proce…	K04176|7.1e-196|ssc:414374|K04176 C-C chemokine receptor type 1 | (RefSeq) CCR1; C-C chemokine receptor type 1	Cytokine-cytokine receptor interaction (ko04060);; Viral protein interaction with cytokine and cytokine receptor (ko04061);; Chemokine signaling pathway (ko04062);; Human cytomegalovirus infection (ko05163);; Kaposi sarcoma-associated herpesvirus infection (ko05167)	[R]	General function prediction only	7 transmembrane receptor (rhodopsin family)	C-C chemokine receptor type 1 OS=Macaca mulatta OX=9544 GN=CCR1 PE=2 SV=1	T	Signal transduction mechanisms	C-C chemokine receptor type 1 [Sus scrofa]	molecular function: catalytic activity (GO:0003824);; cellular component: cell (GO:0005623);; cellular component: cell part (GO:0044464);; biological process: localization (GO:0051179);; biological process: cellular process (GO:0009987);; biological process: single-organism process (GO:0044699);; biological process: locomotion (GO:0040011);; biological process: response to stimulus (GO:0050896);;…
ENSSSCG00000011358	TREX1	5.67637	439	6.28364	456	7.36789	562	5.02349	380	3.17484	257	3.01492	252	3.00205	244	4.03955	298	6.77709e-07	0.843151	up	--	--	Molecular Function: magnesium ion binding (GO:0000287);; Biological Process: blood vessel development (GO:0001568);; Biological Process: kidney development (GO:0001822);; Biological Process: activation of immune response (GO:0002253);; Biological Process: macrophage activation involved in immune response (GO:0002281);; Biological Process: lymphoid progenitor cell differentiation (GO:0002320);; Bi…	K10790|3.2e-176|ssc:100155669|K10790 three prime repair exonuclease 1 [EC:3.1.11.2] | (RefSeq) TREX1; three-prime repair exonuclease 1	Cytosolic DNA-sensing pathway (ko04623)	[L]	Replication, recombination and repair	--	Three-prime repair exonuclease 1 OS=Bos taurus OX=9913 GN=TREX1 PE=1 SV=1	L	Replication, recombination and repair	three-prime repair exonuclease 1 [Sus scrofa]	molecular function: binding (GO:0005488);; biological process: developmental process (GO:0032502);; biological process: single-organism process (GO:0044699);; biological process: multicellular organismal process (GO:0032501);; biological process: immune system process (GO:0002376);; biological process: biological regulation (GO:0065007);; biological process: cellular process (GO:0009987);; biolog…
ENSSSCG00000011386	MST1	0.699008	70	0.510905	48	0.695135	68	0.850034	84	0.299824	32	0.359757	39	0.4088	43	0.332272	32	0.000532524	0.931248	up	[O]	Posttranslational modification, protein turnover, chaperones	Molecular Function: serine-type endopeptidase activity (GO:0004252);; Cellular Component: vacuole (GO:0005773);; Biological Process: embryo implantation (GO:0007566);; Biological Process: positive regulation of gene expression (GO:0010628);; Biological Process: regulation of macrophage chemotaxis (GO:0010758);; Biological Process: positive regulation of mammary gland epithelial cell proliferation…	K23441|0.0e+00|ssc:100512987|K23441 hepatocyte growth factor-like protein | (RefSeq) MST1; hepatocyte growth factor-like protein isoform X6	--	--	--	Kringle domain	Hepatocyte growth factor-like protein OS=Bos taurus OX=9913 GN=MST1 PE=2 SV=1	T	Signal transduction mechanisms	hepatocyte growth factor-like protein isoform X6 [Sus scrofa]	molecular function: catalytic activity (GO:0003824);; biological process: metabolic process (GO:0008152);; cellular component: cell (GO:0005623);; cellular component: organelle (GO:0043226);; cellular component: cell part (GO:0044464);; biological process: reproduction (GO:0000003);; biological process: reproductive process (GO:0022414);; biological process: single-organism process (GO:0044699);;…
ENSSSCG00000011434	ENSSSCG00000011434	12.0731	1121	11.083	1028	11.9921	1168	9.43273	897	6.82368	701	7.28252	777	6.93074	714	7.26048	660	1.89646e-08	0.607009	up	--	--	Molecular Function: protein serine/threonine phosphatase activity (GO:0004722);; Molecular Function: magnesium-dependent protein serine/threonine phosphatase activity (GO:0004724);; Molecular Function: [pyruvate dehydrogenase (lipoamide)] phosphatase activity (GO:0004741);; Cellular Component: mitochondrion (GO:0005739);; Biological Process: positive regulation of pyruvate dehydrogenase activity …	K17507|1.0e-267|ssc:100524901|K17507 protein phosphatase 1M [EC:3.1.3.16] | (RefSeq) PPM1M; protein phosphatase 1M isoform X1	--	[T]	Signal transduction mechanisms	Protein phosphatase 2C	Integrin-linked kinase-associated serine/threonine phosphatase 2C OS=Bos taurus OX=9913 GN=ILKAP PE=2 SV=1	T	Signal transduction mechanisms	protein phosphatase 1M isoform X1 [Sus scrofa]	molecular function: catalytic activity (GO:0003824);; biological process: metabolic process (GO:0008152);; biological process: cellular process (GO:0009987);; cellular component: cell (GO:0005623);; cellular component: organelle (GO:0043226);; cellular component: cell part (GO:0044464);; biological process: biological regulation (GO:0065007)
ENSSSCG00000011436	ENSSSCG00000011436	0.168318	54	0.25886	78	0.298693	94	0.203355	64	0.044646	15	0.097734	34	0.107655	36	0.094547	29	7.16794e-06	1.38888	up	--	--	Biological Process: response to molecule of bacterial origin (GO:0002237);; Biological Process: MyD88-dependent toll-like receptor signaling pathway (GO:0002755);; Molecular Function: transmembrane signaling receptor activity (GO:0004888);; Cellular Component: integral component of membrane (GO:0016021);; Biological Process: toll-like receptor 9 signaling pathway (GO:0034162);; Biological Process…	K10161|0.0e+00|ssc:397007|K10161 toll-like receptor 9 | (RefSeq) TLR9; toll-like receptor 9 precursor	Toll-like receptor signaling pathway (ko04620);; Salmonella infection (ko05132);; Chagas disease (ko05142);; African trypanosomiasis (ko05143);; Malaria (ko05144);; Tuberculosis (ko05152);; Measles (ko05162);; Herpes simplex virus 1 infection (ko05168);; PD-L1 expression and PD-1 checkpoint pathway in cancer (ko05235)	[T]	Signal transduction mechanisms	Leucine rich repeat	Toll-like receptor 9 OS=Sus scrofa OX=9823 GN=TLR9 PE=2 SV=1	T	Signal transduction mechanisms	RecName: Full=Toll-like receptor 9; AltName: CD_antigen=CD289; Flags: Precursor [Sus scrofa]	biological process: response to stimulus (GO:0050896);; biological process: immune system process (GO:0002376);; biological process: cellular process (GO:0009987);; biological process: signaling (GO:0023052);; biological process: single-organism process (GO:0044699);; biological process: biological regulation (GO:0065007);; molecular function: signal transducer activity (GO:0004871);; molecular f…
ENSSSCG00000011443	STAB1	7.3791	3102	8.71024	3350	5.97294	2064	8.3186	3592	2.30638	847	2.86553	1462	2.73302	1018	3.35687	1398	4.91564e-14	1.39462	up	[R]	General function prediction only	Molecular Function: low-density lipoprotein receptor activity (GO:0005041);; Molecular Function: scavenger receptor activity (GO:0005044);; Molecular Function: calcium ion binding (GO:0005509);; Molecular Function: hyaluronic acid binding (GO:0005540);; Cellular Component: integral component of plasma membrane (GO:0005887);; Biological Process: cell adhesion (GO:0007155);; Biological Process: cel…	K19020|0.0e+00|ssc:100525609|K19020 stabilin-1 | (RefSeq) STAB1; stabilin-1 isoform X1	--	[T]	Signal transduction mechanisms	Fasciclin domain	Transforming growth factor-beta-induced protein ig-h3 OS=Bos taurus OX=9913 GN=TGFBI PE=1 SV=2	T	Signal transduction mechanisms	stabilin-1 isoform X2 [Sus scrofa]	molecular function: molecular transducer activity (GO:0060089);; biological process: localization (GO:0051179);; molecular function: binding (GO:0005488);; cellular component: cell (GO:0005623);; cellular component: membrane (GO:0016020);; cellular component: membrane part (GO:0044425);; cellular component: cell part (GO:0044464);; biological process: biological adhesion (GO:0022610);; biological…
ENSSSCG00000011451	ITIH3	13.4277	2351	8.57752	1111	11.2064	1913	7.9134	2091	7.21208	1343	3.17952	795	7.3524	1205	5.79582	985	7.85819e-06	0.827072	up	[R]	General function prediction only	Molecular Function: serine-type endopeptidase inhibitor activity (GO:0004867);; Biological Process: hyaluronan metabolic process (GO:0030212);;	K19014|2.1e-289|oaa:100091835|K19014 inter-alpha-trypsin inhibitor heavy chain H1 | (RefSeq) inter-alpha-trypsin inhibitor heavy chain H3-like isoform X1	--	--	--	Inter-alpha-trypsin inhibitor heavy chain C-terminus	Inter-alpha-trypsin inhibitor heavy chain H3 OS=Bos taurus OX=9913 GN=ITIH3 PE=1 SV=2	T	Signal transduction mechanisms	inter-alpha-trypsin inhibitor heavy chain H3 precursor [Sus scrofa]	molecular function: molecular function regulator (GO:0098772);; biological process: biological regulation (GO:0065007);; biological process: metabolic process (GO:0008152);; biological process: cellular process (GO:0009987);; biological process: single-organism process (GO:0044699)
ENSSSCG00000011453	ITIH4	60.62	8698	53.4368	7319	51.6317	8003	48.1937	7174	29.4266	4654	27.8132	4527	29.5463	4768	28.7884	4192	3.0981e-31	0.824937	up	[R]	General function prediction only	Biological Process: acute inflammatory response (GO:0002526);; Biological Process: platelet degranulation (GO:0002576);; Molecular Function: molecular_function (GO:0003674);; Molecular Function: enzyme inhibitor activity (GO:0004857);; Molecular Function: endopeptidase inhibitor activity (GO:0004866);; Cellular Component: cellular_component (GO:0005575);; Cellular Component: extracellular region …	K19014|4.4e-151|oaa:100091835|K19014 inter-alpha-trypsin inhibitor heavy chain H1 | (RefSeq) inter-alpha-trypsin inhibitor heavy chain H3-like isoform X1	--	--	--	Vault protein inter-alpha-trypsin domain	Inter-alpha-trypsin inhibitor heavy chain H4 OS=Sus scrofa OX=9823 GN=ITIH4 PE=1 SV=1	T	Signal transduction mechanisms	inter-alpha-trypsin inhibitor heavy chain H4 isoform X10 [Sus scrofa]	biological process: response to stimulus (GO:0050896);; biological process: cellular process (GO:0009987);; biological process: single-organism process (GO:0044699);; biological process: localization (GO:0051179);; molecular function: molecular function regulator (GO:0098772);; biological process: biological regulation (GO:0065007);; cellular component: extracellular region (GO:0005576);; cellula…
ENSSSCG00000011470	ABHD6	5.88669	619	6.12113	592	7.70293	782	6.16383	611	3.24521	345	4.13269	460	3.89551	423	4.32402	427	2.71817e-06	0.695562	up	[I]	Lipid transport and metabolism	Molecular Function: phospholipase activity (GO:0004620);; Cellular Component: mitochondrion (GO:0005739);; Cellular Component: lysosomal membrane (GO:0005765);; Biological Process: phospholipid catabolic process (GO:0009395);; Biological Process: negative regulation of cell migration (GO:0030336);; Cellular Component: late endosome membrane (GO:0031902);; Cellular Component: AMPA glutamate recept…	K13700|1.0e-196|ssc:100515411|K13700 abhydrolase domain-containing protein 6 [EC:3.1.1.23] | (RefSeq) ABHD6; monoacylglycerol lipase ABHD6 isoform X1	Retrograde endocannabinoid signaling (ko04723)	[R]	General function prediction only	Alpha/beta hydrolase family	Monoacylglycerol lipase ABHD6 OS=Bos taurus OX=9913 GN=ABHD6 PE=2 SV=1	S	Function unknown	monoacylglycerol lipase ABHD6 isoform X1 [Sus scrofa]	molecular function: catalytic activity (GO:0003824);; cellular component: cell (GO:0005623);; cellular component: organelle (GO:0043226);; cellular component: cell part (GO:0044464);; cellular component: membrane (GO:0016020);; cellular component: organelle part (GO:0044422);; biological process: metabolic process (GO:0008152);; biological process: cellular process (GO:0009987);; biological proce…
ENSSSCG00000011511	FRMD4B	0.530692	188	0.504824	173	0.406575	146	0.336456	114	0.207807	81	0.375394	142	0.285545	107	0.22508	80	0.00729664	0.644928	up	--	--	Cellular Component: cytoskeleton (GO:0005856);;	K05763|3.0e-34|ncc:104953806|K05763 moesin | (RefSeq) moesin-like	Tight junction (ko04530);; Regulation of actin cytoskeleton (ko04810)	[R]	General function prediction only	Cytohesin Ubiquitin Protein Inducing Domain	--	S	Function unknown	FERM domain-containing protein 4B isoform X2 [Sus scrofa]	cellular component: cell (GO:0005623);; cellular component: organelle (GO:0043226);; cellular component: cell part (GO:0044464)
ENSSSCG00000011553	ENSSSCG00000011553	26.0623	5309	27.3945	5149	26.971	5403	22.0506	4308	16.1625	3399	15.2869	3333	16.8294	3561	18.1369	3455	8.30388e-13	0.593409	up	--	--	Biological Process: protein polyglycylation (GO:0018094);; Molecular Function: protein-glycine ligase activity (GO:0070735);;	K16608|0.0e+00|ssc:106505668|K16608 tubulin monoglycylase TTLL3/8 [EC:6.3.2.-] | (RefSeq) TTLL3; tubulin monoglycylase TTLL3 isoform X1	--	[O]	Posttranslational modification, protein turnover, chaperones	Tubulin-tyrosine ligase family	Probable tubulin polyglutamylase TTLL9 OS=Bos taurus OX=9913 GN=TTLL9 PE=2 SV=1	O	Posttranslational modification, protein turnover, chaperones	tubulin monoglycylase TTLL3 isoform X2 [Sus scrofa]	biological process: metabolic process (GO:0008152);; biological process: cellular process (GO:0009987);; molecular function: catalytic activity (GO:0003824)
ENSSSCG00000011557	CIDEC	107.969	6102	110.153	5849	114.635	6395	108.012	5967	49.1221	2907	46.2578	2826	52.3094	3104	57.7769	3116	5.13673e-39	1.06481	up	--	--	Biological Process: apoptotic process (GO:0006915);;	K01092|4.5e-37|oor:101277209|K01092 myo-inositol-1(or 4)-monophosphatase [EC:3.1.3.25] | (RefSeq) inositol monophosphatase 2 isoform X1	Inositol phosphate metabolism (ko00562);; Phosphatidylinositol signaling system (ko04070)	--	--	CIDE-N domain	Cell death activator CIDE-3 OS=Bos taurus OX=9913 GN=CIDEC PE=2 SV=1	K	Transcription	cell death activator CIDE-3 [Sus scrofa]	biological process: cellular process (GO:0009987);; biological process: single-organism process (GO:0044699)
ENSSSCG00000011579	PPARG	43.8648	3614	49.454	3830	55.2313	4500	43.7279	3538	24.0956	2077	21.761	1940	23.9199	2076	24.9777	1966	1.30688e-27	0.986126	up	--	--	Molecular Function: steroid hormone receptor activity (GO:0003707);; Molecular Function: RNA polymerase II transcription factor activity, ligand-activated sequence-specific DNA binding (GO:0004879);; Cellular Component: nucleus (GO:0005634);; Cellular Component: cytoplasm (GO:0005737);; Molecular Function: zinc ion binding (GO:0008270);; Cellular Component: host cell nucleus (GO:0042025);; Molecu…	K08530|7.1e-276|ssc:397671|K08530 peroxisome proliferator-activated receptor gamma | (RefSeq) PPARG; peroxisome proliferator-activated receptor gamma	PPAR signaling pathway (ko03320);; AMPK signaling pathway (ko04152);; Longevity regulating pathway (ko04211);; Osteoclast differentiation (ko04380);; Thermogenesis (ko04714);; Huntington disease (ko05016);; Pathways in cancer (ko05200);; Transcriptional misregulation in cancer (ko05202);; Thyroid cancer (ko05216)	[T]	Signal transduction mechanisms	PPAR gamma N-terminal region	Peroxisome proliferator-activated receptor gamma OS=Sus scrofa OX=9823 GN=PPARG PE=2 SV=1	K	Transcription	peroxisome proliferator-activated receptor gamma [Sus scrofa]	molecular function: signal transducer activity (GO:0004871);; molecular function: molecular transducer activity (GO:0060089);; biological process: cellular process (GO:0009987);; biological process: signaling (GO:0023052);; biological process: single-organism process (GO:0044699);; biological process: response to stimulus (GO:0050896);; biological process: biological regulation (GO:0065007);; mol…
ENSSSCG00000011600	SLC6A6	7.84946	2204	7.32991	1970	7.69348	2173	7.29258	2039	3.70742	1111	3.55056	1078	3.5962	1080	4.1521	1134	1.21253e-28	0.970146	up	[R]	General function prediction only	Molecular Function: taurine:sodium symporter activity (GO:0005369);; Cellular Component: integral component of plasma membrane (GO:0005887);; Biological Process: neurotransmitter transport (GO:0006836);;	K05039|0.0e+00|ssc:106504129|K05039 solute carrier family 6 (neurotransmitter transporter, taurine) member 6 | (RefSeq) SLC6A6; sodium- and chloride-dependent taurine transporter	--	[T]	Signal transduction mechanisms	Sodium:neurotransmitter symporter family	Sodium- and chloride-dependent taurine transporter OS=Canis lupus familiaris OX=9615 GN=SLC6A6 PE=1 SV=2	T	Signal transduction mechanisms	sodium- and chloride-dependent taurine transporter isoform X2 [Sus scrofa]	molecular function: transporter activity (GO:0005215);; biological process: single-organism process (GO:0044699);; biological process: localization (GO:0051179);; cellular component: cell (GO:0005623);; cellular component: membrane (GO:0016020);; cellular component: membrane part (GO:0044425);; cellular component: cell part (GO:0044464)
ENSSSCG00000011610	NUP210	0.310508	94	0.338297	97	0.153286	48	0.277349	83	0.077495	26	0.062	22	0.051482	17	0.105252	32	1.76494e-08	1.7605	up	--	--	Cellular Component: integral component of membrane (GO:0016021);;	K14314|0.0e+00|ssc:100515926|K14314 nuclear pore complex protein Nup210 | (RefSeq) NUP210; nuclear pore membrane glycoprotein 210	RNA transport (ko03013);; Amyotrophic lateral sclerosis (ko05014)	[YU]	Nuclear structure;; Intracellular trafficking, secretion, and vesicular transport	Bacterial Ig-like domain (group 2)	--	--	--	nuclear pore membrane glycoprotein 210 [Sus scrofa]	cellular component: membrane (GO:0016020);; cellular component: membrane part (GO:0044425)
ENSSSCG00000011693	ZIC4	0.463526	87	0.239855	60	0.402188	83	0.328611	54	0.131495	30	0.086046	26	0.149662	44	0.20354	41	0.000256197	1.04037	up	--	--	Molecular Function: RNA polymerase II regulatory region sequence-specific DNA binding (GO:0000977);; Molecular Function: RNA polymerase II transcription factor activity, sequence-specific DNA binding (GO:0000981);; Cellular Component: nucleus (GO:0005634);; Biological Process: regulation of transcription from RNA polymerase II promoter (GO:0006357);; Biological Process: central nervous system dev…	K09225|7.3e-141|ssc:100519623|K09225 zinc finger protein ZIC 4 | (RefSeq) ZIC4; LOW QUALITY PROTEIN: zinc finger protein ZIC 4	--	[R]	General function prediction only	Zic proteins zinc finger domain	--	S	Function unknown	LOW QUALITY PROTEIN: zinc finger protein ZIC 4 [Sus scrofa]	molecular function: binding (GO:0005488);; molecular function: nucleic acid binding transcription factor activity (GO:0001071);; biological process: biological regulation (GO:0065007);; cellular component: cell (GO:0005623);; cellular component: organelle (GO:0043226);; cellular component: cell part (GO:0044464);; biological process: multicellular organismal process (GO:0032501);; biological proc…
ENSSSCG00000011717	IGSF10	0.311264	129	0.372635	145	0.595142	243	0.289038	117	0.209884	91	0.252562	113	0.262483	114	0.170307	68	0.00372423	0.769649	up	--	--	Cellular Component: extracellular region (GO:0005576);; Biological Process: regulation of neuron migration (GO:2001222);;	K17341|2.2e-92|lcf:108878444|K17341 hemicentin | (RefSeq) hmcn2; hemicentin-2 isoform X1	--	[R]	General function prediction only	Immunoglobulin I-set domain	Opioid-binding protein/cell adhesion molecule OS=Bos taurus OX=9913 GN=OPCML PE=1 SV=1	T	Signal transduction mechanisms	immunoglobulin superfamily member 10 isoform X1 [Sus scrofa]	cellular component: extracellular region (GO:0005576);; biological process: cellular process (GO:0009987);; biological process: multicellular organismal process (GO:0032501);; biological process: developmental process (GO:0032502);; biological process: single-organism process (GO:0044699);; biological process: biological regulation (GO:0065007)
ENSSSCG00000011721	P2RY1	1.26276	372	1.70683	473	1.04786	305	0.996017	287	0.763779	236	0.789846	252	0.796319	247	0.857978	242	0.00107744	0.599014	up	--	--	Molecular Function: ADP receptor activity (GO:0001621);; Molecular Function: ATP binding (GO:0005524);; Cellular Component: integral component of plasma membrane (GO:0005887);; Cellular Component: cilium (GO:0005929);; Biological Process: phospholipase C-activating G-protein coupled receptor signaling pathway (GO:0007200);; Biological Process: regulation of cell shape (GO:0008360);; Biological Pr…	K04270|7.1e-207|ssc:503666|K04270 P2Y purinoceptor 1 | (RefSeq) P2RY1; P2Y purinoceptor 1	Rap1 signaling pathway (ko04015);; Neuroactive ligand-receptor interaction (ko04080);; Platelet activation (ko04611);; Taste transduction (ko04742)	--	--	7 transmembrane receptor (rhodopsin family)	P2Y purinoceptor 1 OS=Bos taurus OX=9913 GN=P2RY1 PE=2 SV=1	T	Signal transduction mechanisms	P2Y purinoceptor 1 [Sus scrofa]	molecular function: signal transducer activity (GO:0004871);; molecular function: molecular transducer activity (GO:0060089);; biological process: cellular process (GO:0009987);; biological process: signaling (GO:0023052);; biological process: single-organism process (GO:0044699);; biological process: response to stimulus (GO:0050896);; biological process: biological regulation (GO:0065007);; mol…
ENSSSCG00000011723	MME	2.21302	610	1.97784	487	1.92059	529	1.85373	505	1.03588	303	1.35965	410	1.41586	414	1.19043	317	3.15087e-05	0.605396	up	[O]	Posttranslational modification, protein turnover, chaperones	Molecular Function: phosphatidylserine binding (GO:0001786);; Biological Process: kidney development (GO:0001822);; Molecular Function: metalloendopeptidase activity (GO:0004222);; Cellular Component: early endosome (GO:0005769);; Cellular Component: trans-Golgi network (GO:0005802);; Cellular Component: plasma membrane (GO:0005886);; Cellular Component: brush border (GO:0005903);; Biological Pro…	K01389|0.0e+00|ssc:100511536|K01389 neprilysin [EC:3.4.24.11] | (RefSeq) MME; neprilysin	Renin-angiotensin system (ko04614);; Hematopoietic cell lineage (ko04640);; Protein digestion and absorption (ko04974);; Alzheimer disease (ko05010)	[E]	Amino acid transport and metabolism	Peptidase family M13	Neprilysin OS=Oryctolagus cuniculus OX=9986 GN=MME PE=1 SV=2	E	Amino acid transport and metabolism	neprilysin [Sus scrofa]	molecular function: binding (GO:0005488);; biological process: multicellular organismal process (GO:0032501);; biological process: developmental process (GO:0032502);; biological process: single-organism process (GO:0044699);; molecular function: catalytic activity (GO:0003824);; biological process: metabolic process (GO:0008152);; cellular component: cell (GO:0005623);; cellular component: organ…
ENSSSCG00000011826	TMEM44	1.01614	123	0.969963	109	1.60313	176	1.18567	139	2.53077	295	1.59909	205	2.25624	261	1.19279	138	0.0061079	-0.657518	down	--	--	Cellular Component: integral component of membrane (GO:0016021);;	--	--	--	--	--	--	S	Function unknown	transmembrane protein 44 isoform X1 [Sus scrofa]	cellular component: membrane (GO:0016020);; cellular component: membrane part (GO:0044425)
ENSSSCG00000011874	PARP14	1.01542	256	0.664924	158	0.717911	179	0.645789	159	1.92232	490	0.934759	255	1.55626	411	1.52248	354	9.61111e-06	-0.967984	down	[J]	Translation, ribosomal structure and biogenesis	Molecular Function: RNA binding (GO:0003723);; Molecular Function: NAD+ ADP-ribosyltransferase activity (GO:0003950);; Cellular Component: cytosol (GO:0005829);; Cellular Component: plasma membrane (GO:0005886);; Biological Process: negative regulation of gene expression (GO:0010629);; Molecular Function: enzyme binding (GO:0019899);; Biological Process: positive regulation of tyrosine phosphoryl…	K15261|0.0e+00|ssc:100153948|K15261 poly [ADP-ribose] polymerase 10/14/15 [EC:2.4.2.30] | (RefSeq) PARP14; poly [ADP-ribose] polymerase 14 isoform X1	--	--	--	Macro domain	--	--	--	poly [ADP-ribose] polymerase 14 isoform X2 [Sus scrofa]	molecular function: binding (GO:0005488);; molecular function: catalytic activity (GO:0003824);; cellular component: cell (GO:0005623);; cellular component: cell part (GO:0044464);; cellular component: membrane (GO:0016020);; biological process: biological regulation (GO:0065007)
ENSSSCG00000011884	HCLS1	1.98534	361	2.80883	479	1.38202	248	1.87946	334	0.704823	134	0.902131	177	0.954235	182	0.98372	171	1.66722e-07	1.14023	up	--	--	Molecular Function: actin binding (GO:0003779);; Biological Process: actin filament polymerization (GO:0030041);;	K06106|3.0e-176|ssc:100521992|K06106 cortactin | (RefSeq) HCLS1; hematopoietic lineage cell-specific protein	Tight junction (ko04530);; Bacterial invasion of epithelial cells (ko05100);; Proteoglycans in cancer (ko05205)	--	--	Repeat in HS1/Cortactin	Drebrin-like protein OS=Bos taurus OX=9913 GN=DBNL PE=2 SV=1	T	Signal transduction mechanisms	hematopoietic lineage cell-specific protein [Sus scrofa]	molecular function: binding (GO:0005488);; biological process: cellular process (GO:0009987);; biological process: single-organism process (GO:0044699);; biological process: cellular component organization or biogenesis (GO:0071840)
ENSSSCG00000012077	MX1	40.8008	4159	25.5278	2445	23.9281	2408	23.2685	2319	57.4149	6128	36.4396	4016	47.4823	5081	49.0893	4775	2.6974e-07	-0.785481	down	--	--	Biological Process: mitochondrial fission (GO:0000266);; Molecular Function: GTPase activity (GO:0003924);; Molecular Function: GTP binding (GO:0005525);; Cellular Component: nucleus (GO:0005634);; Cellular Component: cytoplasm (GO:0005737);; Cellular Component: cytosol (GO:0005829);; Cellular Component: plasma membrane (GO:0005886);; Molecular Function: microtubule binding (GO:0008017);; Cellula…	K14754|0.0e+00|ssc:397128|K14754 interferon-induced GTP-binding protein Mx | (RefSeq) MX1; interferon-induced GTP-binding protein Mx1	Hepatitis C (ko05160);; Measles (ko05162);; Influenza A (ko05164);; Human papillomavirus infection (ko05165)	[UR]	Intracellular trafficking, secretion, and vesicular transport;; General function prediction only	Dynamin central region	Interferon-induced GTP-binding protein Mx1 OS=Sus scrofa OX=9823 GN=MX1 PE=2 SV=1	U	Intracellular trafficking, secretion, and vesicular transport	interferon-induced GTP-binding protein Mx1 [Sus scrofa]	biological process: cellular process (GO:0009987);; biological process: cellular component organization or biogenesis (GO:0071840);; molecular function: catalytic activity (GO:0003824);; molecular function: binding (GO:0005488);; cellular component: cell (GO:0005623);; cellular component: organelle (GO:0043226);; cellular component: cell part (GO:0044464);; cellular component: membrane (GO:001602…
ENSSSCG00000012118	TLR8	0.228492	70	0.194752	57	0.182908	57	0.250186	77	0.102692	34	0.066431	23	0.099467	33	0.06694	20	3.57918e-06	1.29238	up	--	--	Biological Process: MyD88-dependent toll-like receptor signaling pathway (GO:0002755);; Molecular Function: DNA binding (GO:0003677);; Molecular Function: RNA binding (GO:0003723);; Molecular Function: transmembrane signaling receptor activity (GO:0004888);; Biological Process: inflammatory response (GO:0006954);; Cellular Component: integral component of membrane (GO:0016021);; Biological Proces…	K10170|0.0e+00|ssc:397384|K10170 toll-like receptor 8 | (RefSeq) TLR8; toll-like receptor 8 precursor	Toll-like receptor signaling pathway (ko04620)	[T]	Signal transduction mechanisms	Leucine rich repeat	Toll-like receptor 9 OS=Felis catus OX=9685 GN=TLR9 PE=2 SV=1	T	Signal transduction mechanisms	toll-like receptor 8 isoform X3 [Sus scrofa]	biological process: immune system process (GO:0002376);; biological process: cellular process (GO:0009987);; biological process: signaling (GO:0023052);; biological process: single-organism process (GO:0044699);; biological process: response to stimulus (GO:0050896);; biological process: biological regulation (GO:0065007);; molecular function: binding (GO:0005488);; molecular function: signal tra…
ENSSSCG00000012138	ACE2	25.0387	3134	27.3661	3218	25.7382	3180	23.9242	2927	12.2614	1607	12.9646	1754	13.3436	1753	13.4859	1611	6.24365e-33	0.933649	up	[E]	Amino acid transport and metabolism	Molecular Function: virus receptor activity (GO:0001618);; Biological Process: angiotensin-mediated drinking behavior (GO:0003051);; Molecular Function: endopeptidase activity (GO:0004175);; Molecular Function: carboxypeptidase activity (GO:0004180);; Cellular Component: extracellular space (GO:0005615);; Cellular Component: cytoplasm (GO:0005737);; Cellular Component: plasma membrane (GO:0005886…	K09708|0.0e+00|ssc:100144303|K09708 angiotensin-converting enzyme 2 [EC:3.4.17.23] | (RefSeq) ACE2; angiotensin-converting enzyme 2 precursor	Renin-angiotensin system (ko04614);; Protein digestion and absorption (ko04974)	[E]	Amino acid transport and metabolism	Angiotensin-converting enzyme	Angiotensin-converting enzyme 2 OS=Bos taurus OX=9913 GN=ACE2 PE=2 SV=1	T	Signal transduction mechanisms	angiotensin-converting enzyme 2 isoform X1 [Sus scrofa]	molecular function: molecular transducer activity (GO:0060089);; biological process: behavior (GO:0007610);; molecular function: catalytic activity (GO:0003824);; biological process: metabolic process (GO:0008152);; cellular component: extracellular region (GO:0005576);; cellular component: extracellular region part (GO:0044421);; cellular component: cell (GO:0005623);; cellular component: cell p…
ENSSSCG00000012141	CA5B	3.0568	896	2.92727	806	2.07237	600	2.63404	755	1.48371	455	2.11824	673	0.379947	118	1.707	477	0.00842021	0.866617	up	[P]	Inorganic ion transport and metabolism	Molecular Function: carbonate dehydratase activity (GO:0004089);; Cellular Component: mitochondrion (GO:0005739);; Molecular Function: zinc ion binding (GO:0008270);; Cellular Component: integral component of membrane (GO:0016021);;	K01672|2.6e-162|ssc:100156418|K01672 carbonic anhydrase [EC:4.2.1.1] | (RefSeq) CA5B; carbonic anhydrase 5B, mitochondrial	Nitrogen metabolism (ko00910)	[R]	General function prediction only	Eukaryotic-type carbonic anhydrase	Carbonic anhydrase 1 OS=Ovis aries OX=9940 GN=CA1 PE=2 SV=2	P	Inorganic ion transport and metabolism	carbonic anhydrase 5B, mitochondrial [Sus scrofa]	molecular function: catalytic activity (GO:0003824);; cellular component: cell (GO:0005623);; cellular component: organelle (GO:0043226);; cellular component: cell part (GO:0044464);; molecular function: binding (GO:0005488);; cellular component: membrane (GO:0016020);; cellular component: membrane part (GO:0044425)
ENSSSCG00000012307	ENSSSCG00000012307	0.635738	217	0.53208	169	0.717516	239	0.36824	123	1.53496	542	0.964758	354	0.92853	330	0.472956	152	0.00466503	-0.819291	down	--	--	Biological Process: regulation of cyclin-dependent protein serine/threonine kinase activity (GO:0000079);; Biological Process: regulation of G2/M transition of mitotic cell cycle (GO:0010389);; Molecular Function: protein kinase binding (GO:0019901);; Cellular Component: host cell nucleus (GO:0042025);;	K21771|0.0e+00|ssc:100515638|K21771 G2/mitotic-specific cyclin-B3 | (RefSeq) CCNB3; G2/mitotic-specific cyclin-B3 isoform X2	FoxO signaling pathway (ko04068);; Cell cycle (ko04110);; Cellular senescence (ko04218);; Progesterone-mediated oocyte maturation (ko04914);; Human immunodeficiency virus 1 infection (ko05170)	[D]	Cell cycle control, cell division, chromosome partitioning	Cyclin, N-terminal domain	G2/mitotic-specific cyclin-B3 OS=Canis lupus familiaris OX=9615 GN=CCNB3 PE=2 SV=1	D	Cell cycle control, cell division, chromosome partitioning	cyclin B3 [Sus scrofa]	biological process: biological regulation (GO:0065007);; molecular function: binding (GO:0005488);; cellular component: other organism (GO:0044215);; cellular component: other organism part (GO:0044217)
ENSSSCG00000012363	HEPH	0.252565	71	0.308282	58	0.358859	79	0.429122	79	0.173806	51	0.128847	39	0.173058	51	0.264264	46	0.00767277	0.660508	up	[DPM]	Cell cycle control, cell division, chromosome partitioning;; Inorganic ion transport and metabolism;; Cell wall/membrane/envelope biogenesis	Molecular Function: ferroxidase activity (GO:0004322);; Molecular Function: copper ion binding (GO:0005507);; Biological Process: iron ion transport (GO:0006826);; Biological Process: cellular iron ion homeostasis (GO:0006879);; Molecular Function: ferrous iron binding (GO:0008198);; Cellular Component: integral component of membrane (GO:0016021);; Cellular Component: basolateral plasma membrane …	K14735|0.0e+00|ssc:100512938|K14735 hephaestin [EC:1.16.3.1] | (RefSeq) HEPH; hephaestin isoform X1	Porphyrin and chlorophyll metabolism (ko00860);; Mineral absorption (ko04978)	[Q]	Secondary metabolites biosynthesis, transport and catabolism	Multicopper oxidase	Ceruloplasmin OS=Ovis aries OX=9940 GN=CP PE=2 SV=1	Q	Secondary metabolites biosynthesis, transport and catabolism	hephaestin isoform X2 [Sus scrofa]	molecular function: catalytic activity (GO:0003824);; biological process: metabolic process (GO:0008152);; biological process: single-organism process (GO:0044699);; molecular function: binding (GO:0005488);; biological process: localization (GO:0051179);; biological process: cellular process (GO:0009987);; biological process: biological regulation (GO:0065007);; cellular component: membrane (GO:…
ENSSSCG00000012377	KIF4A	1.61868	305	1.42221	256	1.85212	344	1.21026	223	4.15433	818	2.55696	520	2.48373	491	1.00194	180	0.00850681	-0.76461	down	--	--	Molecular Function: microtubule motor activity (GO:0003777);; Molecular Function: ATP binding (GO:0005524);; Biological Process: microtubule-based movement (GO:0007018);; Molecular Function: microtubule binding (GO:0008017);;	K10395|0.0e+00|ssc:100152604|K10395 kinesin family member 4 | (RefSeq) KIF4A; chromosome-associated kinesin KIF4A isoform X1	--	[Z]	Cytoskeleton	Kinesin motor domain	Kinesin-like protein KIF3A OS=Macaca fascicularis OX=9541 GN=KIF3A PE=2 SV=1	Z	Cytoskeleton	chromosome-associated kinesin KIF4A isoform X1 [Sus scrofa]	molecular function: catalytic activity (GO:0003824);; molecular function: binding (GO:0005488);; biological process: cellular process (GO:0009987);; biological process: single-organism process (GO:0044699)
ENSSSCG00000012409	CITED1	1.81607	83	1.79359	77	2.75467	124	1.21912	55	0.894469	43	1.19533	59	0.508946	25	0.916798	40	0.000526007	1.06381	up	--	--	Biological Process: vasculogenesis (GO:0001570);; Molecular Function: chromatin binding (GO:0003682);; Molecular Function: transcription coactivator activity (GO:0003713);; Cellular Component: nucleoplasm (GO:0005654);; Cellular Component: cytosol (GO:0005829);; Biological Process: nucleocytoplasmic transport (GO:0006913);; Biological Process: transforming growth factor beta receptor signaling pa…	K22527|1.3e-115|eai:106835299|K22527 Cbp/p300-interacting transactivator 1 | (RefSeq) CITED1; Cbp/p300 interacting transactivator with Glu/Asp rich carboxy-terminal domain 1	--	--	--	CITED	Cbp/p300-interacting transactivator 1 OS=Bos taurus OX=9913 GN=CITED1 PE=2 SV=1	K	Transcription	cbp/p300-interacting transactivator 1 isoform X3 [Sus scrofa]	biological process: cellular process (GO:0009987);; biological process: developmental process (GO:0032502);; biological process: single-organism process (GO:0044699);; molecular function: binding (GO:0005488);; molecular function: transcription factor activity, protein binding (GO:0000988);; biological process: biological regulation (GO:0065007);; cellular component: cell (GO:0005623);; cellular …
ENSSSCG00000012584	CAPN6	1.42884	220	1.40883	204	1.7114	260	1.19479	180	0.983312	158	0.756987	126	0.875795	142	0.948846	139	0.000716943	0.654552	up	--	--	Biological Process: microtubule bundle formation (GO:0001578);; Cellular Component: cytoplasm (GO:0005737);; Cellular Component: spindle microtubule (GO:0005876);; Biological Process: proteolysis (GO:0006508);; Molecular Function: microtubule binding (GO:0008017);; Cellular Component: perinuclear region of cytoplasm (GO:0048471);; Biological Process: regulation of cytoskeleton organization (GO:00…	K08575|0.0e+00|ssc:100522971|K08575 calpain-6 [EC:3.4.22.-] | (RefSeq) CAPN6; calpain-6	--	[OT]	Posttranslational modification, protein turnover, chaperones;; Signal transduction mechanisms	Calpain family cysteine protease	Calpain-2 catalytic subunit OS=Macaca fascicularis OX=9541 GN=CAPN2 PE=2 SV=3	--	--	calpain-6 [Sus scrofa]	biological process: cellular process (GO:0009987);; biological process: cellular component organization or biogenesis (GO:0071840);; cellular component: cell (GO:0005623);; cellular component: cell part (GO:0044464);; cellular component: organelle (GO:0043226);; cellular component: organelle part (GO:0044422);; cellular component: supramolecular complex (GO:0099080);; biological process: metaboli…
ENSSSCG00000012597	PLS3	73.0397	10444	74.7976	9961	63.0442	8878	68.8587	9622	89.6103	13371	103.695	15963	105.961	15855	113.577	15459	1.82771e-12	-0.600157	down	--	--	Molecular Function: calcium ion binding (GO:0005509);; Molecular Function: actin filament binding (GO:0051015);; Biological Process: actin filament bundle assembly (GO:0051017);;	K17336|0.0e+00|ssc:100158187|K17336 plastin-3 | (RefSeq) PLS3; LOW QUALITY PROTEIN: plastin-3	--	[Z]	Cytoskeleton	Calponin homology (CH) domain	Plastin-3 OS=Bos taurus OX=9913 GN=PLS3 PE=2 SV=1	Z	Cytoskeleton	LOW QUALITY PROTEIN: plastin-3 [Sus scrofa]	molecular function: binding (GO:0005488);; biological process: cellular process (GO:0009987);; biological process: single-organism process (GO:0044699);; biological process: cellular component organization or biogenesis (GO:0071840)
ENSSSCG00000012607	TMEM255A	37.8038	5516	35.964	4856	36.7142	5300	37.0846	5242	44.8474	6817	57.6145	9067	58.6368	8860	60.6123	8420	2.55472e-11	-0.62464	down	--	--	Cellular Component: integral component of membrane (GO:0016021);;	--	--	--	--	FAM70 protein	Transmembrane protein 255A OS=Macaca fascicularis OX=9541 GN=TMEM255A PE=2 SV=1	S	Function unknown	transmembrane protein 255A isoform X1 [Sus scrofa]	cellular component: membrane (GO:0016020);; cellular component: membrane part (GO:0044425)
ENSSSCG00000012637	KLHL13	1.17283	175	1.07188	151	0.961144	143	1.26242	175	0.738621	117	0.610158	99	0.550425	85	0.635174	92	0.000191688	0.756979	up	[M]	Cell wall/membrane/envelope biogenesis	Cellular Component: ubiquitin ligase complex (GO:0000151);; Molecular Function: protein binding (GO:0005515);; Cellular Component: cellular_component (GO:0005575);; Cellular Component: intracellular (GO:0005622);; Cellular Component: cell (GO:0005623);; Cellular Component: cytoplasm (GO:0005737);; Cellular Component: cytosol (GO:0005829);; Biological Process: cellular protein modification process…	K10447|0.0e+00|umr:103677711|K10447 kelch-like protein 9/13 | (RefSeq) KLHL13; kelch like family member 13	Ubiquitin mediated proteolysis (ko04120)	[TR]	Signal transduction mechanisms;; General function prediction only	Kelch motif	Kelch-like protein 13 OS=Bos taurus OX=9913 GN=KLHL13 PE=2 SV=1	T	Signal transduction mechanisms	kelch-like protein 13 isoform X4 [Phocoena sinus]	cellular component: cell (GO:0005623);; cellular component: macromolecular complex (GO:0032991);; cellular component: cell part (GO:0044464);; molecular function: binding (GO:0005488);; biological process: metabolic process (GO:0008152);; biological process: cellular process (GO:0009987);; biological process: biological regulation (GO:0065007)
ENSSSCG00000012652	SASH3	0.802427	90	0.848173	89	0.661437	73	0.716213	78	0.14329	17	0.199757	25	0.405832	48	0.425674	46	3.41566e-05	1.30502	up	--	--	Biological Process: positive regulation of immunoglobulin production (GO:0002639);; Biological Process: positive regulation of T cell cytokine production (GO:0002726);; Biological Process: positive regulation of adaptive immune response (GO:0002821);; Cellular Component: nucleus (GO:0005634);; Cellular Component: cytoplasm (GO:0005737);; Biological Process: positive regulation of B cell prolifera…	--	--	[R]	General function prediction only	Lymphocyte signaling adaptor protein	SAM and SH3 domain-containing protein 3 OS=Bos taurus OX=9913 GN=SASH3 PE=2 SV=2	T	Signal transduction mechanisms	PREDICTED: SAM and SH3 domain-containing protein 3 isoform X1 [Rousettus aegyptiacus]	biological process: biological regulation (GO:0065007);; cellular component: cell (GO:0005623);; cellular component: organelle (GO:0043226);; cellular component: cell part (GO:0044464);; biological process: multicellular organismal process (GO:0032501);; biological process: single-organism process (GO:0044699)
ENSSSCG00000012680	GPC3	20.3956	2044	22.5001	2119	20.2962	2008	18.9921	1860	11.2939	1186	12.1599	1297	13.7537	1447	15.6471	1497	1.00375e-08	0.603021	up	--	--	Biological Process: regulation of signal transduction (GO:0009966);; Cellular Component: anchored component of plasma membrane (GO:0046658);;	K08109|0.0e+00|ssc:100516171|K08109 glypican 3 | (RefSeq) GPC3; glypican-3	Proteoglycans in cancer (ko05205)	[T]	Signal transduction mechanisms	Glypican	Glypican-3 OS=Pan troglodytes OX=9598 GN=GPC3 PE=2 SV=1	T	Signal transduction mechanisms	glypican-3 [Sus scrofa]	biological process: biological regulation (GO:0065007);; cellular component: cell (GO:0005623);; cellular component: membrane (GO:0016020);; cellular component: membrane part (GO:0044425);; cellular component: cell part (GO:0044464)
ENSSSCG00000012754	GABRE	2.16894	156	1.88853	128	2.07329	148	1.85217	131	1.13953	87	0.936466	73	1.16852	89	1.37111	95	0.000351849	0.747452	up	--	--	Molecular Function: GABA-A receptor activity (GO:0004890);; Molecular Function: inhibitory extracellular ligand-gated ion channel activity (GO:0005237);; Molecular Function: chloride channel activity (GO:0005254);; Cellular Component: integral component of plasma membrane (GO:0005887);; Biological Process: signal transduction (GO:0007165);; Biological Process: gamma-aminobutyric acid signaling pa…	K05185|4.3e-284|ssc:100516716|K05185 gamma-aminobutyric acid receptor subunit epsilon | (RefSeq) GABRE; gamma-aminobutyric acid receptor subunit epsilon isoform X1	Neuroactive ligand-receptor interaction (ko04080);; Retrograde endocannabinoid signaling (ko04723);; GABAergic synapse (ko04727);; Morphine addiction (ko05032);; Nicotine addiction (ko05033)	[T]	Signal transduction mechanisms	Neurotransmitter-gated ion-channel ligand binding domain	Gamma-aminobutyric acid receptor subunit gamma-2 OS=Bos taurus OX=9913 GN=GABRG2 PE=2 SV=1	T	Signal transduction mechanisms	gamma-aminobutyric acid receptor subunit epsilon isoform X1 [Sus scrofa]	molecular function: signal transducer activity (GO:0004871);; molecular function: molecular transducer activity (GO:0060089);; biological process: cellular process (GO:0009987);; biological process: signaling (GO:0023052);; biological process: single-organism process (GO:0044699);; biological process: response to stimulus (GO:0050896);; biological process: biological regulation (GO:0065007);; mol…
ENSSSCG00000012787	L1CAM	0.976598	216	1.29034	268	1.7728	387	1.41594	300	2.23121	507	1.89563	443	2.36093	548	2.17735	460	0.000146322	-0.692616	down	[X]	Mobilome: prophages, transposons	Cellular Component: integral component of membrane (GO:0016021);;	K06550|0.0e+00|ssc:100525324|K06550 L1 cell adhesion molecule | (RefSeq) L1CAM; LOW QUALITY PROTEIN: neural cell adhesion molecule L1	Axon guidance (ko04360);; Cell adhesion molecules (ko04514)	[T]	Signal transduction mechanisms	Immunoglobulin domain	--	T	Signal transduction mechanisms	LOW QUALITY PROTEIN: neural cell adhesion molecule L1 [Sus scrofa]	cellular component: membrane (GO:0016020);; cellular component: membrane part (GO:0044425)
ENSSSCG00000012790	ARHGAP4	1.08702	176	1.69792	258	0.944702	151	0.99831	158	0.231532	40	0.421947	74	0.232205	40	0.46507	72	8.91895e-10	1.75156	up	--	--	Cellular Component: cytoplasm (GO:0005737);; Biological Process: signal transduction (GO:0007165);;	K20122|0.0e+00|ssc:100523659|K20122 Rho GTPase-activating protein 4 | (RefSeq) ARHGAP4; LOW QUALITY PROTEIN: rho GTPase-activating protein 4	--	[Z]	Cytoskeleton	RhoGAP domain	--	T	Signal transduction mechanisms	LOW QUALITY PROTEIN: rho GTPase-activating protein 4 [Sus scrofa]	cellular component: cell (GO:0005623);; cellular component: cell part (GO:0044464);; biological process: cellular process (GO:0009987);; biological process: biological regulation (GO:0065007)
ENSSSCG00000012926	PC	107.38	16766	107.312	15743	116.614	17974	102.813	15690	57.4736	9397	54.7082	9235	56.7268	9298	74.4615	11095	1.90669e-16	0.797951	up	[C]	Energy production and conversion	Molecular Function: pyruvate carboxylase activity (GO:0004736);; Molecular Function: ATP binding (GO:0005524);; Cellular Component: cytoplasm (GO:0005737);; Cellular Component: mitochondrion (GO:0005739);; Biological Process: pyruvate metabolic process (GO:0006090);; Biological Process: gluconeogenesis (GO:0006094);; Molecular Function: biotin binding (GO:0009374);; Biological Process: negative r…	K01958|0.0e+00|ssc:397630|K01958 pyruvate carboxylase [EC:6.4.1.1] | (RefSeq) PC; pyruvate carboxylase, mitochondrial	Citrate cycle (TCA cycle) (ko00020);; Pyruvate metabolism (ko00620);; Carbon metabolism (ko01200);; Biosynthesis of amino acids (ko01230)	[C]	Energy production and conversion	Conserved carboxylase domain	Pyruvate carboxylase, mitochondrial OS=Bos taurus OX=9913 GN=PC PE=2 SV=2	C	Energy production and conversion	pyruvate carboxylase, mitochondrial [Sus scrofa]	molecular function: catalytic activity (GO:0003824);; molecular function: binding (GO:0005488);; cellular component: cell (GO:0005623);; cellular component: cell part (GO:0044464);; cellular component: organelle (GO:0043226);; biological process: metabolic process (GO:0008152);; biological process: cellular process (GO:0009987);; biological process: single-organism process (GO:0044699);; biologic…
ENSSSCG00000013004	TM7SF2	1.01046	70	1.36755	88	0.886585	60	0.922022	62	0.411945	30	0.575097	43	0.474686	35	0.580688	38	0.00021075	0.980143	up	[O]	Posttranslational modification, protein turnover, chaperones	Cellular Component: nuclear inner membrane (GO:0005637);; Biological Process: cholesterol biosynthetic process (GO:0006695);; Biological Process: sterol biosynthetic process (GO:0016126);; Molecular Function: oxidoreductase activity, acting on the CH-CH group of donors (GO:0016627);; Cellular Component: integral component of endoplasmic reticulum membrane (GO:0030176);; Cellular Component: recept…	K00222|7.1e-229|ssc:100514510|K00222 Delta14-sterol reductase [EC:1.3.1.70] | (RefSeq) TM7SF2; delta(14)-sterol reductase	Steroid biosynthesis (ko00100)	[IT]	Lipid transport and metabolism;; Signal transduction mechanisms	Ergosterol biosynthesis ERG4/ERG24 family	Delta(14)-sterol reductase TM7SF2 OS=Bos taurus OX=9913 GN=TM7SF2 PE=1 SV=1	--	--	delta(14)-sterol reductase [Sus scrofa]	cellular component: cell (GO:0005623);; cellular component: membrane (GO:0016020);; cellular component: organelle (GO:0043226);; cellular component: organelle part (GO:0044422);; cellular component: cell part (GO:0044464);; biological process: metabolic process (GO:0008152);; biological process: single-organism process (GO:0044699);; molecular function: catalytic activity (GO:0003824);; cellular …
ENSSSCG00000013008	CDCA5	0.575096	138	0.54803	124	0.577454	139	0.594258	143	1.16273	308	1.15034	314	0.774828	205	0.480072	106	0.00768207	-0.711349	down	--	--	--	K17390|1.5e-128|ssc:100519128|K17390 sororin | (RefSeq) CDCA5; sororin	MicroRNAs in cancer (ko05206)	--	--	Sororin protein	--	S	Function unknown	sororin [Sus scrofa]	--
ENSSSCG00000013020	MAP4K2	4.59755	604	3.67466	453	4.46479	579	4.19997	539	1.74339	240	2.20363	313	2.29894	317	3.02994	380	1.65708e-06	0.83072	up	[T]	Signal transduction mechanisms	Molecular Function: ATP binding (GO:0005524);; Biological Process: vesicle targeting (GO:0006903);; Biological Process: activation of JUN kinase activity (GO:0007257);; Molecular Function: MAP kinase kinase kinase kinase activity (GO:0008349);; Molecular Function: mitogen-activated protein kinase kinase kinase binding (GO:0031435);;	K04414|0.0e+00|ssc:100523716|K04414 mitogen-activated protein kinase kinase kinase kinase 2 [EC:2.7.11.1] | (RefSeq) MAP4K2; mitogen-activated protein kinase kinase kinase kinase 2 isoform X2	MAPK signaling pathway (ko04010)	[T]	Signal transduction mechanisms	Protein kinase domain	Serine/threonine-protein kinase 25 OS=Bos taurus OX=9913 GN=STK25 PE=2 SV=1	T	Signal transduction mechanisms	mitogen-activated protein kinase kinase kinase kinase 2 isoform X2 [Sus scrofa]	molecular function: binding (GO:0005488);; biological process: cellular process (GO:0009987);; biological process: single-organism process (GO:0044699);; biological process: biological regulation (GO:0065007);; molecular function: catalytic activity (GO:0003824);; molecular function: signal transducer activity (GO:0004871);; biological process: metabolic process (GO:0008152);; biological process:…
ENSSSCG00000013041	FERMT3	2.70478	475	3.23274	574	1.65951	312	2.12749	354	1.00776	232	1.27795	275	1.09045	226	1.58773	309	0.000303072	0.753009	up	--	--	Biological Process: integrin-mediated signaling pathway (GO:0007229);;	K17084|0.0e+00|ssc:100525326|K17084 kindlin 3 | (RefSeq) FERMT3; fermitin family homolog 3	Platelet activation (ko04611)	[D]	Cell cycle control, cell division, chromosome partitioning	FERM central domain	Fermitin family homolog 3 OS=Bos taurus OX=9913 GN=FERMT3 PE=2 SV=1	T	Signal transduction mechanisms	fermitin family homolog 3 [Sus scrofa]	biological process: cellular process (GO:0009987);; biological process: signaling (GO:0023052);; biological process: single-organism process (GO:0044699);; biological process: response to stimulus (GO:0050896);; biological process: biological regulation (GO:0065007)
ENSSSCG00000013056	LGALS12	6.94941	434	8.73968	510	9.23955	551	7.44342	456	3.05753	195	3.30138	223	2.81686	188	4.35946	260	7.68765e-12	1.20921	up	--	--	Cellular Component: nucleus (GO:0005634);; Cellular Component: cytoplasm (GO:0005737);; Cellular Component: mitochondrion (GO:0005739);; Molecular Function: lactose binding (GO:0030395);; Biological Process: regulation of fat cell differentiation (GO:0045598);; Biological Process: regulation of lipid catabolic process (GO:0050994);; Biological Process: intrinsic apoptotic signaling pathway (GO:00…	K10095|3.5e-173|ssc:100217395|K10095 galectin-12 | (RefSeq) LGALS12; galectin-12	--	[W]	Extracellular structures	Galactoside-binding lectin	--	W	Extracellular structures	galectin-12 [Sus scrofa]	cellular component: cell (GO:0005623);; cellular component: organelle (GO:0043226);; cellular component: cell part (GO:0044464);; molecular function: binding (GO:0005488);; biological process: biological regulation (GO:0065007);; biological process: cellular process (GO:0009987);; biological process: signaling (GO:0023052);; biological process: single-organism process (GO:0044699);; biological pr…
ENSSSCG00000013100	ENSSSCG00000013100	2.09442	215	2.36695	231	1.69259	170	1.96791	203	0.355093	40	0.892976	103	0.435933	50	0.547885	53	7.13119e-11	1.78216	up	--	--	Cellular Component: integral component of membrane (GO:0016021);;	K22191|9.6e-128|ssc:100524972|K22191 membrane-spanning 4-domains subfamily A member 5/6/7 | (RefSeq) membrane-spanning 4-domains subfamily A member 6A isoform X1	--	--	--	CD20-like family	--	S	Function unknown	membrane-spanning 4-domains subfamily A member 6A isoform X1 [Sus scrofa]	cellular component: membrane (GO:0016020);; cellular component: membrane part (GO:0044425)
ENSSSCG00000013106	PTGDR2	0.49507	130	0.48106	83	0.479266	186	0.525973	202	0.130809	48	0.164171	70	0.120164	33	0.18543	70	3.94525e-06	1.47988	up	--	--	Molecular Function: G-protein coupled receptor activity (GO:0004930);; Cellular Component: integral component of membrane (GO:0016021);;	K06715|7.3e-213|ssc:100510947|K06715 prostaglandin D2 receptor 2 | (RefSeq) PTGDR2; prostaglandin D2 receptor 2	--	--	--	7 transmembrane receptor (rhodopsin family)	N-formyl peptide receptor 2 (Fragment) OS=Pongo pygmaeus OX=9600 GN=FPR2 PE=3 SV=1	T	Signal transduction mechanisms	prostaglandin D2 receptor 2 [Sus scrofa]	molecular function: signal transducer activity (GO:0004871);; molecular function: molecular transducer activity (GO:0060089);; biological process: cellular process (GO:0009987);; biological process: signaling (GO:0023052);; biological process: single-organism process (GO:0044699);; biological process: response to stimulus (GO:0050896);; biological process: biological regulation (GO:0065007);; cel…
ENSSSCG00000013114	SLC15A3	6.25098	616	7.79085	722	5.40586	526	6.42371	619	2.82715	292	2.88513	308	3.48048	360	3.09141	291	1.93147e-12	1.0345	up	[E]	Amino acid transport and metabolism	Cellular Component: lysosomal membrane (GO:0005765);; Molecular Function: peptide:proton symporter activity (GO:0015333);; Cellular Component: integral component of membrane (GO:0016021);; Molecular Function: oligopeptide transmembrane transporter activity (GO:0035673);; Molecular Function: peptide transmembrane transporter activity (GO:1904680);;	K14638|0.0e+00|ssc:100513135|K14638 solute carrier family 15 (peptide/histidine transporter), member 3/4 | (RefSeq) SLC15A3; solute carrier family 15 member 3	--	[E]	Amino acid transport and metabolism	POT family	Solute carrier family 15 member 4 OS=Bos taurus OX=9913 GN=SLC15A4 PE=2 SV=2	E	Amino acid transport and metabolism	solute carrier family 15 member 3 [Sus scrofa]	cellular component: cell (GO:0005623);; cellular component: membrane (GO:0016020);; cellular component: organelle (GO:0043226);; cellular component: organelle part (GO:0044422);; cellular component: cell part (GO:0044464);; molecular function: transporter activity (GO:0005215);; biological process: single-organism process (GO:0044699);; biological process: localization (GO:0051179);; cellular com…
ENSSSCG00000013237	SPI1	5.84283	370	5.85858	351	5.8153	366	5.09366	317	2.0886	140	2.05863	142	2.89437	194	2.59088	158	2.79162e-11	1.18719	up	--	--	Molecular Function: RNA polymerase II transcription factor activity, sequence-specific DNA binding (GO:0000981);; Cellular Component: nucleus (GO:0005634);; Biological Process: regulation of transcription from RNA polymerase II promoter (GO:0006357);; Biological Process: cell differentiation (GO:0030154);; Molecular Function: sequence-specific DNA binding (GO:0043565);;	K09438|3.3e-153|aml:100476314|K09438 transcription factor PU.1 | (RefSeq) SPI1; transcription factor PU.1 isoform X3	Osteoclast differentiation (ko04380);; Human T-cell leukemia virus 1 infection (ko05166);; Pathways in cancer (ko05200);; Transcriptional misregulation in cancer (ko05202);; Acute myeloid leukemia (ko05221)	[K]	Transcription	Ets-domain	Transcription factor PU.1 OS=Sus scrofa OX=9823 GN=SPI1 PE=2 SV=1	K	Transcription	transcription factor PU.1 isoform X1 [Sus scrofa]	molecular function: nucleic acid binding transcription factor activity (GO:0001071);; biological process: biological regulation (GO:0065007);; cellular component: cell (GO:0005623);; cellular component: organelle (GO:0043226);; cellular component: cell part (GO:0044464);; biological process: cellular process (GO:0009987);; biological process: developmental process (GO:0032502);; biological proces…
ENSSSCG00000013276	PRDM11	3.19347	515	3.45413	513	3.41346	532	3.04987	471	1.94089	319	1.5775	268	2.30533	379	2.59071	386	0.000108631	0.622987	up	--	--	Molecular Function: molecular_function (GO:0003674);; Molecular Function: chromatin binding (GO:0003682);; Molecular Function: binding (GO:0005488);;	K18709|8.4e-44|spu:105437981|K18709 speckle targeted PIP5K1A-regulated poly(A) polymerase [EC:2.7.7.19 2.7.7.52] | (RefSeq) uncharacterized protein LOC105437981	--	--	--	SET domain	--	K	Transcription	PR domain-containing protein 11 isoform X2 [Sus scrofa]	molecular function: binding (GO:0005488)
ENSSSCG00000013292	PRR5L	10.7685	1139	9.3726	931	10.5715	1102	8.93732	920	6.05866	671	5.23827	600	5.73963	633	7.03809	699	5.10835e-09	0.689829	up	--	--	Biological Process: negative regulation of protein phosphorylation (GO:0001933);; Biological Process: positive regulation of protein phosphorylation (GO:0001934);; Biological Process: regulation of fibroblast migration (GO:0010762);; Biological Process: positive regulation of phosphatidylinositol 3-kinase signaling (GO:0014068);; Molecular Function: ubiquitin protein ligase binding (GO:0031625);;…	K20411|7.6e-60|xtr:493393|K20411 proline-rich protein 5 | (RefSeq) prr5; proline-rich protein 5	mTOR signaling pathway (ko04150)	--	--	HbrB-like	Proline-rich protein 5-like OS=Bos taurus OX=9913 GN=PRR5L PE=2 SV=1	T	Signal transduction mechanisms	proline-rich protein 5-like isoform X4 [Sus scrofa]	biological process: biological regulation (GO:0065007);; molecular function: binding (GO:0005488);; cellular component: cell (GO:0005623);; cellular component: macromolecular complex (GO:0032991);; cellular component: cell part (GO:0044464);; biological process: cellular process (GO:0009987);; biological process: response to stimulus (GO:0050896);; biological process: signaling (GO:0023052);; bio…
ENSSSCG00000013388	PDE3B	8.2152	2091	7.95285	1902	9.15277	2300	8.24346	2051	4.2168	1124	4.2	1156	4.45036	1189	4.83038	1174	3.00934e-22	0.887595	up	--	--	Molecular Function: 3',5'-cyclic-nucleotide phosphodiesterase activity (GO:0004114);; Biological Process: signal transduction (GO:0007165);; Cellular Component: integral component of membrane (GO:0016021);; Molecular Function: metal ion binding (GO:0046872);;	K13296|0.0e+00|ssc:100516060|K13296 cGMP-inhibited 3',5'-cyclic phosphodiesterase B [EC:3.1.4.17] | (RefSeq) PDE3B; LOW QUALITY PROTEIN: cGMP-inhibited 3',5'-cyclic phosphodiesterase B	Purine metabolism (ko00230);; cGMP-PKG signaling pathway (ko04022);; cAMP signaling pathway (ko04024);; Apelin signaling pathway (ko04371);; Insulin signaling pathway (ko04910);; Progesterone-mediated oocyte maturation (ko04914);; Glucagon signaling pathway (ko04922);; Regulation of lipolysis in adipocytes (ko04923);; Renin secretion (ko04924);; Morphine addiction (ko05032)	--	--	3'5'-cyclic nucleotide phosphodiesterase	Calcium/calmodulin-dependent 3',5'-cyclic nucleotide phosphodiesterase 1A OS=Bos taurus OX=9913 GN=PDE1A PE=1 SV=3	T	Signal transduction mechanisms	LOW QUALITY PROTEIN: cGMP-inhibited 3',5'-cyclic phosphodiesterase B [Sus scrofa]	molecular function: catalytic activity (GO:0003824);; biological process: cellular process (GO:0009987);; biological process: biological regulation (GO:0065007);; cellular component: membrane (GO:0016020);; cellular component: membrane part (GO:0044425);; molecular function: binding (GO:0005488)
ENSSSCG00000013400	MICAL2	24.3506	6559	23.3114	5818	24.8625	6561	27.4006	7182	34.8655	9824	38.2396	11137	35.9135	10168	39.5076	10121	8.9124e-14	-0.615311	down	--	--	Molecular Function: actin binding (GO:0003779);; Cellular Component: nucleus (GO:0005634);; Biological Process: positive regulation of transcription via serum response element binding (GO:0010735);; Biological Process: actin filament depolymerization (GO:0030042);; Molecular Function: NADPH:sulfur oxidoreductase activity (GO:0043914);; Molecular Function: metal ion binding (GO:0046872);; Molecula…	K19947|0.0e+00|pale:102889705|K19947 F-actin monooxygenase [EC:1.14.13.225] | (RefSeq) MICAL2; F-actin-monooxygenase MICAL2	--	[TZ]	Signal transduction mechanisms;; Cytoskeleton	Calponin homology (CH) domain	[F-actin]-monooxygenase MICAL2 OS=Bos taurus OX=9913 GN=MICAL2 PE=3 SV=2	Z	Cytoskeleton	F-actin-monooxygenase MICAL2 isoform X7 [Phocoena sinus]	molecular function: binding (GO:0005488);; cellular component: cell (GO:0005623);; cellular component: organelle (GO:0043226);; cellular component: cell part (GO:0044464);; biological process: biological regulation (GO:0065007);; biological process: cellular process (GO:0009987);; biological process: single-organism process (GO:0044699);; biological process: cellular component organization or bio…
ENSSSCG00000013418	CFD	140.806	6837	167.027	7620	170.303	8163	136.285	6468	55.5726	2826	48.8085	2562	50.7851	2589	51.9864	2409	5.53972e-70	1.53215	up	[O]	Posttranslational modification, protein turnover, chaperones	Molecular Function: serine-type endopeptidase activity (GO:0004252);; Cellular Component: extracellular space (GO:0005615);; Biological Process: complement activation, alternative pathway (GO:0006957);; Biological Process: Notch signaling pathway (GO:0007219);; Biological Process: response to bacterium (GO:0009617);;	K01334|1.5e-147|ssc:396877|K01334 complement factor D [EC:3.4.21.46] | (RefSeq) CFD; complement factor D	Complement and coagulation cascades (ko04610);; Staphylococcus aureus infection (ko05150)	[E]	Amino acid transport and metabolism	Trypsin	Complement factor D OS=Sus scrofa OX=9823 GN=CFD PE=2 SV=1	O	Posttranslational modification, protein turnover, chaperones	complement factor D [Sus scrofa]	molecular function: catalytic activity (GO:0003824);; biological process: metabolic process (GO:0008152);; cellular component: extracellular region (GO:0005576);; cellular component: extracellular region part (GO:0044421);; biological process: immune system process (GO:0002376);; biological process: response to stimulus (GO:0050896);; biological process: biological regulation (GO:0065007);; biolo…
ENSSSCG00000013440	ATP8B3	0.250569	53	0.349769	69	0.368543	76	0.358132	73	0.15678	35	0.245036	55	0.171374	38	0.124103	25	0.00143128	0.880363	up	[P]	Inorganic ion transport and metabolism	Molecular Function: magnesium ion binding (GO:0000287);; Cellular Component: acrosomal vesicle (GO:0001669);; Molecular Function: ATP binding (GO:0005524);; Cellular Component: Golgi apparatus (GO:0005794);; Cellular Component: plasma membrane (GO:0005886);; Biological Process: Golgi organization (GO:0007030);; Biological Process: binding of sperm to zona pellucida (GO:0007339);; Cellular Compone…	K01530|0.0e+00|ssc:100513137|K01530 phospholipid-translocating ATPase [EC:7.6.2.1] | (RefSeq) ATP8B3; phospholipid-transporting ATPase IK isoform X1	--	[R]	General function prediction only	Phospholipid-translocating P-type ATPase C-terminal	Phospholipid-transporting ATPase IB OS=Bos taurus OX=9913 GN=ATP8A2 PE=1 SV=4	P	Inorganic ion transport and metabolism	phospholipid-transporting ATPase IK isoform X3 [Sus scrofa]	molecular function: binding (GO:0005488);; cellular component: cell (GO:0005623);; cellular component: organelle (GO:0043226);; cellular component: cell part (GO:0044464);; cellular component: membrane (GO:0016020);; biological process: cellular process (GO:0009987);; biological process: cellular component organization or biogenesis (GO:0071840);; biological process: reproduction (GO:0000003);; b…
ENSSSCG00000013512	PLIN4	40.8318	11639	41.8692	11378	40.1814	11535	40.5449	11390	22.7266	6762	24.8393	7632	24.2874	7405	28.5861	7926	9.97434e-16	0.667699	up	--	--	--	K20254|1.1e-128|ssc:100524667|K20254 perilipin-4 | (RefSeq) PLIN4; perilipin-4 isoform X1	PPAR signaling pathway (ko03320)	--	--	Perilipin family	--	S	Function unknown	perilipin-4 isoform X3 [Sus scrofa]	--
ENSSSCG00000013545	TUBB4A	0.376765	101	0.457276	115	0.311738	83	0.229682	60	0.084256	24	0.104675	31	0.115817	33	0.11274	29	2.61283e-09	1.6541	up	--	--	Biological Process: microtubule cytoskeleton organization (GO:0000226);; Biological Process: mitotic cell cycle (GO:0000278);; Molecular Function: GTPase activity (GO:0003924);; Molecular Function: structural constituent of cytoskeleton (GO:0005200);; Molecular Function: calcium ion binding (GO:0005509);; Molecular Function: GTP binding (GO:0005525);; Cellular Component: cytoplasm (GO:0005737);; …	K07375|4.3e-259|aju:106975433|K07375 tubulin beta | (RefSeq) TUBB4A; tubulin beta-4A chain	Phagosome (ko04145);; Gap junction (ko04540);; Alzheimer disease (ko05010);; Parkinson disease (ko05012);; Amyotrophic lateral sclerosis (ko05014);; Huntington disease (ko05016);; Prion disease (ko05020)	[Z]	Cytoskeleton	Tubulin/FtsZ family, GTPase domain	Tubulin beta-4A chain OS=Bos taurus OX=9913 GN=TUBB4A PE=2 SV=1	Z	Cytoskeleton	tubulin beta-4A chain [Bos taurus]	biological process: cellular process (GO:0009987);; biological process: cellular component organization or biogenesis (GO:0071840);; biological process: single-organism process (GO:0044699);; molecular function: catalytic activity (GO:0003824);; molecular function: structural molecule activity (GO:0005198);; molecular function: binding (GO:0005488);; cellular component: cell (GO:0005623);; cellul…
ENSSSCG00000013553	VAV1	1.46573	233	1.93535	289	0.999902	157	1.32771	206	0.458248	77	0.468645	81	0.634968	106	0.363644	55	7.98877e-10	1.52323	up	--	--	Molecular Function: phosphotyrosine residue binding (GO:0001784);; Cellular Component: cell-cell junction (GO:0005911);; Biological Process: phagocytosis (GO:0006909);; Biological Process: immune response (GO:0006955);; Biological Process: G-protein coupled receptor signaling pathway (GO:0007186);; Biological Process: integrin-mediated signaling pathway (GO:0007229);; Biological Process: small GT…	K05730|0.0e+00|ssc:100519821|K05730 guanine nucleotide exchange factor VAV | (RefSeq) VAV1; proto-oncogene vav	Rap1 signaling pathway (ko04015);; cAMP signaling pathway (ko04024);; Chemokine signaling pathway (ko04062);; Focal adhesion (ko04510);; Natural killer cell mediated cytotoxicity (ko04650);; T cell receptor signaling pathway (ko04660);; B cell receptor signaling pathway (ko04662);; Fc epsilon RI signaling pathway (ko04664);; Fc gamma R-mediated phagocytosis (ko04666);; Leukocyte transendothelial …	[T]	Signal transduction mechanisms	RhoGEF domain	Proto-oncogene vav OS=Bos taurus OX=9913 GN=VAV1 PE=2 SV=1	T	Signal transduction mechanisms	proto-oncogene vav [Sus scrofa]	molecular function: binding (GO:0005488);; cellular component: cell junction (GO:0030054);; biological process: single-organism process (GO:0044699);; biological process: localization (GO:0051179);; biological process: immune system process (GO:0002376);; biological process: response to stimulus (GO:0050896);; biological process: cellular process (GO:0009987);; biological process: signaling (GO:0…
ENSSSCG00000013556	ENSSSCG00000013556	3.13473	589	3.97674	564	1.67911	334	2.9436	456	0.42398	95	0.94889	155	0.840748	185	0.944684	189	3.42504e-12	1.66823	up	--	--	Molecular Function: G-protein coupled receptor activity (GO:0004930);; Molecular Function: calcium ion binding (GO:0005509);; Biological Process: cell surface receptor signaling pathway (GO:0007166);; Cellular Component: integral component of membrane (GO:0016021);;	K04591|0.0e+00|ssc:100521889|K04591 adhesion G protein-coupled receptor E1 | (RefSeq) ADGRE1; adhesion G protein-coupled receptor E1 isoform X1	--	[T]	Signal transduction mechanisms	Calcium-binding EGF domain	Adhesion G protein-coupled receptor E2 OS=Macaca mulatta OX=9544 GN=ADGRE2 PE=2 SV=1	T	Signal transduction mechanisms	adhesion G protein-coupled receptor E1 isoform X23 [Sus scrofa]	molecular function: signal transducer activity (GO:0004871);; molecular function: molecular transducer activity (GO:0060089);; biological process: cellular process (GO:0009987);; biological process: signaling (GO:0023052);; biological process: single-organism process (GO:0044699);; biological process: response to stimulus (GO:0050896);; biological process: biological regulation (GO:0065007);; mol…
ENSSSCG00000013576	STXBP2	11.7384	1050	12.4848	1047	12.1756	1075	12.1771	1037	7.63917	716	6.04003	586	8.68533	816	7.17329	613	1.02938e-08	0.66988	up	--	--	Biological Process: leukocyte mediated cytotoxicity (GO:0001909);; Cellular Component: cytosol (GO:0005829);; Cellular Component: plasma membrane (GO:0005886);; Biological Process: intracellular protein transport (GO:0006886);; Biological Process: vesicle docking involved in exocytosis (GO:0006904);; Biological Process: neurotransmitter secretion (GO:0007269);; Biological Process: vesicle-mediate…	K15300|0.0e+00|ssc:100525152|K15300 syntaxin-binding protein 2 | (RefSeq) STXBP2; syntaxin-binding protein 2 isoform X2	--	[U]	Intracellular trafficking, secretion, and vesicular transport	Sec1 family	Syntaxin-binding protein 2 OS=Canis lupus familiaris OX=9615 GN=STXBP2 PE=2 SV=1	U	Intracellular trafficking, secretion, and vesicular transport	syntaxin-binding protein 2 isoform X1 [Sus scrofa]	biological process: cell killing (GO:0001906);; cellular component: cell (GO:0005623);; cellular component: cell part (GO:0044464);; cellular component: membrane (GO:0016020);; biological process: localization (GO:0051179);; biological process: cellular process (GO:0009987);; biological process: single-organism process (GO:0044699);; biological process: signaling (GO:0023052);; biological process…
ENSSSCG00000013579	CD209	28.1501	1377	31.8558	1464	26.1768	1264	26.6712	1275	7.95455	408	12.2414	648	10.3735	533	12.2656	573	2.77441e-23	1.35546	up	[M]	Cell wall/membrane/envelope biogenesis	Cellular Component: integral component of membrane (GO:0016021);; Molecular Function: carbohydrate binding (GO:0030246);;	K06563|6.8e-142|ssc:100170134|K06563 C-type lectin domain family 4 member M | (RefSeq) CD209; CD209 antigen	Phagosome (ko04145);; C-type lectin receptor signaling pathway (ko04625);; Tuberculosis (ko05152);; Measles (ko05162)	[TV]	Signal transduction mechanisms;; Defense mechanisms	Lectin C-type domain	CD209 antigen-like protein 2 OS=Macaca mulatta OX=9544 GN=CD209L2 PE=1 SV=1	--	--	CD209 antigen [Sus scrofa]	cellular component: membrane (GO:0016020);; cellular component: membrane part (GO:0044425);; molecular function: binding (GO:0005488)
ENSSSCG00000013604	MYO1F	1.94507	332	2.32601	373	1.71093	288	2.07699	347	0.711998	128	0.593973	110	0.796545	143	0.970482	158	4.31341e-12	1.35072	up	--	--	Molecular Function: microfilament motor activity (GO:0000146);; Molecular Function: ATP binding (GO:0005524);; Cellular Component: cytoplasm (GO:0005737);; Biological Process: actin filament organization (GO:0007015);; Cellular Component: actin cytoskeleton (GO:0015629);; Cellular Component: myosin complex (GO:0016459);; Biological Process: vesicle transport along actin filament (GO:0030050);; Mo…	K10356|0.0e+00|ssc:100517998|K10356 myosin I | (RefSeq) MYO1F; unconventional myosin-If	--	[Z]	Cytoskeleton	Myosin head (motor domain)	Unconventional myosin-Ic OS=Bos taurus OX=9913 GN=MYO1C PE=1 SV=3	Z	Cytoskeleton	unconventional myosin-If [Sus scrofa]	molecular function: catalytic activity (GO:0003824);; molecular function: binding (GO:0005488);; cellular component: cell (GO:0005623);; cellular component: cell part (GO:0044464);; biological process: cellular process (GO:0009987);; biological process: single-organism process (GO:0044699);; biological process: cellular component organization or biogenesis (GO:0071840);; cellular component: organ…
ENSSSCG00000013632	C19orf38	1.78691	99	1.94041	101	1.53977	85	1.43657	78	0.985869	58	0.669475	41	1.35068	79	0.730512	39	0.00232971	0.78952	up	--	--	Cellular Component: integral component of membrane (GO:0016021);;	K09228|2.9e-09|sbq:101040404|K09228 KRAB domain-containing zinc finger protein | (RefSeq) uncharacterized protein LOC101040404	Herpes simplex virus 1 infection (ko05168)	--	--	Ig domain in C19orf38 (HIDE1)	--	S	Function unknown	protein HIDE1 [Sus scrofa]	cellular component: membrane (GO:0016020);; cellular component: membrane part (GO:0044425)
ENSSSCG00000013778	NDUFB7	6.37122	156	6.82174	157	3.59208	87	5.58152	134	9.14221	234	8.51941	225	8.52912	219	8.35392	195	0.00166507	-0.663418	down	--	--	Cellular Component: mitochondrial respiratory chain complex I (GO:0005747);; Cellular Component: mitochondrial intermembrane space (GO:0005758);; Molecular Function: NADH dehydrogenase (ubiquinone) activity (GO:0008137);; Biological Process: mitochondrial respiratory chain complex I assembly (GO:0032981);;	K03963|1.0e-73|ssc:100737726|K03963 NADH dehydrogenase (ubiquinone) 1 beta subcomplex subunit 7 | (RefSeq) NDUFB7; NADH dehydrogenase [ubiquinone] 1 beta subcomplex subunit 7	Oxidative phosphorylation (ko00190);; Thermogenesis (ko04714);; Retrograde endocannabinoid signaling (ko04723);; Non-alcoholic fatty liver disease (ko04932);; Alzheimer disease (ko05010);; Parkinson disease (ko05012);; Amyotrophic lateral sclerosis (ko05014);; Huntington disease (ko05016);; Prion disease (ko05020)	[C]	Energy production and conversion	NADH-ubiquinone oxidoreductase B18 subunit (NDUFB7)	NADH dehydrogenase [ubiquinone] 1 beta subcomplex subunit 7 OS=Bos taurus OX=9913 GN=NDUFB7 PE=1 SV=2	C	Energy production and conversion	NADH dehydrogenase [ubiquinone] 1 beta subcomplex subunit 7 [Sus scrofa]	cellular component: cell (GO:0005623);; cellular component: membrane (GO:0016020);; cellular component: macromolecular complex (GO:0032991);; cellular component: organelle (GO:0043226);; cellular component: organelle part (GO:0044422);; cellular component: membrane part (GO:0044425);; cellular component: cell part (GO:0044464);; cellular component: membrane-enclosed lumen (GO:0031974);; molecular…
ENSSSCG00000013839	RASAL3	0.67026	99	0.65782	91	0.604316	88	0.508825	74	0.240451	38	0.252798	41	0.338469	53	0.279629	40	7.22256e-06	1.07333	up	--	--	Biological Process: signal transduction (GO:0007165);; Biological Process: regulation of GTPase activity (GO:0043087);;	K17634|0.0e+00|ssc:100524424|K17634 RAS protein activator-like 3 | (RefSeq) RASAL3; RAS protein activator like-3 isoform X1	Ras signaling pathway (ko04014)	[R]	General function prediction only	GTPase-activator protein for Ras-like GTPase	RAS protein activator like-3 OS=Bos taurus OX=9913 GN=RASAL3 PE=2 SV=1	T	Signal transduction mechanisms	RAS protein activator like-3 isoform X1 [Sus scrofa]	biological process: cellular process (GO:0009987);; biological process: biological regulation (GO:0065007)
ENSSSCG00000013879	SLC27A1	3.27111	669	3.48869	649	3.63545	730	4.35553	844	1.85327	395	1.75091	377	1.9256	402	2.65508	498	1.242e-07	0.827898	up	[IQ]	Lipid transport and metabolism;; Secondary metabolites biosynthesis, transport and catabolism	Molecular Function: long-chain fatty acid-CoA ligase activity (GO:0004467);; Molecular Function: fatty acid transporter activity (GO:0015245);; Cellular Component: integral component of membrane (GO:0016021);; Molecular Function: very long-chain fatty acid-CoA ligase activity (GO:0031957);;	K08745|9.9e-265|ssc:100037269|K08745 solute carrier family 27 (fatty acid transporter), member 1/4 [EC:6.2.1.-] | (RefSeq) SLC27A1; long-chain fatty acid transport protein 1 precursor	PPAR signaling pathway (ko03320);; Insulin resistance (ko04931);; Fat digestion and absorption (ko04975)	[I]	Lipid transport and metabolism	AMP-binding enzyme	Long-chain fatty acid transport protein 1 OS=Bos taurus OX=9913 GN=SLC27A1 PE=2 SV=1	I	Lipid transport and metabolism	fatty acid transport protein 1aV [Sus scrofa]	molecular function: catalytic activity (GO:0003824);; molecular function: transporter activity (GO:0005215);; biological process: single-organism process (GO:0044699);; biological process: localization (GO:0051179);; cellular component: membrane (GO:0016020);; cellular component: membrane part (GO:0044425)
ENSSSCG00000013886	B3GNT3	0.75801	95	0.997118	118	0.621073	77	0.61287	75	0.465697	62	0.414847	57	0.376883	50	0.168258	21	0.000531581	1.00113	up	--	--	Cellular Component: Golgi membrane (GO:0000139);; Cellular Component: endoplasmic reticulum (GO:0005783);; Cellular Component: Golgi apparatus (GO:0005794);; Biological Process: protein glycosylation (GO:0006486);; Biological Process: protein O-linked glycosylation (GO:0006493);; Molecular Function: acetylglucosaminyltransferase activity (GO:0008375);; Molecular Function: acetylgalactosaminyltran…	K07970|4.5e-225|ssc:100518473|K07970 beta-1,3-N-acetylglucosaminyltransferase 3 [EC:2.4.1.146 2.4.1.149] | (RefSeq) B3GNT3; N-acetyllactosaminide beta-1,3-N-acetylglucosaminyltransferase 3	Glycosphingolipid biosynthesis - lacto and neolacto series (ko00601)	[G]	Carbohydrate transport and metabolism	Galactosyltransferase	UDP-GlcNAc:betaGal beta-1,3-N-acetylglucosaminyltransferase 9 OS=Bos taurus OX=9913 GN=B3GNT9 PE=2 SV=1	G	Carbohydrate transport and metabolism	N-acetyllactosaminide beta-1,3-N-acetylglucosaminyltransferase 3 [Sus scrofa]	cellular component: cell (GO:0005623);; cellular component: membrane (GO:0016020);; cellular component: organelle (GO:0043226);; cellular component: organelle part (GO:0044422);; cellular component: cell part (GO:0044464);; biological process: metabolic process (GO:0008152);; biological process: cellular process (GO:0009987);; biological process: single-organism process (GO:0044699);; molecular f…
ENSSSCG00000013931	GMIP	2.69342	443	4.43179	684	3.07213	498	1.15214	185	1.04624	180	1.38938	247	1.95458	337	1.81354	285	0.00609691	0.822323	up	--	--	Molecular Function: GTPase activator activity (GO:0005096);; Cellular Component: nucleoplasm (GO:0005654);; Cellular Component: cytosol (GO:0005829);; Cellular Component: plasma membrane (GO:0005886);; Biological Process: negative regulation of GTPase activity (GO:0034260);; Biological Process: intracellular signal transduction (GO:0035556);; Molecular Function: metal ion binding (GO:0046872);; B…	K20653|0.0e+00|ssc:100517882|K20653 GEM interacting protein | (RefSeq) GMIP; GEM-interacting protein isoform X1	--	[T]	Signal transduction mechanisms	RhoGAP domain	Rho GTPase-activating protein 29 OS=Bos taurus OX=9913 GN=ARHGAP29 PE=2 SV=1	T	Signal transduction mechanisms	GEM-interacting protein isoform X1 [Sus scrofa]	molecular function: molecular function regulator (GO:0098772);; biological process: biological regulation (GO:0065007);; cellular component: cell (GO:0005623);; cellular component: organelle (GO:0043226);; cellular component: organelle part (GO:0044422);; cellular component: cell part (GO:0044464);; cellular component: membrane (GO:0016020);; biological process: cellular process (GO:0009987);; bi…
ENSSSCG00000013940	NLRP3	0.632103	108	1.05449	171	0.422485	71	0.725824	120	0.281866	59	0.267126	50	0.289643	64	0.313568	51	5.54841e-05	1.11624	up	[T]	Signal transduction mechanisms	Molecular Function: ATP binding (GO:0005524);; Biological Process: positive regulation of cysteine-type endopeptidase activity involved in apoptotic process (GO:0043280);; Biological Process: positive regulation of interleukin-1 beta secretion (GO:0050718);; Biological Process: negative regulation of NIK/NF-kappaB signaling (GO:1901223);;	K12800|0.0e+00|ssc:100514823|K12800 NACHT, LRR and PYD domains-containing protein 3 | (RefSeq) NLRP3; NACHT, LRR and PYD domains-containing protein 3	Necroptosis (ko04217);; NOD-like receptor signaling pathway (ko04621);; C-type lectin receptor signaling pathway (ko04625);; Salmonella infection (ko05132);; Pertussis (ko05133);; Yersinia infection (ko05135);; Influenza A (ko05164)	--	--	NACHT domain	NACHT, LRR and PYD domains-containing protein 3 OS=Bos taurus OX=9913 GN=NLRP3 PE=2 SV=1	K	Transcription	NACHT, LRR and PYD domains-containing protein 3 [Sus scrofa]	molecular function: binding (GO:0005488);; biological process: biological regulation (GO:0065007)
ENSSSCG00000014007	FLT4	0.283904	72	0.314178	74	0.336853	82	0.221939	55	0.191931	51	0.163021	44	0.152955	41	0.113818	28	0.00116846	0.83661	up	[U]	Intracellular trafficking, secretion, and vesicular transport	Biological Process: positive regulation of endothelial cell proliferation (GO:0001938);; Biological Process: lymphangiogenesis (GO:0001946);; Biological Process: sprouting angiogenesis (GO:0002040);; Biological Process: respiratory system process (GO:0003016);; Molecular Function: transmembrane receptor protein tyrosine kinase activity (GO:0004714);; Molecular Function: vascular endothelial growt…	K05097|0.0e+00|ssc:100518179|K05097 FMS-like tyrosine kinase 4 [EC:2.7.10.1] | (RefSeq) FLT4; vascular endothelial growth factor receptor 3	MAPK signaling pathway (ko04010);; Ras signaling pathway (ko04014);; Rap1 signaling pathway (ko04015);; PI3K-Akt signaling pathway (ko04151);; Focal adhesion (ko04510);; Pathways in cancer (ko05200);; Breast cancer (ko05224)	[T]	Signal transduction mechanisms	Protein tyrosine and serine/threonine kinase	Mast/stem cell growth factor receptor Kit OS=Capra hircus OX=9925 GN=KIT PE=2 SV=1	T	Signal transduction mechanisms	vascular endothelial growth factor receptor 3 [Sus scrofa]	biological process: biological regulation (GO:0065007);; biological process: developmental process (GO:0032502);; biological process: single-organism process (GO:0044699);; biological process: multicellular organismal process (GO:0032501);; molecular function: catalytic activity (GO:0003824);; molecular function: signal transducer activity (GO:0004871);; molecular function: molecular transducer a…
ENSSSCG00000014030	PHYKPL	1.27415	130	1.67275	151	1.28752	117	1.22976	121	0.829921	88	0.855526	94	0.410269	44	0.787185	71	0.000573572	0.851205	up	[T]	Signal transduction mechanisms	Molecular Function: transaminase activity (GO:0008483);; Molecular Function: pyridoxal phosphate binding (GO:0030170);;	K18202|8.8e-235|ssc:100521952|K18202 5-phosphonooxy-L-lysine phospho-lyase [EC:4.2.3.134] | (RefSeq) PHYKPL; 5-phosphohydroxy-L-lysine phospho-lyase isoform X2	Lysine degradation (ko00310)	[R]	General function prediction only	Aminotransferase class-III	Ethanolamine-phosphate phospho-lyase OS=Bos taurus OX=9913 GN=ETNPPL PE=2 SV=1	E	Amino acid transport and metabolism	5-phosphohydroxy-L-lysine phospho-lyase isoform X2 [Sus scrofa]	molecular function: catalytic activity (GO:0003824);; molecular function: binding (GO:0005488)
ENSSSCG00000014034	N4BP3	1.89348	537	1.50781	402	1.60666	450	1.50355	417	1.0291	306	0.946739	290	0.945207	281	1.28313	347	0.000145384	0.595346	up	--	--	Cellular Component: cytoplasmic vesicle (GO:0031410);;	--	--	--	--	Fez1	Leucine zipper putative tumor suppressor 2 OS=Bos taurus OX=9913 GN=LZTS2 PE=2 SV=1	S	Function unknown	NEDD4-binding protein 3 [Sus scrofa]	cellular component: cell (GO:0005623);; cellular component: organelle (GO:0043226);; cellular component: cell part (GO:0044464)
ENSSSCG00000014097	ENSSSCG00000014097	0.701859	160	0.551845	119	0.860411	193	0.907483	202	0.540781	130	0.370125	77	0.531859	109	0.59079	115	0.0051689	0.685985	up	--	--	Molecular Function: 3',5'-cyclic-nucleotide phosphodiesterase activity (GO:0004114);; Biological Process: signal transduction (GO:0007165);; Molecular Function: metal ion binding (GO:0046872);;	K18437|2.3e-207|ssc:100522306|K18437 high affinity cAMP-specific and IBMX-insensitive 3',5'-cyclic phosphodiesterase 8 [EC:3.1.4.53] | (RefSeq) PDE8B; high affinity cAMP-specific and IBMX-insensitive 3',5'-cyclic phosphodiesterase 8B isoform X3	Purine metabolism (ko00230);; Cortisol synthesis and secretion (ko04927);; Cushing syndrome (ko04934);; Morphine addiction (ko05032)	[T]	Signal transduction mechanisms	3'5'-cyclic nucleotide phosphodiesterase	High affinity cGMP-specific 3',5'-cyclic phosphodiesterase 9A OS=Pan troglodytes OX=9598 GN=PDE9A PE=1 SV=1	T	Signal transduction mechanisms	high affinity cAMP-specific and IBMX-insensitive 3',5'-cyclic phosphodiesterase 8B isoform X4 [Sus scrofa]	molecular function: catalytic activity (GO:0003824);; biological process: cellular process (GO:0009987);; biological process: biological regulation (GO:0065007);; molecular function: binding (GO:0005488)
ENSSSCG00000014108	BHMT	0.704462	67	0.440565	50	0.513842	52	0.253011	30	0.736511	74	1.00522	104	0.703856	76	1.55186	141	0.00136124	-0.967008	down	[E]	Amino acid transport and metabolism	Molecular Function: zinc ion binding (GO:0008270);; Biological Process: methionine biosynthetic process (GO:0009086);; Biological Process: methylation (GO:0032259);; Molecular Function: betaine-homocysteine S-methyltransferase activity (GO:0047150);;	K00544|2.8e-233|ssc:397371|K00544 betaine-homocysteine S-methyltransferase [EC:2.1.1.5] | (RefSeq) BHMT; betaine--homocysteine S-methyltransferase 1	Glycine, serine and threonine metabolism (ko00260);; Cysteine and methionine metabolism (ko00270)	[E]	Amino acid transport and metabolism	Homocysteine S-methyltransferase	Betaine--homocysteine S-methyltransferase 1 OS=Bos taurus OX=9913 GN=BHMT PE=2 SV=1	E	Amino acid transport and metabolism	betaine--homocysteine S-methyltransferase 1 [Sus scrofa]	molecular function: binding (GO:0005488);; biological process: metabolic process (GO:0008152);; biological process: cellular process (GO:0009987);; biological process: single-organism process (GO:0044699);; molecular function: catalytic activity (GO:0003824)
ENSSSCG00000014117	THBS4	18.1157	2533	16.8576	2215	19.9362	2752	16.0518	2194	20.7233	3035	26.9976	4081	26.2926	3860	30.7813	4109	7.82814e-08	-0.600954	down	--	--	Molecular Function: calcium ion binding (GO:0005509);; Cellular Component: extracellular region (GO:0005576);; Biological Process: cell adhesion (GO:0007155);;	K04659|0.0e+00|ssc:100513005|K04659 thrombospondin 2/3/4/5 | (RefSeq) THBS4; LOW QUALITY PROTEIN: thrombospondin-4	Phagosome (ko04145);; PI3K-Akt signaling pathway (ko04151);; Focal adhesion (ko04510);; ECM-receptor interaction (ko04512);; Malaria (ko05144);; Human papillomavirus infection (ko05165)	--	--	Thrombospondin C-terminal region	Thrombospondin-4 OS=Bos taurus OX=9913 GN=THBS4 PE=2 SV=1	T	Signal transduction mechanisms	LOW QUALITY PROTEIN: thrombospondin-4 [Sus scrofa]	molecular function: binding (GO:0005488);; cellular component: extracellular region (GO:0005576);; biological process: biological adhesion (GO:0022610)
ENSSSCG00000014221	LVRN	4.49875	828	3.78238	647	3.31633	607	3.69115	622	2.49848	482	1.98991	404	2.31508	455	2.42344	435	1.44026e-06	0.645599	up	[E]	Amino acid transport and metabolism	Cellular Component: cytoplasm (GO:0005737);; Cellular Component: plasma membrane (GO:0005886);; Biological Process: proteolysis (GO:0006508);; Molecular Function: zinc ion binding (GO:0008270);; Molecular Function: peptide binding (GO:0042277);; Biological Process: peptide catabolic process (GO:0043171);; Molecular Function: metalloaminopeptidase activity (GO:0070006);;	K13724|0.0e+00|ssc:100521657|K13724 aminopeptidase Q [EC:3.4.11.-] | (RefSeq) LVRN; aminopeptidase Q isoform X1	--	[EO]	Amino acid transport and metabolism;; Posttranslational modification, protein turnover, chaperones	Peptidase family M1 domain	Aminopeptidase Q OS=Felis catus OX=9685 GN=LVRN PE=1 SV=5	--	--	aminopeptidase Q isoform X1 [Sus scrofa]	cellular component: cell (GO:0005623);; cellular component: cell part (GO:0044464);; cellular component: membrane (GO:0016020);; biological process: metabolic process (GO:0008152);; molecular function: binding (GO:0005488);; biological process: cellular process (GO:0009987);; molecular function: catalytic activity (GO:0003824)
ENSSSCG00000014224	SEMA6A	1.41573	429	1.20652	336	1.5561	465	1.10786	328	0.712116	227	0.57135	186	0.756017	241	0.951053	275	3.9681e-05	0.777956	up	--	--	Biological Process: neural crest cell migration (GO:0001755);; Biological Process: neuron migration (GO:0001764);; Molecular Function: transmembrane signaling receptor activity (GO:0004888);; Cellular Component: extracellular space (GO:0005615);; Cellular Component: integral component of plasma membrane (GO:0005887);; Biological Process: axon guidance (GO:0007411);; Molecular Function: semaphorin…	K06842|0.0e+00|cfr:102510280|K06842 semaphorin 6 | (RefSeq) SEMA6A; semaphorin-6A isoform X1	Axon guidance (ko04360)	[T]	Signal transduction mechanisms	Sema domain	Semaphorin-6D OS=Pongo abelii OX=9601 GN=SEMA6D PE=2 SV=1	T	Signal transduction mechanisms	semaphorin-6A isoform X1 [Sus scrofa]	biological process: cellular process (GO:0009987);; biological process: locomotion (GO:0040011);; biological process: single-organism process (GO:0044699);; biological process: localization (GO:0051179);; molecular function: signal transducer activity (GO:0004871);; molecular function: molecular transducer activity (GO:0060089);; biological process: signaling (GO:0023052);; biological process: re…
ENSSSCG00000014242	ENSSSCG00000014242	2.27022	215	1.7977	160	2.24624	210	1.68186	156	1.31732	131	0.970387	100	1.41433	141	1.14527	104	0.00107897	0.680768	up	--	--	Cellular Component: nucleus (GO:0005634);; Biological Process: regulation of transcription from RNA polymerase II promoter (GO:0006357);;	K10847|6.5e-29|spu:582941|K10847 DNA-repair protein complementing XP-A cells | (RefSeq) zinc finger protein 608 isoform X1	Nucleotide excision repair (ko03420)	--	--	--	--	S	Function unknown	zinc finger protein 608 [Rhinolophus ferrumequinum]	cellular component: cell (GO:0005623);; cellular component: organelle (GO:0043226);; cellular component: cell part (GO:0044464);; biological process: biological regulation (GO:0065007)
ENSSSCG00000014249	MARCHF3	3.29094	270	2.99734	230	2.4476	198	3.6017	288	4.58965	393	4.57026	404	4.54154	389	4.68576	364	0.000175831	-0.607626	down	--	--	Molecular Function: ubiquitin-protein transferase activity (GO:0004842);; Molecular Function: zinc ion binding (GO:0008270);; Cellular Component: integral component of membrane (GO:0016021);; Biological Process: protein ubiquitination (GO:0016567);;	K10658|7.4e-147|ssc:100513526|K10658 E3 ubiquitin-protein ligase MARCH3 [EC:2.3.2.27] | (RefSeq) MARCH3; E3 ubiquitin-protein ligase MARCH3	--	[A]	RNA processing and modification	RING-variant domain	E3 ubiquitin-protein ligase MARCHF3 OS=Bos taurus OX=9913 GN=MARCHF3 PE=2 SV=1	A	RNA processing and modification	E3 ubiquitin-protein ligase MARCHF3 [Sus scrofa]	molecular function: catalytic activity (GO:0003824);; molecular function: binding (GO:0005488);; cellular component: membrane (GO:0016020);; cellular component: membrane part (GO:0044425);; biological process: metabolic process (GO:0008152);; biological process: cellular process (GO:0009987)
ENSSSCG00000014257	SLC27A6	3.08907	321	3.19009	305	3.2434	337	2.85743	287	2.01462	213	1.37139	150	1.62252	178	2.45573	242	0.00036251	0.707772	up	[IQ]	Lipid transport and metabolism;; Secondary metabolites biosynthesis, transport and catabolism	Molecular Function: long-chain fatty acid-CoA ligase activity (GO:0004467);; Biological Process: fatty acid transport (GO:0015908);; Cellular Component: integral component of membrane (GO:0016021);; Molecular Function: very long-chain fatty acid-CoA ligase activity (GO:0031957);;	K08749|0.0e+00|ssc:100517271|K08749 solute carrier family 27 (fatty acid transporter), member 6 | (RefSeq) SLC27A6; long-chain fatty acid transport protein 6 isoform X1	PPAR signaling pathway (ko03320);; Insulin resistance (ko04931)	[I]	Lipid transport and metabolism	AMP-binding enzyme	Long-chain fatty acid transport protein 4 OS=Macaca fascicularis OX=9541 GN=SLC27A4 PE=2 SV=2	I	Lipid transport and metabolism	long-chain fatty acid transport protein 6 isoform X3 [Sus scrofa]	molecular function: catalytic activity (GO:0003824);; biological process: single-organism process (GO:0044699);; biological process: localization (GO:0051179);; cellular component: membrane (GO:0016020);; cellular component: membrane part (GO:0044425)
ENSSSCG00000014258	ISOC1	23.3504	2024	27.7306	2260	24.3619	2095	23.1118	1966	16.6995	1519	13.2418	1242	15.8958	1445	15.2938	1263	7.93152e-13	0.655742	up	[HR]	Coenzyme transport and metabolism;; General function prediction only	Molecular Function: catalytic activity (GO:0003824);;	K04432|3.0e-07|tsp:Tsp_02206|K04432 mitogen-activated protein kinase kinase 3 [EC:2.7.12.2] | (RefSeq) dual specificity mitogen-activated protein kinase kinase 3	MAPK signaling pathway (ko04010)	[R]	General function prediction only	Isochorismatase family	Isochorismatase domain-containing protein 1 OS=Bos taurus OX=9913 GN=ISOC1 PE=2 SV=1	Q	Secondary metabolites biosynthesis, transport and catabolism	isochorismatase domain-containing protein 1 [Sus scrofa]	molecular function: catalytic activity (GO:0003824)
[truncated: 483 more rows]
