# Supplementary material for: Transcriptome and Metabolome Analyses Provide Insight into the Glucose-Induced Adipogenesis in Porcine Adipocytes
Source: Curr Issues Mol Biol. 2024 Mar 3;46(3):2027–42. doi: 10.3390/cimb46030131 (PMC10968871; doi:10.3390/cimb46030131)
Supplement: Supplementary file 1 [file cimb-46-00131-s001.zip › Table S4. Overview of significant enriched GO terms.xlsx]

## Sheet: Sheet1
Table S4. Overview of significant enriched GO terms
ID	Description	Type	GeneRatio	BgRatio	enrich_factor	pvalue	qvalue	geneID	Count	regulated
GO:0048843	negative regulation of axon extension involved in axon guidance	biological_process	7/550	16/12918	10.28	1.99725e-06	0.00410171	ENSSSCG00000006495/ENSSSCG00000014224/ENSSSCG00000015396/ENSSSCG00000015398/ENSSSCG00000023784/ENSSSCG00000035176/ENSSSCG00000035859	7	up&down
GO:0071526	semaphorin-plexin signaling pathway	biological_process	6/550	13/12918	10.84	7.70146e-06	0.0055596	ENSSSCG00000006495/ENSSSCG00000014224/ENSSSCG00000015396/ENSSSCG00000015398/ENSSSCG00000023784/ENSSSCG00000035176	6	up&down
GO:0000281	mitotic cytokinesis	biological_process	8/550	26/12918	7.23	8.1214e-06	0.0055596	ENSSSCG00000009378/ENSSSCG00000009839/ENSSSCG00000014326/ENSSSCG00000016658/ENSSSCG00000017761/ENSSSCG00000026748/ENSSSCG00000038543/ENSSSCG00000040486	8	up&down
GO:0050873	brown fat cell differentiation	biological_process	7/550	20/12918	8.22	1.16593e-05	0.00598615	ENSSSCG00000002866/ENSSSCG00000007346/ENSSSCG00000009240/ENSSSCG00000015579/ENSSSCG00000023915/ENSSSCG00000039103/ENSSSCG00000040681	7	up&down
GO:0050919	negative chemotaxis	biological_process	6/550	16/12918	8.81	3.22066e-05	0.0132284	ENSSSCG00000006495/ENSSSCG00000014224/ENSSSCG00000015396/ENSSSCG00000015398/ENSSSCG00000023784/ENSSSCG00000035176	6	up&down
GO:0006954	inflammatory response	biological_process	16/550	121/12918	3.11	5.31627e-05	0.0181966	ENSSSCG00000003017/ENSSSCG00000008953/ENSSSCG00000009002/ENSSSCG00000011322/ENSSSCG00000011453/ENSSSCG00000012118/ENSSSCG00000014369/ENSSSCG00000015476/ENSSSCG00000015579/ENSSSCG00000015801/ENSSSCG00000022849/ENSSSCG00000029371/ENSSSCG00000034722/ENSSSCG00000035355/ENSSSCG00000035419/ENSSSCG00000039798	16	up&down
GO:0001755	neural crest cell migration	biological_process	7/550	26/12918	6.32	7.91648e-05	0.0232256	ENSSSCG00000006495/ENSSSCG00000009477/ENSSSCG00000014224/ENSSSCG00000015396/ENSSSCG00000015398/ENSSSCG00000023784/ENSSSCG00000035176	7	up&down
GO:0019367	fatty acid elongation, saturated fatty acid	biological_process	4/550	7/12918	13.42	0.000102665	0.0263553	ENSSSCG00000001045/ENSSSCG00000024149/ENSSSCG00000028080/ENSSSCG00000036236	4	up&down
GO:0042761	very long-chain fatty acid biosynthetic process	biological_process	5/550	13/12918	9.03	0.000133007	0.0303505	ENSSSCG00000001045/ENSSSCG00000024149/ENSSSCG00000028080/ENSSSCG00000031299/ENSSSCG00000036236	5	up&down
GO:0070373	negative regulation of ERK1 and ERK2 cascade	biological_process	8/550	40/12918	4.7	0.000236164	0.0485007	ENSSSCG00000009482/ENSSSCG00000010831/ENSSSCG00000018051/ENSSSCG00000026422/ENSSSCG00000030309/ENSSSCG00000035372/ENSSSCG00000039103/ENSSSCG00000040961	8	up
GO:0045730	respiratory burst	biological_process	4/550	9/12918	10.44	0.000345135	0.0611222	ENSSSCG00000000137/ENSSSCG00000015559/ENSSSCG00000036246/ENSSSCG00000039798	4	up
GO:0050728	negative regulation of inflammatory response	biological_process	9/550	53/12918	3.99	0.000357147	0.0611222	ENSSSCG00000003088/ENSSSCG00000003333/ENSSSCG00000003582/ENSSSCG00000006002/ENSSSCG00000009671/ENSSSCG00000021059/ENSSSCG00000026422/ENSSSCG00000029305/ENSSSCG00000039103	9	up&down
GO:0045143	homologous chromosome segregation	biological_process	4/550	10/12918	9.39	0.000555907	0.0878199	ENSSSCG00000000265/ENSSSCG00000011207/ENSSSCG00000017032/ENSSSCG00000026748	4	down
GO:0007052	mitotic spindle organization	biological_process	6/550	26/12918	5.42	0.000643613	0.0944128	ENSSSCG00000006333/ENSSSCG00000007493/ENSSSCG00000015924/ENSSSCG00000023296/ENSSSCG00000029326/ENSSSCG00000040486	6	down
GO:0030194	positive regulation of blood coagulation	biological_process	3/550	5/12918	14.09	0.000719817	0.0952012	ENSSSCG00000009237/ENSSSCG00000015405/ENSSSCG00000035355	3	up
GO:0000070	mitotic sister chromatid segregation	biological_process	5/550	18/12918	6.52	0.0007417	0.0952012	ENSSSCG00000000265/ENSSSCG00000011207/ENSSSCG00000026748/ENSSSCG00000027984/ENSSSCG00000032909	5	down
GO:0006633	fatty acid biosynthetic process	biological_process	5/550	19/12918	6.18	0.000971662	0.100441	ENSSSCG00000007857/ENSSSCG00000010554/ENSSSCG00000017421/ENSSSCG00000017694/ENSSSCG00000026453	5	up
GO:0050729	positive regulation of inflammatory response	biological_process	6/550	28/12918	5.03	0.000979651	0.100441	ENSSSCG00000002866/ENSSSCG00000009002/ENSSSCG00000011436/ENSSSCG00000015801/ENSSSCG00000035859/ENSSSCG00000040681	6	up&down
GO:0051607	defense response to virus	biological_process	11/550	86/12918	3	0.00101886	0.100441	ENSSSCG00000008648/ENSSSCG00000009720/ENSSSCG00000010451/ENSSSCG00000010452/ENSSSCG00000011358/ENSSSCG00000012077/ENSSSCG00000012118/ENSSSCG00000015801/ENSSSCG00000016573/ENSSSCG00000032652/ENSSSCG00000040575	11	up&down
GO:0010875	positive regulation of cholesterol efflux	biological_process	4/550	12/12918	7.83	0.001224	0.100441	ENSSSCG00000003088/ENSSSCG00000007435/ENSSSCG00000039103/ENSSSCG00000039703	4	up
GO:0051382	kinetochore assembly	biological_process	4/550	12/12918	7.83	0.001224	0.100441	ENSSSCG00000023296/ENSSSCG00000038543/ENSSSCG00000039216/ENSSSCG00000045632	4	down
GO:0007080	mitotic metaphase plate congression	biological_process	5/550	20/12918	5.87	0.00125064	0.100441	ENSSSCG00000001510/ENSSSCG00000023296/ENSSSCG00000029326/ENSSSCG00000029509/ENSSSCG00000032909	5	down
GO:0030168	platelet activation	biological_process	5/550	20/12918	5.87	0.00125064	0.100441	ENSSSCG00000008103/ENSSSCG00000010629/ENSSSCG00000011721/ENSSSCG00000017006/ENSSSCG00000035355	5	up
GO:0000212	meiotic spindle organization	biological_process	3/550	6/12918	11.74	0.0013941	0.100441	ENSSSCG00000000265/ENSSSCG00000007493/ENSSSCG00000010214	3	down
GO:0034626	fatty acid elongation, polyunsaturated fatty acid	biological_process	3/550	6/12918	11.74	0.0013941	0.100441	ENSSSCG00000001045/ENSSSCG00000024149/ENSSSCG00000028080	3	up&down
GO:0051315	attachment of mitotic spindle microtubules to kinetochore	biological_process	3/550	6/12918	11.74	0.0013941	0.100441	ENSSSCG00000003697/ENSSSCG00000003931/ENSSSCG00000006333	3	down
GO:0009617	response to bacterium	biological_process	9/550	64/12918	3.3	0.00146614	0.100441	ENSSSCG00000009240/ENSSSCG00000013418/ENSSSCG00000015355/ENSSSCG00000017258/ENSSSCG00000021712/ENSSSCG00000033822/ENSSSCG00000039103/ENSSSCG00000039798/ENSSSCG00000040681	9	up&down
GO:0015874	norepinephrine transport	biological_process	2/550	2/12918	23.49	0.00180958	0.100441	ENSSSCG00000002827/ENSSSCG00000017121	2	up&down
GO:0032805	positive regulation of low-density lipoprotein particle receptor catabolic process	biological_process	2/550	2/12918	23.49	0.00180958	0.100441	ENSSSCG00000003088/ENSSSCG00000025020	2	up
GO:0043932	ossification involved in bone remodeling	biological_process	2/550	2/12918	23.49	0.00180958	0.100441	ENSSSCG00000003017/ENSSSCG00000006051	2	up&down
GO:0060666	dichotomous subdivision of terminal units involved in salivary gland branching	biological_process	2/550	2/12918	23.49	0.00180958	0.100441	ENSSSCG00000015398/ENSSSCG00000023784	2	down
GO:0070245	positive regulation of thymocyte apoptotic process	biological_process	2/550	2/12918	23.49	0.00180958	0.100441	ENSSSCG00000010772/ENSSSCG00000035859	2	up
GO:0070741	response to interleukin-6	biological_process	2/550	2/12918	23.49	0.00180958	0.100441	ENSSSCG00000012409/ENSSSCG00000015476	2	up
GO:0071415	cellular response to purine-containing compound	biological_process	2/550	2/12918	23.49	0.00180958	0.100441	ENSSSCG00000011721/ENSSSCG00000023762	2	up
GO:0098883	synapse disassembly	biological_process	2/550	2/12918	23.49	0.00180958	0.100441	ENSSSCG00000016230/ENSSSCG00000038706	2	up&down
GO:1903598	positive regulation of gap junction assembly	biological_process	2/550	2/12918	23.49	0.00180958	0.100441	ENSSSCG00000010184/ENSSSCG00000012138	2	up
GO:1905448	positive regulation of mitochondrial ATP synthesis coupled electron transport	biological_process	2/550	2/12918	23.49	0.00180958	0.100441	ENSSSCG00000010214/ENSSSCG00000029326	2	down
GO:0014068	positive regulation of phosphatidylinositol 3-kinase signaling	biological_process	6/550	32/12918	4.4	0.00203961	0.11023	ENSSSCG00000002918/ENSSSCG00000010184/ENSSSCG00000010509/ENSSSCG00000013292/ENSSSCG00000026422/ENSSSCG00000035355	6	up
GO:0006955	immune response	biological_process	18/550	199/12918	2.12	0.00211578	0.111414	ENSSSCG00000001455/ENSSSCG00000001469/ENSSSCG00000008090/ENSSSCG00000008953/ENSSSCG00000008959/ENSSSCG00000009240/ENSSSCG00000010893/ENSSSCG00000011322/ENSSSCG00000013553/ENSSSCG00000015405/ENSSSCG00000015662/ENSSSCG00000016855/ENSSSCG00000017006/ENSSSCG00000018050/ENSSSCG00000033457/ENSSSCG00000035736/ENSSSCG00000037579/ENSSSCG00000040961	18	up&down
GO:0001818	negative regulation of cytokine production	biological_process	4/550	14/12918	6.71	0.00231258	0.115528	ENSSSCG00000008103/ENSSSCG00000026742/ENSSSCG00000030309/ENSSSCG00000039798	4	up
GO:0010575	positive regulation of vascular endothelial growth factor production	biological_process	4/550	14/12918	6.71	0.00231258	0.115528	ENSSSCG00000009237/ENSSSCG00000014007/ENSSSCG00000029371/Sus_scrofa_newGene_1473	4	up
GO:0045080	positive regulation of chemokine biosynthetic process	biological_process	3/550	7/12918	10.07	0.00236267	0.115528	ENSSSCG00000014336/ENSSSCG00000015801/ENSSSCG00000035859	3	up&down
GO:0051017	actin filament bundle assembly	biological_process	5/550	23/12918	5.11	0.0024423	0.116644	ENSSSCG00000000111/ENSSSCG00000009412/ENSSSCG00000012597/ENSSSCG00000020736/ENSSSCG00000032341	5	up&down
GO:0002819	regulation of adaptive immune response	biological_process	3/550	8/12918	8.81	0.00366123	0.147623	ENSSSCG00000006379/ENSSSCG00000010831/ENSSSCG00000015662	3	up
GO:0016322	neuron remodeling	biological_process	3/550	8/12918	8.81	0.00366123	0.147623	ENSSSCG00000000896/ENSSSCG00000003524/ENSSSCG00000024071	3	up&down
GO:0006641	triglyceride metabolic process	biological_process	4/550	16/12918	5.87	0.00392924	0.147623	ENSSSCG00000003088/ENSSSCG00000016420/ENSSSCG00000025020/ENSSSCG00000033623	4	up
GO:0010800	positive regulation of peptidyl-threonine phosphorylation	biological_process	4/550	16/12918	5.87	0.00392924	0.147623	ENSSSCG00000003017/ENSSSCG00000015476/ENSSSCG00000026748/ENSSSCG00000035859	4	up&down
GO:0030574	collagen catabolic process	biological_process	4/550	16/12918	5.87	0.00392924	0.147623	ENSSSCG00000006132/ENSSSCG00000010948/ENSSSCG00000014984/ENSSSCG00000034440	4	up&down
GO:0070374	positive regulation of ERK1 and ERK2 cascade	biological_process	11/550	102/12918	2.53	0.00403271	0.147623	ENSSSCG00000003088/ENSSSCG00000011322/ENSSSCG00000014007/ENSSSCG00000015405/ENSSSCG00000015476/ENSSSCG00000024655/ENSSSCG00000026422/ENSSSCG00000029371/ENSSSCG00000034722/ENSSSCG00000035355/ENSSSCG00000039270	11	up
GO:0007267	cell-cell signaling	biological_process	9/550	74/12918	2.86	0.00404399	0.147623	ENSSSCG00000006051/ENSSSCG00000007139/ENSSSCG00000009661/ENSSSCG00000010629/ENSSSCG00000011322/ENSSSCG00000011443/ENSSSCG00000018050/ENSSSCG00000026850/ENSSSCG00000038677	9	up&down
GO:0007094	mitotic spindle assembly checkpoint	biological_process	4/550	17/12918	5.53	0.00496748	0.147623	ENSSSCG00000004466/ENSSSCG00000026748/ENSSSCG00000030469/ENSSSCG00000040486	4	down
GO:0001822	kidney development	biological_process	6/550	38/12918	3.71	0.00500859	0.147623	ENSSSCG00000001909/ENSSSCG00000010184/ENSSSCG00000011358/ENSSSCG00000011723/ENSSSCG00000015581/ENSSSCG00000025020	6	up&down
GO:0000050	urea cycle	biological_process	2/550	3/12918	15.66	0.00527519	0.147623	ENSSSCG00000002866/ENSSSCG00000004195	2	up
GO:0000910	cytokinesis	biological_process	2/550	3/12918	15.66	0.00527519	0.147623	ENSSSCG00000016658/ENSSSCG00000040486	2	down
GO:0006068	ethanol catabolic process	biological_process	2/550	3/12918	15.66	0.00527519	0.147623	ENSSSCG00000032374/ENSSSCG00000033207	2	up
GO:0006564	L-serine biosynthetic process	biological_process	2/550	3/12918	15.66	0.00527519	0.147623	ENSSSCG00000005287/ENSSSCG00000006717	2	down
GO:0021891	olfactory bulb interneuron development	biological_process	2/550	3/12918	15.66	0.00527519	0.147623	ENSSSCG00000003201/ENSSSCG00000035859	2	up&down
GO:0030853	negative regulation of granulocyte differentiation	biological_process	2/550	3/12918	15.66	0.00527519	0.147623	ENSSSCG00000038706/ENSSSCG00000039103	2	up
GO:0051583	dopamine uptake involved in synaptic transmission	biological_process	2/550	3/12918	15.66	0.00527519	0.147623	ENSSSCG00000002827/ENSSSCG00000017121	2	up&down
GO:0060086	circadian temperature homeostasis	biological_process	2/550	3/12918	15.66	0.00527519	0.147623	ENSSSCG00000004898/ENSSSCG00000014336	2	up
GO:0060744	mammary gland branching involved in thelarche	biological_process	2/550	3/12918	15.66	0.00527519	0.147623	ENSSSCG00000024655/ENSSSCG00000035859	2	up
GO:0060907	positive regulation of macrophage cytokine production	biological_process	2/550	3/12918	15.66	0.00527519	0.147623	ENSSSCG00000015405/ENSSSCG00000035859	2	up
GO:0071726	cellular response to diacyl bacterial lipopeptide	biological_process	2/550	3/12918	15.66	0.00527519	0.147623	ENSSSCG00000014369/ENSSSCG00000015405	2	up
GO:0090175	regulation of establishment of planar polarity	biological_process	2/550	3/12918	15.66	0.00527519	0.147623	ENSSSCG00000006051/ENSSSCG00000032279	2	down
GO:1900272	negative regulation of long-term synaptic potentiation	biological_process	2/550	3/12918	15.66	0.00527519	0.147623	ENSSSCG00000003088/ENSSSCG00000016230	2	up&down
GO:1904184	positive regulation of pyruvate dehydrogenase activity	biological_process	2/550	3/12918	15.66	0.00527519	0.147623	ENSSSCG00000011434/ENSSSCG00000036751	2	up
GO:1904753	negative regulation of vascular associated smooth muscle cell migration	biological_process	2/550	3/12918	15.66	0.00527519	0.147623	ENSSSCG00000026422/ENSSSCG00000039103	2	up
GO:0006636	unsaturated fatty acid biosynthetic process	biological_process	3/550	9/12918	7.83	0.00531928	0.147623	ENSSSCG00000001045/ENSSSCG00000024149/ENSSSCG00000028080	3	up&down
GO:0019432	triglyceride biosynthetic process	biological_process	3/550	9/12918	7.83	0.00531928	0.147623	ENSSSCG00000008624/ENSSSCG00000014861/ENSSSCG00000027266	3	up
GO:0034501	protein localization to kinetochore	biological_process	3/550	9/12918	7.83	0.00531928	0.147623	ENSSSCG00000004466/ENSSSCG00000010214/ENSSSCG00000039107	3	down
GO:0045778	positive regulation of ossification	biological_process	3/550	9/12918	7.83	0.00531928	0.147623	ENSSSCG00000006051/ENSSSCG00000008649/ENSSSCG00000035859	3	up&down
GO:0050872	white fat cell differentiation	biological_process	3/550	9/12918	7.83	0.00531928	0.147623	ENSSSCG00000002866/ENSSSCG00000007346/ENSSSCG00000040681	3	up
GO:0051044	positive regulation of membrane protein ectodomain proteolysis	biological_process	3/550	9/12918	7.83	0.00531928	0.147623	ENSSSCG00000003088/ENSSSCG00000010629/ENSSSCG00000010772	3	up
GO:2000484	positive regulation of interleukin-8 secretion	biological_process	3/550	9/12918	7.83	0.00531928	0.147623	ENSSSCG00000014369/ENSSSCG00000035355/ENSSSCG00000035859	3	up
GO:0002244	hematopoietic progenitor cell differentiation	biological_process	7/550	52/12918	3.16	0.00619109	0.169527	ENSSSCG00000002315/ENSSSCG00000003017/ENSSSCG00000004366/ENSSSCG00000008796/ENSSSCG00000016574/ENSSSCG00000016658/ENSSSCG00000021712	7	up&down
GO:0007165	signal transduction	biological_process	31/550	456/12918	1.6	0.00691525	0.184349	ENSSSCG00000000298/ENSSSCG00000001535/ENSSSCG00000003805/ENSSSCG00000004205/ENSSSCG00000004806/ENSSSCG00000006002/ENSSSCG00000006051/ENSSSCG00000006372/ENSSSCG00000007682/ENSSSCG00000008344/ENSSSCG00000009956/ENSSSCG00000010381/ENSSSCG00000012754/ENSSSCG00000012790/ENSSSCG00000013388/ENSSSCG00000013839/ENSSSCG00000014097/ENSSSCG00000016810/ENSSSCG00000017006/ENSSSCG00000017498/ENSSSCG00000017918/…	31	up&down
GO:0043407	negative regulation of MAP kinase activity	biological_process	5/550	29/12918	4.05	0.0069861	0.184349	ENSSSCG00000003088/ENSSSCG00000009482/ENSSSCG00000010184/ENSSSCG00000022945/ENSSSCG00000039103	5	up&down
GO:0019934	cGMP-mediated signaling	biological_process	3/550	10/12918	7.05	0.00736072	0.184349	ENSSSCG00000003088/ENSSSCG00000015405/ENSSSCG00000030016	3	up
GO:0040037	negative regulation of fibroblast growth factor receptor signaling pathway	biological_process	3/550	10/12918	7.05	0.00736072	0.184349	ENSSSCG00000009482/ENSSSCG00000030113/ENSSSCG00000035859	3	up&down
GO:0048566	embryonic digestive tract development	biological_process	3/550	10/12918	7.05	0.00736072	0.184349	ENSSSCG00000001909/ENSSSCG00000008953/ENSSSCG00000035419	3	up&down
GO:0051930	regulation of sensory perception of pain	biological_process	3/550	10/12918	7.05	0.00736072	0.184349	ENSSSCG00000017607/ENSSSCG00000021059/ENSSSCG00000035355	3	up
GO:0070555	response to interleukin-1	biological_process	3/550	10/12918	7.05	0.00736072	0.184349	ENSSSCG00000004898/ENSSSCG00000012409/ENSSSCG00000015476	3	up
GO:0007204	positive regulation of cytosolic calcium ion concentration	biological_process	7/550	54/12918	3.04	0.00762045	0.188554	ENSSSCG00000007139/ENSSSCG00000009661/ENSSSCG00000011322/ENSSSCG00000015405/ENSSSCG00000027952/ENSSSCG00000029371/ENSSSCG00000035355	7	up&down
GO:0006898	receptor-mediated endocytosis	biological_process	5/550	30/12918	3.91	0.00809604	0.197937	ENSSSCG00000003088/ENSSSCG00000006979/ENSSSCG00000011038/ENSSSCG00000014369/ENSSSCG00000024071	5	up
GO:0032465	regulation of cytokinesis	biological_process	4/550	20/12918	4.7	0.0091403	0.200538	ENSSSCG00000012637/ENSSSCG00000018051/ENSSSCG00000026748/ENSSSCG00000037307	4	up&down
GO:0045599	negative regulation of fat cell differentiation	biological_process	5/550	31/12918	3.79	0.00932259	0.200538	ENSSSCG00000003017/ENSSSCG00000016420/ENSSSCG00000026422/ENSSSCG00000035859/ENSSSCG00000039103	5	up
GO:0010759	positive regulation of macrophage chemotaxis	biological_process	3/550	11/12918	6.41	0.00980439	0.200538	ENSSSCG00000029371/ENSSSCG00000035419/Sus_scrofa_newGene_1473	3	up
GO:0031623	receptor internalization	biological_process	3/550	11/12918	6.41	0.00980439	0.200538	ENSSSCG00000008953/ENSSSCG00000012077/ENSSSCG00000015405	3	up&down
GO:0050707	regulation of cytokine secretion	biological_process	3/550	11/12918	6.41	0.00980439	0.200538	ENSSSCG00000009002/ENSSSCG00000011436/ENSSSCG00000012118	3	up
GO:0030335	positive regulation of cell migration	biological_process	11/550	115/12918	2.25	0.00984325	0.200538	ENSSSCG00000003017/ENSSSCG00000006495/ENSSSCG00000010629/ENSSSCG00000014224/ENSSSCG00000015396/ENSSSCG00000015398/ENSSSCG00000022722/ENSSSCG00000023784/ENSSSCG00000026422/ENSSSCG00000035176/ENSSSCG00000035355	11	up&down
GO:0007100	mitotic centrosome separation	biological_process	2/550	4/12918	11.74	0.010253	0.200538	ENSSSCG00000007493/ENSSSCG00000010471	2	down
GO:0010165	response to X-ray	biological_process	2/550	4/12918	11.74	0.010253	0.200538	ENSSSCG00000021702/ENSSSCG00000032315	2	up&down
GO:0031536	positive regulation of exit from mitosis	biological_process	2/550	4/12918	11.74	0.010253	0.200538	ENSSSCG00000024655/ENSSSCG00000040486	2	up&down
GO:0034383	low-density lipoprotein particle clearance	biological_process	2/550	4/12918	11.74	0.010253	0.200538	ENSSSCG00000015405/ENSSSCG00000039103	2	up
GO:0042982	amyloid precursor protein metabolic process	biological_process	2/550	4/12918	11.74	0.010253	0.200538	ENSSSCG00000003088/ENSSSCG00000015287	2	up
GO:0048143	astrocyte activation	biological_process	2/550	4/12918	11.74	0.010253	0.200538	ENSSSCG00000003524/ENSSSCG00000029371	2	up
GO:0050000	chromosome localization	biological_process	2/550	4/12918	11.74	0.010253	0.200538	ENSSSCG00000007351/ENSSSCG00000040486	2	down
GO:0050427	3'-phosphoadenosine 5'-phosphosulfate metabolic process	biological_process	2/550	4/12918	11.74	0.010253	0.200538	ENSSSCG00000032374/ENSSSCG00000033207	2	up
GO:0051303	establishment of chromosome localization	biological_process	2/550	4/12918	11.74	0.010253	0.200538	ENSSSCG00000007351/ENSSSCG00000040486	2	down
GO:0060452	positive regulation of cardiac muscle contraction	biological_process	2/550	4/12918	11.74	0.010253	0.200538	ENSSSCG00000012138/ENSSSCG00000039556	2	up
GO:0060762	regulation of branching involved in mammary gland duct morphogenesis	biological_process	2/550	4/12918	11.74	0.010253	0.200538	ENSSSCG00000024655/ENSSSCG00000035859	2	up
GO:0070086	ubiquitin-dependent endocytosis	biological_process	2/550	4/12918	11.74	0.010253	0.200538	ENSSSCG00000015085/ENSSSCG00000016992	2	up&down
GO:0090037	positive regulation of protein kinase C signaling	biological_process	2/550	4/12918	11.74	0.010253	0.200538	ENSSSCG00000014007/ENSSSCG00000035859	2	up
GO:1904145	negative regulation of meiotic cell cycle process involved in oocyte maturation	biological_process	2/550	4/12918	11.74	0.010253	0.200538	ENSSSCG00000004588/ENSSSCG00000029326	2	down
GO:2000816	negative regulation of mitotic sister chromatid separation	biological_process	2/550	4/12918	11.74	0.010253	0.200538	ENSSSCG00000017032/ENSSSCG00000040486	2	down
GO:1901987	regulation of cell cycle phase transition	biological_process	5/550	32/12918	3.67	0.0106713	0.20675	ENSSSCG00000007351/ENSSSCG00000016658/ENSSSCG00000032652/ENSSSCG00000039283/ENSSSCG00000040486	5	up&down
GO:0007169	transmembrane receptor protein tyrosine kinase signaling pathway	biological_process	8/550	73/12918	2.57	0.0121349	0.216637	ENSSSCG00000008103/ENSSSCG00000010959/ENSSSCG00000014007/ENSSSCG00000016230/ENSSSCG00000017006/ENSSSCG00000018050/ENSSSCG00000025271/ENSSSCG00000038675	8	up&down
GO:0007229	integrin-mediated signaling pathway	biological_process	7/550	59/12918	2.79	0.0122441	0.216637	ENSSSCG00000007754/ENSSSCG00000010772/ENSSSCG00000013041/ENSSSCG00000013553/ENSSSCG00000016855/ENSSSCG00000025133/ENSSSCG00000040575	7	up&down
GO:0043277	apoptotic cell clearance	biological_process	3/550	12/12918	5.87	0.0126645	0.216637	ENSSSCG00000008103/ENSSSCG00000011358/ENSSSCG00000015405	3	up
GO:0090102	cochlea development	biological_process	3/550	12/12918	5.87	0.0126645	0.216637	ENSSSCG00000006051/ENSSSCG00000009486/ENSSSCG00000016230	3	up&down
GO:0006909	phagocytosis	biological_process	5/550	34/12918	3.45	0.0137562	0.216637	ENSSSCG00000000137/ENSSSCG00000008103/ENSSSCG00000013553/ENSSSCG00000015559/ENSSSCG00000039798	5	up
GO:0007200	phospholipase C-activating G-protein coupled receptor signaling pathway	biological_process	4/550	23/12918	4.08	0.0151069	0.216637	ENSSSCG00000007139/ENSSSCG00000009661/ENSSSCG00000011721/ENSSSCG00000029371	4	up&down
GO:0045332	phospholipid translocation	biological_process	3/550	13/12918	5.42	0.0159512	0.216637	ENSSSCG00000013440/ENSSSCG00000023771/ENSSSCG00000035073	3	up&down
GO:1903317	regulation of protein maturation	biological_process	3/550	13/12918	5.42	0.0159512	0.216637	ENSSSCG00000010893/ENSSSCG00000015662/ENSSSCG00000040486	3	up&down
GO:0001523	retinoid metabolic process	biological_process	2/550	5/12918	9.39	0.0166085	0.216637	ENSSSCG00000000362/ENSSSCG00000035419	2	up
GO:0001996	positive regulation of heart rate by epinephrine-norepinephrine	biological_process	2/550	5/12918	9.39	0.0166085	0.216637	ENSSSCG00000007139/ENSSSCG00000009661	2	down
GO:0006032	chitin catabolic process	biological_process	2/550	5/12918	9.39	0.0166085	0.216637	ENSSSCG00000006796/ENSSSCG00000015476	2	up
GO:0006085	acetyl-CoA biosynthetic process	biological_process	2/550	5/12918	9.39	0.0166085	0.216637	ENSSSCG00000007286/ENSSSCG00000017421	2	up
GO:0007096	regulation of exit from mitosis	biological_process	2/550	5/12918	9.39	0.0166085	0.216637	ENSSSCG00000016658/ENSSSCG00000040486	2	down
GO:0010873	positive regulation of cholesterol esterification	biological_process	2/550	5/12918	9.39	0.0166085	0.216637	ENSSSCG00000003088/ENSSSCG00000010184	2	up
GO:0033194	response to hydroperoxide	biological_process	2/550	5/12918	9.39	0.0166085	0.216637	ENSSSCG00000023762/ENSSSCG00000034609	2	up
GO:0034134	toll-like receptor 2 signaling pathway	biological_process	2/550	5/12918	9.39	0.0166085	0.216637	ENSSSCG00000009002/ENSSSCG00000010509	2	up
GO:0035338	long-chain fatty-acyl-CoA biosynthetic process	biological_process	2/550	5/12918	9.39	0.0166085	0.216637	ENSSSCG00000024149/ENSSSCG00000028080	2	up&down
GO:0042220	response to cocaine	biological_process	2/550	5/12918	9.39	0.0166085	0.216637	ENSSSCG00000017121/ENSSSCG00000026850	2	up
GO:0045650	negative regulation of macrophage differentiation	biological_process	2/550	5/12918	9.39	0.0166085	0.216637	ENSSSCG00000038706/ENSSSCG00000039103	2	up
GO:0050994	regulation of lipid catabolic process	biological_process	2/550	5/12918	9.39	0.0166085	0.216637	ENSSSCG00000013056/ENSSSCG00000035419	2	up
GO:0051639	actin filament network formation	biological_process	2/550	5/12918	9.39	0.0166085	0.216637	ENSSSCG00000009412/ENSSSCG00000022722	2	up
GO:0060426	lung vasculature development	biological_process	2/550	5/12918	9.39	0.0166085	0.216637	ENSSSCG00000001909/ENSSSCG00000040961	2	up&down
GO:0071223	cellular response to lipoteichoic acid	biological_process	2/550	5/12918	9.39	0.0166085	0.216637	ENSSSCG00000014369/ENSSSCG00000015405	2	up
GO:1903779	regulation of cardiac conduction	biological_process	2/550	5/12918	9.39	0.0166085	0.216637	ENSSSCG00000010184/ENSSSCG00000012138	2	up
GO:1904668	positive regulation of ubiquitin protein ligase activity	biological_process	2/550	5/12918	9.39	0.0166085	0.216637	ENSSSCG00000003949/ENSSSCG00000026748	2	down
GO:0001934	positive regulation of protein phosphorylation	biological_process	9/550	93/12918	2.27	0.0173593	0.216637	ENSSSCG00000003017/ENSSSCG00000003909/ENSSSCG00000013292/ENSSSCG00000015567/ENSSSCG00000017006/ENSSSCG00000017265/ENSSSCG00000018051/ENSSSCG00000035419/ENSSSCG00000039103	9	up&down
GO:0000278	mitotic cell cycle	biological_process	8/550	78/12918	2.41	0.0176235	0.216637	ENSSSCG00000009671/ENSSSCG00000013545/ENSSSCG00000015581/ENSSSCG00000016658/ENSSSCG00000026748/ENSSSCG00000032315/ENSSSCG00000040486/ENSSSCG00000045632	8	up&down
GO:0071356	cellular response to tumor necrosis factor	biological_process	6/550	50/12918	2.82	0.0188019	0.216637	ENSSSCG00000002866/ENSSSCG00000008953/ENSSSCG00000023915/ENSSSCG00000026422/ENSSSCG00000034722/ENSSSCG00000040681	6	up
GO:0007188	adenylate cyclase-modulating G-protein coupled receptor signaling pathway	biological_process	5/550	37/12918	3.17	0.0194245	0.216637	ENSSSCG00000007139/ENSSSCG00000009661/ENSSSCG00000010629/ENSSSCG00000016403/ENSSSCG00000016672	5	up&down
GO:0061098	positive regulation of protein tyrosine kinase activity	biological_process	3/550	14/12918	5.03	0.0196708	0.216637	ENSSSCG00000010184/ENSSSCG00000016230/ENSSSCG00000017761	3	up&down
GO:0006952	defense response	biological_process	7/550	65/12918	2.53	0.0201192	0.216637	ENSSSCG00000008959/ENSSSCG00000009240/ENSSSCG00000011453/ENSSSCG00000018050/ENSSSCG00000032652/ENSSSCG00000036246/ENSSSCG00000037579	7	up&down
GO:0043491	protein kinase B signaling	biological_process	4/550	25/12918	3.76	0.0201874	0.216637	ENSSSCG00000003017/ENSSSCG00000003909/ENSSSCG00000008103/ENSSSCG00000017607	4	up&down
GO:0051897	positive regulation of protein kinase B signaling	biological_process	6/550	52/12918	2.71	0.0224432	0.216637	ENSSSCG00000003017/ENSSSCG00000003333/ENSSSCG00000009237/ENSSSCG00000010772/ENSSSCG00000015476/ENSSSCG00000027272	6	up
GO:0032760	positive regulation of tumor necrosis factor production	biological_process	4/550	26/12918	3.61	0.0230765	0.216637	ENSSSCG00000012652/ENSSSCG00000014369/ENSSSCG00000015405/ENSSSCG00000015801	4	up&down
GO:0002755	MyD88-dependent toll-like receptor signaling pathway	biological_process	3/550	15/12918	4.7	0.0238264	0.216637	ENSSSCG00000009002/ENSSSCG00000011436/ENSSSCG00000012118	3	up
GO:0007422	peripheral nervous system development	biological_process	3/550	15/12918	4.7	0.0238264	0.216637	ENSSSCG00000009477/ENSSSCG00000026850/ENSSSCG00000034167	3	up
GO:0045907	positive regulation of vasoconstriction	biological_process	3/550	15/12918	4.7	0.0238264	0.216637	ENSSSCG00000007139/ENSSSCG00000009661/ENSSSCG00000035355	3	up&down
GO:0071880	adenylate cyclase-activating adrenergic receptor signaling pathway	biological_process	3/550	15/12918	4.7	0.0238264	0.216637	ENSSSCG00000007139/ENSSSCG00000009661/ENSSSCG00000010629	3	up&down
GO:0090307	mitotic spindle assembly	biological_process	3/550	15/12918	4.7	0.0238264	0.216637	ENSSSCG00000001510/ENSSSCG00000010471/ENSSSCG00000040486	3	down
GO:0001774	microglial cell activation	biological_process	2/550	6/12918	7.83	0.0242157	0.216637	ENSSSCG00000003524/ENSSSCG00000029371	2	up
GO:0002790	peptide secretion	biological_process	2/550	6/12918	7.83	0.0242157	0.216637	ENSSSCG00000017006/ENSSSCG00000026850	2	up
GO:0003139	secondary heart field specification	biological_process	2/550	6/12918	7.83	0.0242157	0.216637	ENSSSCG00000017265/ENSSSCG00000035859	2	up
GO:0006707	cholesterol catabolic process	biological_process	2/550	6/12918	7.83	0.0242157	0.216637	ENSSSCG00000003088/ENSSSCG00000016199	2	up
GO:0006751	glutathione catabolic process	biological_process	2/550	6/12918	7.83	0.0242157	0.216637	ENSSSCG00000010055/ENSSSCG00000010056	2	up
GO:0007263	nitric oxide mediated signal transduction	biological_process	2/550	6/12918	7.83	0.0242157	0.216637	ENSSSCG00000003088/ENSSSCG00000015405	2	up
GO:0030212	hyaluronan metabolic process	biological_process	2/550	6/12918	7.83	0.0242157	0.216637	ENSSSCG00000011129/ENSSSCG00000011451	2	up
GO:0031115	negative regulation of microtubule polymerization	biological_process	2/550	6/12918	7.83	0.0242157	0.216637	ENSSSCG00000006160/ENSSSCG00000013545	2	up&down
GO:0033601	positive regulation of mammary gland epithelial cell proliferation	biological_process	2/550	6/12918	7.83	0.0242157	0.216637	ENSSSCG00000006475/ENSSSCG00000011386	2	up&down
GO:0034162	toll-like receptor 9 signaling pathway	biological_process	2/550	6/12918	7.83	0.0242157	0.216637	ENSSSCG00000010509/ENSSSCG00000011436	2	up
GO:0045741	positive regulation of epidermal growth factor-activated receptor activity	biological_process	2/550	6/12918	7.83	0.0242157	0.216637	ENSSSCG00000008965/ENSSSCG00000010629	2	up
GO:0051923	sulfation	biological_process	2/550	6/12918	7.83	0.0242157	0.216637	ENSSSCG00000032374/ENSSSCG00000033207	2	up
GO:0060068	vagina development	biological_process	2/550	6/12918	7.83	0.0242157	0.216637	ENSSSCG00000008103/ENSSSCG00000035859	2	up
GO:0061029	eyelid development in camera-type eye	biological_process	2/550	6/12918	7.83	0.0242157	0.216637	ENSSSCG00000001909/ENSSSCG00000008649	2	up&down
GO:0061640	cytoskeleton-dependent cytokinesis	biological_process	2/550	6/12918	7.83	0.0242157	0.216637	ENSSSCG00000016658/ENSSSCG00000040486	2	down
GO:0071285	cellular response to lithium ion	biological_process	2/550	6/12918	7.83	0.0242157	0.216637	ENSSSCG00000002866/ENSSSCG00000040681	2	up
GO:1904706	negative regulation of vascular smooth muscle cell proliferation	biological_process	2/550	6/12918	7.83	0.0242157	0.216637	ENSSSCG00000026422/ENSSSCG00000039103	2	up
GO:0045766	positive regulation of angiogenesis	biological_process	6/550	54/12918	2.61	0.0265315	0.216637	ENSSSCG00000008953/ENSSSCG00000015476/ENSSSCG00000015801/ENSSSCG00000029371/ENSSSCG00000035859/Sus_scrofa_newGene_1473	6	up&down
GO:0007205	protein kinase C-activating G-protein coupled receptor signaling pathway	biological_process	3/550	16/12918	4.4	0.0284181	0.216637	ENSSSCG00000015355/ENSSSCG00000035355/ENSSSCG00000040581	3	up
GO:0008202	steroid metabolic process	biological_process	3/550	16/12918	4.4	0.0284181	0.216637	ENSSSCG00000000362/ENSSSCG00000000419/ENSSSCG00000033207	3	up
GO:0007093	mitotic cell cycle checkpoint	biological_process	4/550	28/12918	3.36	0.0295736	0.216637	ENSSSCG00000003017/ENSSSCG00000027984/ENSSSCG00000039546/ENSSSCG00000040486	4	up&down
GO:0030324	lung development	biological_process	5/550	42/12918	2.8	0.0319135	0.216637	ENSSSCG00000002866/ENSSSCG00000006013/ENSSSCG00000015476/ENSSSCG00000015616/ENSSSCG00000035859	5	up
GO:0032496	response to lipopolysaccharide	biological_process	5/550	42/12918	2.8	0.0319135	0.216637	ENSSSCG00000004898/ENSSSCG00000010831/ENSSSCG00000012409/ENSSSCG00000035355/ENSSSCG00000039798	5	up
GO:0001964	startle response	biological_process	2/550	7/12918	6.71	0.0329569	0.216637	ENSSSCG00000009486/ENSSSCG00000032722	2	up&down
GO:0007035	vacuolar acidification	biological_process	2/550	7/12918	6.71	0.0329569	0.216637	ENSSSCG00000016516/ENSSSCG00000039798	2	up
GO:0030071	regulation of mitotic metaphase/anaphase transition	biological_process	2/550	7/12918	6.71	0.0329569	0.216637	ENSSSCG00000023296/ENSSSCG00000040486	2	down
GO:0035457	cellular response to interferon-alpha	biological_process	2/550	7/12918	6.71	0.0329569	0.216637	ENSSSCG00000010451/ENSSSCG00000010452	2	down
GO:0042953	lipoprotein transport	biological_process	2/550	7/12918	6.71	0.0329569	0.216637	ENSSSCG00000015405/ENSSSCG00000017761	2	up
GO:0051764	actin crosslink formation	biological_process	2/550	7/12918	6.71	0.0329569	0.216637	ENSSSCG00000000111/ENSSSCG00000032341	2	up
GO:1902808	positive regulation of cell cycle G1/S phase transition	biological_process	2/550	7/12918	6.71	0.0329569	0.216637	ENSSSCG00000007351/ENSSSCG00000024655	2	up&down
GO:2000257	regulation of protein activation cascade	biological_process	2/550	7/12918	6.71	0.0329569	0.216637	ENSSSCG00000010893/ENSSSCG00000015662	2	up
GO:2001023	regulation of response to drug	biological_process	2/550	7/12918	6.71	0.0329569	0.216637	ENSSSCG00000026850/ENSSSCG00000037918	2	up
GO:0008203	cholesterol metabolic process	biological_process	4/550	29/12918	3.24	0.0331876	0.216637	ENSSSCG00000002866/ENSSSCG00000003018/ENSSSCG00000016199/ENSSSCG00000025020	4	up
GO:0032729	positive regulation of interferon-gamma production	biological_process	4/550	29/12918	3.24	0.0331876	0.216637	ENSSSCG00000012652/ENSSSCG00000014369/ENSSSCG00000035859/ENSSSCG00000039798	4	up
GO:0002931	response to ischemia	biological_process	3/550	17/12918	4.14	0.0334432	0.216637	ENSSSCG00000004366/ENSSSCG00000014336/ENSSSCG00000022945	3	up&down
GO:0007009	plasma membrane organization	biological_process	3/550	17/12918	4.14	0.0334432	0.216637	ENSSSCG00000000111/ENSSSCG00000005975/ENSSSCG00000040205	3	up
GO:0070613	regulation of protein processing	biological_process	3/550	17/12918	4.14	0.0334432	0.216637	ENSSSCG00000010893/ENSSSCG00000015662/ENSSSCG00000040486	3	up&down
GO:0030593	neutrophil chemotaxis	biological_process	4/550	30/12918	3.13	0.0370479	0.216637	ENSSSCG00000008953/ENSSSCG00000013553/ENSSSCG00000029371/ENSSSCG00000034722	4	up
GO:0043406	positive regulation of MAP kinase activity	biological_process	4/550	30/12918	3.13	0.0370479	0.216637	ENSSSCG00000003017/ENSSSCG00000010629/ENSSSCG00000010772/ENSSSCG00000027272	4	up
GO:0000132	establishment of mitotic spindle orientation	biological_process	3/550	18/12918	3.91	0.0388969	0.216637	ENSSSCG00000026748/ENSSSCG00000032279/ENSSSCG00000038543	3	down
GO:0008045	motor neuron axon guidance	biological_process	3/550	18/12918	3.91	0.0388969	0.216637	ENSSSCG00000015398/ENSSSCG00000016230/ENSSSCG00000021944	3	up&down
GO:0001578	microtubule bundle formation	biological_process	4/550	31/12918	3.03	0.0411553	0.216637	ENSSSCG00000012584/ENSSSCG00000023479/ENSSSCG00000026748/ENSSSCG00000037307	4	up&down
GO:0000821	regulation of arginine metabolic process	biological_process	1/550	1/12918	23.49	0.0425763	0.216637	ENSSSCG00000002041	1	up
GO:0000921	septin ring assembly	biological_process	1/550	1/12918	23.49	0.0425763	0.216637	ENSSSCG00000016658	1	down
GO:0001887	selenium compound metabolic process	biological_process	1/550	1/12918	23.49	0.0425763	0.216637	ENSSSCG00000021208	1	up
GO:0001985	negative regulation of heart rate involved in baroreceptor response to increased systemic arterial blood pressure	biological_process	1/550	1/12918	23.49	0.0425763	0.216637	ENSSSCG00000009661	1	down
GO:0002344	B cell affinity maturation	biological_process	1/550	1/12918	23.49	0.0425763	0.216637	ENSSSCG00000026742	1	up
GO:0002379	immunoglobulin biosynthetic process involved in immune response	biological_process	1/550	1/12918	23.49	0.0425763	0.216637	ENSSSCG00000011358	1	up
GO:0002383	immune response in brain or nervous system	biological_process	1/550	1/12918	23.49	0.0425763	0.216637	ENSSSCG00000011358	1	up
GO:0002606	positive regulation of dendritic cell antigen processing and presentation	biological_process	1/550	1/12918	23.49	0.0425763	0.216637	ENSSSCG00000039798	1	up
GO:0002617	negative regulation of macrophage antigen processing and presentation	biological_process	1/550	1/12918	23.49	0.0425763	0.216637	ENSSSCG00000015413	1	up
GO:0002637	regulation of immunoglobulin production	biological_process	1/550	1/12918	23.49	0.0425763	0.216637	ENSSSCG00000011358	1	up
GO:0002664	regulation of T cell tolerance induction	biological_process	1/550	1/12918	23.49	0.0425763	0.216637	ENSSSCG00000022849	1	up
GO:0002712	regulation of B cell mediated immunity	biological_process	1/550	1/12918	23.49	0.0425763	0.216637	ENSSSCG00000015662	1	up
GO:0002713	negative regulation of B cell mediated immunity	biological_process	1/550	1/12918	23.49	0.0425763	0.216637	ENSSSCG00000015662	1	up
GO:0002730	regulation of dendritic cell cytokine production	biological_process	1/550	1/12918	23.49	0.0425763	0.216637	ENSSSCG00000015801	1	down
GO:0002823	negative regulation of adaptive immune response based on somatic recombination of immune receptors built from immunoglobulin superfamily domains	biological_process	1/550	1/12918	23.49	0.0425763	0.216637	ENSSSCG00000015662	1	up
GO:0002889	regulation of immunoglobulin mediated immune response	biological_process	1/550	1/12918	23.49	0.0425763	0.216637	ENSSSCG00000015662	1	up
GO:0002890	negative regulation of immunoglobulin mediated immune response	biological_process	1/550	1/12918	23.49	0.0425763	0.216637	ENSSSCG00000015662	1	up
GO:0002923	regulation of humoral immune response mediated by circulating immunoglobulin	biological_process	1/550	1/12918	23.49	0.0425763	0.216637	ENSSSCG00000015662	1	up
GO:0003051	angiotensin-mediated drinking behavior	biological_process	1/550	1/12918	23.49	0.0425763	0.216637	ENSSSCG00000012138	1	up
GO:0003105	negative regulation of glomerular filtration	biological_process	1/550	1/12918	23.49	0.0425763	0.216637	ENSSSCG00000035355	1	up
GO:0003138	primary heart field specification	biological_process	1/550	1/12918	23.49	0.0425763	0.216637	ENSSSCG00000035859	1	up
GO:0003228	atrial cardiac muscle tissue development	biological_process	1/550	1/12918	23.49	0.0425763	0.216637	ENSSSCG00000011358	1	up
GO:0003404	optic vesicle morphogenesis	biological_process	1/550	1/12918	23.49	0.0425763	0.216637	ENSSSCG00000039283	1	up
GO:0006020	inositol metabolic process	biological_process	1/550	1/12918	23.49	0.0425763	0.216637	ENSSSCG00000034167	1	up
GO:0006198	cAMP catabolic process	biological_process	1/550	1/12918	23.49	0.0425763	0.216637	ENSSSCG00000003805	1	up
GO:0006876	cellular cadmium ion homeostasis	biological_process	1/550	1/12918	23.49	0.0425763	0.216637	ENSSSCG00000039798	1	up
GO:0006957	complement activation, alternative pathway	biological_process	1/550	1/12918	23.49	0.0425763	0.216637	ENSSSCG00000013418	1	up
GO:0007497	posterior midgut development	biological_process	1/550	1/12918	23.49	0.0425763	0.216637	ENSSSCG00000009477	1	up
GO:0007529	establishment of synaptic specificity at neuromuscular junction	biological_process	1/550	1/12918	23.49	0.0425763	0.216637	ENSSSCG00000035355	1	up
GO:0009086	methionine biosynthetic process	biological_process	1/550	1/12918	23.49	0.0425763	0.216637	ENSSSCG00000014108	1	down
GO:0009812	flavonoid metabolic process	biological_process	1/550	1/12918	23.49	0.0425763	0.216637	ENSSSCG00000032374	1	up
GO:0009946	proximal/distal axis specification	biological_process	1/550	1/12918	23.49	0.0425763	0.216637	ENSSSCG00000039283	1	up
GO:0010021	amylopectin biosynthetic process	biological_process	1/550	1/12918	23.49	0.0425763	0.216637	ENSSSCG00000023915	1	up
GO:0010124	phenylacetate catabolic process	biological_process	1/550	1/12918	23.49	0.0425763	0.216637	ENSSSCG00000011250	1	up
GO:0010189	vitamin E biosynthetic process	biological_process	1/550	1/12918	23.49	0.0425763	0.216637	ENSSSCG00000007435	1	up
GO:0010877	lipid transport involved in lipid storage	biological_process	1/550	1/12918	23.49	0.0425763	0.216637	ENSSSCG00000003088	1	up
GO:0015707	nitrite transport	biological_process	1/550	1/12918	23.49	0.0425763	0.216637	ENSSSCG00000039798	1	up
GO:0015798	myo-inositol transport	biological_process	1/550	1/12918	23.49	0.0425763	0.216637	ENSSSCG00000034167	1	up
GO:0015827	tryptophan transport	biological_process	1/550	1/12918	23.49	0.0425763	0.216637	ENSSSCG00000012138	1	up
GO:0015837	amine transport	biological_process	1/550	1/12918	23.49	0.0425763	0.216637	ENSSSCG00000004597	1	up
GO:0016077	snoRNA catabolic process	biological_process	1/550	1/12918	23.49	0.0425763	0.216637	ENSSSCG00000032424	1	up
GO:0018094	protein polyglycylation	biological_process	1/550	1/12918	23.49	0.0425763	0.216637	ENSSSCG00000011553	1	up
GO:0019074	viral RNA genome packaging	biological_process	1/550	1/12918	23.49	0.0425763	0.216637	ENSSSCG00000012926	1	up
GO:0019732	antifungal humoral response	biological_process	1/550	1/12918	23.49	0.0425763	0.216637	ENSSSCG00000035419	1	up
GO:0021828	gonadotrophin-releasing hormone neuronal migration to the hypothalamus	biological_process	1/550	1/12918	23.49	0.0425763	0.216637	ENSSSCG00000015398	1	down
GO:0030450	regulation of complement activation, classical pathway	biological_process	1/550	1/12918	23.49	0.0425763	0.216637	ENSSSCG00000015662	1	up
GO:0031106	septin ring organization	biological_process	1/550	1/12918	23.49	0.0425763	0.216637	ENSSSCG00000016658	1	down
GO:0031394	positive regulation of prostaglandin biosynthetic process	biological_process	1/550	1/12918	23.49	0.0425763	0.216637	ENSSSCG00000015579	1	up
GO:0032423	regulation of mismatch repair	biological_process	1/550	1/12918	23.49	0.0425763	0.216637	ENSSSCG00000017265	1	up
GO:0032632	interleukin-3 production	biological_process	1/550	1/12918	23.49	0.0425763	0.216637	ENSSSCG00000039798	1	up
GO:0032802	low-density lipoprotein particle receptor catabolic process	biological_process	1/550	1/12918	23.49	0.0425763	0.216637	ENSSSCG00000025020	1	up
GO:0033034	positive regulation of myeloid cell apoptotic process	biological_process	1/550	1/12918	23.49	0.0425763	0.216637	ENSSSCG00000039103	1	up
GO:0033316	meiotic spindle assembly checkpoint	biological_process	1/550	1/12918	23.49	0.0425763	0.216637	ENSSSCG00000004466	1	down
GO:0034157	positive regulation of toll-like receptor 7 signaling pathway	biological_process	1/550	1/12918	23.49	0.0425763	0.216637	ENSSSCG00000008648	1	down
GO:0034158	toll-like receptor 8 signaling pathway	biological_process	1/550	1/12918	23.49	0.0425763	0.216637	ENSSSCG00000012118	1	up
GO:0034165	positive regulation of toll-like receptor 9 signaling pathway	biological_process	1/550	1/12918	23.49	0.0425763	0.216637	ENSSSCG00000008648	1	down
GO:0034197	triglyceride transport	biological_process	1/550	1/12918	23.49	0.0425763	0.216637	ENSSSCG00000015405	1	up
GO:0034346	positive regulation of type III interferon production	biological_process	1/550	1/12918	23.49	0.0425763	0.216637	ENSSSCG00000015801	1	down
GO:0034382	chylomicron remnant clearance	biological_process	1/550	1/12918	23.49	0.0425763	0.216637	ENSSSCG00000003088	1	up
GO:0034447	very-low-density lipoprotein particle clearance	biological_process	1/550	1/12918	23.49	0.0425763	0.216637	ENSSSCG00000003088	1	up
GO:0034661	ncRNA catabolic process	biological_process	1/550	1/12918	23.49	0.0425763	0.216637	ENSSSCG00000032652	1	down
GO:0035332	positive regulation of hippo signaling	biological_process	1/550	1/12918	23.49	0.0425763	0.216637	ENSSSCG00000008649	1	up
GO:0035645	enteric smooth muscle cell differentiation	biological_process	1/550	1/12918	23.49	0.0425763	0.216637	ENSSSCG00000009477	1	up
GO:0035781	CD86 biosynthetic process	biological_process	1/550	1/12918	23.49	0.0425763	0.216637	ENSSSCG00000011358	1	up
GO:0036003	positive regulation of transcription from RNA polymerase II promoter in response to stress	biological_process	1/550	1/12918	23.49	0.0425763	0.216637	ENSSSCG00000038911	1	up
GO:0036153	triglyceride acyl-chain remodeling	biological_process	1/550	1/12918	23.49	0.0425763	0.216637	ENSSSCG00000027266	1	up
GO:0036276	response to antidepressant	biological_process	1/550	1/12918	23.49	0.0425763	0.216637	ENSSSCG00000026850	1	up
GO:0036316	SREBP-SCAP complex retention in endoplasmic reticulum	biological_process	1/550	1/12918	23.49	0.0425763	0.216637	ENSSSCG00000016420	1	up
GO:0036378	calcitriol biosynthetic process from calciol	biological_process	1/550	1/12918	23.49	0.0425763	0.216637	ENSSSCG00000016199	1	up
GO:0036517	chemoattraction of serotonergic neuron axon	biological_process	1/550	1/12918	23.49	0.0425763	0.216637	ENSSSCG00000035859	1	up
GO:0043585	nose morphogenesis	biological_process	1/550	1/12918	23.49	0.0425763	0.216637	ENSSSCG00000001909	1	down
GO:0044381	glucose import in response to insulin stimulus	biological_process	1/550	1/12918	23.49	0.0425763	0.216637	ENSSSCG00000023915	1	up
GO:0044539	long-chain fatty acid import	biological_process	1/550	1/12918	23.49	0.0425763	0.216637	ENSSSCG00000015405	1	up
GO:0045091	regulation of single stranded viral RNA replication via double stranded DNA intermediate	biological_process	1/550	1/12918	23.49	0.0425763	0.216637	ENSSSCG00000008953	1	up
GO:0045342	MHC class II biosynthetic process	biological_process	1/550	1/12918	23.49	0.0425763	0.216637	ENSSSCG00000039798	1	up
GO:0045356	positive regulation of interferon-alpha biosynthetic process	biological_process	1/550	1/12918	23.49	0.0425763	0.216637	ENSSSCG00000015801	1	down
GO:0045659	negative regulation of neutrophil differentiation	biological_process	1/550	1/12918	23.49	0.0425763	0.216637	ENSSSCG00000016298	1	up
GO:0045687	positive regulation of glial cell differentiation	biological_process	1/550	1/12918	23.49	0.0425763	0.216637	ENSSSCG00000034609	1	up
GO:0045715	negative regulation of low-density lipoprotein particle receptor biosynthetic process	biological_process	1/550	1/12918	23.49	0.0425763	0.216637	ENSSSCG00000039103	1	up
GO:0045769	negative regulation of asymmetric cell division	biological_process	1/550	1/12918	23.49	0.0425763	0.216637	ENSSSCG00000010896	1	down
GO:0046340	diacylglycerol catabolic process	biological_process	1/550	1/12918	23.49	0.0425763	0.216637	ENSSSCG00000003018	1	up
GO:0046449	creatinine metabolic process	biological_process	1/550	1/12918	23.49	0.0425763	0.216637	ENSSSCG00000011723	1	up
GO:0046602	regulation of mitotic centrosome separation	biological_process	1/550	1/12918	23.49	0.0425763	0.216637	ENSSSCG00000010471	1	down
GO:0046709	IDP catabolic process	biological_process	1/550	1/12918	23.49	0.0425763	0.216637	ENSSSCG00000032424	1	up
GO:0048520	positive regulation of behavior	biological_process	1/550	1/12918	23.49	0.0425763	0.216637	ENSSSCG00000001909	1	down
GO:0048659	smooth muscle cell proliferation	biological_process	1/550	1/12918	23.49	0.0425763	0.216637	ENSSSCG00000006002	1	up
GO:0048861	leukemia inhibitory factor signaling pathway	biological_process	1/550	1/12918	23.49	0.0425763	0.216637	ENSSSCG00000040961	1	up
GO:0051081	nuclear envelope disassembly	biological_process	1/550	1/12918	23.49	0.0425763	0.216637	ENSSSCG00000026748	1	down
GO:0051307	meiotic chromosome separation	biological_process	1/550	1/12918	23.49	0.0425763	0.216637	ENSSSCG00000000265	1	down
GO:0055062	phosphate ion homeostasis	biological_process	1/550	1/12918	23.49	0.0425763	0.216637	ENSSSCG00000035299	1	down
GO:0055096	low-density lipoprotein particle mediated signaling	biological_process	1/550	1/12918	23.49	0.0425763	0.216637	ENSSSCG00000015405	1	up
GO:0060007	linear vestibuloocular reflex	biological_process	1/550	1/12918	23.49	0.0425763	0.216637	ENSSSCG00000009486	1	up
GO:0060157	urinary bladder development	biological_process	1/550	1/12918	23.49	0.0425763	0.216637	ENSSSCG00000035859	1	up
GO:0060266	negative regulation of respiratory burst involved in inflammatory response	biological_process	1/550	1/12918	23.49	0.0425763	0.216637	ENSSSCG00000010831	1	up
GO:0060312	regulation of blood vessel remodeling	biological_process	1/550	1/12918	23.49	0.0425763	0.216637	ENSSSCG00000014007	1	up
GO:0060599	lateral sprouting involved in mammary gland duct morphogenesis	biological_process	1/550	1/12918	23.49	0.0425763	0.216637	ENSSSCG00000035859	1	up
GO:0060668	regulation of branching involved in salivary gland morphogenesis by extracellular matrix-epithelial cell signaling	biological_process	1/550	1/12918	23.49	0.0425763	0.216637	ENSSSCG00000000896	1	down
GO:0060775	planar cell polarity pathway involved in gastrula mediolateral intercalation	biological_process	1/550	1/12918	23.49	0.0425763	0.216637	ENSSSCG00000035859	1	up
GO:0061049	cell growth involved in cardiac muscle cell development	biological_process	1/550	1/12918	23.49	0.0425763	0.216637	ENSSSCG00000009661	1	down
GO:0061143	alveolar primary septum development	biological_process	1/550	1/12918	23.49	0.0425763	0.216637	ENSSSCG00000001909	1	down
GO:0061182	negative regulation of chondrocyte development	biological_process	1/550	1/12918	23.49	0.0425763	0.216637	ENSSSCG00000038618	1	down
GO:0061347	planar cell polarity pathway involved in outflow tract morphogenesis	biological_process	1/550	1/12918	23.49	0.0425763	0.216637	ENSSSCG00000035859	1	up
GO:0061348	planar cell polarity pathway involved in ventricular septum morphogenesis	biological_process	1/550	1/12918	23.49	0.0425763	0.216637	ENSSSCG00000035859	1	up
GO:0061349	planar cell polarity pathway involved in cardiac right atrium morphogenesis	biological_process	1/550	1/12918	23.49	0.0425763	0.216637	ENSSSCG00000035859	1	up
GO:0061350	planar cell polarity pathway involved in cardiac muscle tissue morphogenesis	biological_process	1/550	1/12918	23.49	0.0425763	0.216637	ENSSSCG00000035859	1	up
GO:0061354	planar cell polarity pathway involved in pericardium morphogenesis	biological_process	1/550	1/12918	23.49	0.0425763	0.216637	ENSSSCG00000035859	1	up
GO:0061386	closure of optic fissure	biological_process	1/550	1/12918	23.49	0.0425763	0.216637	ENSSSCG00000008649	1	up
GO:0061771	response to caloric restriction	biological_process	1/550	1/12918	23.49	0.0425763	0.216637	ENSSSCG00000003088	1	up
GO:0061837	neuropeptide processing	biological_process	1/550	1/12918	23.49	0.0425763	0.216637	ENSSSCG00000011723	1	up
GO:0070194	synaptonemal complex disassembly	biological_process	1/550	1/12918	23.49	0.0425763	0.216637	ENSSSCG00000026748	1	down
GO:0070256	negative regulation of mucus secretion	biological_process	1/550	1/12918	23.49	0.0425763	0.216637	ENSSSCG00000021059	1	up
GO:0070474	positive regulation of uterine smooth muscle contraction	biological_process	1/550	1/12918	23.49	0.0425763	0.216637	ENSSSCG00000026422	1	up
GO:0070493	thrombin-activated receptor signaling pathway	biological_process	1/550	1/12918	23.49	0.0425763	0.216637	ENSSSCG00000035355	1	up
GO:0070543	response to linoleic acid	biological_process	1/550	1/12918	23.49	0.0425763	0.216637	ENSSSCG00000015405	1	up
GO:0070669	response to interleukin-2	biological_process	1/550	1/12918	23.49	0.0425763	0.216637	ENSSSCG00000012409	1	up
GO:0070839	divalent metal ion export	biological_process	1/550	1/12918	23.49	0.0425763	0.216637	ENSSSCG00000039798	1	up
GO:0070862	negative regulation of protein exit from endoplasmic reticulum	biological_process	1/550	1/12918	23.49	0.0425763	0.216637	ENSSSCG00000016420	1	up
GO:0070981	L-asparagine biosynthetic process	biological_process	1/550	1/12918	23.49	0.0425763	0.216637	ENSSSCG00000015340	1	down
GO:0070994	detection of oxidative stress	biological_process	1/550	1/12918	23.49	0.0425763	0.216637	ENSSSCG00000039103	1	up
GO:0071104	response to interleukin-9	biological_process	1/550	1/12918	23.49	0.0425763	0.216637	ENSSSCG00000012409	1	up
GO:0071357	cellular response to type I interferon	biological_process	1/550	1/12918	23.49	0.0425763	0.216637	ENSSSCG00000012077	1	down
GO:0071462	cellular response to water stimulus	biological_process	1/550	1/12918	23.49	0.0425763	0.216637	ENSSSCG00000026850	1	up
GO:0071471	cellular response to non-ionic osmotic stress	biological_process	1/550	1/12918	23.49	0.0425763	0.216637	ENSSSCG00000015579	1	up
GO:0071673	positive regulation of smooth muscle cell chemotaxis	biological_process	1/550	1/12918	23.49	0.0425763	0.216637	ENSSSCG00000032341	1	up
GO:0071831	intermediate-density lipoprotein particle clearance	biological_process	1/550	1/12918	23.49	0.0425763	0.216637	ENSSSCG00000003088	1	up
GO:0071846	actin filament debranching	biological_process	1/550	1/12918	23.49	0.0425763	0.216637	ENSSSCG00000040981	1	up
GO:0071881	adenylate cyclase-inhibiting adrenergic receptor signaling pathway	biological_process	1/550	1/12918	23.49	0.0425763	0.216637	ENSSSCG00000010629	1	up
GO:0071882	phospholipase C-activating adrenergic receptor signaling pathway	biological_process	1/550	1/12918	23.49	0.0425763	0.216637	ENSSSCG00000010629	1	up
GO:0071932	replication fork reversal	biological_process	1/550	1/12918	23.49	0.0425763	0.216637	ENSSSCG00000005000	1	down
GO:0072394	detection of stimulus involved in cell cycle checkpoint	biological_process	1/550	1/12918	23.49	0.0425763	0.216637	ENSSSCG00000011358	1	up
GO:0072421	detection of DNA damage stimulus involved in DNA damage checkpoint	biological_process	1/550	1/12918	23.49	0.0425763	0.216637	ENSSSCG00000011358	1	up
GO:0090075	relaxation of muscle	biological_process	1/550	1/12918	23.49	0.0425763	0.216637	ENSSSCG00000011721	1	up
GO:0090285	negative regulation of protein glycosylation in Golgi	biological_process	1/550	1/12918	23.49	0.0425763	0.216637	ENSSSCG00000034213	1	up
GO:0090361	regulation of platelet-derived growth factor production	biological_process	1/550	1/12918	23.49	0.0425763	0.216637	ENSSSCG00000030309	1	up
GO:0097156	fasciculation of motor neuron axon	biological_process	1/550	1/12918	23.49	0.0425763	0.216637	ENSSSCG00000016230	1	down
GO:0097195	pilomotor reflex	biological_process	1/550	1/12918	23.49	0.0425763	0.216637	ENSSSCG00000009661	1	down
GO:0097281	immune complex formation	biological_process	1/550	1/12918	23.49	0.0425763	0.216637	ENSSSCG00000011358	1	up
GO:0097533	cellular stress response to acid chemical	biological_process	1/550	1/12918	23.49	0.0425763	0.216637	ENSSSCG00000038911	1	up
GO:0098038	non-replicative transposition, DNA-mediated	biological_process	1/550	1/12918	23.49	0.0425763	0.216637	ENSSSCG00000021027	1	up
GO:0098725	symmetric cell division	biological_process	1/550	1/12918	23.49	0.0425763	0.216637	ENSSSCG00000032279	1	down
GO:0098759	cellular response to interleukin-8	biological_process	1/550	1/12918	23.49	0.0425763	0.216637	ENSSSCG00000014336	1	up
GO:0098884	postsynaptic neurotransmitter receptor internalization	biological_process	1/550	1/12918	23.49	0.0425763	0.216637	ENSSSCG00000012077	1	down
GO:0098914	membrane repolarization during atrial cardiac muscle cell action potential	biological_process	1/550	1/12918	23.49	0.0425763	0.216637	ENSSSCG00000039556	1	up
GO:0099040	ceramide translocation	biological_process	1/550	1/12918	23.49	0.0425763	0.216637	ENSSSCG00000035073	1	down
GO:0099606	microtubule plus-end directed mitotic chromosome migration	biological_process	1/550	1/12918	23.49	0.0425763	0.216637	ENSSSCG00000023296	1	down
GO:0099607	lateral attachment of mitotic spindle microtubules to kinetochore	biological_process	1/550	1/12918	23.49	0.0425763	0.216637	ENSSSCG00000023296	1	down
GO:0140074	cardiac endothelial to mesenchymal transition	biological_process	1/550	1/12918	23.49	0.0425763	0.216637	ENSSSCG00000023784	1	down
GO:1900108	negative regulation of nodal signaling pathway	biological_process	1/550	1/12918	23.49	0.0425763	0.216637	ENSSSCG00000031703	1	up
GO:1900134	negative regulation of renin secretion into blood stream	biological_process	1/550	1/12918	23.49	0.0425763	0.216637	ENSSSCG00000035355	1	up
GO:1900158	negative regulation of bone mineralization involved in bone maturation	biological_process	1/550	1/12918	23.49	0.0425763	0.216637	ENSSSCG00000038618	1	down
GO:1900453	negative regulation of long term synaptic depression	biological_process	1/550	1/12918	23.49	0.0425763	0.216637	ENSSSCG00000021059	1	up
GO:1901076	positive regulation of engulfment of apoptotic cell	biological_process	1/550	1/12918	23.49	0.0425763	0.216637	ENSSSCG00000039270	1	up
GO:1901253	negative regulation of intracellular transport of viral material	biological_process	1/550	1/12918	23.49	0.0425763	0.216637	ENSSSCG00000012077	1	down
GO:1901303	negative regulation of cargo loading into COPII-coated vesicle	biological_process	1/550	1/12918	23.49	0.0425763	0.216637	ENSSSCG00000016420	1	up
GO:1901639	XDP catabolic process	biological_process	1/550	1/12918	23.49	0.0425763	0.216637	ENSSSCG00000032424	1	up
GO:1901676	positive regulation of histone H3-K27 acetylation	biological_process	1/550	1/12918	23.49	0.0425763	0.216637	ENSSSCG00000040961	1	up
GO:1901723	negative regulation of cell proliferation involved in kidney development	biological_process	1/550	1/12918	23.49	0.0425763	0.216637	ENSSSCG00000018051	1	up
GO:1901856	negative regulation of cellular respiration	biological_process	1/550	1/12918	23.49	0.0425763	0.216637	ENSSSCG00000018051	1	up
GO:1901859	negative regulation of mitochondrial DNA metabolic process	biological_process	1/550	1/12918	23.49	0.0425763	0.216637	ENSSSCG00000018051	1	up
GO:1902023	L-arginine transport	biological_process	1/550	1/12918	23.49	0.0425763	0.216637	ENSSSCG00000039798	1	up
GO:1902480	protein localization to mitotic spindle	biological_process	1/550	1/12918	23.49	0.0425763	0.216637	ENSSSCG00000007351	1	down
GO:1902490	regulation of sperm capacitation	biological_process	1/550	1/12918	23.49	0.0425763	0.216637	ENSSSCG00000001535	1	up
GO:1902952	positive regulation of dendritic spine maintenance	biological_process	1/550	1/12918	23.49	0.0425763	0.216637	ENSSSCG00000003088	1	up
GO:1903002	positive regulation of lipid transport across blood brain barrier	biological_process	1/550	1/12918	23.49	0.0425763	0.216637	ENSSSCG00000003088	1	up
GO:1903045	neural crest cell migration involved in sympathetic nervous system development	biological_process	1/550	1/12918	23.49	0.0425763	0.216637	ENSSSCG00000015398	1	down
GO:1903060	negative regulation of protein lipidation	biological_process	1/550	1/12918	23.49	0.0425763	0.216637	ENSSSCG00000032213	1	up
GO:1903082	positive regulation of C-C chemokine receptor CCR7 signaling pathway	biological_process	1/550	1/12918	23.49	0.0425763	0.216637	ENSSSCG00000039270	1	up
GO:1903375	facioacoustic ganglion development	biological_process	1/550	1/12918	23.49	0.0425763	0.216637	ENSSSCG00000015398	1	down
GO:1903537	meiotic cell cycle process involved in oocyte maturation	biological_process	1/550	1/12918	23.49	0.0425763	0.216637	ENSSSCG00000010214	1	down
GO:1903713	asparagine transmembrane transport	biological_process	1/550	1/12918	23.49	0.0425763	0.216637	ENSSSCG00000025981	1	down
GO:1904146	positive regulation of meiotic cell cycle process involved in oocyte maturation	biological_process	1/550	1/12918	23.49	0.0425763	0.216637	ENSSSCG00000010214	1	down
GO:1904161	DNA synthesis involved in UV-damage excision repair	biological_process	1/550	1/12918	23.49	0.0425763	0.216637	ENSSSCG00000011358	1	up
GO:1904170	regulation of bleb assembly	biological_process	1/550	1/12918	23.49	0.0425763	0.216637	ENSSSCG00000016658	1	down
GO:1904307	response to desipramine	biological_process	1/550	1/12918	23.49	0.0425763	0.216637	ENSSSCG00000026850	1	up
GO:1904557	L-alanine transmembrane transport	biological_process	1/550	1/12918	23.49	0.0425763	0.216637	ENSSSCG00000025981	1	down
GO:1904777	negative regulation of protein localization to cell cortex	biological_process	1/550	1/12918	23.49	0.0425763	0.216637	ENSSSCG00000032279	1	down
GO:1904934	negative regulation of cell proliferation in midbrain	biological_process	1/550	1/12918	23.49	0.0425763	0.216637	ENSSSCG00000035859	1	up
GO:1904953	Wnt signaling pathway involved in midbrain dopaminergic neuron differentiation	biological_process	1/550	1/12918	23.49	0.0425763	0.216637	ENSSSCG00000035859	1	up
GO:1905042	negative regulation of epithelium regeneration	biological_process	1/550	1/12918	23.49	0.0425763	0.216637	ENSSSCG00000010831	1	up
GO:1905596	negative regulation of low-density lipoprotein particle receptor binding	biological_process	1/550	1/12918	23.49	0.0425763	0.216637	ENSSSCG00000025020	1	up
GO:1905598	negative regulation of low-density lipoprotein receptor activity	biological_process	1/550	1/12918	23.49	0.0425763	0.216637	ENSSSCG00000025020	1	up
GO:1905601	negative regulation of receptor-mediated endocytosis involved in cholesterol transport	biological_process	1/550	1/12918	23.49	0.0425763	0.216637	ENSSSCG00000025020	1	up
GO:1905671	regulation of lysosome organization	biological_process	1/550	1/12918	23.49	0.0425763	0.216637	ENSSSCG00000011358	1	up
GO:1905855	positive regulation of heparan sulfate binding	biological_process	1/550	1/12918	23.49	0.0425763	0.216637	ENSSSCG00000003088	1	up
GO:1905860	positive regulation of heparan sulfate proteoglycan binding	biological_process	1/550	1/12918	23.49	0.0425763	0.216637	ENSSSCG00000003088	1	up
GO:1905890	regulation of cellular response to very-low-density lipoprotein particle stimulus	biological_process	1/550	1/12918	23.49	0.0425763	0.216637	ENSSSCG00000003088	1	up
GO:1905920	positive regulation of CoA-transferase activity	biological_process	1/550	1/12918	23.49	0.0425763	0.216637	ENSSSCG00000032213	1	up
GO:1990090	cellular response to nerve growth factor stimulus	biological_process	1/550	1/12918	23.49	0.0425763	0.216637	ENSSSCG00000006160	1	down
GO:1990227	paranodal junction maintenance	biological_process	1/550	1/12918	23.49	0.0425763	0.216637	ENSSSCG00000005490	1	up
GO:1990542	mitochondrial transmembrane transport	biological_process	1/550	1/12918	23.49	0.0425763	0.216637	ENSSSCG00000014833	1	up
GO:2000119	negative regulation of sodium-dependent phosphate transport	biological_process	1/550	1/12918	23.49	0.0425763	0.216637	ENSSSCG00000035299	1	down
GO:2000124	regulation of endocannabinoid signaling pathway	biological_process	1/550	1/12918	23.49	0.0425763	0.216637	ENSSSCG00000011470	1	up
GO:2000182	regulation of progesterone biosynthetic process	biological_process	1/550	1/12918	23.49	0.0425763	0.216637	ENSSSCG00000014336	1	up
GO:2000350	positive regulation of CD40 signaling pathway	biological_process	1/550	1/12918	23.49	0.0425763	0.216637	ENSSSCG00000039270	1	up
GO:2000415	positive regulation of fibronectin-dependent thymocyte migration	biological_process	1/550	1/12918	23.49	0.0425763	0.216637	ENSSSCG00000010772	1	up
GO:2000418	positive regulation of eosinophil migration	biological_process	1/550	1/12918	23.49	0.0425763	0.216637	ENSSSCG00000010772	1	up
GO:2000431	regulation of cytokinesis, actomyosin contractile ring assembly	biological_process	1/550	1/12918	23.49	0.0425763	0.216637	ENSSSCG00000035746	1	down
GO:2000478	positive regulation of metanephric glomerular visceral epithelial cell development	biological_process	1/550	1/12918	23.49	0.0425763	0.216637	ENSSSCG00000039103	1	up
GO:2000534	positive regulation of renal albumin absorption	biological_process	1/550	1/12918	23.49	0.0425763	0.216637	ENSSSCG00000039103	1	up
GO:2000584	negative regulation of platelet-derived growth factor receptor-alpha signaling pathway	biological_process	1/550	1/12918	23.49	0.0425763	0.216637	ENSSSCG00000039103	1	up
GO:2000590	negative regulation of metanephric mesenchymal cell migration	biological_process	1/550	1/12918	23.49	0.0425763	0.216637	ENSSSCG00000039103	1	up
GO:2000724	positive regulation of cardiac vascular smooth muscle cell differentiation	biological_process	1/550	1/12918	23.49	0.0425763	0.216637	ENSSSCG00000026422	1	up
GO:2000775	histone H3-S10 phosphorylation involved in chromosome condensation	biological_process	1/550	1/12918	23.49	0.0425763	0.216637	ENSSSCG00000029326	1	down
GO:2001108	positive regulation of Rho guanyl-nucleotide exchange factor activity	biological_process	1/550	1/12918	23.49	0.0425763	0.216637	ENSSSCG00000016230	1	down
GO:0002920	regulation of humoral immune response	biological_process	2/550	8/12918	5.87	0.0427221	0.216637	ENSSSCG00000010893/ENSSSCG00000015662	2	up
GO:0030042	actin filament depolymerization	biological_process	2/550	8/12918	5.87	0.0427221	0.216637	ENSSSCG00000007085/ENSSSCG00000013400	2	down
GO:0030449	regulation of complement activation	biological_process	2/550	8/12918	5.87	0.0427221	0.216637	ENSSSCG00000010893/ENSSSCG00000015662	2	up
GO:0034375	high-density lipoprotein particle remodeling	biological_process	2/550	8/12918	5.87	0.0427221	0.216637	ENSSSCG00000003088/ENSSSCG00000007435	2	up
GO:0042446	hormone biosynthetic process	biological_process	2/550	8/12918	5.87	0.0427221	0.216637	ENSSSCG00000035222/ENSSSCG00000036990	2	up
GO:0043171	peptide catabolic process	biological_process	2/550	8/12918	5.87	0.0427221	0.216637	ENSSSCG00000009132/ENSSSCG00000014221	2	up
GO:0045742	positive regulation of epidermal growth factor receptor signaling pathway	biological_process	2/550	8/12918	5.87	0.0427221	0.216637	ENSSSCG00000010184/ENSSSCG00000026422	2	up
GO:0045780	positive regulation of bone resorption	biological_process	2/550	8/12918	5.87	0.0427221	0.216637	ENSSSCG00000004898/ENSSSCG00000010772	2	up
GO:0060078	regulation of postsynaptic membrane potential	biological_process	2/550	8/12918	5.87	0.0427221	0.216637	ENSSSCG00000012754/ENSSSCG00000033581	2	up
GO:0060292	long term synaptic depression	biological_process	2/550	8/12918	5.87	0.0427221	0.216637	ENSSSCG00000011470/ENSSSCG00000037539	2	up&down
GO:0060749	mammary gland alveolus development	biological_process	2/550	8/12918	5.87	0.0427221	0.216637	ENSSSCG00000004898/ENSSSCG00000024655	2	up
GO:0097028	dendritic cell differentiation	biological_process	2/550	8/12918	5.87	0.0427221	0.216637	ENSSSCG00000023762/ENSSSCG00000039270	2	up
GO:1901989	positive regulation of cell cycle phase transition	biological_process	2/550	8/12918	5.87	0.0427221	0.216637	ENSSSCG00000007351/ENSSSCG00000040486	2	down
GO:2001224	positive regulation of neuron migration	biological_process	2/550	8/12918	5.87	0.0427221	0.216637	ENSSSCG00000014224/ENSSSCG00000015398	2	up&down
GO:0045087	innate immune response	biological_process	10/550	127/12918	1.85	0.0444914	0.223008	ENSSSCG00000005503/ENSSSCG00000009002/ENSSSCG00000011436/ENSSSCG00000012118/ENSSSCG00000014369/ENSSSCG00000015801/ENSSSCG00000018050/ENSSSCG00000035419/ENSSSCG00000036246/ENSSSCG00000039569	10	up&down
GO:0002253	activation of immune response	biological_process	3/550	19/12918	3.71	0.0447721	0.223008	ENSSSCG00000010893/ENSSSCG00000011358/ENSSSCG00000017006	3	up
GO:0045071	negative regulation of viral genome replication	biological_process	3/550	19/12918	3.71	0.0447721	0.223008	ENSSSCG00000008648/ENSSSCG00000012077/ENSSSCG00000040575	3	down
GO:0045807	positive regulation of endocytosis	biological_process	3/550	19/12918	3.71	0.0447721	0.223008	ENSSSCG00000003088/ENSSSCG00000014369/ENSSSCG00000035859	3	up
GO:0055088	lipid homeostasis	biological_process	3/550	19/12918	3.71	0.0447721	0.223008	ENSSSCG00000002866/ENSSSCG00000017694/ENSSSCG00000027266	3	up
GO:0071320	cellular response to cAMP	biological_process	3/550	19/12918	3.71	0.0447721	0.223008	ENSSSCG00000004597/ENSSSCG00000027272/ENSSSCG00000039556	3	up
GO:0090068	positive regulation of cell cycle process	biological_process	3/550	19/12918	3.71	0.0447721	0.223008	ENSSSCG00000007351/ENSSSCG00000032424/ENSSSCG00000040486	3	up&down
GO:0050769	positive regulation of neurogenesis	biological_process	5/550	46/12918	2.55	0.0448474	0.223008	ENSSSCG00000008649/ENSSSCG00000011723/ENSSSCG00000017427/ENSSSCG00000026422/ENSSSCG00000032315	5	up&down
GO:0030178	negative regulation of Wnt signaling pathway	biological_process	4/550	32/12918	2.94	0.0455102	0.225213	ENSSSCG00000006051/ENSSSCG00000030113/ENSSSCG00000039283/ENSSSCG00000039797	4	up&down
GO:0046854	phosphatidylinositol phosphorylation	biological_process	4/550	32/12918	2.94	0.0455102	0.225213	ENSSSCG00000003909/ENSSSCG00000024162/ENSSSCG00000027272/ENSSSCG00000040581	4	up&down
GO:0030169	low-density lipoprotein particle binding	molecular_function	5/595	10/14769	12.41	2.22229e-05	0.00759978	ENSSSCG00000011443/ENSSSCG00000015405/ENSSSCG00000024071/ENSSSCG00000025020/ENSSSCG00000039270	5	up
GO:0045499	chemorepellent activity	molecular_function	6/595	17/14769	8.76	3.5269e-05	0.00759978	ENSSSCG00000006495/ENSSSCG00000014224/ENSSSCG00000015396/ENSSSCG00000015398/ENSSSCG00000023784/ENSSSCG00000035176	6	up&down
GO:0009922	fatty acid elongase activity	molecular_function	4/595	7/14769	14.18	8.28274e-05	0.00759978	ENSSSCG00000001045/ENSSSCG00000024149/ENSSSCG00000028080/ENSSSCG00000036236	4	up&down
GO:0102336	3-oxo-arachidoyl-CoA synthase activity	molecular_function	4/595	7/14769	14.18	8.28274e-05	0.00759978	ENSSSCG00000001045/ENSSSCG00000024149/ENSSSCG00000028080/ENSSSCG00000036236	4	up&down
GO:0102337	3-oxo-cerotoyl-CoA synthase activity	molecular_function	4/595	7/14769	14.18	8.28274e-05	0.00759978	ENSSSCG00000001045/ENSSSCG00000024149/ENSSSCG00000028080/ENSSSCG00000036236	4	up&down
GO:0102338	3-oxo-lignoceronyl-CoA synthase activity	molecular_function	4/595	7/14769	14.18	8.28274e-05	0.00759978	ENSSSCG00000001045/ENSSSCG00000024149/ENSSSCG00000028080/ENSSSCG00000036236	4	up&down
GO:0030215	semaphorin receptor binding	molecular_function	6/595	20/14769	7.45	9.95985e-05	0.00783309	ENSSSCG00000006495/ENSSSCG00000014224/ENSSSCG00000015396/ENSSSCG00000015398/ENSSSCG00000023784/ENSSSCG00000035176	6	up&down
GO:0003777	microtubule motor activity	molecular_function	11/595	80/14769	3.41	0.000346833	0.0238676	ENSSSCG00000000439/ENSSSCG00000001510/ENSSSCG00000003931/ENSSSCG00000004969/ENSSSCG00000010471/ENSSSCG00000011309/ENSSSCG00000012377/ENSSSCG00000014326/ENSSSCG00000023296/ENSSSCG00000026924/ENSSSCG00000029509	11	up&down
GO:0008017	microtubule binding	molecular_function	17/595	169/14769	2.5	0.000478683	0.0292808	ENSSSCG00000000439/ENSSSCG00000001510/ENSSSCG00000004969/ENSSSCG00000007351/ENSSSCG00000010471/ENSSSCG00000011309/ENSSSCG00000012077/ENSSSCG00000012377/ENSSSCG00000012584/ENSSSCG00000014326/ENSSSCG00000015581/ENSSSCG00000023296/ENSSSCG00000026748/ENSSSCG00000026924/ENSSSCG00000029509/ENSSSCG00000037307/ENSSSCG00000040486	17	up&down
GO:0004180	carboxypeptidase activity	molecular_function	3/595	5/14769	14.89	0.000612212	0.0337039	ENSSSCG00000007522/ENSSSCG00000012138/ENSSSCG00000014933	3	up&down
GO:0005330	dopamine:sodium symporter activity	molecular_function	2/595	2/14769	24.82	0.00162043	0.0524759	ENSSSCG00000002827/ENSSSCG00000017121	2	up&down
GO:0005334	norepinephrine:sodium symporter activity	molecular_function	2/595	2/14769	24.82	0.00162043	0.0524759	ENSSSCG00000002827/ENSSSCG00000017121	2	up&down
GO:0017077	oxidative phosphorylation uncoupler activity	molecular_function	2/595	2/14769	24.82	0.00162043	0.0524759	ENSSSCG00000014833/ENSSSCG00000014834	2	up
GO:0034189	very-low-density lipoprotein particle binding	molecular_function	2/595	2/14769	24.82	0.00162043	0.0524759	ENSSSCG00000025020/ENSSSCG00000039270	2	up
GO:0034632	retinol transporter activity	molecular_function	2/595	2/14769	24.82	0.00162043	0.0524759	ENSSSCG00000001909/ENSSSCG00000010479	2	up&down
GO:0047023	androsterone dehydrogenase activity	molecular_function	2/595	2/14769	24.82	0.00162043	0.0524759	ENSSSCG00000000362/ENSSSCG00000000419	2	up
GO:0047044	androstan-3-alpha,17-beta-diol dehydrogenase activity	molecular_function	2/595	2/14769	24.82	0.00162043	0.0524759	ENSSSCG00000000362/ENSSSCG00000000419	2	up
GO:0005524	ATP binding	molecular_function	72/595	1268/14769	1.41	0.00177263	0.0542154	ENSSSCG00000000146/ENSSSCG00000000439/ENSSSCG00000001510/ENSSSCG00000002516/ENSSSCG00000003558/ENSSSCG00000003917/ENSSSCG00000003931/ENSSSCG00000004466/ENSSSCG00000004969/ENSSSCG00000005000/ENSSSCG00000005845/ENSSSCG00000007240/ENSSSCG00000007493/ENSSSCG00000008103/ENSSSCG00000008294/ENSSSCG00000009671/ENSSSCG00000009720/ENSSSCG00000009755/ENSSSCG00000009839/ENSSSCG00000009956/ENSSSCG00000010190/…	72	up&down
GO:0043394	proteoglycan binding	molecular_function	3/595	7/14769	10.64	0.00201645	0.0584268	ENSSSCG00000010893/ENSSSCG00000010948/ENSSSCG00000035218	3	up
GO:0005044	scavenger receptor activity	molecular_function	7/595	46/14769	3.78	0.00226789	0.0624266	ENSSSCG00000006979/ENSSSCG00000009672/ENSSSCG00000011443/ENSSSCG00000015405/ENSSSCG00000015716/ENSSSCG00000024071/ENSSSCG00000033146	7	up
GO:0008289	lipid binding	molecular_function	10/595	91/14769	2.73	0.00357103	0.0840201	ENSSSCG00000000151/ENSSSCG00000004572/ENSSSCG00000006153/ENSSSCG00000015355/ENSSSCG00000015405/ENSSSCG00000016855/ENSSSCG00000017608/ENSSSCG00000017761/ENSSSCG00000027505/ENSSSCG00000036883	10	up
GO:0008009	chemokine activity	molecular_function	6/595	38/14769	3.92	0.00383243	0.0840201	ENSSSCG00000008953/ENSSSCG00000008959/ENSSSCG00000033457/ENSSSCG00000034722/ENSSSCG00000035736/ENSSSCG00000037579	6	up
GO:0004714	transmembrane receptor protein tyrosine kinase activity	molecular_function	6/595	39/14769	3.82	0.00437813	0.0840201	ENSSSCG00000008103/ENSSSCG00000010959/ENSSSCG00000014007/ENSSSCG00000014441/ENSSSCG00000016230/ENSSSCG00000038675	6	up&down
GO:0004741	[pyruvate dehydrogenase (lipoamide)] phosphatase activity	molecular_function	2/595	3/14769	16.55	0.00473115	0.0840201	ENSSSCG00000011434/ENSSSCG00000036751	2	up
GO:0004937	alpha1-adrenergic receptor activity	molecular_function	2/595	3/14769	16.55	0.00473115	0.0840201	ENSSSCG00000007139/ENSSSCG00000009661	2	down
GO:0004999	vasoactive intestinal polypeptide receptor activity	molecular_function	2/595	3/14769	16.55	0.00473115	0.0840201	ENSSSCG00000016403/ENSSSCG00000016672	2	up
GO:0005384	manganese ion transmembrane transporter activity	molecular_function	2/595	3/14769	16.55	0.00473115	0.0840201	ENSSSCG00000023762/ENSSSCG00000039798	2	up
GO:0035173	histone kinase activity	molecular_function	2/595	3/14769	16.55	0.00473115	0.0840201	ENSSSCG00000010214/ENSSSCG00000029326	2	down
GO:0036042	long-chain fatty acyl-CoA binding	molecular_function	2/595	3/14769	16.55	0.00473115	0.0840201	ENSSSCG00000027266/ENSSSCG00000032213	2	up
GO:0036374	glutathione hydrolase activity	molecular_function	2/595	3/14769	16.55	0.00473115	0.0840201	ENSSSCG00000010055/ENSSSCG00000010056	2	up
GO:0070326	very-low-density lipoprotein particle receptor binding	molecular_function	2/595	3/14769	16.55	0.00473115	0.0840201	ENSSSCG00000003088/ENSSSCG00000025020	2	up
GO:0004222	metalloendopeptidase activity	molecular_function	10/595	102/14769	2.43	0.00799917	0.130007	ENSSSCG00000006132/ENSSSCG00000007436/ENSSSCG00000009644/ENSSSCG00000010772/ENSSSCG00000011723/ENSSSCG00000014984/ENSSSCG00000016816/ENSSSCG00000029675/ENSSSCG00000034440/ENSSSCG00000038627	10	up&down
GO:0001848	complement binding	molecular_function	2/595	4/14769	12.41	0.00920984	0.130007	ENSSSCG00000010893/ENSSSCG00000015662	2	up
GO:0003996	acyl-CoA ligase activity	molecular_function	2/595	4/14769	12.41	0.00920984	0.130007	ENSSSCG00000007857/ENSSSCG00000026453	2	up
GO:0004321	fatty-acyl-CoA synthase activity	molecular_function	2/595	4/14769	12.41	0.00920984	0.130007	ENSSSCG00000007857/ENSSSCG00000026453	2	up
GO:0008035	high-density lipoprotein particle binding	molecular_function	2/595	4/14769	12.41	0.00920984	0.130007	ENSSSCG00000015405/ENSSSCG00000039270	2	up
GO:0015057	thrombin-activated receptor activity	molecular_function	2/595	4/14769	12.41	0.00920984	0.130007	ENSSSCG00000035355/ENSSSCG00000037582	2	up
GO:0015254	glycerol channel activity	molecular_function	2/595	4/14769	12.41	0.00920984	0.130007	ENSSSCG00000004597/ENSSSCG00000040513	2	up
GO:0015645	fatty acid ligase activity	molecular_function	2/595	4/14769	12.41	0.00920984	0.130007	ENSSSCG00000007857/ENSSSCG00000026453	2	up
GO:0005251	delayed rectifier potassium channel activity	molecular_function	3/595	13/14769	5.73	0.0137534	0.159562	ENSSSCG00000003975/ENSSSCG00000007476/ENSSSCG00000039556	3	up&down
GO:0005507	copper ion binding	molecular_function	5/595	36/14769	3.45	0.0139988	0.159562	ENSSSCG00000006289/ENSSSCG00000012363/ENSSSCG00000017383/ENSSSCG00000028814/ENSSSCG00000030461	5	up&down
GO:0017147	Wnt-protein binding	molecular_function	4/595	24/14769	4.14	0.0145851	0.159562	ENSSSCG00000006051/ENSSSCG00000023746/ENSSSCG00000035299/ENSSSCG00000039797	4	up&down
GO:0003841	1-acylglycerol-3-phosphate O-acyltransferase activity	molecular_function	2/595	5/14769	9.93	0.0149416	0.159562	ENSSSCG00000001435/ENSSSCG00000027266	2	up
GO:0004862	cAMP-dependent protein kinase inhibitor activity	molecular_function	2/595	5/14769	9.93	0.0149416	0.159562	ENSSSCG00000004236/ENSSSCG00000006163	2	up&down
GO:0008235	metalloexopeptidase activity	molecular_function	2/595	5/14769	9.93	0.0149416	0.159562	ENSSSCG00000021105/ENSSSCG00000032424	2	up
GO:0015204	urea transmembrane transporter activity	molecular_function	2/595	5/14769	9.93	0.0149416	0.159562	ENSSSCG00000004597/ENSSSCG00000040513	2	up
GO:0004089	carbonate dehydratase activity	molecular_function	3/595	15/14769	4.96	0.0206123	0.159562	ENSSSCG00000006141/ENSSSCG00000012141/ENSSSCG00000023186	3	up
GO:0005041	low-density lipoprotein receptor activity	molecular_function	2/595	6/14769	8.27	0.0218185	0.159562	ENSSSCG00000011443/ENSSSCG00000015405	2	up
GO:0010997	anaphase-promoting complex binding	molecular_function	2/595	6/14769	8.27	0.0218185	0.159562	ENSSSCG00000003949/ENSSSCG00000026748	2	down
GO:0070006	metalloaminopeptidase activity	molecular_function	3/595	16/14769	4.65	0.0246253	0.159562	ENSSSCG00000006132/ENSSSCG00000009132/ENSSSCG00000014221	3	up&down
GO:0017046	peptide hormone binding	molecular_function	3/595	17/14769	4.38	0.0290275	0.159562	ENSSSCG00000009477/ENSSSCG00000016403/ENSSSCG00000016672	3	up
GO:0004115	3',5'-cyclic-AMP phosphodiesterase activity	molecular_function	2/595	7/14769	7.09	0.0297393	0.159562	ENSSSCG00000003805/ENSSSCG00000036363	2	up
GO:0004499	N,N-dimethylaniline monooxygenase activity	molecular_function	2/595	7/14769	7.09	0.0297393	0.159562	ENSSSCG00000015267/ENSSSCG00000015268	2	up
GO:0005005	transmembrane-ephrin receptor activity	molecular_function	2/595	7/14769	7.09	0.0297393	0.159562	ENSSSCG00000016230/ENSSSCG00000038675	2	up&down
GO:0005509	calcium ion binding	molecular_function	32/595	569/14769	1.4	0.0358552	0.159562	ENSSSCG00000000672/ENSSSCG00000001434/ENSSSCG00000002314/ENSSSCG00000003711/ENSSSCG00000004572/ENSSSCG00000004678/ENSSSCG00000004728/ENSSSCG00000006578/ENSSSCG00000007116/ENSSSCG00000007439/ENSSSCG00000008509/ENSSSCG00000008603/ENSSSCG00000009412/ENSSSCG00000010144/ENSSSCG00000010772/ENSSSCG00000011299/ENSSSCG00000011443/ENSSSCG00000012597/ENSSSCG00000013545/ENSSSCG00000013556/ENSSSCG00000014117/…	32	up&down
GO:0003823	antigen binding	molecular_function	2/595	8/14769	6.21	0.0386091	0.159562	ENSSSCG00000003017/ENSSSCG00000006379	2	up
GO:0004467	long-chain fatty acid-CoA ligase activity	molecular_function	2/595	8/14769	6.21	0.0386091	0.159562	ENSSSCG00000013879/ENSSSCG00000014257	2	up
GO:0005247	voltage-gated chloride channel activity	molecular_function	2/595	8/14769	6.21	0.0386091	0.159562	ENSSSCG00000021581/ENSSSCG00000024809	2	up&down
GO:0016176	superoxide-generating NADPH oxidase activator activity	molecular_function	2/595	8/14769	6.21	0.0386091	0.159562	ENSSSCG00000000137/ENSSSCG00000015559	2	up
GO:0031957	very long-chain fatty acid-CoA ligase activity	molecular_function	2/595	8/14769	6.21	0.0386091	0.159562	ENSSSCG00000013879/ENSSSCG00000014257	2	up
GO:0043395	heparan sulfate proteoglycan binding	molecular_function	2/595	8/14769	6.21	0.0386091	0.159562	ENSSSCG00000003088/ENSSSCG00000010893	2	up
GO:1904315	transmitter-gated ion channel activity involved in regulation of postsynaptic membrane potential	molecular_function	3/595	19/14769	3.92	0.038988	0.159562	ENSSSCG00000012754/ENSSSCG00000029635/ENSSSCG00000032722	3	up&down
GO:0001621	ADP receptor activity	molecular_function	1/595	1/14769	24.82	0.0402871	0.159562	ENSSSCG00000011721	1	up
GO:0003835	beta-galactoside alpha-2,6-sialyltransferase activity	molecular_function	1/595	1/14769	24.82	0.0402871	0.159562	ENSSSCG00000025770	1	up
GO:0003846	2-acylglycerol O-acyltransferase activity	molecular_function	1/595	1/14769	24.82	0.0402871	0.159562	ENSSSCG00000014861	1	up
GO:0003878	ATP citrate synthase activity	molecular_function	1/595	1/14769	24.82	0.0402871	0.159562	ENSSSCG00000017421	1	up
GO:0004505	phenylalanine 4-monooxygenase activity	molecular_function	1/595	1/14769	24.82	0.0402871	0.159562	ENSSSCG00000000856	1	up
GO:0004512	inositol-3-phosphate synthase activity	molecular_function	1/595	1/14769	24.82	0.0402871	0.159562	ENSSSCG00000040524	1	up
GO:0004617	phosphoglycerate dehydrogenase activity	molecular_function	1/595	1/14769	24.82	0.0402871	0.159562	ENSSSCG00000006717	1	down
GO:0004648	O-phospho-L-serine:2-oxoglutarate aminotransferase activity	molecular_function	1/595	1/14769	24.82	0.0402871	0.159562	ENSSSCG00000005287	1	down
GO:0004736	pyruvate carboxylase activity	molecular_function	1/595	1/14769	24.82	0.0402871	0.159562	ENSSSCG00000012926	1	up
GO:0004876	complement component C3a receptor activity	molecular_function	1/595	1/14769	24.82	0.0402871	0.159562	Sus_scrofa_newGene_1473	1	up
GO:0004911	interleukin-2 receptor activity	molecular_function	1/595	1/14769	24.82	0.0402871	0.159562	ENSSSCG00000022849	1	up
GO:0004964	luteinizing hormone receptor activity	molecular_function	1/595	1/14769	24.82	0.0402871	0.159562	ENSSSCG00000008421	1	up
GO:0005115	receptor tyrosine kinase-like orphan receptor binding	molecular_function	1/595	1/14769	24.82	0.0402871	0.159562	ENSSSCG00000035859	1	up
GO:0005153	interleukin-8 receptor binding	molecular_function	1/595	1/14769	24.82	0.0402871	0.159562	ENSSSCG00000008953	1	up
GO:0005328	neurotransmitter:sodium symporter activity	molecular_function	1/595	1/14769	24.82	0.0402871	0.159562	ENSSSCG00000002827	1	down
GO:0005345	purine nucleobase transmembrane transporter activity	molecular_function	1/595	1/14769	24.82	0.0402871	0.159562	ENSSSCG00000004597	1	up
GO:0005350	pyrimidine nucleobase transmembrane transporter activity	molecular_function	1/595	1/14769	24.82	0.0402871	0.159562	ENSSSCG00000004597	1	up
GO:0005369	taurine:sodium symporter activity	molecular_function	1/595	1/14769	24.82	0.0402871	0.159562	ENSSSCG00000011600	1	up
GO:0005501	retinoid binding	molecular_function	1/595	1/14769	24.82	0.0402871	0.159562	ENSSSCG00000010479	1	up
GO:0008238	exopeptidase activity	molecular_function	1/595	1/14769	24.82	0.0402871	0.159562	ENSSSCG00000011723	1	up
GO:0008260	3-oxoacid CoA-transferase activity	molecular_function	1/595	1/14769	24.82	0.0402871	0.159562	ENSSSCG00000016863	1	up
GO:0008747	N-acetylneuraminate lyase activity	molecular_function	1/595	1/14769	24.82	0.0402871	0.159562	ENSSSCG00000022292	1	up
GO:0015184	L-cystine transmembrane transporter activity	molecular_function	1/595	1/14769	24.82	0.0402871	0.159562	ENSSSCG00000028282	1	down
GO:0015195	L-threonine transmembrane transporter activity	molecular_function	1/595	1/14769	24.82	0.0402871	0.159562	ENSSSCG00000028282	1	down
GO:0015265	urea channel activity	molecular_function	1/595	1/14769	24.82	0.0402871	0.159562	ENSSSCG00000004597	1	up
GO:0016401	palmitoyl-CoA oxidase activity	molecular_function	1/595	1/14769	24.82	0.0402871	0.159562	ENSSSCG00000011250	1	up
GO:0016717	oxidoreductase activity, acting on paired donors, with oxidation of a pair of donors resulting in the reduction of molecular oxygen to two molecules of water	molecular_function	1/595	1/14769	24.82	0.0402871	0.159562	ENSSSCG00000010554	1	up
GO:0016933	extracellular-glycine-gated ion channel activity	molecular_function	1/595	1/14769	24.82	0.0402871	0.159562	ENSSSCG00000032722	1	down
GO:0018729	propionate CoA-transferase activity	molecular_function	1/595	1/14769	24.82	0.0402871	0.159562	ENSSSCG00000007857	1	up
GO:0019767	IgE receptor activity	molecular_function	1/595	1/14769	24.82	0.0402871	0.159562	ENSSSCG00000006357	1	up
GO:0022858	alanine transmembrane transporter activity	molecular_function	1/595	1/14769	24.82	0.0402871	0.159562	ENSSSCG00000025981	1	down
GO:0022889	serine transmembrane transporter activity	molecular_function	1/595	1/14769	24.82	0.0402871	0.159562	ENSSSCG00000025981	1	down
GO:0030305	heparanase activity	molecular_function	1/595	1/14769	24.82	0.0402871	0.159562	ENSSSCG00000009237	1	up
GO:0030343	vitamin D3 25-hydroxylase activity	molecular_function	1/595	1/14769	24.82	0.0402871	0.159562	ENSSSCG00000016199	1	up
GO:0030348	syntaxin-3 binding	molecular_function	1/595	1/14769	24.82	0.0402871	0.159562	ENSSSCG00000013576	1	up
GO:0030729	acetoacetate-CoA ligase activity	molecular_function	1/595	1/14769	24.82	0.0402871	0.159562	ENSSSCG00000009755	1	up
GO:0031073	cholesterol 26-hydroxylase activity	molecular_function	1/595	1/14769	24.82	0.0402871	0.159562	ENSSSCG00000016199	1	up
GO:0031696	alpha-2C adrenergic receptor binding	molecular_function	1/595	1/14769	24.82	0.0402871	0.159562	ENSSSCG00000010629	1	up
GO:0031703	type 2 angiotensin receptor binding	molecular_function	1/595	1/14769	24.82	0.0402871	0.159562	ENSSSCG00000010184	1	up
GO:0032558	adenyl deoxyribonucleotide binding	molecular_function	1/595	1/14769	24.82	0.0402871	0.159562	ENSSSCG00000011358	1	up
GO:0034185	apolipoprotein binding	molecular_function	1/595	1/14769	24.82	0.0402871	0.159562	ENSSSCG00000025020	1	up
GO:0034190	apolipoprotein receptor binding	molecular_function	1/595	1/14769	24.82	0.0402871	0.159562	ENSSSCG00000025020	1	up
GO:0034590	L-hydroxyproline transmembrane transporter activity	molecular_function	1/595	1/14769	24.82	0.0402871	0.159562	ENSSSCG00000028282	1	down
GO:0034714	type III transforming growth factor beta receptor binding	molecular_function	1/595	1/14769	24.82	0.0402871	0.159562	ENSSSCG00000003017	1	up
GO:0036143	kringle domain binding	molecular_function	1/595	1/14769	24.82	0.0402871	0.159562	ENSSSCG00000011299	1	up
GO:0036328	VEGF-C-activated receptor activity	molecular_function	1/595	1/14769	24.82	0.0402871	0.159562	ENSSSCG00000014007	1	up
GO:0042731	PH domain binding	molecular_function	1/595	1/14769	24.82	0.0402871	0.159562	ENSSSCG00000016230	1	down
GO:0043914	NADPH:sulfur oxidoreductase activity	molecular_function	1/595	1/14769	24.82	0.0402871	0.159562	ENSSSCG00000013400	1	down
GO:0044729	hemi-methylated DNA-binding	molecular_function	1/595	1/14769	24.82	0.0402871	0.159562	ENSSSCG00000014336	1	up
GO:0046911	metal chelating activity	molecular_function	1/595	1/14769	24.82	0.0402871	0.159562	ENSSSCG00000003088	1	up
GO:0047150	betaine-homocysteine S-methyltransferase activity	molecular_function	1/595	1/14769	24.82	0.0402871	0.159562	ENSSSCG00000014108	1	down
GO:0047291	lactosylceramide alpha-2,3-sialyltransferase activity	molecular_function	1/595	1/14769	24.82	0.0402871	0.159562	ENSSSCG00000008227	1	up
GO:0047704	bile-salt sulfotransferase activity	molecular_function	1/595	1/14769	24.82	0.0402871	0.159562	ENSSSCG00000033207	1	up
GO:0047749	cholestanetriol 26-monooxygenase activity	molecular_function	1/595	1/14769	24.82	0.0402871	0.159562	ENSSSCG00000016199	1	up
GO:0047760	butyrate-CoA ligase activity	molecular_function	1/595	1/14769	24.82	0.0402871	0.159562	ENSSSCG00000007857	1	up
GO:0050129	N-formylglutamate deformylase activity	molecular_function	1/595	1/14769	24.82	0.0402871	0.159562	ENSSSCG00000014933	1	down
GO:0050897	cobalt ion binding	molecular_function	1/595	1/14769	24.82	0.0402871	0.159562	ENSSSCG00000032424	1	up
GO:0051139	metal ion:proton antiporter activity	molecular_function	1/595	1/14769	24.82	0.0402871	0.159562	ENSSSCG00000039798	1	up
GO:0051264	mono-olein transacylation activity	molecular_function	1/595	1/14769	24.82	0.0402871	0.159562	ENSSSCG00000027266	1	up
GO:0051265	diolein transacylation activity	molecular_function	1/595	1/14769	24.82	0.0402871	0.159562	ENSSSCG00000027266	1	up
GO:0070735	protein-glycine ligase activity	molecular_function	1/595	1/14769	24.82	0.0402871	0.159562	ENSSSCG00000011553	1	up
GO:0070856	myosin VI light chain binding	molecular_function	1/595	1/14769	24.82	0.0402871	0.159562	ENSSSCG00000006475	1	down
GO:0070892	lipoteichoic acid receptor activity	molecular_function	1/595	1/14769	24.82	0.0402871	0.159562	ENSSSCG00000015405	1	up
GO:0071791	chemokine (C-C motif) ligand 5 binding	molecular_function	1/595	1/14769	24.82	0.0402871	0.159562	ENSSSCG00000011322	1	up
GO:0071813	lipoprotein particle binding	molecular_function	1/595	1/14769	24.82	0.0402871	0.159562	ENSSSCG00000003088	1	up
GO:0086089	voltage-gated potassium channel activity involved in atrial cardiac muscle cell action potential repolarization	molecular_function	1/595	1/14769	24.82	0.0402871	0.159562	ENSSSCG00000039556	1	up
GO:0097161	DH domain binding	molecular_function	1/595	1/14769	24.82	0.0402871	0.159562	ENSSSCG00000016230	1	down
GO:0097655	serpin family protein binding	molecular_function	1/595	1/14769	24.82	0.0402871	0.159562	ENSSSCG00000010948	1	up
GO:0099038	ceramide-translocating ATPase activity	molecular_function	1/595	1/14769	24.82	0.0402871	0.159562	ENSSSCG00000035073	1	down
GO:0099580	ion antiporter activity involved in regulation of postsynaptic membrane potential	molecular_function	1/595	1/14769	24.82	0.0402871	0.159562	ENSSSCG00000002315	1	down
GO:0120017	intermembrane ceramide transfer activity	molecular_function	1/595	1/14769	24.82	0.0402871	0.159562	ENSSSCG00000007435	1	up
GO:0120019	intermembrane phosphotidylcholine transfer activity	molecular_function	1/595	1/14769	24.82	0.0402871	0.159562	ENSSSCG00000007435	1	up
GO:1901611	phosphatidylglycerol binding	molecular_function	1/595	1/14769	24.82	0.0402871	0.159562	ENSSSCG00000007435	1	up
GO:1901640	XTP binding	molecular_function	1/595	1/14769	24.82	0.0402871	0.159562	ENSSSCG00000032424	1	up
GO:1901641	ITP binding	molecular_function	1/595	1/14769	24.82	0.0402871	0.159562	ENSSSCG00000032424	1	up
GO:1902379	chemoattractant activity involved in axon guidance	molecular_function	1/595	1/14769	24.82	0.0402871	0.159562	ENSSSCG00000035859	1	up
GO:1904121	phosphatidylethanolamine transporter activity	molecular_function	1/595	1/14769	24.82	0.0402871	0.159562	ENSSSCG00000007435	1	up
GO:0042803	protein homodimerization activity	molecular_function	20/595	326/14769	1.52	0.0411721	0.161902	ENSSSCG00000000362/ENSSSCG00000002516/ENSSSCG00000003088/ENSSSCG00000010629/ENSSSCG00000011358/ENSSSCG00000011723/ENSSSCG00000012409/ENSSSCG00000014007/ENSSSCG00000015579/ENSSSCG00000015581/ENSSSCG00000020736/ENSSSCG00000025770/ENSSSCG00000032424/ENSSSCG00000033593/ENSSSCG00000033822/ENSSSCG00000035218/ENSSSCG00000036305/ENSSSCG00000039103/ENSSSCG00000039798/ENSSSCG00000040486	20	up&down
GO:0005540	hyaluronic acid binding	molecular_function	3/595	20/14769	3.72	0.0445358	0.173888	ENSSSCG00000011443/ENSSSCG00000017022/ENSSSCG00000029886	3	up&down
GO:0004722	protein serine/threonine phosphatase activity	molecular_function	4/595	34/14769	2.92	0.0465132	0.179809	ENSSSCG00000011434/ENSSSCG00000030274/ENSSSCG00000036751/ENSSSCG00000038867	4	up&down
GO:0000400	four-way junction DNA binding	molecular_function	2/595	9/14769	5.52	0.0483387	0.179809	ENSSSCG00000005000/ENSSSCG00000032315	2	down
GO:0003810	protein-glutamine gamma-glutamyltransferase activity	molecular_function	2/595	9/14769	5.52	0.0483387	0.179809	ENSSSCG00000024310/ENSSSCG00000026043	2	up
GO:0004322	ferroxidase activity	molecular_function	2/595	9/14769	5.52	0.0483387	0.179809	ENSSSCG00000012363/ENSSSCG00000030461	2	up&down
GO:0015250	water channel activity	molecular_function	2/595	9/14769	5.52	0.0483387	0.179809	ENSSSCG00000004597/ENSSSCG00000040513	2	up
GO:0016175	superoxide-generating NADPH oxidase activity	molecular_function	2/595	9/14769	5.52	0.0483387	0.179809	ENSSSCG00000015559/ENSSSCG00000036246	2	up
GO:0016747	transferase activity, transferring acyl groups other than amino-acyl groups	molecular_function	2/595	9/14769	5.52	0.0483387	0.179809	ENSSSCG00000034102/ENSSSCG00000038322	2	up
GO:0005887	integral component of plasma membrane	cellular_component	43/593	532/15674	2.14	2.34975e-06	0.000798914	ENSSSCG00000001841/ENSSSCG00000001909/ENSSSCG00000002315/ENSSSCG00000002432/ENSSSCG00000002827/ENSSSCG00000004597/ENSSSCG00000005311/ENSSSCG00000006132/ENSSSCG00000006495/ENSSSCG00000006811/ENSSSCG00000006862/ENSSSCG00000007139/ENSSSCG00000008103/ENSSSCG00000009486/ENSSSCG00000009661/ENSSSCG00000010629/ENSSSCG00000010772/ENSSSCG00000010959/ENSSSCG00000011443/ENSSSCG00000011600/ENSSSCG00000011721/…	43	up&down
GO:0005615	extracellular space	cellular_component	54/593	779/15674	1.83	1.22861e-05	0.00208864	ENSSSCG00000000442/ENSSSCG00000003017/ENSSSCG00000003333/ENSSSCG00000003582/ENSSSCG00000006051/ENSSSCG00000006132/ENSSSCG00000006289/ENSSSCG00000006495/ENSSSCG00000006796/ENSSSCG00000007435/ENSSSCG00000007522/ENSSSCG00000008090/ENSSSCG00000008103/ENSSSCG00000008603/ENSSSCG00000008953/ENSSSCG00000008959/ENSSSCG00000008965/ENSSSCG00000010184/ENSSSCG00000010893/ENSSSCG00000010948/ENSSSCG00000011299/…	54	up&down
GO:0005876	spindle microtubule	cellular_component	6/593	20/15674	7.93	7.03773e-05	0.00647541	ENSSSCG00000010214/ENSSSCG00000010471/ENSSSCG00000012584/ENSSSCG00000017758/ENSSSCG00000026748/ENSSSCG00000040486	6	up&down
GO:0051233	spindle midzone	cellular_component	5/593	13/15674	10.17	7.61813e-05	0.00647541	ENSSSCG00000017761/ENSSSCG00000026748/ENSSSCG00000032909/ENSSSCG00000040411/ENSSSCG00000040486	5	up&down
GO:0045121	membrane raft	cellular_component	10/593	64/15674	4.13	0.000133551	0.00908147	ENSSSCG00000009237/ENSSSCG00000011723/ENSSSCG00000014369/ENSSSCG00000015405/ENSSSCG00000017006/ENSSSCG00000023915/ENSSSCG00000026742/ENSSSCG00000027487/ENSSSCG00000037642/ENSSSCG00000039556	10	up
GO:0031262	Ndc80 complex	cellular_component	3/593	4/15674	19.82	0.000209473	0.0118701	ENSSSCG00000003697/ENSSSCG00000006333/ENSSSCG00000015924	3	down
GO:0031012	extracellular matrix	cellular_component	14/593	126/15674	2.94	0.00029452	0.0143053	ENSSSCG00000003088/ENSSSCG00000006002/ENSSSCG00000006051/ENSSSCG00000006132/ENSSSCG00000007436/ENSSSCG00000009237/ENSSSCG00000009975/ENSSSCG00000014984/ENSSSCG00000016957/ENSSSCG00000029675/ENSSSCG00000033000/ENSSSCG00000034440/ENSSSCG00000035419/ENSSSCG00000035859	14	up&down
GO:0030496	midbody	cellular_component	10/593	75/15674	3.52	0.000503709	0.0214076	ENSSSCG00000010214/ENSSSCG00000010896/ENSSSCG00000012637/ENSSSCG00000015581/ENSSSCG00000016658/ENSSSCG00000018051/ENSSSCG00000023296/ENSSSCG00000026748/ENSSSCG00000032909/ENSSSCG00000040486	10	up&down
GO:0072686	mitotic spindle	cellular_component	7/593	39/15674	4.74	0.000573533	0.0216668	ENSSSCG00000000265/ENSSSCG00000001510/ENSSSCG00000007351/ENSSSCG00000010214/ENSSSCG00000010471/ENSSSCG00000018051/ENSSSCG00000029509	7	up&down
GO:0005871	kinesin complex	cellular_component	6/593	30/15674	5.29	0.000781127	0.0265583	ENSSSCG00000001510/ENSSSCG00000010471/ENSSSCG00000011309/ENSSSCG00000023296/ENSSSCG00000026924/ENSSSCG00000029509	6	up&down
GO:0000942	condensed nuclear chromosome outer kinetochore	cellular_component	2/593	2/15674	26.43	0.00142904	0.0404895	ENSSSCG00000026748/ENSSSCG00000029326	2	down
GO:0097125	cyclin B1-CDK1 complex	cellular_component	2/593	2/15674	26.43	0.00142904	0.0404895	ENSSSCG00000010214/ENSSSCG00000029326	2	down
GO:0005874	microtubule	cellular_component	12/593	118/15674	2.69	0.00170262	0.0445301	ENSSSCG00000001510/ENSSSCG00000004969/ENSSSCG00000007235/ENSSSCG00000010471/ENSSSCG00000011309/ENSSSCG00000013545/ENSSSCG00000014326/ENSSSCG00000016216/ENSSSCG00000023296/ENSSSCG00000026924/ENSSSCG00000029509/ENSSSCG00000040486	12	up&down
GO:0000922	spindle pole	cellular_component	8/593	64/15674	3.3	0.00274084	0.0665634	ENSSSCG00000007351/ENSSSCG00000010471/ENSSSCG00000011207/ENSSSCG00000015581/ENSSSCG00000017761/ENSSSCG00000026748/ENSSSCG00000029326/ENSSSCG00000039546	8	up&down
GO:0005581	collagen trimer	cellular_component	6/593	44/15674	3.6	0.00593931	0.134624	ENSSSCG00000003524/ENSSSCG00000008737/ENSSSCG00000016823/ENSSSCG00000033512/ENSSSCG00000038706/ENSSSCG00000039103	6	up&down
GO:0046658	anchored component of plasma membrane	cellular_component	4/593	21/15674	5.03	0.00726545	0.135705	ENSSSCG00000007649/ENSSSCG00000012680/ENSSSCG00000031946/ENSSSCG00000039703	4	up
GO:0005576	extracellular region	cellular_component	28/593	452/15674	1.64	0.00741255	0.135705	ENSSSCG00000000151/ENSSSCG00000000261/ENSSSCG00000003524/ENSSSCG00000006051/ENSSSCG00000006796/ENSSSCG00000007649/ENSSSCG00000008737/ENSSSCG00000009240/ENSSSCG00000009975/ENSSSCG00000010893/ENSSSCG00000011453/ENSSSCG00000011717/ENSSSCG00000014117/ENSSSCG00000015253/ENSSSCG00000015476/ENSSSCG00000015662/ENSSSCG00000015717/ENSSSCG00000016810/ENSSSCG00000016823/ENSSSCG00000021208/ENSSSCG00000028814/…	28	up&down
GO:0000778	condensed nuclear chromosome kinetochore	cellular_component	2/593	4/15674	13.22	0.00814921	0.135705	ENSSSCG00000006333/ENSSSCG00000038543	2	down
GO:0005828	kinetochore microtubule	cellular_component	2/593	4/15674	13.22	0.00814921	0.135705	ENSSSCG00000023296/ENSSSCG00000039546	2	down
GO:0005811	lipid droplet	cellular_component	6/593	47/15674	3.37	0.00821473	0.135705	ENSSSCG00000001844/ENSSSCG00000003018/ENSSSCG00000007346/ENSSSCG00000008648/ENSSSCG00000024162/ENSSSCG00000027266	6	up&down
GO:0031526	brush border membrane	cellular_component	4/593	22/15674	4.81	0.00861892	0.135705	ENSSSCG00000012138/ENSSSCG00000015405/ENSSSCG00000016516/ENSSSCG00000023186	4	up
GO:0009986	cell surface	cellular_component	16/593	218/15674	1.94	0.00886017	0.135705	ENSSSCG00000003017/ENSSSCG00000007116/ENSSSCG00000007649/ENSSSCG00000009486/ENSSSCG00000010772/ENSSSCG00000012138/ENSSSCG00000014369/ENSSSCG00000015253/ENSSSCG00000017121/ENSSSCG00000024655/ENSSSCG00000025020/ENSSSCG00000035299/ENSSSCG00000035355/ENSSSCG00000035859/ENSSSCG00000036305/ENSSSCG00000039103	16	up&down
GO:0043020	NADPH oxidase complex	cellular_component	3/593	12/15674	6.61	0.00918004	0.135705	ENSSSCG00000000137/ENSSSCG00000015559/ENSSSCG00000036246	3	up
GO:0043005	neuron projection	cellular_component	13/593	165/15674	2.08	0.00999901	0.136577	ENSSSCG00000002827/ENSSSCG00000012754/ENSSSCG00000015253/ENSSSCG00000015579/ENSSSCG00000016230/ENSSSCG00000016672/ENSSSCG00000016810/ENSSSCG00000017121/ENSSSCG00000026850/ENSSSCG00000030309/ENSSSCG00000031590/ENSSSCG00000032722/ENSSSCG00000038675	13	up&down
GO:0000776	kinetochore	cellular_component	6/593	49/15674	3.24	0.0100424	0.136577	ENSSSCG00000003931/ENSSSCG00000004466/ENSSSCG00000011207/ENSSSCG00000023296/ENSSSCG00000027984/ENSSSCG00000040486	6	down
GO:0005765	lysosomal membrane	cellular_component	7/593	65/15674	2.85	0.0111711	0.146083	ENSSSCG00000008769/ENSSSCG00000010277/ENSSSCG00000011470/ENSSSCG00000013114/ENSSSCG00000017956/ENSSSCG00000018051/ENSSSCG00000023762	7	up
GO:0099738	cell cortex region	cellular_component	2/593	5/15674	10.57	0.0132427	0.16676	ENSSSCG00000007522/ENSSSCG00000016658	2	up&down
GO:0044306	neuron projection terminus	cellular_component	3/593	15/15674	5.29	0.0174522	0.210874	ENSSSCG00000011723/ENSSSCG00000022945/ENSSSCG00000026850	3	up&down
GO:0043235	receptor complex	cellular_component	9/593	106/15674	2.24	0.0190332	0.210874	ENSSSCG00000008103/ENSSSCG00000009468/ENSSSCG00000010629/ENSSSCG00000013004/ENSSSCG00000014007/ENSSSCG00000015405/ENSSSCG00000016230/ENSSSCG00000023746/ENSSSCG00000038675	9	up&down
GO:0000777	condensed chromosome kinetochore	cellular_component	2/593	6/15674	8.81	0.0193695	0.210874	ENSSSCG00000015924/ENSSSCG00000040486	2	down
GO:0032133	chromosome passenger complex	cellular_component	2/593	6/15674	8.81	0.0193695	0.210874	ENSSSCG00000032909/ENSSSCG00000040486	2	down
GO:0005942	phosphatidylinositol 3-kinase complex	cellular_component	3/593	16/15674	4.96	0.0208874	0.210874	ENSSSCG00000003909/ENSSSCG00000027272/ENSSSCG00000040581	3	up&down
GO:0005769	early endosome	cellular_component	8/593	91/15674	2.32	0.0217987	0.210874	ENSSSCG00000008966/ENSSSCG00000011723/ENSSSCG00000016992/ENSSSCG00000025020/ENSSSCG00000026422/ENSSSCG00000035355/ENSSSCG00000039556/ENSSSCG00000040321	8	up&down
GO:0005911	cell-cell junction	cellular_component	8/593	91/15674	2.32	0.0217987	0.210874	ENSSSCG00000006475/ENSSSCG00000006800/ENSSSCG00000013553/ENSSSCG00000016780/ENSSSCG00000016810/ENSSSCG00000017006/ENSSSCG00000027160/ENSSSCG00000040513	8	up&down
GO:0030424	axon	cellular_component	9/593	109/15674	2.18	0.0223983	0.210874	ENSSSCG00000011723/ENSSSCG00000012077/ENSSSCG00000015253/ENSSSCG00000015398/ENSSSCG00000016230/ENSSSCG00000017121/ENSSSCG00000026850/ENSSSCG00000030309/ENSSSCG00000031590	9	up&down
GO:0005819	spindle	cellular_component	5/593	43/15674	3.07	0.0224254	0.210874	ENSSSCG00000004466/ENSSSCG00000007235/ENSSSCG00000007351/ENSSSCG00000026850/ENSSSCG00000040486	5	up&down
GO:0048471	perinuclear region of cytoplasm	cellular_component	15/593	226/15674	1.75	0.0251817	0.210874	ENSSSCG00000002315/ENSSSCG00000006160/ENSSSCG00000008509/ENSSSCG00000012077/ENSSSCG00000012584/ENSSSCG00000015253/ENSSSCG00000017607/ENSSSCG00000023186/ENSSSCG00000023915/ENSSSCG00000025020/ENSSSCG00000026422/ENSSSCG00000026850/ENSSSCG00000026890/ENSSSCG00000032341/ENSSSCG00000039103	15	up&down
GO:0032809	neuronal cell body membrane	cellular_component	2/593	7/15674	7.55	0.0264443	0.210874	ENSSSCG00000002827/ENSSSCG00000017121	2	up&down
GO:0005770	late endosome	cellular_component	5/593	46/15674	2.87	0.0291399	0.210874	ENSSSCG00000008966/ENSSSCG00000025020/ENSSSCG00000035355/ENSSSCG00000039556/ENSSSCG00000039798	5	up
GO:0098794	postsynapse	cellular_component	6/593	62/15674	2.56	0.029345	0.210874	ENSSSCG00000003524/ENSSSCG00000012754/ENSSSCG00000016810/ENSSSCG00000017868/ENSSSCG00000035859/ENSSSCG00000038706	6	up
GO:0099055	integral component of postsynaptic membrane	cellular_component	2/593	8/15674	6.61	0.0343868	0.210874	ENSSSCG00000011470/ENSSSCG00000016230	2	up&down
GO:0014069	postsynaptic density of dendrite	cellular_component	7/593	82/15674	2.26	0.0354487	0.210874	ENSSSCG00000002315/ENSSSCG00000012077/ENSSSCG00000016780/ENSSSCG00000016810/ENSSSCG00000020736/ENSSSCG00000034609/ENSSSCG00000037539	7	up&down
GO:0002141	stereocilia ankle link	cellular_component	1/593	1/15674	26.43	0.0378334	0.210874	ENSSSCG00000005490	1	up
GO:0002142	stereocilia ankle link complex	cellular_component	1/593	1/15674	26.43	0.0378334	0.210874	ENSSSCG00000005490	1	up
GO:0016028	rhabdomere	cellular_component	1/593	1/15674	26.43	0.0378334	0.210874	ENSSSCG00000008103	1	up
GO:0031021	interphase microtubule organizing center	cellular_component	1/593	1/15674	26.43	0.0378334	0.210874	ENSSSCG00000040486	1	down
GO:0032010	phagolysosome	cellular_component	1/593	1/15674	26.43	0.0378334	0.210874	ENSSSCG00000010772	1	up
GO:0032127	dense core granule membrane	cellular_component	1/593	1/15674	26.43	0.0378334	0.210874	ENSSSCG00000010772	1	up
GO:0032155	cell division site part	cellular_component	1/593	1/15674	26.43	0.0378334	0.210874	ENSSSCG00000016658	1	down
GO:0036398	TCR signalosome	cellular_component	1/593	1/15674	26.43	0.0378334	0.210874	ENSSSCG00000017006	1	up
GO:0044215	other organism	cellular_component	1/593	1/15674	26.43	0.0378334	0.210874	ENSSSCG00000015662	1	up
GO:0044216	other organism cell	cellular_component	1/593	1/15674	26.43	0.0378334	0.210874	ENSSSCG00000015662	1	up
GO:0044217	other organism part	cellular_component	1/593	1/15674	26.43	0.0378334	0.210874	ENSSSCG00000015662	1	up
GO:0044327	dendritic spine head	cellular_component	1/593	1/15674	26.43	0.0378334	0.210874	ENSSSCG00000012077	1	down
GO:0071065	alpha9-beta1 integrin-vascular cell adhesion molecule-1 complex	cellular_component	1/593	1/15674	26.43	0.0378334	0.210874	ENSSSCG00000010772	1	up
GO:0071133	alpha9-beta1 integrin-ADAM8 complex	cellular_component	1/593	1/15674	26.43	0.0378334	0.210874	ENSSSCG00000010772	1	up
GO:0098844	postsynaptic endocytic zone membrane	cellular_component	1/593	1/15674	26.43	0.0378334	0.210874	ENSSSCG00000012077	1	down
GO:0099031	anchored component of postsynaptic density membrane	cellular_component	1/593	1/15674	26.43	0.0378334	0.210874	ENSSSCG00000033581	1	up
GO:1990666	PCSK9-LDLR complex	cellular_component	1/593	1/15674	26.43	0.0378334	0.210874	ENSSSCG00000025020	1	up
GO:1990667	PCSK9-AnxA2 complex	cellular_component	1/593	1/15674	26.43	0.0378334	0.210874	ENSSSCG00000025020	1	up
GO:1990696	USH2 complex	cellular_component	1/593	1/15674	26.43	0.0378334	0.210874	ENSSSCG00000005490	1	up
GO:0005783	endoplasmic reticulum	cellular_component	25/593	454/15674	1.46	0.0393083	0.215562	ENSSSCG00000002383/ENSSSCG00000003088/ENSSSCG00000006560/ENSSSCG00000007522/ENSSSCG00000007649/ENSSSCG00000009330/ENSSSCG00000009975/ENSSSCG00000010451/ENSSSCG00000013886/ENSSSCG00000014861/ENSSSCG00000015287/ENSSSCG00000015476/ENSSSCG00000015579/ENSSSCG00000016420/ENSSSCG00000016810/ENSSSCG00000017258/ENSSSCG00000017607/ENSSSCG00000025020/ENSSSCG00000026422/ENSSSCG00000029305/ENSSSCG00000030113/…	25	up&down
GO:0000779	condensed chromosome, centromeric region	cellular_component	2/593	9/15674	5.87	0.0431216	0.225693	ENSSSCG00000023296/ENSSSCG00000040486	2	down
GO:0032432	actin filament bundle	cellular_component	2/593	9/15674	5.87	0.0431216	0.225693	ENSSSCG00000009412/ENSSSCG00000038618	2	up&down
GO:0071944	cell periphery	cellular_component	13/593	202/15674	1.7	0.0437085	0.225693	ENSSSCG00000004572/ENSSSCG00000008294/ENSSSCG00000010893/ENSSSCG00000011453/ENSSSCG00000015253/ENSSSCG00000015662/ENSSSCG00000016658/ENSSSCG00000017006/ENSSSCG00000018050/ENSSSCG00000024655/ENSSSCG00000025271/ENSSSCG00000026850/ENSSSCG00000039103	13	up&down
GO:0015629	actin cytoskeleton	cellular_component	9/593	123/15674	1.93	0.043811	0.225693	ENSSSCG00000007085/ENSSSCG00000008294/ENSSSCG00000010568/ENSSSCG00000013604/ENSSSCG00000016658/ENSSSCG00000016855/ENSSSCG00000017694/ENSSSCG00000022722/ENSSSCG00000039546	9	up&down
GO:0016323	basolateral plasma membrane	cellular_component	6/593	70/15674	2.27	0.0488024	0.247654	ENSSSCG00000001841/ENSSSCG00000012363/ENSSSCG00000029371/ENSSSCG00000039556/ENSSSCG00000040348/ENSSSCG00000040513	6	up&down
