# Supplementary material for: Transcriptome and Metabolome Analyses Provide Insight into the Glucose-Induced Adipogenesis in Porcine Adipocytes
Source: Curr Issues Mol Biol. 2024 Mar 3;46(3):2027–42. doi: 10.3390/cimb46030131 (PMC10968871; doi:10.3390/cimb46030131)
Supplement: Supplementary file 1 [file cimb-46-00131-s001.zip › Table S5. KEGG enrichment analysis of DEGs between LG and HG groups.xlsx]

## Sheet: Sheet1
Table S5. KEGG enrichment analysis of DEGs between LG and HG groups
Gene ID	Description	GeneRatio	BgRatio	enrich_factor	pvalue	qvalue	geneID	Count	regulated
ko03320	PPAR signaling pathway	0.0472	0.0097	4.88	2.91739e-09	7.49308e-07	ENSSSCG00000001539;ENSSSCG00000001844;ENSSSCG00000004454;ENSSSCG00000006153;ENSSSCG00000007435;ENSSSCG00000008737;ENSSSCG00000010554;ENSSSCG00000010992;ENSSSCG00000011250;ENSSSCG00000011579;ENSSSCG00000013512;ENSSSCG00000013879;ENSSSCG00000014257;ENSSSCG00000015405;ENSSSCG00000015784;ENSSSCG00000016199;ENSSSCG00000032213;ENSSSCG00000036883;ENSSSCG00000039103;ENSSSCG00000040681
ko04145	Phagosome	0.066	0.0203	3.25	3.19495e-08	4.10299e-06	ENSSSCG00000000137;ENSSSCG00000001455;ENSSSCG00000001469;ENSSSCG00000005503;ENSSSCG00000006350;ENSSSCG00000006578;ENSSSCG00000006648;ENSSSCG00000006979;ENSSSCG00000007754;ENSSSCG00000009002;ENSSSCG00000009672;ENSSSCG00000010948;ENSSSCG00000011038;ENSSSCG00000013545;ENSSSCG00000013579;ENSSSCG00000014117;ENSSSCG00000014369;ENSSSCG00000015405;ENSSSCG00000015559;ENSSSCG00000015716;ENSSSCG00000016216;…
ko05140	Leishmaniasis	0.0377	0.0085	4.45	4.35749e-07	3.73062e-05	ENSSSCG00000000137;ENSSSCG00000001455;ENSSSCG00000001469;ENSSSCG00000002383;ENSSSCG00000003017;ENSSSCG00000005503;ENSSSCG00000007754;ENSSSCG00000008090;ENSSSCG00000009002;ENSSSCG00000015559;ENSSSCG00000015579;ENSSSCG00000025133;ENSSSCG00000025537;ENSSSCG00000036246;ENSSSCG00000036618;ENSSSCG00000037775
ko04610	Complement and coagulation cascades	0.0377	0.0089	4.25	8.29514e-07	5.32635e-05	ENSSSCG00000003524;ENSSSCG00000006289;ENSSSCG00000007754;ENSSSCG00000010893;ENSSSCG00000013418;ENSSSCG00000015662;ENSSSCG00000016859;ENSSSCG00000024310;ENSSSCG00000025133;ENSSSCG00000029371;ENSSSCG00000033512;ENSSSCG00000035170;ENSSSCG00000035355;ENSSSCG00000037582;ENSSSCG00000038706;Sus_scrofa_newGene_1473
ko04380	Osteoclast differentiation	0.0472	0.0142	3.32	2.17393e-06	0.000111672	ENSSSCG00000000137;ENSSSCG00000002383;ENSSSCG00000002919;ENSSSCG00000003017;ENSSSCG00000003278;ENSSSCG00000003909;ENSSSCG00000004898;ENSSSCG00000006350;ENSSSCG00000008090;ENSSSCG00000008147;ENSSSCG00000011579;ENSSSCG00000013237;ENSSSCG00000014441;ENSSSCG00000015559;ENSSSCG00000017006;ENSSSCG00000026742;ENSSSCG00000032282;ENSSSCG00000036618;ENSSSCG00000039270;ENSSSCG00000041738
ko04662	B cell receptor signaling pathway	0.033	0.0093	3.56	3.31944e-05	0.00142095	ENSSSCG00000002383;ENSSSCG00000003278;ENSSSCG00000003909;ENSSSCG00000005311;ENSSSCG00000006350;ENSSSCG00000008509;ENSSSCG00000010509;ENSSSCG00000013553;ENSSSCG00000016298;ENSSSCG00000021944;ENSSSCG00000025537;ENSSSCG00000026742;ENSSSCG00000037775;ENSSSCG00000041738
ko04923	Regulation of lipolysis in adipocytes	0.0236	0.0058	4.05	0.000147754	0.00542135	ENSSSCG00000001844;ENSSSCG00000003018;ENSSSCG00000003909;ENSSSCG00000007665;ENSSSCG00000010992;ENSSSCG00000013388;ENSSSCG00000015579;ENSSSCG00000021059;ENSSSCG00000027952;ENSSSCG00000040681
ko05133	Pertussis	0.0283	0.0085	3.33	0.000227197	0.00657592	ENSSSCG00000002383;ENSSSCG00000003524;ENSSSCG00000005503;ENSSSCG00000007754;ENSSSCG00000008090;ENSSSCG00000008953;ENSSSCG00000013940;ENSSSCG00000014369;ENSSSCG00000015662;ENSSSCG00000025133;ENSSSCG00000033512;ENSSSCG00000038706
ko04640	Hematopoietic cell lineage	0.033	0.0111	2.99	0.000230427	0.00657592	ENSSSCG00000001455;ENSSSCG00000001469;ENSSSCG00000007754;ENSSSCG00000008090;ENSSSCG00000009486;ENSSSCG00000011723;ENSSSCG00000014369;ENSSSCG00000014441;ENSSSCG00000015405;ENSSSCG00000022849;ENSSSCG00000030088;ENSSSCG00000035495;ENSSSCG00000037466;ENSSSCG00000037775
ko05152	Tuberculosis	0.0472	0.0198	2.38	0.000284498	0.00677227	ENSSSCG00000001455;ENSSSCG00000001469;ENSSSCG00000003017;ENSSSCG00000005503;ENSSSCG00000006350;ENSSSCG00000006357;ENSSSCG00000006648;ENSSSCG00000007754;ENSSSCG00000008090;ENSSSCG00000009002;ENSSSCG00000011038;ENSSSCG00000011436;ENSSSCG00000013579;ENSSSCG00000014369;ENSSSCG00000015085;ENSSSCG00000016516;ENSSSCG00000025133;ENSSSCG00000036618;ENSSSCG00000037775;ENSSSCG00000038055
ko01040	Biosynthesis of unsaturated fatty acids	0.0165	0.0032	5.23	0.000290042	0.00677227	ENSSSCG00000001045;ENSSSCG00000010554;ENSSSCG00000011250;ENSSSCG00000024149;ENSSSCG00000028080;ENSSSCG00000031299;ENSSSCG00000036236
ko01212	Fatty acid metabolism	0.0236	0.0064	3.68	0.000336509	0.00720248	ENSSSCG00000001045;ENSSSCG00000010554;ENSSSCG00000011250;ENSSSCG00000015784;ENSSSCG00000017694;ENSSSCG00000024149;ENSSSCG00000028080;ENSSSCG00000029944;ENSSSCG00000031299;ENSSSCG00000036236
ko05150	Staphylococcus aureus infection	0.0377	0.0146	2.58	0.000455996	0.00900915	ENSSSCG00000001455;ENSSSCG00000001469;ENSSSCG00000003524;ENSSSCG00000006350;ENSSSCG00000007754;ENSSSCG00000010893;ENSSSCG00000013418;ENSSSCG00000025133;ENSSSCG00000029371;ENSSSCG00000031788;ENSSSCG00000033512;ENSSSCG00000036618;ENSSSCG00000037775;ENSSSCG00000038706;Sus_scrofa_newGene_1473;Sus_scrofa_newGene_4446
ko04914	Progesterone-mediated oocyte maturation	0.0283	0.0097	2.93	0.00076784	0.0140867	ENSSSCG00000003558;ENSSSCG00000003909;ENSSSCG00000004588;ENSSSCG00000007493;ENSSSCG00000010214;ENSSSCG00000012307;ENSSSCG00000013388;ENSSSCG00000026748;ENSSSCG00000027952;ENSSSCG00000029326;ENSSSCG00000029509;ENSSSCG00000030469
ko04062	Chemokine signaling pathway	0.0401	0.0177	2.27	0.00134477	0.0222486	ENSSSCG00000003909;ENSSSCG00000007240;ENSSSCG00000008953;ENSSSCG00000008959;ENSSSCG00000009956;ENSSSCG00000011322;ENSSSCG00000013553;ENSSSCG00000017008;ENSSSCG00000017918;ENSSSCG00000021944;ENSSSCG00000027272;ENSSSCG00000027952;ENSSSCG00000033457;ENSSSCG00000034722;ENSSSCG00000035736;ENSSSCG00000036747;ENSSSCG00000037579
ko04650	Natural killer cell mediated cytotoxicity	0.0307	0.0117	2.61	0.00138598	0.0222486	ENSSSCG00000002918;ENSSSCG00000002919;ENSSSCG00000003909;ENSSSCG00000006357;ENSSSCG00000006379;ENSSSCG00000013553;ENSSSCG00000017006;ENSSSCG00000021944;ENSSSCG00000025133;ENSSSCG00000025537;ENSSSCG00000026816;ENSSSCG00000036618;ENSSSCG00000037775
ko04024	cAMP signaling pathway	0.0472	0.023	2.05	0.00183071	0.027659	ENSSSCG00000000443;ENSSSCG00000002383;ENSSSCG00000003018;ENSSSCG00000003805;ENSSSCG00000003909;ENSSSCG00000006560;ENSSSCG00000008421;ENSSSCG00000013388;ENSSSCG00000013553;ENSSSCG00000016403;ENSSSCG00000016672;ENSSSCG00000017498;ENSSSCG00000017874;ENSSSCG00000021059;ENSSSCG00000021374;ENSSSCG00000021944;ENSSSCG00000027952;ENSSSCG00000029635;ENSSSCG00000035355;ENSSSCG00000036363
ko04061	Viral protein interaction with cytokine and cytokine receptor	0.0236	0.0081	2.91	0.00213776	0.0305037	ENSSSCG00000008953;ENSSSCG00000008959;ENSSSCG00000011322;ENSSSCG00000014441;ENSSSCG00000015085;ENSSSCG00000022849;ENSSSCG00000033457;ENSSSCG00000034722;ENSSSCG00000035736;ENSSSCG00000037579
ko04152	AMPK signaling pathway	0.0307	0.0127	2.41	0.00286653	0.0387497	ENSSSCG00000003018;ENSSSCG00000003909;ENSSSCG00000006560;ENSSSCG00000007665;ENSSSCG00000009661;ENSSSCG00000010554;ENSSSCG00000011579;ENSSSCG00000015405;ENSSSCG00000017694;ENSSSCG00000023915;ENSSSCG00000024814;ENSSSCG00000029944;ENSSSCG00000039103
ko04664	Fc epsilon RI signaling pathway	0.0212	0.0074	2.87	0.00392431	0.0503964	ENSSSCG00000003909;ENSSSCG00000006357;ENSSSCG00000009330;ENSSSCG00000013553;ENSSSCG00000016298;ENSSSCG00000017006;ENSSSCG00000021944;ENSSSCG00000026742;ENSSSCG00000037775
ko05323	Rheumatoid arthritis	0.0354	0.0165	2.15	0.00430779	0.0525813	ENSSSCG00000001455;ENSSSCG00000001469;ENSSSCG00000002383;ENSSSCG00000003017;ENSSSCG00000004898;ENSSSCG00000005503;ENSSSCG00000008090;ENSSSCG00000008953;ENSSSCG00000008959;ENSSSCG00000009002;ENSSSCG00000010948;ENSSSCG00000016516;ENSSSCG00000025133;ENSSSCG00000032282;ENSSSCG00000037775
ko05030	Cocaine addiction	0.0165	0.0049	3.35	0.00450389	0.0525813	ENSSSCG00000006560;ENSSSCG00000009601;ENSSSCG00000017121;ENSSSCG00000017498;ENSSSCG00000027952;ENSSSCG00000029635;ENSSSCG00000035402
ko00062	Fatty acid elongation	0.0118	0.0028	4.27	0.0055534	0.0620151	ENSSSCG00000001045;ENSSSCG00000024149;ENSSSCG00000028080;ENSSSCG00000031299;ENSSSCG00000036236
ko05032	Morphine addiction	0.0236	0.0093	2.54	0.00579916	0.0620612	ENSSSCG00000003805;ENSSSCG00000009956;ENSSSCG00000012754;ENSSSCG00000013388;ENSSSCG00000014097;ENSSSCG00000017918;ENSSSCG00000021059;ENSSSCG00000021902;ENSSSCG00000027952;ENSSSCG00000036363
ko04666	Fc gamma R-mediated phagocytosis	0.0236	0.0097	2.44	0.00775324	0.0770947	ENSSSCG00000003909;ENSSSCG00000006350;ENSSSCG00000007240;ENSSSCG00000010908;ENSSSCG00000013553;ENSSSCG00000016298;ENSSSCG00000021944;ENSSSCG00000036618;ENSSSCG00000036747;ENSSSCG00000037775
ko04670	Leukocyte transendothelial migration	0.0259	0.0113	2.31	0.00810442	0.0770947	ENSSSCG00000000137;ENSSSCG00000003909;ENSSSCG00000006862;ENSSSCG00000007436;ENSSSCG00000007754;ENSSSCG00000013553;ENSSSCG00000015559;ENSSSCG00000021944;ENSSSCG00000025133;ENSSSCG00000026816;ENSSSCG00000036246
ko04931	Insulin resistance	0.0259	0.0113	2.31	0.00810442	0.0770947	ENSSSCG00000003558;ENSSSCG00000003909;ENSSSCG00000006560;ENSSSCG00000007710;ENSSSCG00000010184;ENSSSCG00000013879;ENSSSCG00000014257;ENSSSCG00000015405;ENSSSCG00000023915;ENSSSCG00000026816;ENSSSCG00000039862
ko04114	Oocyte meiosis	0.0283	0.013	2.17	0.00923906	0.0831	ENSSSCG00000000265;ENSSSCG00000003558;ENSSSCG00000003949;ENSSSCG00000004588;ENSSSCG00000007493;ENSSSCG00000010214;ENSSSCG00000011207;ENSSSCG00000017032;ENSSSCG00000026748;ENSSSCG00000027952;ENSSSCG00000029326;ENSSSCG00000030469
ko04360	Axon guidance	0.0354	0.018	1.97	0.0093828	0.0831	ENSSSCG00000000896;ENSSSCG00000003909;ENSSSCG00000006495;ENSSSCG00000009613;ENSSSCG00000012787;ENSSSCG00000014224;ENSSSCG00000015396;ENSSSCG00000015398;ENSSSCG00000016230;ENSSSCG00000021944;ENSSSCG00000023784;ENSSSCG00000026816;ENSSSCG00000033624;ENSSSCG00000035176;ENSSSCG00000035859
ko01230	Biosynthesis of amino acids	0.0212	0.0086	2.47	0.0103406	0.0857889	ENSSSCG00000000856;ENSSSCG00000002847;ENSSSCG00000004195;ENSSSCG00000005287;ENSSSCG00000006717;ENSSSCG00000012926;ENSSSCG00000015340;ENSSSCG00000017759;ENSSSCG00000036208
ko04620	Toll-like receptor signaling pathway	0.0283	0.0132	2.14	0.0103544	0.0857889	ENSSSCG00000002383;ENSSSCG00000003909;ENSSSCG00000005503;ENSSSCG00000006578;ENSSSCG00000008953;ENSSSCG00000009002;ENSSSCG00000011436;ENSSSCG00000012118;ENSSSCG00000014369;ENSSSCG00000015801;ENSSSCG00000016573;ENSSSCG00000031053
ko05146	Amoebiasis	0.0259	0.0119	2.17	0.0124138	0.0996367	ENSSSCG00000003017;ENSSSCG00000003909;ENSSSCG00000004195;ENSSSCG00000005503;ENSSSCG00000007754;ENSSSCG00000008953;ENSSSCG00000008959;ENSSSCG00000009002;ENSSSCG00000014369;ENSSSCG00000025133;ENSSSCG00000037775
ko04068	FoxO signaling pathway	0.0283	0.0139	2.03	0.0150957	0.117491	ENSSSCG00000003017;ENSSSCG00000003909;ENSSSCG00000004588;ENSSSCG00000007665;ENSSSCG00000012307;ENSSSCG00000018050;ENSSSCG00000023915;ENSSSCG00000024325;ENSSSCG00000026748;ENSSSCG00000029326;ENSSSCG00000029507;ENSSSCG00000038911
ko04072	Phospholipase D signaling pathway	0.0307	0.0158	1.94	0.016718	0.124481	ENSSSCG00000000130;ENSSSCG00000001435;ENSSSCG00000003909;ENSSSCG00000006357;ENSSSCG00000008953;ENSSSCG00000010184;ENSSSCG00000015355;ENSSSCG00000026816;ENSSSCG00000027272;ENSSSCG00000027952;ENSSSCG00000035355;ENSSSCG00000035495;ENSSSCG00000037775
ko04975	Fat digestion and absorption	0.0142	0.0049	2.87	0.017364	0.124481	ENSSSCG00000001435;ENSSSCG00000013879;ENSSSCG00000014861;ENSSSCG00000015405;ENSSSCG00000034102;ENSSSCG00000038322
ko00230	Purine metabolism	0.0283	0.0142	1.99	0.0175695	0.124481	ENSSSCG00000003805;ENSSSCG00000003812;ENSSSCG00000013388;ENSSSCG00000014097;ENSSSCG00000027952;ENSSSCG00000029761;ENSSSCG00000030016;ENSSSCG00000031741;ENSSSCG00000032424;ENSSSCG00000035218;ENSSSCG00000035818;ENSSSCG00000036363
ko00561	Glycerolipid metabolism	0.0165	0.0064	2.57	0.0184171	0.124481	ENSSSCG00000001435;ENSSSCG00000008624;ENSSSCG00000014861;ENSSSCG00000015355;ENSSSCG00000027266;ENSSSCG00000034102;ENSSSCG00000038322
ko05031	Amphetamine addiction	0.0165	0.0064	2.57	0.0184171	0.124481	ENSSSCG00000002383;ENSSSCG00000006560;ENSSSCG00000009601;ENSSSCG00000017121;ENSSSCG00000017498;ENSSSCG00000027952;ENSSSCG00000029635
ko04614	Renin-angiotensin system	0.0094	0.0025	3.82	0.0190437	0.125416	ENSSSCG00000009132;ENSSSCG00000010184;ENSSSCG00000011723;ENSSSCG00000012138
ko04022	cGMP-PKG signaling pathway	0.0307	0.0164	1.87	0.0219856	0.141171	ENSSSCG00000002315;ENSSSCG00000006560;ENSSSCG00000006788;ENSSSCG00000007139;ENSSSCG00000007665;ENSSSCG00000009477;ENSSSCG00000009661;ENSSSCG00000010629;ENSSSCG00000013388;ENSSSCG00000017874;ENSSSCG00000021059;ENSSSCG00000027272;ENSSSCG00000027952
ko05134	Legionellosis	0.0165	0.0067	2.46	0.0230691	0.144515	ENSSSCG00000005503;ENSSSCG00000007754;ENSSSCG00000008953;ENSSSCG00000008959;ENSSSCG00000009002;ENSSSCG00000014369;ENSSSCG00000025133
ko04979	Cholesterol metabolism	0.0142	0.0053	2.65	0.024567	0.144677	ENSSSCG00000003088;ENSSSCG00000007435;ENSSSCG00000015405;ENSSSCG00000016199;ENSSSCG00000025020;ENSSSCG00000037539
ko00650	Butanoate metabolism	0.0094	0.0027	3.54	0.0247496	0.144677	ENSSSCG00000007857;ENSSSCG00000009755;ENSSSCG00000016863;ENSSSCG00000026453
ko05221	Acute myeloid leukemia	0.0165	0.0068	2.42	0.0247848	0.144677	ENSSSCG00000001539;ENSSSCG00000002866;ENSSSCG00000003909;ENSSSCG00000007754;ENSSSCG00000013237;ENSSSCG00000014369;ENSSSCG00000014441
ko00430	Taurine and hypotaurine metabolism	0.0071	0.0016	4.48	0.0271568	0.152216	ENSSSCG00000000259;ENSSSCG00000010055;ENSSSCG00000010056
ko04110	Cell cycle	0.0259	0.0134	1.93	0.0272617	0.152216	ENSSSCG00000000265;ENSSSCG00000003017;ENSSSCG00000003949;ENSSSCG00000004466;ENSSSCG00000004588;ENSSSCG00000010214;ENSSSCG00000012307;ENSSSCG00000017032;ENSSSCG00000026748;ENSSSCG00000029326;ENSSSCG00000030469
ko05020	Prion disease	0.0472	0.0298	1.58	0.0285727	0.156142	ENSSSCG00000000137;ENSSSCG00000000439;ENSSSCG00000003524;ENSSSCG00000003909;ENSSSCG00000006560;ENSSSCG00000008090;ENSSSCG00000013545;ENSSSCG00000013778;ENSSSCG00000014336;ENSSSCG00000015559;ENSSSCG00000016216;ENSSSCG00000016859;ENSSSCG00000021944;ENSSSCG00000029635;ENSSSCG00000033512;ENSSSCG00000033958;ENSSSCG00000036246;ENSSSCG00000038384;ENSSSCG00000038706;ENSSSCG00000044553
ko04010	MAPK signaling pathway	0.0495	0.032	1.55	0.0310139	0.165952	ENSSSCG00000002383;ENSSSCG00000002960;ENSSSCG00000003017;ENSSSCG00000003558;ENSSSCG00000006160;ENSSSCG00000007198;ENSSSCG00000008090;ENSSSCG00000008509;ENSSSCG00000010831;ENSSSCG00000010959;ENSSSCG00000013020;ENSSSCG00000014007;ENSSSCG00000014258;ENSSSCG00000014369;ENSSSCG00000014441;ENSSSCG00000015850;ENSSSCG00000017918;ENSSSCG00000018050;ENSSSCG00000021944;ENSSSCG00000035495;ENSSSCG00000044553
ko00260	Glycine, serine and threonine metabolism	0.0118	0.0043	2.72	0.0356535	0.186884	ENSSSCG00000005287;ENSSSCG00000006717;ENSSSCG00000014108;ENSSSCG00000017383;ENSSSCG00000036208
ko01200	Carbon metabolism	0.0236	0.0124	1.9	0.0383582	0.19704	ENSSSCG00000002847;ENSSSCG00000004454;ENSSSCG00000005287;ENSSSCG00000006717;ENSSSCG00000007286;ENSSSCG00000012926;ENSSSCG00000016751;ENSSSCG00000017759;ENSSSCG00000025751;ENSSSCG00000036208
ko04928	Parathyroid hormone synthesis, secretion and action	0.0212	0.011	1.94	0.0427981	0.215536	ENSSSCG00000002383;ENSSSCG00000003805;ENSSSCG00000006132;ENSSSCG00000006560;ENSSSCG00000014336;ENSSSCG00000014362;ENSSSCG00000017918;ENSSSCG00000027952;ENSSSCG00000036363
ko05034	Alcoholism	0.0259	0.0145	1.79	0.044288	0.21875	ENSSSCG00000006163;ENSSSCG00000006560;ENSSSCG00000009178;ENSSSCG00000009601;ENSSSCG00000010277;ENSSSCG00000010959;ENSSSCG00000017121;ENSSSCG00000017498;ENSSSCG00000027952;ENSSSCG00000029635;ENSSSCG00000039307
ko00910	Nitrogen metabolism	0.0071	0.002	3.58	0.0489032	0.236989	ENSSSCG00000006141;ENSSSCG00000012141;ENSSSCG00000023186
ko04611	Platelet activation	0.0236	0.013	1.81	0.0500074	0.237852	ENSSSCG00000003909;ENSSSCG00000006357;ENSSSCG00000009486;ENSSSCG00000011721;ENSSSCG00000013041;ENSSSCG00000017006;ENSSSCG00000026742;ENSSSCG00000027272;ENSSSCG00000027952;ENSSSCG00000035355
ko00620	Pyruvate metabolism	0.0118	0.0048	2.44	0.0529536	0.24287	ENSSSCG00000004454;ENSSSCG00000007286;ENSSSCG00000012926;ENSSSCG00000017694;ENSSSCG00000025751
ko04930	Type II diabetes mellitus	0.0118	0.0048	2.44	0.0529536	0.24287	ENSSSCG00000003909;ENSSSCG00000007665;ENSSSCG00000016751;ENSSSCG00000023915;ENSSSCG00000039103
ko00061	Fatty acid biosynthesis	0.0071	0.0022	3.26	0.0621609	0.280097	ENSSSCG00000015784;ENSSSCG00000017694;ENSSSCG00000029944
ko04060	Cytokine-cytokine receptor interaction	0.0425	0.0288	1.47	0.064707	0.284168	ENSSSCG00000000136;ENSSSCG00000000442;ENSSSCG00000003017;ENSSSCG00000004898;ENSSSCG00000008090;ENSSSCG00000008953;ENSSSCG00000008959;ENSSSCG00000011322;ENSSSCG00000014441;ENSSSCG00000015085;ENSSSCG00000016810;ENSSSCG00000022849;ENSSSCG00000030088;ENSSSCG00000033457;ENSSSCG00000034722;ENSSSCG00000035736;ENSSSCG00000037579;ENSSSCG00000040961
ko04974	Protein digestion and absorption	0.0212	0.0119	1.78	0.0669327	0.284168	ENSSSCG00000002032;ENSSSCG00000002041;ENSSSCG00000002315;ENSSSCG00000007358;ENSSSCG00000009975;ENSSSCG00000011723;ENSSSCG00000012138;ENSSSCG00000017086;ENSSSCG00000039556
ko05205	Proteoglycans in cancer	0.033	0.0212	1.56	0.0673527	0.284168	ENSSSCG00000003017;ENSSSCG00000003909;ENSSSCG00000005503;ENSSSCG00000007436;ENSSSCG00000009002;ENSSSCG00000009237;ENSSSCG00000010948;ENSSSCG00000011884;ENSSSCG00000012680;ENSSSCG00000013553;ENSSSCG00000014362;ENSSSCG00000025537;ENSSSCG00000026816;ENSSSCG00000035859
ko04142	Lysosome	0.0259	0.0156	1.66	0.0674898	0.284168	ENSSSCG00000006648;ENSSSCG00000007522;ENSSSCG00000008769;ENSSSCG00000010948;ENSSSCG00000016516;ENSSSCG00000017956;ENSSSCG00000025034;ENSSSCG00000032282;ENSSSCG00000037539;ENSSSCG00000039798;ENSSSCG00000040847
ko04910	Insulin signaling pathway	0.0259	0.0158	1.64	0.0724187	0.300003	ENSSSCG00000003018;ENSSSCG00000003022;ENSSSCG00000003909;ENSSSCG00000007665;ENSSSCG00000007682;ENSSSCG00000013388;ENSSSCG00000016751;ENSSSCG00000017694;ENSSSCG00000018050;ENSSSCG00000023915;ENSSSCG00000029944
ko04080	Neuroactive ligand-receptor interaction	0.0495	0.0353	1.4	0.0741409	0.302262	ENSSSCG00000006788;ENSSSCG00000007139;ENSSSCG00000008421;ENSSSCG00000009477;ENSSSCG00000009661;ENSSSCG00000010184;ENSSSCG00000010629;ENSSSCG00000011721;ENSSSCG00000012754;ENSSSCG00000016403;ENSSSCG00000016672;ENSSSCG00000017868;ENSSSCG00000021059;ENSSSCG00000021902;ENSSSCG00000029371;ENSSSCG00000029635;ENSSSCG00000031788;ENSSSCG00000032722;ENSSSCG00000035355;ENSSSCG00000037582;Sus_scrofa_newGene_…
ko00630	Glyoxylate and dicarboxylate metabolism	0.0094	0.0038	2.45	0.0787522	0.316045	ENSSSCG00000007286;ENSSSCG00000010523;ENSSSCG00000025751;ENSSSCG00000036208
ko04920	Adipocytokine signaling pathway	0.0165	0.0089	1.86	0.0824961	0.325976	ENSSSCG00000007665;ENSSSCG00000008737;ENSSSCG00000015405;ENSSSCG00000015784;ENSSSCG00000023915;ENSSSCG00000026816;ENSSSCG00000039103
ko00514	Other types of O-glycan biosynthesis	0.0118	0.0055	2.13	0.0840792	0.327198	ENSSSCG00000015567;ENSSSCG00000025770;ENSSSCG00000026457;ENSSSCG00000026890;ENSSSCG00000030209
ko05144	Malaria	0.0212	0.0126	1.68	0.0880844	0.337668	ENSSSCG00000003017;ENSSSCG00000005503;ENSSSCG00000006862;ENSSSCG00000008953;ENSSSCG00000009002;ENSSSCG00000011436;ENSSSCG00000014117;ENSSSCG00000015405;ENSSSCG00000025133
ko05200	Pathways in cancer	0.0684	0.0527	1.3	0.0894891	0.338008	ENSSSCG00000000136;ENSSSCG00000000443;ENSSSCG00000000709;ENSSSCG00000001539;ENSSSCG00000002383;ENSSSCG00000002866;ENSSSCG00000002960;ENSSSCG00000003017;ENSSSCG00000003909;ENSSSCG00000007436;ENSSSCG00000008509;ENSSSCG00000008953;ENSSSCG00000009477;ENSSSCG00000010184;ENSSSCG00000011579;ENSSSCG00000013237;ENSSSCG00000014007;ENSSSCG00000014441;ENSSSCG00000015579;ENSSSCG00000017265;ENSSSCG00000021944;…
ko04371	Apelin signaling pathway	0.0259	0.0165	1.57	0.0914418	0.338841	ENSSSCG00000001844;ENSSSCG00000002315;ENSSSCG00000003018;ENSSSCG00000003022;ENSSSCG00000010190;ENSSSCG00000013388;ENSSSCG00000014336;ENSSSCG00000027272;ENSSSCG00000027952;ENSSSCG00000033958;ENSSSCG00000038911
ko04917	Prolactin signaling pathway	0.0142	0.0074	1.91	0.0933887	0.338841	ENSSSCG00000002383;ENSSSCG00000003909;ENSSSCG00000004898;ENSSSCG00000008421;ENSSSCG00000016751;ENSSSCG00000040581
ko04211	Longevity regulating pathway	0.0165	0.0092	1.8	0.0943237	0.338841	ENSSSCG00000003909;ENSSSCG00000006560;ENSSSCG00000007665;ENSSSCG00000011579;ENSSSCG00000027952;ENSSSCG00000029438;ENSSSCG00000039103
ko05418	Fluid shear stress and atherosclerosis	0.0236	0.0147	1.6	0.0949867	0.338841	ENSSSCG00000002383;ENSSSCG00000003909;ENSSSCG00000006862;ENSSSCG00000007436;ENSSSCG00000008090;ENSSSCG00000010948;ENSSSCG00000015559;ENSSSCG00000021944;ENSSSCG00000032580;ENSSSCG00000038911
ko04933	AGE-RAGE signaling pathway in diabetic complications	0.0189	0.0111	1.71	0.0971347	0.341757	ENSSSCG00000003017;ENSSSCG00000003909;ENSSSCG00000006862;ENSSSCG00000008090;ENSSSCG00000008953;ENSSSCG00000010184;ENSSSCG00000014336;ENSSSCG00000036246
ko05206	MicroRNAs in cancer	0.0259	0.0168	1.55	0.100443	0.34862	ENSSSCG00000003909;ENSSSCG00000004969;ENSSSCG00000006132;ENSSSCG00000007436;ENSSSCG00000009482;ENSSSCG00000013008;ENSSSCG00000015390;ENSSSCG00000015579;ENSSSCG00000032456;ENSSSCG00000035073;ENSSSCG00000035284
ko04932	Non-alcoholic fatty liver disease	0.0259	0.0172	1.51	0.113232	0.387771	ENSSSCG00000002383;ENSSSCG00000002866;ENSSSCG00000003017;ENSSSCG00000003909;ENSSSCG00000007710;ENSSSCG00000008090;ENSSSCG00000008953;ENSSSCG00000013778;ENSSSCG00000038384;ENSSSCG00000039103;ENSSSCG00000044553
ko04976	Bile secretion	0.0165	0.0097	1.71	0.116011	0.392058	ENSSSCG00000004597;ENSSSCG00000015390;ENSSSCG00000027952;ENSSSCG00000032456;ENSSSCG00000033207;ENSSSCG00000035073;ENSSSCG00000036274
ko00860	Porphyrin and chlorophyll metabolism	0.0094	0.0045	2.08	0.125144	0.417431	ENSSSCG00000012363;ENSSSCG00000030461;ENSSSCG00000036274;ENSSSCG00000039861
ko05204	Chemical carcinogenesis	0.0118	0.0064	1.84	0.13533	0.445622	ENSSSCG00000015579;ENSSSCG00000015616;ENSSSCG00000032580;ENSSSCG00000033207;ENSSSCG00000036274
ko00020	Citrate cycle (TCA cycle)	0.0071	0.0031	2.31	0.138489	0.446078	ENSSSCG00000012926;ENSSSCG00000017421;ENSSSCG00000025751
ko04668	TNF signaling pathway	0.0189	0.012	1.57	0.138942	0.446078	ENSSSCG00000002383;ENSSSCG00000003909;ENSSSCG00000006560;ENSSSCG00000006862;ENSSSCG00000007436;ENSSSCG00000008959;ENSSSCG00000015579;ENSSSCG00000040961
ko05135	Yersinia infection	0.0307	0.0222	1.38	0.149573	0.468997	ENSSSCG00000002383;ENSSSCG00000003558;ENSSSCG00000003909;ENSSSCG00000005503;ENSSSCG00000008953;ENSSSCG00000013553;ENSSSCG00000013940;ENSSSCG00000016855;ENSSSCG00000017006;ENSSSCG00000021944;ENSSSCG00000028317;ENSSSCG00000036747;ENSSSCG00000037775
ko05322	Systemic lupus erythematosus	0.0236	0.0162	1.46	0.149733	0.468997	ENSSSCG00000001455;ENSSSCG00000001469;ENSSSCG00000003524;ENSSSCG00000009178;ENSSSCG00000016859;ENSSSCG00000033512;ENSSSCG00000036618;ENSSSCG00000037775;ENSSSCG00000038706;ENSSSCG00000039307
ko04261	Adrenergic signaling in cardiomyocytes	0.0236	0.0163	1.45	0.153863	0.476125	ENSSSCG00000000298;ENSSSCG00000002315;ENSSSCG00000006560;ENSSSCG00000007139;ENSSSCG00000009661;ENSSSCG00000010184;ENSSSCG00000017874;ENSSSCG00000027272;ENSSSCG00000027952;ENSSSCG00000039556
ko04115	p53 signaling pathway	0.0142	0.0087	1.63	0.162582	0.497118	ENSSSCG00000000002;ENSSSCG00000004588;ENSSSCG00000010214;ENSSSCG00000029326;ENSSSCG00000029438;ENSSSCG00000031741
ko00270	Cysteine and methionine metabolism	0.0094	0.0051	1.84	0.172065	0.51513	ENSSSCG00000005287;ENSSSCG00000006717;ENSSSCG00000014108;ENSSSCG00000025751
ko00670	One carbon pool by folate	0.0047	0.0018	2.65	0.172484	0.51513	ENSSSCG00000030626;ENSSSCG00000036208
ko00983	Drug metabolism - other enzymes	0.0118	0.007	1.68	0.175612	0.518444	ENSSSCG00000002825;ENSSSCG00000031741;ENSSSCG00000032580;ENSSSCG00000036274;ENSSSCG00000039985
ko05210	Colorectal cancer	0.0142	0.009	1.58	0.181039	0.524305	ENSSSCG00000002383;ENSSSCG00000003017;ENSSSCG00000003909;ENSSSCG00000017265;ENSSSCG00000021944;ENSSSCG00000040486
ko04015	Rap1 signaling pathway	0.0354	0.0272	1.3	0.18168	0.524305	ENSSSCG00000003909;ENSSSCG00000007198;ENSSSCG00000007754;ENSSSCG00000008509;ENSSSCG00000011721;ENSSSCG00000013553;ENSSSCG00000014007;ENSSSCG00000014441;ENSSSCG00000016855;ENSSSCG00000017006;ENSSSCG00000021944;ENSSSCG00000025133;ENSSSCG00000027952;ENSSSCG00000035355;ENSSSCG00000035495
ko00982	Drug metabolism - cytochrome P450	0.0094	0.0053	1.77	0.1889	0.539083	ENSSSCG00000015267;ENSSSCG00000015268;ENSSSCG00000032580;ENSSSCG00000036274
ko04624	Toll and Imd signaling pathway	0.0024	0.0005	4.78	0.192496	0.540561	ENSSSCG00000025560
ko04728	Dopaminergic synapse	0.0189	0.0131	1.44	0.193627	0.540561	ENSSSCG00000000439;ENSSSCG00000002383;ENSSSCG00000006560;ENSSSCG00000009601;ENSSSCG00000017121;ENSSSCG00000017498;ENSSSCG00000017918;ENSSSCG00000027952
ko04924	Renin secretion	0.0118	0.0073	1.61	0.197281	0.544841	ENSSSCG00000010184;ENSSSCG00000013388;ENSSSCG00000016672;ENSSSCG00000021059;ENSSSCG00000027952
ko05161	Hepatitis B	0.0236	0.0174	1.36	0.202866	0.549264	ENSSSCG00000002383;ENSSSCG00000003017;ENSSSCG00000003909;ENSSSCG00000005503;ENSSSCG00000006560;ENSSSCG00000007436;ENSSSCG00000008953;ENSSSCG00000009002;ENSSSCG00000015801;ENSSSCG00000040486
ko00360	Phenylalanine metabolism	0.0047	0.002	2.39	0.20316	0.549264	ENSSSCG00000000856;ENSSSCG00000017383
ko05145	Toxoplasmosis	0.0165	0.0114	1.45	0.206396	0.5522	ENSSSCG00000001455;ENSSSCG00000001469;ENSSSCG00000003017;ENSSSCG00000005503;ENSSSCG00000009002;ENSSSCG00000015085;ENSSSCG00000027272
ko04926	Relaxin signaling pathway	0.0189	0.0134	1.41	0.209918	0.555832	ENSSSCG00000002383;ENSSSCG00000003017;ENSSSCG00000003909;ENSSSCG00000006560;ENSSSCG00000007436;ENSSSCG00000009477;ENSSSCG00000017918;ENSSSCG00000027952
ko05132	Salmonella infection	0.033	0.0261	1.27	0.216811	0.564324	ENSSSCG00000000130;ENSSSCG00000000295;ENSSSCG00000002383;ENSSSCG00000005503;ENSSSCG00000006578;ENSSSCG00000008953;ENSSSCG00000009002;ENSSSCG00000010908;ENSSSCG00000011436;ENSSSCG00000013940;ENSSSCG00000014369;ENSSSCG00000027272;ENSSSCG00000027935;ENSSSCG00000031053
ko00220	Arginine biosynthesis	0.0047	0.0021	2.28	0.21872	0.564324	ENSSSCG00000002847;ENSSSCG00000004195
ko05142	Chagas disease	0.0236	0.0178	1.33	0.222171	0.564324	ENSSSCG00000002383;ENSSSCG00000003017;ENSSSCG00000003524;ENSSSCG00000003909;ENSSSCG00000005503;ENSSSCG00000008953;ENSSSCG00000009002;ENSSSCG00000011436;ENSSSCG00000033512;ENSSSCG00000038706
ko00980	Metabolism of xenobiotics by cytochrome P450	0.0094	0.0057	1.65	0.224005	0.564324	ENSSSCG00000015616;ENSSSCG00000032580;ENSSSCG00000033207;ENSSSCG00000036274
ko04725	Cholinergic synapse	0.0165	0.0116	1.42	0.224601	0.564324	ENSSSCG00000002383;ENSSSCG00000003909;ENSSSCG00000003975;ENSSSCG00000006560;ENSSSCG00000027272;ENSSSCG00000027952;ENSSSCG00000039556
ko00524	Neomycin, kanamycin and gentamicin biosynthesis	0.0024	0.0006	3.98	0.226308	0.564324	ENSSSCG00000016751
ko00480	Glutathione metabolism	0.0094	0.0058	1.62	0.233036	0.566778	ENSSSCG00000010055;ENSSSCG00000010056;ENSSSCG00000031741;ENSSSCG00000032580
ko05219	Bladder cancer	0.0071	0.0039	1.79	0.233855	0.566778	ENSSSCG00000007436;ENSSSCG00000008953;ENSSSCG00000014362
ko01522	Endocrine resistance	0.0142	0.0098	1.45	0.233912	0.566778	ENSSSCG00000002383;ENSSSCG00000003909;ENSSSCG00000007436;ENSSSCG00000014362;ENSSSCG00000026422;ENSSSCG00000027952
ko00562	Inositol phosphate metabolism	0.0118	0.0079	1.49	0.243087	0.578103	ENSSSCG00000011557;ENSSSCG00000016298;ENSSSCG00000024162;ENSSSCG00000027272;ENSSSCG00000040524
ko00590	Arachidonic acid metabolism	0.0118	0.0079	1.49	0.243087	0.578103	ENSSSCG00000005474;ENSSSCG00000010055;ENSSSCG00000010056;ENSSSCG00000015579;ENSSSCG00000032480
ko00250	Alanine, aspartate and glutamate metabolism	0.0071	0.0041	1.71	0.256499	0.593276	ENSSSCG00000002847;ENSSSCG00000015340;ENSSSCG00000017861
ko05033	Nicotine addiction	0.0071	0.0041	1.71	0.256499	0.593276	ENSSSCG00000012754;ENSSSCG00000021902;ENSSSCG00000029635
ko00400	Phenylalanine, tyrosine and tryptophan biosynthesis	0.0024	0.0007	3.41	0.258707	0.593276	ENSSSCG00000000856
ko04013	MAPK signaling pathway - fly	0.0024	0.0007	3.41	0.258707	0.593276	ENSSSCG00000029507
ko05166	Human T-cell leukemia virus 1 infection	0.0354	0.0293	1.21	0.262545	0.596748	ENSSSCG00000000265;ENSSSCG00000001455;ENSSSCG00000001469;ENSSSCG00000002383;ENSSSCG00000003017;ENSSSCG00000003909;ENSSSCG00000003949;ENSSSCG00000004588;ENSSSCG00000006560;ENSSSCG00000013237;ENSSSCG00000014336;ENSSSCG00000017032;ENSSSCG00000022849;ENSSSCG00000025133;ENSSSCG00000027952
ko04964	Proximal tubule bicarbonate reclamation	0.0047	0.0024	1.99	0.265838	0.598933	ENSSSCG00000023186;ENSSSCG00000025751
ko05414	Dilated cardiomyopathy	0.0165	0.0123	1.34	0.269051	0.6009	ENSSSCG00000002315;ENSSSCG00000003017;ENSSSCG00000009281;ENSSSCG00000010184;ENSSSCG00000017874;ENSSSCG00000027952;ENSSSCG00000037775
ko05164	Influenza A	0.0236	0.0188	1.26	0.273305	0.60514	ENSSSCG00000001455;ENSSSCG00000001469;ENSSSCG00000003909;ENSSSCG00000005503;ENSSSCG00000008090;ENSSSCG00000008648;ENSSSCG00000008953;ENSSSCG00000012077;ENSSSCG00000013940;ENSSSCG00000015801
ko04150	mTOR signaling pathway	0.0236	0.0189	1.25	0.278612	0.611618	ENSSSCG00000003558;ENSSSCG00000003909;ENSSSCG00000008624;ENSSSCG00000013292;ENSSSCG00000017551;ENSSSCG00000018050;ENSSSCG00000029438;ENSSSCG00000029507;ENSSSCG00000032996;ENSSSCG00000035859
ko04216	Ferroptosis	0.0094	0.0064	1.47	0.288796	0.625385	ENSSSCG00000009169;ENSSSCG00000015784;ENSSSCG00000022649;ENSSSCG00000036246
ko00740	Riboflavin metabolism	0.0024	0.0008	2.99	0.289753	0.625385	ENSSSCG00000032282
ko00830	Retinol metabolism	0.0094	0.0065	1.45	0.298284	0.632471	ENSSSCG00000000362;ENSSSCG00000000419;ENSSSCG00000028996;ENSSSCG00000036274
ko05340	Primary immunodeficiency	0.0071	0.0045	1.56	0.302528	0.632471	ENSSSCG00000010908;ENSSSCG00000026742;ENSSSCG00000037775
ko04270	Vascular smooth muscle contraction	0.0189	0.015	1.26	0.304324	0.632471	ENSSSCG00000000146;ENSSSCG00000007139;ENSSSCG00000008294;ENSSSCG00000009661;ENSSSCG00000010184;ENSSSCG00000010190;ENSSSCG00000027952;ENSSSCG00000031144
ko04064	NF-kappa B signaling pathway	0.0212	0.0172	1.24	0.305349	0.632471	ENSSSCG00000004898;ENSSSCG00000005503;ENSSSCG00000006862;ENSSSCG00000008953;ENSSSCG00000008959;ENSSSCG00000014369;ENSSSCG00000015579;ENSSSCG00000026742;ENSSSCG00000037775
ko04630	JAK-STAT signaling pathway	0.0212	0.0172	1.24	0.305349	0.632471	ENSSSCG00000000136;ENSSSCG00000003909;ENSSSCG00000015085;ENSSSCG00000022849;ENSSSCG00000025537;ENSSSCG00000026816;ENSSSCG00000030088;ENSSSCG00000040581;ENSSSCG00000040961
ko03440	Homologous recombination	0.0071	0.0046	1.53	0.314118	0.635265	ENSSSCG00000017571;ENSSSCG00000026991;ENSSSCG00000032315
ko04913	Ovarian steroidogenesis	0.0071	0.0046	1.53	0.314118	0.635265	ENSSSCG00000008421;ENSSSCG00000015579;ENSSSCG00000027952
ko05143	African trypanosomiasis	0.0071	0.0046	1.53	0.314118	0.635265	ENSSSCG00000006862;ENSSSCG00000011436;ENSSSCG00000037775
ko04070	Phosphatidylinositol signaling system	0.0142	0.011	1.29	0.32037	0.642848	ENSSSCG00000003909;ENSSSCG00000009231;ENSSSCG00000011557;ENSSSCG00000015355;ENSSSCG00000016298;ENSSSCG00000024162
ko04927	Cortisol synthesis and secretion	0.0094	0.0068	1.39	0.326943	0.649102	ENSSSCG00000006560;ENSSSCG00000010184;ENSSSCG00000014097;ENSSSCG00000027952
ko00790	Folate biosynthesis	0.0047	0.0028	1.71	0.328542	0.649102	ENSSSCG00000000856;ENSSSCG00000010826
ko04727	GABAergic synapse	0.0118	0.0091	1.3	0.34112	0.664919	ENSSSCG00000012754;ENSSSCG00000017427;ENSSSCG00000021902;ENSSSCG00000025981;ENSSSCG00000027952
ko04810	Regulation of actin cytoskeleton	0.0283	0.0245	1.16	0.344486	0.664919	ENSSSCG00000000146;ENSSSCG00000000295;ENSSSCG00000003909;ENSSSCG00000006475;ENSSSCG00000007754;ENSSSCG00000009448;ENSSSCG00000011511;ENSSSCG00000013553;ENSSSCG00000021944;ENSSSCG00000025133;ENSSSCG00000026211;ENSSSCG00000035355
ko00010	Glycolysis / Gluconeogenesis	0.0094	0.007	1.35	0.346147	0.664919	ENSSSCG00000003812;ENSSSCG00000007286;ENSSSCG00000016751;ENSSSCG00000017759
ko04320	Dorso-ventral axis formation	0.0024	0.001	2.39	0.348007	0.664919	ENSSSCG00000029507
ko04540	Gap junction	0.0118	0.0092	1.28	0.349491	0.664919	ENSSSCG00000010214;ENSSSCG00000013545;ENSSSCG00000016216;ENSSSCG00000018050;ENSSSCG00000027952
ko04915	Estrogen signaling pathway	0.0165	0.0136	1.21	0.356593	0.673441	ENSSSCG00000002383;ENSSSCG00000003909;ENSSSCG00000006560;ENSSSCG00000007436;ENSSSCG00000014362;ENSSSCG00000026422;ENSSSCG00000027952
ko04340	Hedgehog signaling pathway	0.0071	0.0051	1.38	0.372002	0.693513	ENSSSCG00000000443;ENSSSCG00000009956;ENSSSCG00000017918
ko04071	Sphingolipid signaling pathway	0.0142	0.0116	1.21	0.37288	0.693513	ENSSSCG00000003909;ENSSSCG00000006357;ENSSSCG00000006788;ENSSSCG00000021059;ENSSSCG00000021944;ENSSSCG00000034213
ko00750	Vitamin B6 metabolism	0.0024	0.0011	2.17	0.375321	0.693513	ENSSSCG00000005287
ko01524	Platinum drug resistance	0.0094	0.0075	1.26	0.394145	0.716746	ENSSSCG00000003909;ENSSSCG00000017473;ENSSSCG00000032580;ENSSSCG00000040486
ko05412	Arrhythmogenic right ventricular cardiomyopathy	0.0094	0.0075	1.26	0.394145	0.716746	ENSSSCG00000002315;ENSSSCG00000009281;ENSSSCG00000010144;ENSSSCG00000017874
ko05231	Choline metabolism in cancer	0.0118	0.0098	1.21	0.399813	0.716746	ENSSSCG00000002383;ENSSSCG00000003909;ENSSSCG00000015355;ENSSSCG00000021944;ENSSSCG00000036747
ko00072	Synthesis and degradation of ketone bodies	0.0024	0.0012	1.99	0.401493	0.716746	ENSSSCG00000016863
ko02010	ABC transporters	0.0094	0.0076	1.24	0.403697	0.716746	ENSSSCG00000007899;ENSSSCG00000015390;ENSSSCG00000032456;ENSSSCG00000035073
ko00601	Glycosphingolipid biosynthesis - lacto and neolacto series	0.0047	0.0033	1.45	0.404638	0.716746	ENSSSCG00000013886;ENSSSCG00000034351
ko04657	IL-17 signaling pathway	0.0118	0.01	1.18	0.416531	0.72292	ENSSSCG00000002383;ENSSSCG00000007436;ENSSSCG00000008953;ENSSSCG00000008959;ENSSSCG00000015579
ko04922	Glucagon signaling pathway	0.0118	0.01	1.18	0.416531	0.72292	ENSSSCG00000006560;ENSSSCG00000013388;ENSSSCG00000016751;ENSSSCG00000017694;ENSSSCG00000024814
ko00030	Pentose phosphate pathway	0.0047	0.0034	1.41	0.419382	0.72292	ENSSSCG00000003812;ENSSSCG00000017759
ko00512	Mucin type O-glycan biosynthesis	0.0047	0.0034	1.41	0.419382	0.72292	ENSSSCG00000026457;ENSSSCG00000026890
ko00280	Valine, leucine and isoleucine degradation	0.0071	0.0056	1.26	0.428917	0.729562	ENSSSCG00000009755;ENSSSCG00000011250;ENSSSCG00000016863
ko00520	Amino sugar and nucleotide sugar metabolism	0.0071	0.0056	1.26	0.428917	0.729562	ENSSSCG00000003812;ENSSSCG00000016751;ENSSSCG00000022292
ko00051	Fructose and mannose metabolism	0.0047	0.0035	1.37	0.433939	0.733248	ENSSSCG00000017759;ENSSSCG00000024814
ko05162	Measles	0.0236	0.0217	1.09	0.440704	0.737482	ENSSSCG00000002383;ENSSSCG00000003909;ENSSSCG00000005503;ENSSSCG00000006350;ENSSSCG00000008090;ENSSSCG00000009002;ENSSSCG00000011436;ENSSSCG00000012077;ENSSSCG00000013579;ENSSSCG00000022849
ko05012	Parkinson disease	0.0283	0.0264	1.07	0.442187	0.737482	ENSSSCG00000000439;ENSSSCG00000009601;ENSSSCG00000013545;ENSSSCG00000013778;ENSSSCG00000016216;ENSSSCG00000017121;ENSSSCG00000022945;ENSSSCG00000023379;ENSSSCG00000027952;ENSSSCG00000033958;ENSSSCG00000038384;ENSSSCG00000044553
ko04625	C-type lectin receptor signaling pathway	0.0142	0.0127	1.11	0.455541	0.750014	ENSSSCG00000003909;ENSSSCG00000006357;ENSSSCG00000013579;ENSSSCG00000013940;ENSSSCG00000015579;ENSSSCG00000026816
ko04722	Neurotrophin signaling pathway	0.0142	0.0127	1.11	0.455541	0.750014	ENSSSCG00000003558;ENSSSCG00000003909;ENSSSCG00000007682;ENSSSCG00000010959;ENSSSCG00000026816;ENSSSCG00000037539
ko05202	Transcriptional misregulation in cancer	0.0259	0.0244	1.06	0.460441	0.751746	ENSSSCG00000002866;ENSSSCG00000007436;ENSSSCG00000007754;ENSSSCG00000008953;ENSSSCG00000011579;ENSSSCG00000013237;ENSSSCG00000014369;ENSSSCG00000014441;ENSSSCG00000029227;ENSSSCG00000037775;ENSSSCG00000044553
ko04215	Apoptosis - multiple species	0.0047	0.0037	1.29	0.462447	0.751746	ENSSSCG00000017643;ENSSSCG00000040486
ko05235	PD-L1 expression and PD-1 checkpoint pathway in cancer	0.0165	0.0152	1.09	0.46682	0.754082	ENSSSCG00000002383;ENSSSCG00000003909;ENSSSCG00000005503;ENSSSCG00000009002;ENSSSCG00000011436;ENSSSCG00000025537;ENSSSCG00000026816
ko04714	Thermogenesis	0.0259	0.0247	1.05	0.476561	0.754236	ENSSSCG00000001844;ENSSSCG00000003018;ENSSSCG00000003558;ENSSSCG00000006560;ENSSSCG00000011579;ENSSSCG00000013778;ENSSSCG00000015784;ENSSSCG00000026297;ENSSSCG00000027952;ENSSSCG00000038384;ENSSSCG00000039618
ko04520	Adherens junction	0.0094	0.0084	1.12	0.478721	0.754236	ENSSSCG00000005620;ENSSSCG00000021944;ENSSSCG00000025537;ENSSSCG00000036747
ko04911	Insulin secretion	0.0094	0.0084	1.12	0.478721	0.754236	ENSSSCG00000006560;ENSSSCG00000016672;ENSSSCG00000016751;ENSSSCG00000027952
ko04151	PI3K-Akt signaling pathway	0.0377	0.0365	1.03	0.483383	0.754236	ENSSSCG00000003909;ENSSSCG00000005503;ENSSSCG00000006560;ENSSSCG00000007198;ENSSSCG00000009002;ENSSSCG00000010509;ENSSSCG00000010959;ENSSSCG00000014007;ENSSSCG00000014117;ENSSSCG00000014441;ENSSSCG00000022849;ENSSSCG00000024325;ENSSSCG00000027272;ENSSSCG00000035355;ENSSSCG00000035495;ENSSSCG00000037775
ko05226	Gastric cancer	0.0165	0.0156	1.06	0.49388	0.754236	ENSSSCG00000003017;ENSSSCG00000003909;ENSSSCG00000015390;ENSSSCG00000017265;ENSSSCG00000032456;ENSSSCG00000035073;ENSSSCG00000035859
ko05217	Basal cell carcinoma	0.0071	0.0062	1.14	0.494593	0.754236	ENSSSCG00000000443;ENSSSCG00000017265;ENSSSCG00000035859
ko04218	Cellular senescence	0.0189	0.018	1.05	0.495119	0.754236	ENSSSCG00000003017;ENSSSCG00000003909;ENSSSCG00000004588;ENSSSCG00000008090;ENSSSCG00000008953;ENSSSCG00000010214;ENSSSCG00000012307;ENSSSCG00000029326
ko05321	Inflammatory bowel disease	0.0142	0.0133	1.06	0.499647	0.754236	ENSSSCG00000001455;ENSSSCG00000001469;ENSSSCG00000003017;ENSSSCG00000005503;ENSSSCG00000008090;ENSSSCG00000009002
ko04217	Necroptosis	0.0189	0.0181	1.04	0.501369	0.754236	ENSSSCG00000005503;ENSSSCG00000005994;ENSSSCG00000008090;ENSSSCG00000009178;ENSSSCG00000013940;ENSSSCG00000015801;ENSSSCG00000036246;ENSSSCG00000039307
ko04213	Longevity regulating pathway - multiple species	0.0071	0.0063	1.12	0.505179	0.754236	ENSSSCG00000003909;ENSSSCG00000007665;ENSSSCG00000027952
ko05010	Alzheimer disease	0.0401	0.0396	1.01	0.514322	0.754236	ENSSSCG00000000439;ENSSSCG00000003088;ENSSSCG00000003909;ENSSSCG00000007665;ENSSSCG00000008090;ENSSSCG00000011723;ENSSSCG00000013545;ENSSSCG00000013778;ENSSSCG00000015579;ENSSSCG00000016216;ENSSSCG00000017265;ENSSSCG00000017874;ENSSSCG00000033958;ENSSSCG00000035859;ENSSSCG00000036246;ENSSSCG00000038384;ENSSSCG00000044553
ko04916	Melanogenesis	0.0118	0.0112	1.06	0.514386	0.754236	ENSSSCG00000006560;ENSSSCG00000009477;ENSSSCG00000027952;ENSSSCG00000035495;ENSSSCG00000035859
ko04370	VEGF signaling pathway	0.0071	0.0064	1.1	0.515649	0.754236	ENSSSCG00000003909;ENSSSCG00000015579;ENSSSCG00000021944
ko00120	Primary bile acid biosynthesis	0.0024	0.0017	1.41	0.516829	0.754236	ENSSSCG00000016199
ko01210	2-Oxocarboxylic acid metabolism	0.0024	0.0017	1.41	0.516829	0.754236	ENSSSCG00000002847
ko00500	Starch and sucrose metabolism	0.0047	0.004	1.17	0.516837	0.754236	ENSSSCG00000003812;ENSSSCG00000016751
ko00640	Propanoate metabolism	0.0047	0.004	1.17	0.516837	0.754236	ENSSSCG00000007286;ENSSSCG00000017694
ko04514	Cell adhesion molecules	0.0259	0.0256	1.01	0.524285	0.757882	ENSSSCG00000001455;ENSSSCG00000001469;ENSSSCG00000006287;ENSSSCG00000006862;ENSSSCG00000007146;ENSSSCG00000007754;ENSSSCG00000010908;ENSSSCG00000012787;ENSSSCG00000025133;ENSSSCG00000026180;Sus_scrofa_newGene_4446
ko04978	Mineral absorption	0.0071	0.0065	1.09	0.526	0.757882	ENSSSCG00000002315;ENSSSCG00000012363;ENSSSCG00000021581
ko04066	HIF-1 signaling pathway	0.0118	0.0114	1.04	0.530074	0.757882	ENSSSCG00000003909;ENSSSCG00000005503;ENSSSCG00000007198;ENSSSCG00000017759;ENSSSCG00000036246
ko05167	Kaposi sarcoma-associated herpesvirus infection	0.0212	0.0209	1.01	0.531139	0.757882	ENSSSCG00000002383;ENSSSCG00000003909;ENSSSCG00000007240;ENSSSCG00000008953;ENSSSCG00000008959;ENSSSCG00000011322;ENSSSCG00000015579;ENSSSCG00000015801;ENSSSCG00000027272
ko05211	Renal cell carcinoma	0.0071	0.0066	1.07	0.536227	0.760916	ENSSSCG00000003017;ENSSSCG00000003909;ENSSSCG00000026816
ko05410	Hypertrophic cardiomyopathy	0.0118	0.0115	1.02	0.545535	0.762818	ENSSSCG00000002315;ENSSSCG00000003017;ENSSSCG00000009281;ENSSSCG00000010184;ENSSSCG00000017874
ko04929	GnRH secretion	0.0071	0.0067	1.05	0.546329	0.762818	ENSSSCG00000003909;ENSSSCG00000017918;ENSSSCG00000026422
ko04721	Synaptic vesicle cycle	0.0094	0.0092	1.03	0.549827	0.762818	ENSSSCG00000002827;ENSSSCG00000009601;ENSSSCG00000016516;ENSSSCG00000017121
ko00052	Galactose metabolism	0.0047	0.0043	1.09	0.555165	0.762818	ENSSSCG00000003812;ENSSSCG00000016751
ko04962	Vasopressin-regulated water reabsorption	0.0047	0.0043	1.09	0.555165	0.762818	ENSSSCG00000006560;ENSSSCG00000040513
ko05230	Central carbon metabolism in cancer	0.0071	0.0068	1.04	0.556301	0.762818	ENSSSCG00000003909;ENSSSCG00000016751;ENSSSCG00000032996
ko04012	ErbB signaling pathway	0.0094	0.0093	1.02	0.558358	0.762818	ENSSSCG00000003909;ENSSSCG00000008965;ENSSSCG00000014362;ENSSSCG00000018050
ko05416	Viral myocarditis	0.0142	0.0142	1	0.563262	0.765447	ENSSSCG00000001455;ENSSSCG00000001469;ENSSSCG00000009281;ENSSSCG00000021944;ENSSSCG00000025133;ENSSSCG00000037775
ko04935	Growth hormone synthesis, secretion and action	0.0118	0.0119	0.99	0.575709	0.778244	ENSSSCG00000002383;ENSSSCG00000003909;ENSSSCG00000006560;ENSSSCG00000007665;ENSSSCG00000027952
ko05310	Asthma	0.0094	0.0096	0.99	0.583419	0.784537	ENSSSCG00000001455;ENSSSCG00000001469;ENSSSCG00000006357;ENSSSCG00000037775
ko01523	Antifolate resistance	0.0047	0.0046	1.02	0.59129	0.784967	ENSSSCG00000022236;ENSSSCG00000036208
ko04925	Aldosterone synthesis and secretion	0.0094	0.0097	0.98	0.591588	0.784967	ENSSSCG00000003018;ENSSSCG00000006560;ENSSSCG00000010184;ENSSSCG00000027952
ko00604	Glycosphingolipid biosynthesis - ganglio series	0.0024	0.0021	1.14	0.592907	0.784967	ENSSSCG00000008227
ko00071	Fatty acid degradation	0.0047	0.0047	1	0.602837	0.78852	ENSSSCG00000011250;ENSSSCG00000015784
ko00350	Tyrosine metabolism	0.0047	0.0047	1	0.602837	0.78852	ENSSSCG00000000062;ENSSSCG00000017383
ko04512	ECM-receptor interaction	0.0118	0.0123	0.96	0.604801	0.78852	ENSSSCG00000001434;ENSSSCG00000009486;ENSSSCG00000014117;ENSSSCG00000015405;ENSSSCG00000017022
ko00053	Ascorbate and aldarate metabolism	0.0024	0.0022	1.09	0.60998	0.791256	ENSSSCG00000036274
ko04918	Thyroid hormone synthesis	0.0071	0.0074	0.96	0.613285	0.791544	ENSSSCG00000004678;ENSSSCG00000006560;ENSSSCG00000027952
ko04912	GnRH signaling pathway	0.0094	0.0102	0.93	0.630986	0.802507	ENSSSCG00000014336;ENSSSCG00000014362;ENSSSCG00000018050;ENSSSCG00000027952
ko04970	Salivary secretion	0.0094	0.0102	0.93	0.630986	0.802507	ENSSSCG00000007139;ENSSSCG00000009661;ENSSSCG00000027952;ENSSSCG00000033958
ko05212	Pancreatic cancer	0.0071	0.0076	0.93	0.631152	0.802507	ENSSSCG00000003017;ENSSSCG00000003909;ENSSSCG00000021944
ko04723	Retrograde endocannabinoid signaling	0.0142	0.0154	0.92	0.641572	0.80437	ENSSSCG00000011470;ENSSSCG00000012754;ENSSSCG00000013778;ENSSSCG00000015579;ENSSSCG00000021902;ENSSSCG00000027952
ko04921	Oxytocin signaling pathway	0.0142	0.0154	0.92	0.641572	0.80437	ENSSSCG00000002383;ENSSSCG00000015579;ENSSSCG00000023762;ENSSSCG00000027272;ENSSSCG00000027952;ENSSSCG00000033958
ko00100	Steroid biosynthesis	0.0024	0.0024	1	0.642013	0.80437	ENSSSCG00000013004
ko05220	Chronic myeloid leukemia	0.0071	0.0078	0.91	0.648442	0.808481	ENSSSCG00000003017;ENSSSCG00000003909;ENSSSCG00000026816
ko00531	Glycosaminoglycan degradation	0.0024	0.0025	0.96	0.657031	0.809846	ENSSSCG00000009237
ko00563	Glycosylphosphatidylinositol (GPI)-anchor biosynthesis	0.0024	0.0025	0.96	0.657031	0.809846	ENSSSCG00000026706
ko00564	Glycerophospholipid metabolism	0.0094	0.0106	0.89	0.660697	0.809846	ENSSSCG00000001435;ENSSSCG00000008624;ENSSSCG00000009231;ENSSSCG00000015355
ko00040	Pentose and glucuronate interconversions	0.0024	0.0026	0.92	0.67142	0.809846	ENSSSCG00000036274
ko00340	Histidine metabolism	0.0024	0.0026	0.92	0.67142	0.809846	ENSSSCG00000017861
ko04950	Maturity onset diabetes of the young	0.0024	0.0026	0.92	0.67142	0.809846	ENSSSCG00000016751
ko04934	Cushing syndrome	0.0142	0.0159	0.89	0.671608	0.809846	ENSSSCG00000006560;ENSSSCG00000010184;ENSSSCG00000014097;ENSSSCG00000017265;ENSSSCG00000027952;ENSSSCG00000035859
ko00140	Steroid hormone biosynthesis	0.0047	0.0055	0.85	0.686372	0.817162	ENSSSCG00000015616;ENSSSCG00000036274
ko04972	Pancreatic secretion	0.0094	0.011	0.86	0.68875	0.817162	ENSSSCG00000017874;ENSSSCG00000027952;ENSSSCG00000035243;ENSSSCG00000039556
ko04713	Circadian entrainment	0.0094	0.0111	0.85	0.695501	0.817162	ENSSSCG00000002383;ENSSSCG00000016672;ENSSSCG00000027952;ENSSSCG00000033958
ko00592	alpha-Linolenic acid metabolism	0.0024	0.0028	0.85	0.698417	0.817162	ENSSSCG00000011250
ko04310	Wnt signaling pathway	0.0165	0.019	0.87	0.698569	0.817162	ENSSSCG00000001539;ENSSSCG00000004218;ENSSSCG00000016780;ENSSSCG00000017265;ENSSSCG00000021944;ENSSSCG00000035299;ENSSSCG00000035859
ko04014	Ras signaling pathway	0.0259	0.0293	0.88	0.704735	0.817162	ENSSSCG00000002960;ENSSSCG00000003909;ENSSSCG00000007198;ENSSSCG00000008509;ENSSSCG00000010959;ENSSSCG00000013839;ENSSSCG00000014007;ENSSSCG00000014441;ENSSSCG00000021944;ENSSSCG00000026816;ENSSSCG00000035495
ko03460	Fanconi anemia pathway	0.0047	0.0057	0.82	0.704864	0.817162	ENSSSCG00000005000;ENSSSCG00000017571
ko04977	Vitamin digestion and absorption	0.0024	0.0029	0.82	0.711074	0.817162	ENSSSCG00000039252
ko05213	Endometrial cancer	0.0047	0.0058	0.81	0.713765	0.817162	ENSSSCG00000003909;ENSSSCG00000017265
ko04660	T cell receptor signaling pathway	0.0142	0.0167	0.85	0.716224	0.817162	ENSSSCG00000002383;ENSSSCG00000003909;ENSSSCG00000010908;ENSSSCG00000013553;ENSSSCG00000017006;ENSSSCG00000025537
ko04020	Calcium signaling pathway	0.0259	0.0296	0.88	0.717015	0.817162	ENSSSCG00000002315;ENSSSCG00000007139;ENSSSCG00000008421;ENSSSCG00000009477;ENSSSCG00000009661;ENSSSCG00000017868;ENSSSCG00000017874;ENSSSCG00000031788;ENSSSCG00000033958;ENSSSCG00000035355;ENSSSCG00000037775
ko00310	Lysine degradation	0.0071	0.0087	0.81	0.719036	0.817162	ENSSSCG00000014030;ENSSSCG00000015567;ENSSSCG00000032157
ko04622	RIG-I-like receptor signaling pathway	0.0071	0.0087	0.81	0.719036	0.817162	ENSSSCG00000008953;ENSSSCG00000017416;ENSSSCG00000040575
ko05160	Hepatitis C	0.0142	0.0169	0.84	0.726701	0.822235	ENSSSCG00000003909;ENSSSCG00000008648;ENSSSCG00000010451;ENSSSCG00000010452;ENSSSCG00000012077;ENSSSCG00000015801
ko04720	Long-term potentiation	0.0047	0.006	0.78	0.730893	0.823025	ENSSSCG00000000298;ENSSSCG00000003558
ko04672	Intestinal immune network for IgA production	0.0094	0.0116	0.81	0.733808	0.823025	ENSSSCG00000001455;ENSSSCG00000001469;ENSSSCG00000003017;ENSSSCG00000037775
ko04966	Collecting duct acid secretion	0.0024	0.0032	0.75	0.745952	0.82736	ENSSSCG00000016516
ko04659	Th17 cell differentiation	0.0142	0.0174	0.81	0.751699	0.82736	ENSSSCG00000001455;ENSSSCG00000001469;ENSSSCG00000002383;ENSSSCG00000003017;ENSSSCG00000022849;ENSSSCG00000033381
ko00410	beta-Alanine metabolism	0.0024	0.0033	0.72	0.756618	0.82736	ENSSSCG00000017383
ko04744	Phototransduction	0.0024	0.0033	0.72	0.756618	0.82736	ENSSSCG00000035402
ko04550	Signaling pathways regulating pluripotency of stem cells	0.0118	0.0148	0.8	0.758361	0.82736	ENSSSCG00000000442;ENSSSCG00000003909;ENSSSCG00000017265;ENSSSCG00000035859;ENSSSCG00000040961
ko04146	Peroxisome	0.0071	0.0093	0.76	0.759664	0.82736	ENSSSCG00000011250;ENSSSCG00000015784;ENSSSCG00000027052
ko00240	Pyrimidine metabolism	0.0047	0.0064	0.74	0.762545	0.82736	ENSSSCG00000008647;ENSSSCG00000031741
ko05224	Breast cancer	0.0118	0.0149	0.79	0.763443	0.82736	ENSSSCG00000002383;ENSSSCG00000003909;ENSSSCG00000014007;ENSSSCG00000017265;ENSSSCG00000035859
ko05216	Thyroid cancer	0.0024	0.0034	0.7	0.766837	0.827416	ENSSSCG00000011579
ko00330	Arginine and proline metabolism	0.0047	0.0065	0.72	0.769937	0.827416	ENSSSCG00000004195;ENSSSCG00000010523
ko04130	SNARE interactions in vesicular transport	0.0024	0.0036	0.66	0.786009	0.83477	ENSSSCG00000000703
ko04392	Hippo signaling pathway - multiple species	0.0024	0.0036	0.66	0.786009	0.83477	ENSSSCG00000032601
ko05170	Human immunodeficiency virus 1 infection	0.0236	0.0289	0.82	0.789368	0.83477	ENSSSCG00000002383;ENSSSCG00000003909;ENSSSCG00000004588;ENSSSCG00000005503;ENSSSCG00000009002;ENSSSCG00000010214;ENSSSCG00000012307;ENSSSCG00000021944;ENSSSCG00000029326;ENSSSCG00000040847
ko05215	Prostate cancer	0.0071	0.0098	0.72	0.789782	0.83477	ENSSSCG00000003909;ENSSSCG00000006560;ENSSSCG00000007436
ko04960	Aldosterone-regulated sodium reabsorption	0.0024	0.0037	0.65	0.794997	0.836839	ENSSSCG00000003909
ko05223	Non-small cell lung cancer	0.0047	0.007	0.67	0.80396	0.83715	ENSSSCG00000003909;ENSSSCG00000035818
ko04260	Cardiac muscle contraction	0.0071	0.0101	0.7	0.806304	0.83715	ENSSSCG00000002315;ENSSSCG00000017874;ENSSSCG00000038384
ko04390	Hippo signaling pathway	0.0118	0.016	0.74	0.814109	0.83715	ENSSSCG00000003017;ENSSSCG00000017265;ENSSSCG00000025133;ENSSSCG00000035859;ENSSSCG00000040486
ko05100	Bacterial invasion of epithelial cells	0.0047	0.0072	0.65	0.816271	0.83715	ENSSSCG00000003909;ENSSSCG00000011884
ko05222	Small cell lung cancer	0.0071	0.0103	0.69	0.816702	0.83715	ENSSSCG00000003909;ENSSSCG00000015579;ENSSSCG00000035818
ko04530	Tight junction	0.0142	0.0191	0.74	0.824177	0.83715	ENSSSCG00000000146;ENSSSCG00000004366;ENSSSCG00000011511;ENSSSCG00000011884;ENSSSCG00000016216;ENSSSCG00000036747
ko04621	NOD-like receptor signaling pathway	0.0142	0.0191	0.74	0.824177	0.83715	ENSSSCG00000005503;ENSSSCG00000008953;ENSSSCG00000008959;ENSSSCG00000013940;ENSSSCG00000023762;ENSSSCG00000036246
ko05225	Hepatocellular carcinoma	0.0118	0.0163	0.72	0.826318	0.83715	ENSSSCG00000003017;ENSSSCG00000003909;ENSSSCG00000017265;ENSSSCG00000032580;ENSSSCG00000035859
ko05163	Human cytomegalovirus infection	0.0189	0.0247	0.76	0.82769	0.83715	ENSSSCG00000003909;ENSSSCG00000006560;ENSSSCG00000008953;ENSSSCG00000011322;ENSSSCG00000015085;ENSSSCG00000015579;ENSSSCG00000021944;ENSSSCG00000027952
ko04742	Taste transduction	0.0047	0.0074	0.64	0.827886	0.83715	ENSSSCG00000011721;Sus_scrofa_newGene_181
ko04971	Gastric acid secretion	0.0047	0.0076	0.62	0.838837	0.844897	ENSSSCG00000027952;ENSSSCG00000039556
ko04726	Serotonergic synapse	0.0071	0.011	0.65	0.849437	0.851526	ENSSSCG00000009601;ENSSSCG00000015579;ENSSSCG00000027952
ko04510	Focal adhesion	0.0165	0.0228	0.72	0.856055	0.851526	ENSSSCG00000003909;ENSSSCG00000013553;ENSSSCG00000014007;ENSSSCG00000014117;ENSSSCG00000018050;ENSSSCG00000021944;ENSSSCG00000026211
ko04724	Glutamatergic synapse	0.0071	0.0112	0.63	0.857807	0.851526	ENSSSCG00000009956;ENSSSCG00000027952;ENSSSCG00000029635
ko04612	Antigen processing and presentation	0.0094	0.0142	0.66	0.858681	0.851526	ENSSSCG00000001455;ENSSSCG00000001469;ENSSSCG00000006648;ENSSSCG00000010948
ko03018	RNA degradation	0.0047	0.0083	0.57	0.872371	0.857207	ENSSSCG00000022616;ENSSSCG00000032424
ko05330	Allograft rejection	0.0071	0.0116	0.61	0.876972	0.857207	ENSSSCG00000001455;ENSSSCG00000001469;ENSSSCG00000037775
ko04658	Th1 and Th2 cell differentiation	0.0094	0.0148	0.64	0.879135	0.857207	ENSSSCG00000001455;ENSSSCG00000001469;ENSSSCG00000002383;ENSSSCG00000022849
ko00380	Tryptophan metabolism	0.0024	0.0049	0.48	0.88269	0.857207	ENSSSCG00000025686
ko04919	Thyroid hormone signaling pathway	0.0071	0.0118	0.6	0.883975	0.857207	ENSSSCG00000003909;ENSSSCG00000017874;ENSSSCG00000036990
ko05332	Graft-versus-host disease	0.0071	0.012	0.59	0.89062	0.857207	ENSSSCG00000001455;ENSSSCG00000001469;ENSSSCG00000008090
ko00970	Aminoacyl-tRNA biosynthesis	0.0024	0.0051	0.46	0.892351	0.857207	ENSSSCG00000002516
ko05165	Human papillomavirus infection	0.0259	0.0356	0.73	0.896014	0.857207	ENSSSCG00000003909;ENSSSCG00000006560;ENSSSCG00000012077;ENSSSCG00000014117;ENSSSCG00000015579;ENSSSCG00000015801;ENSSSCG00000016516;ENSSSCG00000017265;ENSSSCG00000030209;ENSSSCG00000035859;ENSSSCG00000040575
ko00513	Various types of N-glycan biosynthesis	0.0024	0.0052	0.45	0.89688	0.857207	ENSSSCG00000035222
ko00600	Sphingolipid metabolism	0.0024	0.0055	0.43	0.909356	0.857207	ENSSSCG00000034213
ko04940	Type I diabetes mellitus	0.0071	0.0127	0.56	0.911278	0.857207	ENSSSCG00000001455;ENSSSCG00000001469;ENSSSCG00000008090
ko03420	Nucleotide excision repair	0.0024	0.0056	0.42	0.913171	0.857207	ENSSSCG00000014242
ko04973	Carbohydrate digestion and absorption	0.0024	0.0057	0.41	0.916825	0.857207	ENSSSCG00000003909
ko05320	Autoimmune thyroid disease	0.0071	0.0132	0.53	0.923796	0.857207	ENSSSCG00000001455;ENSSSCG00000001469;ENSSSCG00000037775
ko04350	TGF-beta signaling pathway	0.0047	0.01	0.47	0.928848	0.857207	ENSSSCG00000000442;ENSSSCG00000003017
ko00510	N-Glycan biosynthesis	0.0024	0.0062	0.38	0.932921	0.857207	ENSSSCG00000025770
ko04120	Ubiquitin mediated proteolysis	0.0094	0.0171	0.55	0.935566	0.857207	ENSSSCG00000003949;ENSSSCG00000012637;ENSSSCG00000023379;ENSSSCG00000039703
ko04330	Notch signaling pathway	0.0024	0.0065	0.36	0.941044	0.857207	ENSSSCG00000030209
ko04961	Endocrine and other factor-regulated calcium reabsorption	0.0024	0.0066	0.36	0.943528	0.857207	ENSSSCG00000002315
ko04750	Inflammatory mediator regulation of TRP channels	0.0047	0.0107	0.44	0.944408	0.857207	ENSSSCG00000003909;ENSSSCG00000027952
ko04623	Cytosolic DNA-sensing pathway	0.0024	0.007	0.34	0.952461	0.857207	ENSSSCG00000011358
ko05218	Melanoma	0.0024	0.0072	0.33	0.956384	0.857207	ENSSSCG00000003909
ko05169	Epstein-Barr virus infection	0.0165	0.0284	0.58	0.960695	0.857207	ENSSSCG00000001455;ENSSSCG00000001469;ENSSSCG00000003909;ENSSSCG00000009002;ENSSSCG00000026742;ENSSSCG00000037775;ENSSSCG00000040575
ko05214	Glioma	0.0024	0.0075	0.31	0.961671	0.857207	ENSSSCG00000003909
ko05017	Spinocerebellar ataxia	0.0071	0.0156	0.45	0.964233	0.857207	ENSSSCG00000003909;ENSSSCG00000017874;ENSSSCG00000029635
ko05203	Viral carcinogenesis	0.0094	0.0194	0.49	0.967981	0.857207	ENSSSCG00000003909;ENSSSCG00000003949;ENSSSCG00000006560;ENSSSCG00000010214
ko04140	Autophagy - animal	0.0071	0.0161	0.44	0.969596	0.857207	ENSSSCG00000003909;ENSSSCG00000007665;ENSSSCG00000010948
ko04210	Apoptosis	0.0236	0.0388	0.61	0.970449	0.857207	ENSSSCG00000000136;ENSSSCG00000002383;ENSSSCG00000003909;ENSSSCG00000006648;ENSSSCG00000007522;ENSSSCG00000010948;ENSSSCG00000016216;ENSSSCG00000017643;ENSSSCG00000040486;ENSSSCG00000044553
ko00190	Oxidative phosphorylation	0.0071	0.0162	0.44	0.970573	0.857207	ENSSSCG00000013778;ENSSSCG00000016516;ENSSSCG00000038384
ko04144	Endocytosis	0.0189	0.0329	0.57	0.971783	0.857207	ENSSSCG00000000130;ENSSSCG00000000439;ENSSSCG00000005994;ENSSSCG00000009956;ENSSSCG00000017918;ENSSSCG00000022236;ENSSSCG00000022849;ENSSSCG00000033443
ko01521	EGFR tyrosine kinase inhibitor resistance	0.0024	0.0083	0.28	0.972849	0.857207	ENSSSCG00000003909
ko05014	Amyotrophic lateral sclerosis	0.0236	0.0394	0.6	0.97421	0.857207	ENSSSCG00000000439;ENSSSCG00000011610;ENSSSCG00000013545;ENSSSCG00000013778;ENSSSCG00000016216;ENSSSCG00000017427;ENSSSCG00000021997;ENSSSCG00000031538;ENSSSCG00000038384;ENSSSCG00000044553
ko05168	Herpes simplex virus 1 infection	0.033	0.0513	0.64	0.974546	0.857207	ENSSSCG00000001455;ENSSSCG00000001469;ENSSSCG00000003241;ENSSSCG00000003909;ENSSSCG00000006578;ENSSSCG00000009002;ENSSSCG00000011436;ENSSSCG00000013632;ENSSSCG00000015801;ENSSSCG00000025271;ENSSSCG00000026816;ENSSSCG00000027826;ENSSSCG00000031053;ENSSSCG00000035142
ko05016	Huntington disease	0.0189	0.0341	0.55	0.979017	0.858201	ENSSSCG00000000439;ENSSSCG00000006560;ENSSSCG00000011579;ENSSSCG00000013545;ENSSSCG00000013778;ENSSSCG00000016216;ENSSSCG00000017427;ENSSSCG00000038384
ko03008	Ribosome biogenesis in eukaryotes	0.0024	0.0095	0.25	0.983821	0.859479	ENSSSCG00000023921
ko03013	RNA transport	0.0047	0.0198	0.24	0.998308	0.864788	ENSSSCG00000011610;ENSSSCG00000023921
ko04141	Protein processing in endoplasmic reticulum	0.0024	0.0187	0.13	0.999714	0.864788	ENSSSCG00000044553
ko04740	Olfactory transduction	0.0071	0.1362	0.05	1	0.864788	ENSSSCG00000002315;ENSSSCG00000009956;ENSSSCG00000017918
