# Supplementary material for: Transcriptome and Metabolome Analyses Provide Insight into the Glucose-Induced Adipogenesis in Porcine Adipocytes
Source: Curr Issues Mol Biol. 2024 Mar 3;46(3):2027–42. doi: 10.3390/cimb46030131 (PMC10968871; doi:10.3390/cimb46030131)
Supplement: Supplementary file 1 [file cimb-46-00131-s001.zip › Table S6. Identification of the differential metabolites between LG and HG groups.xlsx]

## Sheet: Sheet1
Table S6. Identification of the differential metabolites between LG and HG groups
#ID	name	NG1	NG2	NG3	NG4	NG5	NG6	HG1	HG2	HG3	HG4	HG5	HG6	NG_Mean	HG_Mean	Fold_change	log2FC	Pvalue	VIP	regulated	KEGG_annotation	KEGG_pathway_annotation	LM_ID(lipidmaps)	CATEGORY(lipidmaps)	MAIN_CLASS(lipidmaps)	SUB_CLASS	HMDB_ID	CAS	kingdom(HMDB)	super_class(HMDB)	HMDB_taxonomy	sub_class(HMDB)	species
neg_1128	Cystine-glutamate	670.587	691.757	691.548	697.581	684.539	668.107	816.267	755.002	788.809	753.291	700.556	726.603	684.02	756.755	1.10633	0.145787	0.00663873	1.89759	up	--	--	--	--	--	--	HMDB0250714	--	Organic compounds	Organic acids and derivatives	Carboxylic acids and derivatives	--	Animals
neg_1801	3-Hydroxylidocaine	27.4356	25.1294	27.6758	25.3863	10.7073	23.2691	50.1599	54.1522	50.3765	60.6733	46.6292	37.3044	23.2672	49.8826	2.1439	1.10024	8.47e-05	2.10683	up	C16560	Drug metabolism - cytochrome P450(ko00982)	--	--	--	--	HMDB0060655	--	Organic compounds	Organic acids and derivatives	Carboxylic acids and derivatives	--	Animals
neg_1813	(10R,13S,17S)-17-Hydroxy-13-methyl-10-[(4-methylphenyl)methyl]-17-prop-1-ynyl-2,6,7,8,12,14,15,16-octahydro-1H-cyclopenta[a]phenanthren-3-one	52.7067	73.1459	65.5238	55.4477	49.1255	62.5768	89.8198	86.8252	75.5975	71.1406	70.9837	82.0129	59.7544	79.3966	1.32872	0.410032	0.00260385	1.84635	up	--	--	--	--	--	--	HMDB0250057	--	Organic compounds	Lipids and lipid-like molecules	Steroids and steroid derivatives	--	Animals
neg_1890	n-octyl-beta-D-thioglucopyranoside	6.95e-08	8.06e-08	1.29799	6.18803	7.26e-08	7.22e-08	77.4717	34.9321	53.9536	54.3044	60.4213	52.9785	1.24767	55.6769	44.6247	5.47977	0.000148758	2.21962	up	--	--	--	--	--	--	HMDB0255216	1000160-35-0	Organic compounds	Organic oxygen compounds	Organooxygen compounds	--	Animals
neg_2191	24,24-Difluoro-1alpha,25-dihydroxyvitamin D3	4727.61	6178.21	5455.43	5219.16	5414.35	5303.04	6276.36	6156.45	6225.59	5885.54	5827.1	5837.19	5382.97	6034.7	1.12107	0.164882	0.0174261	1.65978	up	--	--	--	--	--	--	HMDB0242645	--	Organic compounds	Lipids and lipid-like molecules	Steroids and steroid derivatives	--	Animals
neg_2226	GlcCer(d18:1/16:0)	382.866	399.464	462.491	477.68	448.348	452.834	656.976	608.678	613.796	604.745	578.246	595.396	437.28	609.639	1.39416	0.479398	7.18e-06	2.21802	up	C01190	--	LMSP0501AA03	Sphingolipids [SP]	Neutral glycosphingolipids [SP05]	Simple Glc series [SP0501]	HMDB0004971	--	Organic compounds	Lipids and lipid-like molecules	Sphingolipids	--	Animals
neg_2227	Tetracosahexaenic acid	15.285	22.2276	40.291	59.7364	61.1208	50.3347	71.601	57.9924	69.7427	99.5137	97.5933	85.1156	41.4993	80.2598	1.93401	0.951592	0.00403117	1.75188	up	--	--	--	--	--	--	HMDB0258879	--	Organic compounds	Lipids and lipid-like molecules	Fatty Acyls	--	Animals
neg_2857	Hydroxyminaline	248.953	330.02	294.4	290.993	297.915	286.915	233.657	219.513	229.939	206.236	218.887	192.965	291.533	216.866	0.743882	-0.426854	0.000285286	2.03797	down	--	--	--	--	--	--	HMDB0034368	--	Organic compounds	Organoheterocyclic compounds	Pyrroles	--	Animals
neg_2911	Pantothenic acid	96.8578	119.968	107.789	87.8477	97.5135	87.2521	124.049	117.603	126.309	109.458	115.109	111.555	99.538	117.347	1.17892	0.237464	0.0162026	1.62038	up	C00864	beta-Alanine metabolism(ko00410);;Pantothenate and CoA biosynthesis(ko00770);;Metabolic pathways(ko01100);;Biosynthesis of secondary metabolites(ko01110);;Biosynthesis of cofactors(ko01240);;Vitamin digestion and absorption(ko04977)	--	--	--	--	HMDB0000210	79-83-4	Organic compounds	Organic oxygen compounds	Organooxygen compounds	--	Microbe,Animals
neg_2956	Benzenesulfinic acid	18.385	18.4567	17.0116	18.741	18.5933	18.1402	7.5583	11.4736	9.75687	8.13956	6.17909	7.27109	18.2213	8.39642	0.460802	-1.11778	1.92e-05	2.23052	down	--	--	--	--	--	--	HMDB0248983	618-41-7	Organic compounds	Benzenoids	Benzene and substituted derivatives	--	Animals
neg_298	Sulfate	905.737	1171.86	1067.68	1030.11	1020.95	1039.23	1390.42	1426.03	1398.06	1355.07	1309.34	1320.89	1039.26	1366.63	1.31501	0.395071	4.47e-05	2.18572	up	--	--	--	--	--	--	--	--	--	--	--	--	--
neg_2981	1,2,5-Trihydroxypyrrole-3-sulfonic acid	25.1408	43.8302	40.082	27.1044	35.8319	32.583	14.6826	15.7156	19.4721	10.6543	14.0986	12.2136	34.0954	14.4728	0.42448	-1.23623	0.000587205	2.06615	down	--	--	--	--	--	--	HMDB0255342	--	Organic compounds	Organic acids and derivatives	Organic sulfonic acids and derivatives	--	Animals
neg_3039	4-Hydroxybenzenesulfonic acid	1968.53	2772.33	2322.49	2209.35	2225.46	2172.01	724.287	722.483	739.346	668.308	675.206	650.429	2278.36	696.676	0.30578	-1.70944	2.31e-05	2.26886	down	--	--	--	--	--	--	--	--	--	--	--	--	--
neg_3078	5-Methyl-2-thiophenecarboxaldehyde	183.973	230.004	258.577	250.282	240.913	236.013	70.2341	75.3246	75.0752	70.8072	68.9296	66.6593	233.294	71.1717	0.305073	-1.71277	1.83e-05	2.27676	down	--	--	--	--	--	--	HMDB0032431	13679-70-4	Organic compounds	Organoheterocyclic compounds	Thiophenes	--	Microbe,Animals
neg_3079	Etidronic acid	577.165	699.826	814.386	806.719	781.691	766.229	269.447	265.971	292.888	250.539	253.935	217.43	741.003	258.368	0.348674	-1.52005	2.01e-05	2.2517	down	C07736	--	--	--	--	--	HMDB0015210	7414-83-7	Organic compounds	Organic acids and derivatives	Organic phosphonic acids and derivatives	--	Animals
neg_3264	LysoPE(0:0/24:0)	594.029	666.486	648.106	612.445	621.633	598.678	568.164	591.823	563.217	469.456	515.85	460.227	623.563	528.123	0.846944	-0.239662	0.00607933	1.73635	down	--	--	LMGP02050061	Glycerophospholipids [GP]	Glycerophosphoethanolamines [GP02]	Monoacylglycerophosphoethanolamines [GP0205]	HMDB0011497	--	Organic compounds	Lipids and lipid-like molecules	Glycerophospholipids	--	Animals
neg_3304	Mebendazole metabolite (2-Amino-5-benzoylbenzimidazole)	60.7382	76.5365	71.7644	67.5424	65.7433	73.311	64.6562	82.7015	105.578	101.223	87.1121	92.0632	69.2726	88.889	1.28318	0.359719	0.0201151	1.56569	up	--	--	--	--	--	--	--	--	--	--	--	--	--
neg_3329	DG(17:0/20:4(7E,9E,11Z,13E)-3OH(5S,6R,15S)/0:0)	208.779	209.318	213.397	189.588	204.343	198.189	115.951	105.755	120.441	101.112	118.204	99.6652	203.936	110.188	0.540307	-0.888149	5.53e-09	2.28961	down	--	--	--	--	--	--	HMDB0295687	--	_	_	_	--	Animals
neg_3350	PC(20:4(5Z,8Z,11Z,14Z)/P-18:1(11Z))	111.794	132.879	126.876	120.851	122.38	112.587	22.8431	26.2507	18.6376	22.4585	22.9572	28.1638	121.228	23.5518	0.194277	-2.36381	5.03e-08	2.31551	down	--	--	--	--	--	--	--	--	--	--	--	--	--
neg_3557	2,3-Dihydro-6-methyl-1H-pyrrolizine-5-carboxaldehyde	50.0059	60.9801	71.491	55.8837	57.0459	68.9535	71.7637	72.1428	86.3294	83.0237	80.4159	61.4036	60.7267	75.8465	1.24898	0.320752	0.0132914	1.61116	up	--	--	--	--	--	--	HMDB0040047	55041-87-7	Organic compounds	Organoheterocyclic compounds	Pyrrolizines	--	Animals
neg_3558	Eutypine	2251.14	2788.19	3319.1	3040.31	2992.65	3145.02	3330.13	3489.53	4225.88	4396.24	3801.05	3091.82	2922.73	3722.44	1.27362	0.348931	0.0127985	1.62126	up	C08448	--	--	--	--	--	HMDB0301834	--	Organic compounds	Organic oxygen compounds	Organooxygen compounds	--	Microbe,Animals
neg_3560	(+/-)-3-[(2-methyl-3-furyl)thio]-2-butanone	27.6953	31.4643	30.4137	28.7668	27.1914	34.2882	41.6746	41.2514	49.6781	33.445	38.5764	27.3376	29.97	38.6605	1.28998	0.367345	0.0380146	1.55544	up	--	--	--	--	--	--	HMDB0032401	61295-44-1	Organic compounds	Organosulfur compounds	Thioethers	--	Animals
neg_3636	Cibulins	8.2164	10.5221	10.702	7.90316	8.11292	4.54123	17.1837	13.6351	15.8764	12.8924	16.4323	9.96027	8.33297	14.33	1.71968	0.782139	0.00202232	1.86947	up	--	--	--	--	--	--	HMDB0030299	--	Organic compounds	Organic acids and derivatives	Organosulfenic acids and derivatives	--	Animals
neg_3640	Xenognosin A	214.574	289.497	291.266	259.834	275.003	267.368	132.792	158.104	218.266	251.682	180.927	152.043	266.257	182.302	0.684686	-0.546486	0.00422696	1.82528	down	C08731	--	--	--	--	--	HMDB0029539	76907-79-4	Organic compounds	Phenylpropanoids and polyketides	Linear 1,3-diarylpropanoids	--	Animals,Plants
neg_3696	(2R)-2-Amino-4-(amino-butyl-oxo-lambda6-sulfanylidene)butanoic acid	46.0382	38.5763	47.57	35.0028	35.8709	32.934	85.7137	147.905	103.188	107.358	93.781	59.1114	39.332	99.5096	2.52999	1.33913	0.00345019	1.98216	up	--	--	--	--	--	--	HMDB0242762	--	Organic compounds	Organic acids and derivatives	Carboxylic acids and derivatives	--	Animals
neg_3704	Prolyl-Glutamine	157.129	201.983	156.337	162.317	155.485	152.592	81.3131	79.9871	78.6428	76.9349	76.9767	83.9398	164.307	79.6324	0.484656	-1.04497	8.54e-05	2.23409	down	--	--	--	--	--	--	HMDB0029015	--	Organic compounds	Organic acids and derivatives	Carboxylic acids and derivatives	--	Animals
neg_3753	1-[3-(1,3-Benzodioxol-5-yloxy)propyl]-4-phenylpiperazine	5.33036	8.06e-08	7.78563	3.09612	8.77512	2.01482	50.2467	38.5609	34.9302	33.1556	34.7182	17.7866	4.50034	34.8997	7.7549	2.95511	0.000483954	2.15141	up	--	--	--	--	--	--	HMDB0249355	82900-57-0	Organic compounds	Organoheterocyclic compounds	Diazinanes	--	Animals
neg_3754	Momelotinib	2132.23	1933.2	2448.91	2473.02	2515.2	2525.63	4788.59	4464.59	4027.07	4231.01	3978.48	2650.55	2338.03	4023.38	1.72084	0.783114	0.00170341	2.05789	up	--	--	--	--	--	--	HMDB0250717	--	Organic compounds	Organoheterocyclic compounds	Diazines	--	Animals
neg_3759	Diphacinone	609.411	760.564	656.919	608.165	629.626	638.959	31.821	36.6326	25.5796	30.3289	29.2571	32.7033	650.607	31.0537	0.0477304	-4.38895	1.29e-06	2.30895	down	C18698	--	--	--	--	--	HMDB0251443	82-66-6	Organic compounds	Benzenoids	Benzene and substituted derivatives	--	Animals
neg_3824	Dihydroneopterin phosphate	30.7256	39.1711	35.5093	24.8886	32.126	28.6066	8.02e-08	7.89e-08	7.92e-08	7.21e-08	7.12e-08	6.76e-08	31.8379	7.49e-08	2.35e-09	-28.664	2.06e-05	2.28512	down	C05925	Folate biosynthesis(ko00790);;Metabolic pathways(ko01100);;Biosynthesis of cofactors(ko01240)	--	--	--	--	HMDB0006824	19622-42-5	Organic compounds	Organoheterocyclic compounds	Pteridines and derivatives	--	Microbe,Animals
neg_3837	Cytidine	68.6904	74.5355	65.1379	54.8712	64.2557	59.7687	8.02e-08	7.89e-08	7.92e-08	7.21e-08	7.12e-08	6.76e-08	64.5432	7.49e-08	1.16e-09	-29.6835	2.82e-06	2.30619	down	C00475	Pyrimidine metabolism(ko00240);;Metabolic pathways(ko01100);;Nucleotide metabolism(ko01232);;ABC transporters(ko02010)	--	--	--	--	HMDB0000089	65-46-3	Organic compounds	Nucleosides, nucleotides, and analogues	Pyrimidine nucleosides	--	Microbe,Animals
neg_3846	epsilon-Viniferin	338.751	429.145	387.163	345.307	356.399	369.232	42.3297	33.4641	46.3797	40.0303	31.6867	45.8245	371	39.9525	0.107689	-3.21506	1.22e-06	2.30665	down	--	--	--	--	--	--	HMDB0259817	--	Organic compounds	Phenylpropanoids and polyketides	2-arylbenzofuran flavonoids	--	Animals
neg_3848	Diprenorphine	59.1617	43.0518	74.5736	74.8451	85.6171	69.8963	107.508	99.467	106.495	111.135	98.4292	63.97	67.8576	97.834	1.44175	0.527826	0.00943389	1.70625	up	--	--	--	--	--	--	HMDB0251470	--	Organic compounds	Benzenoids	Phenanthrenes and derivatives	--	Animals
neg_3860	Olodaterol	494.996	498.656	384.279	346.233	431.86	388.241	895.369	650.426	616.792	481.036	504.095	444.224	424.044	598.657	1.41178	0.497515	0.049933	1.50103	up	--	--	--	--	--	--	HMDB0255957	--	Organic compounds	Organoheterocyclic compounds	Benzoxazines	--	Animals
neg_3898	17-Aminogeldanamycin	19.4424	22.3427	34.9067	19.4807	27.352	34.4622	5.69106	3.43053	6.73654	1.86423	3.16262	6.76e-08	26.3311	3.48083	0.132195	-2.91926	0.000257726	2.13148	down	--	--	--	--	--	--	HMDB0259661	--	Organic compounds	Phenylpropanoids and polyketides	Macrolactams	--	Animals
neg_3900	LysoPE(0:0/20:5(5Z,8Z,11Z,14Z,17Z))	1391.76	1227.64	2054.29	2022.35	2011.39	2009.15	761.32	706.168	744.808	724.491	666.897	491.708	1786.1	682.565	0.382155	-1.38777	0.000526752	2.10828	down	--	--	LMGP02050053	Glycerophospholipids [GP]	Glycerophosphoethanolamines [GP02]	Monoacylglycerophosphoethanolamines [GP0205]	HMDB0011489	--	Organic compounds	Lipids and lipid-like molecules	Glycerophospholipids	--	Animals
neg_3911	Retaspimycin	81.3347	68.6735	129.133	105.267	107.015	100.263	21.4704	28.4541	25.4459	25.4347	24.3459	17.0333	98.6142	23.6974	0.240304	-2.05707	0.000261976	2.18885	down	--	--	--	--	--	--	HMDB0257169	--	Organic compounds	Phenylpropanoids and polyketides	Macrolactams	--	Animals
neg_3920	LysoPE(18:3(9Z,12Z,15Z)/0:0)	62.0847	58.6676	68.1575	71.9418	61.6358	59.7715	95.0673	91.5381	94.1965	88.3729	80.9737	66.0061	63.7098	86.0258	1.35027	0.433253	0.00277179	1.94981	up	--	--	LMGP02050029	Glycerophospholipids [GP]	Glycerophosphoethanolamines [GP02]	Monoacylglycerophosphoethanolamines [GP0205]	HMDB0011509	--	Organic compounds	Lipids and lipid-like molecules	Glycerophospholipids	--	Animals
neg_3922	LysoPC(16:1(9Z)/0:0)	199.515	171.758	257.642	228.782	216.884	222.783	363.086	353.733	367.111	327.787	332.213	225.078	216.227	328.168	1.5177	0.601885	0.0020611	1.95249	up	C04230	--	LMGP01050022	Glycerophospholipids [GP]	Glycerophosphocholines [GP01]	Monoacylglycerophosphocholines [GP0105]	HMDB0010383	76790-27-7	Organic compounds	Lipids and lipid-like molecules	Glycerophospholipids	--	Microbe,Animals
neg_3931	DG(2:0/20:4(8Z,11Z,14Z,17Z)-2OH(5S,6R)/0:0)	57.7788	59.2728	79.582	90.8901	114.41	85.4518	98.5508	113.631	123.8	155.916	133.541	114.468	81.2309	123.318	1.51811	0.602279	0.00524637	1.7187	up	--	--	--	--	--	--	HMDB0297003	--	_	_	_	--	Animals
neg_3965	valeryl 4-hydroxy valsartan	72.6902	67.3779	70.6669	51.8424	45.8362	50.7203	157.84	142.258	134.063	159.661	111.798	143.497	59.8557	141.519	2.36434	1.24144	6.99e-06	2.21013	up	--	--	--	--	--	--	HMDB0259747	--	Organic compounds	Organic acids and derivatives	Carboxylic acids and derivatives	--	Animals
neg_3972	Kinetensin 4-7	32.7325	64.5581	55.9117	60.9606	53.317	61.6669	70.1537	60.8757	77.1854	69.1993	68.6966	67.385	54.8578	68.9159	1.25627	0.329141	0.0303923	1.52529	up	--	--	--	--	--	--	HMDB0012986	138482-56-1	Organic compounds	Organic acids and derivatives	Carboxylic acids and derivatives	--	Animals
neg_3983	8,11-eicosadiynoic acid	599.798	544.233	819.83	806.536	826.098	812.259	1047.66	1021.71	1083.29	1049.21	977.475	705.014	734.792	980.726	1.3347	0.416514	0.00980091	1.70085	up	--	--	--	--	--	--	--	--	--	--	--	--	--
neg_3984	Glycerophospho-N-Arachidonoyl Ethanolamine	31741.9	29072.6	46730.1	47742.2	46520.8	47699.6	58716.3	57687.1	61011.8	57899.8	55192	40906.9	41584.6	55235.6	1.32827	0.409551	0.0150802	1.63364	up	--	--	--	--	--	--	HMDB0252848	--	Organic compounds	Lipids and lipid-like molecules	Glycerophospholipids	--	Animals
neg_3986	4-Chloro-2-nitrobenzylalcohol	1036.67	991.263	1377.83	1252.83	1248.65	1229.91	1736.04	1706.21	1831.34	1525.87	1532.64	1133.4	1189.53	1577.58	1.32623	0.407331	0.0106906	1.73205	up	--	--	--	--	--	--	HMDB0249542	--	Organic compounds	Organoheterocyclic compounds	Benzoxazoles	--	Animals
neg_3987	Platydesminium	148.394	152.402	224.113	196.839	194.874	199.205	247.468	264.643	279.537	255.683	246.564	192.47	185.971	247.727	1.33207	0.413674	0.00477293	1.77522	up	--	--	--	--	--	--	HMDB0030342	--	Organic compounds	Organoheterocyclic compounds	Quinolines and derivatives	--	Animals
neg_3998	Taurolithocholic acid 3-sulfate	103.09	100.29	147.525	151.998	140.303	153.353	200.024	218.065	190.988	193.88	178.734	135.79	132.76	186.247	1.40288	0.488396	0.00558748	1.78888	up	C03642	Bile secretion(ko04976)	LMST05020003	Sterol Lipids [ST]	Steroid conjugates [ST05]	Sulfates [ST0502]	HMDB0002580	15324-65-9	Organic compounds	Lipids and lipid-like molecules	Steroids and steroid derivatives	--	Animals
neg_4001	Devd-amc	71.0863	62.4612	93.3165	94.3247	88.5756	78.8811	119.36	128.36	132.1	104.616	119.037	73.9884	81.4409	112.91	1.38641	0.471351	0.0142754	1.67216	up	--	--	--	--	--	--	HMDB0251075	--	Organic compounds	Organic acids and derivatives	Peptidomimetics	--	Animals
neg_4016	LysoPC(20:4(8Z,11Z,14Z,17Z)/0:0)	2511.94	2491.17	3590.66	3479.07	3341.16	3488.08	4563.15	4351.91	4631.8	4397.99	4053.58	3012.25	3150.35	4168.45	1.32317	0.403998	0.01038	1.70002	up	C04230	--	LMGP01050140	Glycerophospholipids [GP]	Glycerophosphocholines [GP01]	Monoacylglycerophosphocholines [GP0105]	HMDB0010396	--	Organic compounds	Lipids and lipid-like molecules	Glycerophospholipids	--	Animals
neg_4018	(4E)-3-Hydroxyhex-4-enoylcarnitine	35.2136	39.4971	53.3122	48.9341	50.091	47.5754	81.0992	72.1146	83.9979	69.4447	68.2717	60.1513	45.7706	72.5132	1.58428	0.663823	0.000197538	2.07785	up	--	--	--	--	--	--	HMDB0241670	--	Organic compounds	Lipids and lipid-like molecules	Fatty Acyls	--	Animals
neg_4019	PC(2:0/PGF2alpha)	29.4627	24.2993	60.4806	41.7407	45.4352	43.3764	71.0164	61.8464	80.4945	57.79	60.2648	34.2746	40.7992	60.9478	1.49385	0.579034	0.0348811	1.46419	up	--	--	--	--	--	--	HMDB0288832	--	_	_	_	--	Animals
neg_4026	Buprenorphine	42.6531	25.1003	60.5693	50.3341	52.6565	47.8722	90.8731	76.453	88.35	84.3919	71.4631	48.1192	46.5309	76.6084	1.6464	0.719312	0.00448476	1.81437	up	C08007	--	--	--	--	--	HMDB0015057	52485-79-7	Organic compounds	Benzenoids	Phenanthrenes and derivatives	--	Animals
neg_4032	(2S,4R)-p-Mentha-1(7),5-dien-2-ol	42.0819	65.2347	56.9338	46.8837	42.0543	44.8388	75.2719	60.9374	77.6116	72.6214	56.1852	61.8831	49.6712	67.4184	1.35729	0.440733	0.00718609	1.70941	up	--	--	--	--	--	--	HMDB0035277	29332-98-7	Organic compounds	Lipids and lipid-like molecules	Prenol lipids	--	Animals
neg_4036	geldanamycin	14.9612	30.1861	9.67483	16.8305	26.0831	23.0514	23.1201	20.0692	36.7339	44.2629	33.2901	39.4127	20.1312	32.8148	1.63005	0.704915	0.0294687	1.43141	up	--	--	--	--	--	--	HMDB0252665	--	Organic compounds	Phenylpropanoids and polyketides	Macrolactams	--	Animals
neg_4045	RIOPROSTIL	53.029	55.8386	36.6347	32.2843	36.7541	39.0793	8.02e-08	7.89e-08	7.92e-08	7.21e-08	7.12e-08	6.76e-08	42.27	7.49e-08	1.77e-09	-29.0729	0.000125874	2.22714	down	--	--	--	--	--	--	HMDB0257238	--	Organic compounds	Lipids and lipid-like molecules	Fatty Acyls	--	Animals
neg_4048	7Z, 10Z, 13Z, 16Z, 19Z-docosapentaenoic acid	291.559	261.671	447.556	421.786	400.379	432.412	254.444	239.683	257.732	246.601	230.803	170.23	375.894	233.249	0.620518	-0.688456	0.00517213	1.81908	down	--	--	--	--	--	--	--	--	--	--	--	--	--
neg_4050	LysoPE(0:0/22:5(4Z,7Z,10Z,13Z,16Z))	14704.5	14559.8	21659	21220.3	20628.8	21587.6	13261.1	12657	13355.9	12875.1	12168.4	9053.03	19060	12228.4	0.641576	-0.640309	0.00308471	1.86114	down	--	--	LMGP02050058	Glycerophospholipids [GP]	Glycerophosphoethanolamines [GP02]	Monoacylglycerophosphoethanolamines [GP0205]	HMDB0011494	--	Organic compounds	Lipids and lipid-like molecules	Glycerophospholipids	--	Animals
neg_4055	Canescein	67.4372	63.601	91.1728	74.0835	98.2595	76.9739	67.9125	43.7448	46.4506	54.5451	56.2359	33.2348	78.588	50.354	0.640734	-0.642204	0.0034107	1.76651	down	--	--	--	--	--	--	HMDB0029313	22333-73-9	Organic compounds	Organoheterocyclic compounds	Isobenzofurans	--	Animals
neg_4066	Tauroursodeoxycholic acid	100.107	96.4409	143.348	107.38	104.99	109.833	177.46	161.758	174.959	128.992	143.893	96.8352	110.35	147.316	1.33499	0.416833	0.0339835	1.5222	up	C16868	--	LMST05040015	Sterol Lipids [ST]	Steroid conjugates [ST05]	Taurine conjugates [ST0504]	HMDB00874	--	--	--	--	--	Plants
neg_4070	herbimycin a	137.813	139.988	161.126	145.277	135.537	163.633	124.913	119.004	105.691	123.435	125.437	117.058	147.229	119.256	0.810005	-0.303998	0.0012424	1.93627	down	--	--	--	--	--	--	HMDB0253109	--	Organic compounds	Phenylpropanoids and polyketides	Macrolactams	--	Animals
neg_4142	1-Dodecanesulfonic acid, 1-hydroxy-3-oxo-	16.1485	18.4458	28.8438	28.0731	39.1374	35.7835	45.5399	58.2498	64.7818	68.5927	75.8704	49.375	27.7387	60.4016	2.17752	1.12269	0.000352804	1.99899	up	--	--	--	--	--	--	HMDB0243866	--	Organic compounds	Organic oxygen compounds	Organooxygen compounds	--	Animals
neg_4149	trans-16-Octadecenoic acid	70.8248	69.9435	108.924	106.43	105.23	101.65	140.633	153.17	152.418	152.257	149.867	96.6731	93.8337	140.836	1.50091	0.585842	0.00266375	1.85798	up	--	--	LMFA01030081	Fatty Acyls [FA]	Fatty Acids and Conjugates [FA01]	Unsaturated fatty acids [FA0103]	HMDB0304769	--	Organic compounds	Lipids and lipid-like molecules	Fatty Acyls	--	Animals
neg_4159	Dhesn	101.33	99.3656	127.924	111.756	85.0793	96.644	177.624	172.978	169.791	139.213	128.579	107.295	103.683	149.246	1.43945	0.525516	0.00931892	1.7742	up	--	--	--	--	--	--	HMDB0251109	--	Organic compounds	Alkaloids and derivatives	Ergoline and derivatives	--	Animals
neg_4163	Verdamicin	10.5173	8.06e-08	22.8867	23.8722	22.7814	32.0409	69.1517	66.5315	66.6085	75.917	60.5634	24.5539	18.6831	60.5543	3.24113	1.6965	0.00127279	1.98521	up	--	--	--	--	--	--	HMDB0259789	--	Organic compounds	Organic oxygen compounds	Organooxygen compounds	--	Animals
neg_4172	Milbemycin A3	30.0075	42.4552	25.3324	27.4726	19.6557	20.5279	48.0167	41.8921	40.0274	50.6589	60.6619	41.8269	27.5752	47.1807	1.71098	0.774824	0.00178465	1.85064	up	--	--	--	--	--	--	HMDB0254720	--	Organic compounds	Phenylpropanoids and polyketides	Macrolides and analogues	--	Animals
neg_4186	LysoPE(0:0/20:1(11Z))	144.236	132.265	164.1	153.516	155.69	149.806	209.33	203.508	202.212	205.15	209.367	149.27	149.935	196.473	1.31038	0.389988	0.00295883	1.93259	up	--	--	LMGP02050046	Glycerophospholipids [GP]	Glycerophosphoethanolamines [GP02]	Monoacylglycerophosphoethanolamines [GP0205]	HMDB0011482	--	Organic compounds	Lipids and lipid-like molecules	Glycerophospholipids	--	Animals
neg_4199	CL(8:0/10:0/10:0/15:0)	118.13	76.8091	257.035	244.478	227.885	235.742	454.689	439.178	486.429	479.877	440.91	212.653	193.346	418.956	2.16687	1.11561	0.00184007	1.91499	up	--	--	--	--	--	--	HMDB0117436	--	Organic compounds	Lipids and lipid-like molecules	Glycerophospholipids	--	Animals
neg_4202	Pubesenolide	86.9497	141.039	100.558	91.4189	81.4386	99.0538	134.522	139.084	139.782	138.187	120.358	134.635	100.076	134.428	1.34325	0.425731	0.00927203	1.7816	up	--	--	--	--	--	--	HMDB0033728	98569-64-3	Organic compounds	Lipids and lipid-like molecules	Prenol lipids	--	Animals
neg_4204	LysoPE(0:0/22:4(7Z,10Z,13Z,16Z))	15582	15787.8	22979.4	23532	23065.2	23754.5	28648.4	27739	29424.8	28992.2	27697.3	21138.3	20783.5	27273.3	1.31226	0.392052	0.0107687	1.68894	up	--	--	LMGP02050057	Glycerophospholipids [GP]	Glycerophosphoethanolamines [GP02]	Monoacylglycerophosphoethanolamines [GP0205]	HMDB0011493	--	Organic compounds	Lipids and lipid-like molecules	Glycerophospholipids	--	Animals
neg_4208	Cilengitide	41.1748	29.605	64.2381	96.6636	99.0658	99.2774	107.192	88.8294	120.789	148.68	141.463	102.762	71.6708	118.286	1.6504	0.722819	0.0163112	1.58491	up	--	--	--	--	--	--	HMDB0250242	--	Organic compounds	Organic acids and derivatives	Carboxylic acids and derivatives	--	Animals
neg_4215	PS(18:1(9Z)/0:0)	125.828	105.77	125.967	87.8291	96.4241	88.2134	162.633	157.267	133.068	134.292	132.616	94.0186	105.005	135.649	1.29183	0.369418	0.0330771	1.49476	up	--	--	LMGP03050001	Glycerophospholipids [GP]	Glycerophosphoserines [GP03]	Monoacylglycerophosphoserines [GP0305]	HMDB0240603	89319-60-8	Organic compounds	Lipids and lipid-like molecules	Glycerophospholipids	--	Microbe,Animals
neg_4218	Canesceol	61.7754	47.3687	68.9401	58.0543	65.2017	69.5851	112.503	98.7252	109.474	97.811	98.8503	62.2945	61.8209	96.6097	1.56274	0.644073	0.00344733	1.93201	up	--	--	--	--	--	--	HMDB0034084	82228-15-7	Organic compounds	Lipids and lipid-like molecules	Steroids and steroid derivatives	--	Animals
neg_4222	Lefamulin	32.3171	48.9487	22.7354	22.2913	14.6694	28.5227	9.36615	7.59713	16.9686	9.36432	8.55147	19.8307	28.2474	11.9464	0.42292	-1.24154	0.0177637	1.6425	down	--	--	--	--	--	--	HMDB0254002	--	Organic compounds	Lipids and lipid-like molecules	Prenol lipids	--	Animals
neg_4245	Sebacil	17.2619	28.2184	20.4819	10.9963	16.4353	12.1308	27.6336	29.8491	27.2047	22.6287	28.5902	25.0508	17.5874	26.8262	1.5253	0.609096	0.0133625	1.67837	up	--	--	--	--	--	--	HMDB0256498	--	Organic compounds	Benzenoids	Benzene and substituted derivatives	--	Animals
neg_4252	LysoPE(0:0/20:2(11Z,14Z))	1033.71	1096.65	1376.14	1287.66	1279.99	1340.71	1563.83	1558.12	1586.4	1555.17	1498.58	1184.15	1235.81	1491.04	1.20653	0.270863	0.0128086	1.65856	up	--	--	LMGP02050047	Glycerophospholipids [GP]	Glycerophosphoethanolamines [GP02]	Monoacylglycerophosphoethanolamines [GP0205]	HMDB0011483	--	Organic compounds	Lipids and lipid-like molecules	Glycerophospholipids	--	Animals
neg_4263	LysoPE(22:2(13Z,16Z)/0:0)	208.058	198.852	265.788	246.564	236.88	250.56	145.624	138.639	137.372	136.336	140.049	81.613	234.45	129.939	0.554229	-0.851446	2.82e-05	2.10912	down	--	--	LMGP02050024	Glycerophospholipids [GP]	Glycerophosphoethanolamines [GP02]	Monoacylglycerophosphoethanolamines [GP0205]	HMDB0011522	--	Organic compounds	Lipids and lipid-like molecules	Glycerophospholipids	--	Animals
neg_4266	Elocalcitol	353.738	373.823	325.497	252.771	245.531	266.526	426.579	402.544	403.326	327.386	363.589	339.755	302.981	377.196	1.24495	0.316088	0.0252443	1.52862	up	--	--	--	--	--	--	HMDB0251753	--	Organic compounds	Lipids and lipid-like molecules	Steroids and steroid derivatives	--	Animals
neg_4267	Bardoxolone	73.6715	83.4468	74.8182	53.5871	64.058	61.1063	109.941	88.6812	103.919	92.299	93.425	93.8962	68.448	97.0268	1.41753	0.503376	0.000533368	1.99019	up	--	--	--	--	--	--	--	--	--	--	--	--	--
neg_4286	(1R,7S,13S,15S)-2,15-Dihydroxy-7-methyl-6-oxabicyclo[11.3.0]hexadeca-3,11-dien-5-one	46.8702	52.6651	50.0593	38.1008	46.2792	44.6854	56.3738	52.2239	53.6413	51.6395	52.8074	50.4596	46.4433	52.8576	1.13811	0.186639	0.024012	1.58331	up	--	--	--	--	--	--	HMDB0242339	--	Organic compounds	Phenylpropanoids and polyketides	Macrolides and analogues	--	Animals
neg_4288	Fluocortolone Pivalate	72.5275	68.5958	98.3993	57.3787	54.3222	60.249	149.247	147.279	150.911	84.6502	78.5845	76.5567	68.5787	114.538	1.67017	0.739995	0.0306151	1.57133	up	--	--	--	--	--	--	HMDB0252353	1000152-97-2	Organic compounds	Lipids and lipid-like molecules	Steroids and steroid derivatives	--	Animals
neg_4290	Cabergoline	60.8261	42.2428	47.0382	43.7971	50.3928	59.0644	86.0519	70.1578	76.849	75.5007	91.8159	88.8048	50.5602	81.53	1.61253	0.689328	6.78e-05	2.08678	up	C08187	--	--	--	--	--	HMDB0014393	81409-90-7	Organic compounds	Alkaloids and derivatives	Ergoline and derivatives	--	Animals
neg_433	Hypothiocyanite	15.1605	17.8853	16.0212	13.2791	17.0417	18.9551	24.7634	26.9809	24.6442	19.7644	21.4639	18.413	16.3905	22.6716	1.38322	0.46803	0.00389022	1.88313	up	--	--	--	--	--	--	HMDB0012974	63296-34-4	Organic compounds	Organosulfur compounds	Thiocyanates	--	Animals
neg_4355	13-HODE	64.9331	93.4042	77.7129	63.8913	69.3607	67.7371	121.378	118.741	113.363	98.7488	111.115	112.45	72.8399	112.633	1.5463	0.628824	5.64e-05	2.13229	up	C14762	Linoleic acid metabolism(ko00591);;PPAR signaling pathway(ko03320)	LMFA02000228	Fatty Acyls [FA]	Octadecanoids [FA02]	Other Octadecanoids [FA0200]	HMDB0004667	29623-28-7	Organic compounds	Lipids and lipid-like molecules	Fatty Acyls	--	Animals
neg_4371	Chenodeoxycholylaspartic acid	1476.29	1407.79	2169.66	2097.45	2052.04	2228.66	2618	2570.18	2682.25	2515.55	2490.91	1817.46	1905.31	2449.06	1.28538	0.362197	0.0205832	1.57963	up	--	--	--	--	--	--	HMDB0242402	--	Organic compounds	Lipids and lipid-like molecules	Steroids and steroid derivatives	--	Animals
neg_4372	Gly-Pro-Arg-Pro-Lys	22.2731	10.8208	37.2739	29.2626	38.0515	29.6324	47.9596	41.0676	52.6788	34.1176	46.5608	26.3185	27.8857	41.4505	1.48644	0.571863	0.0404405	1.42133	up	--	--	--	--	--	--	HMDB0252830	--	Organic compounds	Organic acids and derivatives	Carboxylic acids and derivatives	--	Animals
neg_4374	Endomorphin-2	250.81	225.513	382.952	387.649	384.826	404.058	511.246	496.058	539.686	483.619	480.431	325.83	339.301	472.812	1.39349	0.478698	0.0134603	1.65241	up	--	--	--	--	--	--	HMDB0005774	141801-26-5	Organic compounds	Phenylpropanoids and polyketides	Isoflavonoids	--	Animals
neg_4377	LysoPE(22:1(13Z)/0:0)	249	210.402	367.955	338.789	332.75	329.015	459.3	445.358	452.302	438.747	432.541	298.149	304.652	421.066	1.38212	0.466886	0.0078838	1.72298	up	--	--	LMGP02050068	Glycerophospholipids [GP]	Glycerophosphoethanolamines [GP02]	Monoacylglycerophosphoethanolamines [GP0205]	HMDB0011521	--	Organic compounds	Lipids and lipid-like molecules	Glycerophospholipids	--	Animals
neg_4381	4-(4-Methylphenyl)-2-butanone	33.506	41.0797	40.153	35.0721	34.028	36.6837	45.1798	64.2796	51.2111	61.713	46.5907	50.8472	36.7537	53.3036	1.45029	0.536341	0.00244542	1.92886	up	--	--	--	--	--	--	HMDB0036183	7774-79-0	Organic compounds	Benzenoids	Benzene and substituted derivatives	--	Animals
neg_4394	LysoPE(0:0/20:0)	1136.62	1416.39	1283.32	1085.36	1075.87	1080.35	1070.17	1019.64	1006.11	907.017	919.031	908.821	1179.65	971.798	0.8238	-0.279633	0.0131133	1.65587	down	--	--	LMGP02050045	Glycerophospholipids [GP]	Glycerophosphoethanolamines [GP02]	Monoacylglycerophosphoethanolamines [GP0205]	HMDB0011481	--	Organic compounds	Lipids and lipid-like molecules	Glycerophospholipids	--	Animals
neg_4396	1-Stearoyl-sn-glycerol 3-phosphocholine	5457.65	6679.4	5878.16	5102.78	5143.07	5159.66	4943	4945.24	4824.09	4319.34	4137.41	4210.99	5570.12	4563.34	0.819255	-0.287616	0.0088402	1.68067	down	--	--	--	--	--	--	--	--	--	--	--	--	--
neg_4403	Amphibine H	1150.25	1453.03	1241.05	1083.62	1112.94	1090.84	1085.72	1038.89	983.975	896.485	851.573	832.686	1188.62	948.222	0.797749	-0.325994	0.00827534	1.65575	down	--	--	--	--	--	--	HMDB0029333	52659-55-9	Organic compounds	Organic acids and derivatives	Carboxylic acids and derivatives	--	Animals
neg_4419	Arginyl-prolyl-proline	209.209	253.819	246.838	218.858	224.083	216.374	8.02e-08	7.89e-08	7.92e-08	7.21e-08	7.12e-08	6.76e-08	228.197	7.49e-08	3.28e-10	-31.5054	6.39e-07	2.31713	down	--	--	--	--	--	--	HMDB0249363	--	Organic compounds	Organic acids and derivatives	Carboxylic acids and derivatives	--	Animals
neg_4445	LysoPE(0:0/22:2(13Z,16Z))	906.434	863.673	1303.41	1284.86	1269.54	1273.6	1538.8	1519.46	1587.93	1478.97	1485.91	1075.23	1150.25	1447.72	1.25861	0.331829	0.0258161	1.53214	up	--	--	LMGP02050056	Glycerophospholipids [GP]	Glycerophosphoethanolamines [GP02]	Monoacylglycerophosphoethanolamines [GP0205]	HMDB0011492	--	Organic compounds	Lipids and lipid-like molecules	Glycerophospholipids	--	Animals
neg_4479	Epoxyeicosatrienoic acid	101.56	119.586	89.3219	88.8324	84.7797	88.3409	171.673	151.933	174.185	143.295	144.478	158.53	95.4035	157.349	1.6493	0.721855	1.04e-05	2.17995	up	--	--	--	--	--	--	HMDB0251881	--	Organic compounds	Lipids and lipid-like molecules	Fatty Acyls	--	Animals
neg_4505	PE(16:1(9Z)/18:1(11Z))	46643.1	58036.2	69168.6	80633.4	79584.3	79194.8	81561.1	89508.4	94068.6	82980	86397.4	83248.3	68876.7	86293.9	1.25288	0.325243	0.0266857	1.58713	up	--	--	--	--	--	--	HMDB0008959	--	Organic compounds	Lipids and lipid-like molecules	Glycerophospholipids	--	Animals
neg_4576	LysoPE(0:0/22:1(13Z))	548.067	472.801	759.129	816.891	744.129	784.008	935.115	955.113	1023.17	959.375	885.575	674.684	687.504	905.506	1.31709	0.397356	0.0171763	1.608	up	--	--	LMGP02050055	Glycerophospholipids [GP]	Glycerophosphoethanolamines [GP02]	Monoacylglycerophosphoethanolamines [GP0205]	HMDB0011491	--	Organic compounds	Lipids and lipid-like molecules	Glycerophospholipids	--	Animals
neg_4586	(3b,16b,20R)-Pregn-5-ene-3,16,20-triol 3-glucoside	6.95e-08	2.17601	3.12299	10.1321	8.9137	10.0037	17.4519	9.75836	11.5041	26.3435	18.2341	27.9363	5.72475	18.5381	3.23823	1.69521	0.00657292	1.72073	up	--	--	--	--	--	--	--	--	--	--	--	--	--
neg_785	Histidylglutamic acid	350.716	381.867	371.296	360.802	353.448	348.884	433.61	416.147	441.209	405.83	381.253	373.355	361.169	408.567	1.13124	0.1779	0.00618402	1.84301	up	--	--	--	--	--	--	HMDB0028884	53634-28-9	Organic compounds	Organic acids and derivatives	Carboxylic acids and derivatives	--	Animals
neg_789	2-(Trifluoromethyl)isonicotinic acid	157.498	169.645	183.127	172.385	184.703	162.732	204.731	209.065	220.305	189.705	194.273	184.698	171.682	200.463	1.16764	0.223599	0.00232066	1.86254	up	--	--	--	--	--	--	HMDB0244959	--	Organic compounds	Organoheterocyclic compounds	Pyridines and derivatives	--	Animals
pos_1133	PI(22:3(10Z,13Z,16Z)/TXB2)	40.9966	64.6092	49.1887	49.1298	24.5967	25.938	21.2122	16.4557	6.1103	15.3767	10.9544	11.062	42.4098	13.5286	0.318996	-1.64839	0.0044502	1.8869	down	--	--	--	--	--	--	HMDB0277833	--	_	_	_	--	Animals
pos_1143	3'-Sialyllactosamine	381.858	519.372	422.96	405.024	373.76	386.457	265.89	250.377	250.126	214.509	209.537	207.535	414.905	232.996	0.561564	-0.832477	0.000134176	2.12539	down	--	--	--	--	--	--	HMDB0006607	126151-66-4	Organic compounds	Organic oxygen compounds	Organooxygen compounds	--	Animals
pos_1144	Crocin 3	15832	19778.9	17175.5	16163.3	15272.5	15734.4	11832	11371.4	10828.2	9999.92	9494.71	9414.39	16659.4	10490.1	0.629681	-0.667308	4.41e-05	2.13665	down	--	--	--	--	--	--	HMDB0039121	55750-85-1	Organic compounds	Lipids and lipid-like molecules	Prenol lipids	--	Animals
pos_1147	Citrusin II	1501.61	2241.55	1830.69	1844.02	1764.25	1822.94	1205.72	1155.63	1106.72	1057.23	1062.33	1085.01	1834.18	1112.11	0.606326	-0.721835	0.000481858	2.11811	down	--	--	--	--	--	--	HMDB0303681	--	Organic compounds	Organic acids and derivatives	Carboxylic acids and derivatives	--	Animals
pos_1148	Valganciclovir	112.248	146.468	97.5376	93.6665	70.9178	67.222	56.0255	46.1172	31.8074	37.5979	39.0591	37.9507	98.01	41.4263	0.422674	-1.24238	0.00410467	1.90968	down	--	--	--	--	--	--	HMDB0015548	175865-60-8	Organic compounds	Organic acids and derivatives	Carboxylic acids and derivatives	--	Animals
pos_1150	Cephalomannine	256.771	323.192	288.242	233.736	224.196	250.586	186.496	172.097	156.335	167.674	168.981	144.792	262.787	166.063	0.631929	-0.662167	0.000745146	2.0495	down	--	--	--	--	--	--	HMDB0249807	--	Organic compounds	Lipids and lipid-like molecules	Prenol lipids	--	Animals
pos_1163	Chenodeoxycholyltryptophan	1306.49	846.714	566.523	715.955	669.663	667.958	473.299	464.292	454.137	428.639	430.293	452.377	795.551	450.506	0.566282	-0.820408	0.0246018	1.63482	down	--	--	--	--	--	--	HMDB0242395	--	Organic compounds	Lipids and lipid-like molecules	Steroids and steroid derivatives	--	Animals
pos_1193	13-Nor-6-eremophilene-8,11-dione	6.4518	26.2135	6.06636	21.2373	21.2626	17.1657	28.5922	26.6863	24.9587	44.5523	33.7888	27.5775	16.3995	31.026	1.89188	0.919821	0.0091854	1.67697	up	--	--	--	--	--	--	HMDB0037606	348119-85-7	Organic compounds	Lipids and lipid-like molecules	Prenol lipids	--	Animals
pos_1342	Himbacine	25.2449	32.3475	34.3846	31.2679	37.3503	36.9367	42.2505	51.9724	49.9234	39.4852	45.5979	41.3387	32.922	45.0947	1.36974	0.453906	0.00127066	1.91528	up	--	--	--	--	--	--	--	--	--	--	--	--	--
pos_1348	Vinaginsenoside R3	49.0465	44.972	53.2083	57.8452	45.2804	64.0255	37.8239	51.3318	38.1547	29.7477	36.1731	38.6316	52.3963	38.6438	0.737529	-0.439228	0.00843858	1.63857	down	--	--	--	--	--	--	HMDB0040493	156012-92-9	Organic compounds	Lipids and lipid-like molecules	Prenol lipids	--	Animals
pos_1359	6-Deoxohomodolichosterone	201.63	232.302	218.306	225.938	215.628	188.96	183.494	201.549	204.155	168.518	180.409	182.473	213.794	186.766	0.87358	-0.194988	0.0105681	1.64695	down	--	--	--	--	--	--	HMDB0034430	110345-06-7	Organic compounds	Lipids and lipid-like molecules	Steroids and steroid derivatives	--	Animals
pos_1365	PE(14:1(9Z)/22:0)	336.951	319.206	314.757	338.868	329.056	353.199	315.226	324.062	325.119	290.763	286.11	281.113	332.006	303.732	0.914839	-0.12841	0.0195917	1.45954	down	--	--	LMGP02010447	Glycerophospholipids [GP]	Glycerophosphoethanolamines [GP02]	Diacylglycerophosphoethanolamines [GP0201]	HMDB0008874	--	Organic compounds	Lipids and lipid-like molecules	Glycerophospholipids	--	Animals
pos_1398	Ribitol	130.528	184.911	171.773	122.222	158.725	167.95	6.10832	4.2951	4.84565	10.9741	6.67332	4.66669	156.018	6.26053	0.040127	-4.63928	2.16e-05	2.27515	down	C00474	Pentose and glucuronate interconversions(ko00040);;Riboflavin metabolism(ko00740);;Metabolic pathways(ko01100)	--	--	--	--	HMDB0000508	488-81-3	Organic compounds	Organic oxygen compounds	Organooxygen compounds	--	Animals
pos_1400	(2S)-2-Amino-6-[(3-formylpiperidin-1-yl)amino]hexanoic acid	56.4138	70.7145	66.3841	53.5352	54.6474	57.6139	49.8274	58.4997	48.3302	54.1874	43.6147	42.3756	59.8848	49.4725	0.826128	-0.275563	0.021239	1.50225	down	--	--	--	--	--	--	HMDB0255325	--	Organic compounds	Organic acids and derivatives	Carboxylic acids and derivatives	--	Animals
pos_1418	LysoPE(P-18:0/0:0)	265.386	216.046	194.801	261.273	204.676	193.916	215.968	199.514	198.632	144.094	161.728	145.767	222.683	177.617	0.797624	-0.326219	0.0337367	1.36316	down	--	--	LMGP02070002	Glycerophospholipids [GP]	Glycerophosphoethanolamines [GP02]	1Z-alkenylglycerophosphoethanolamines [GP0207]	HMDB0240598	174062-73-8	Organic compounds	Lipids and lipid-like molecules	Glycerophospholipids	--	Animals
pos_1479	Isodesmosine	105.143	112.357	131.066	115.637	63.6896	131.482	210.813	200.922	192.391	177.079	177.416	133.223	109.896	181.974	1.65588	0.727597	0.000766462	1.98663	up	--	--	--	--	--	--	HMDB0000739	991-01-5	Organic compounds	Organic acids and derivatives	Carboxylic acids and derivatives	--	Animals
pos_1486	LysoPI(20:4(5Z,8Z,11Z,14Z)/0:0)	3182.98	3376.2	3349.89	3223.9	1984.81	3075.77	6117.2	5543.24	4700.68	4249.06	4299.6	3192.34	3032.26	4683.69	1.54462	0.627252	0.00929553	1.79387	up	--	--	LMGP06050006	Glycerophospholipids [GP]	Glycerophosphoinositols [GP06]	Monoacylglycerophosphoinositols [GP0605]	HMDB0061690	1246430-04-5	Organic compounds	Lipids and lipid-like molecules	Glycerophospholipids	--	Animals
pos_1487	Coroloside	4124.67	4945.53	5427.44	5008.29	3345.38	4971.48	7840.86	8099.62	7010.49	6497.78	6573.25	5168.22	4637.13	6865.04	1.48045	0.566034	0.00230611	1.90713	up	--	--	--	--	--	--	HMDB0033703	57361-71-4	Organic compounds	Lipids and lipid-like molecules	Glycerolipids	--	Animals
pos_1488	Trp Arg Arg Tyr	1220.55	1530	1387.7	1756.24	1128.69	1613.81	2349.52	2416.14	2058.63	2084.24	2097.32	1711.3	1439.5	2119.53	1.47241	0.558178	0.000714575	2.00007	up	--	--	--	--	--	--	--	--	--	--	--	--	--
pos_1490	Eribulin	475.13	509.04	589.784	536.038	360.063	527.172	667.932	780.756	680.907	641.881	647.408	524.328	499.538	657.202	1.31562	0.395743	0.00673964	1.73675	up	--	--	--	--	--	--	HMDB0244959	--	Organic compounds	Organoheterocyclic compounds	Pyridines and derivatives	--	Animals
pos_1491	(R)-3-((2-(2-(4-Methylpiperidin-1-yl)ethyl)pyrrolidin-1-yl)sulfonyl)phenol	2477.87	2835.43	3170.89	2957.59	2014.28	2937.92	4009.06	4585.14	4164.89	3934.95	3967.91	2969.57	2732.33	3938.59	1.44148	0.527546	0.00159957	1.91879	up	--	--	--	--	--	--	HMDB0245575	--	Organic compounds	Benzenoids	Benzene and substituted derivatives	--	Animals
pos_1494	PG(a-17:0/5-iso PGF2VI)	70.6723	58.4918	58.7907	37.7335	54.4772	42.2172	28.3303	41.1299	46.2058	36.6178	52.0523	33.1432	53.7305	39.5799	0.736638	-0.440973	0.0441579	1.42553	down	--	--	--	--	--	--	HMDB0270782	--	_	_	_	--	Animals
pos_1521	Ascladiol	93.9042	130.323	111.805	114.065	106.524	107.425	165.229	171.422	167.911	155.199	140.293	187.696	110.675	164.625	1.48747	0.57286	8.3e-05	2.09044	up	--	--	--	--	--	--	HMDB0029610	32013-85-7	Organic compounds	Organoheterocyclic compounds	Dihydrofurans	--	Animals
pos_1522	6-Hydroxydopamine hydrochloride	25.9004	39.2347	33.3088	35.6031	33.9732	38.6482	50.6485	45.5541	51.4206	47.1052	47.3609	49.9286	34.4447	48.6696	1.41298	0.498739	0.000295601	2.10506	up	--	--	--	--	--	--	--	--	--	--	--	--	--
pos_1524	4-Formylsalicylic acid	2015.82	2893.73	2554.84	2630.19	2373.19	2449.9	3574.82	3626.68	3716.4	3376.39	3328.21	3904.99	2486.28	3587.92	1.44309	0.529157	3.53e-05	2.13053	up	--	--	--	--	--	--	--	--	--	--	--	--	--
pos_1525	Phthalic acid Mono-2-ethylhexyl Ester	1852	2610.29	2481.3	2463.75	2341.07	2357.98	3272.11	3298.43	3368.77	3055.22	3004.94	3446.76	2351.07	3241.04	1.37854	0.463141	8.34e-05	2.10898	up	--	--	--	--	--	--	--	--	--	--	--	--	--
pos_1526	Nizatidine	60.7109	71.2414	70.9019	74.2432	76.8084	75.7913	93.0095	111.542	94.2824	109.593	96.1256	104.14	71.6162	101.449	1.41656	0.502394	4.16e-05	2.13048	up	--	--	--	--	--	--	HMDB0259636	--	Organic compounds	Organoheterocyclic compounds	Azoles	--	Animals
pos_1527	Dioctyl Phthalate	43175.8	51402.4	48645.3	45640.6	43680.9	43494.8	65365	66305.7	66799.2	56509.7	53779.8	62619.7	46006.6	61896.5	1.34538	0.428016	0.000269121	2.07478	up	--	--	--	--	--	--	--	--	--	--	--	--	--
pos_1530	Withanolide B	62.6194	95.7636	80.1729	92.6009	100.298	111.998	125.809	138.563	144.797	138.519	139.965	148.796	90.5754	139.408	1.53914	0.622125	0.000392985	2.08058	up	C00828	--	--	--	--	--	HMDB0030020	56973-41-2	Organic compounds	Lipids and lipid-like molecules	Prenol lipids	--	Animals
pos_1539	PE(14:0/24:0)	26.3159	47.895	45.6665	62.2461	45.5753	35.5169	53.2702	84.6582	77.1111	60.3677	69.8284	85.3719	43.8693	71.7679	1.63595	0.710128	0.00336381	1.75241	up	C00350	--	--	--	--	--	HMDB0008848	--	Organic compounds	Lipids and lipid-like molecules	Glycerophospholipids	--	Animals
pos_1546	PC(18:3(9Z,12Z,15Z)/24:0)	2298.49	2823.71	2875.04	2817.87	2888.76	2726.9	1858.28	1246.09	2192.49	2070.86	2071.48	2137.25	2738.46	1929.41	0.70456	-0.505206	0.00126159	1.9684	down	--	--	--	--	--	--	HMDB0008223	--	Organic compounds	Lipids and lipid-like molecules	Glycerophospholipids	--	Animals
pos_1551	4alpha-carboxy-4beta,14alpha-dimethyl-9beta,19-cyclo-5alpha-ergost-24(241)-en-3beta-ol	59.434	74.7023	73.9037	44.748	52.8011	41.1636	45.4119	47.1664	43.9764	31.0989	39.8025	31.039	57.7921	39.7492	0.687796	-0.539947	0.0264637	1.53991	down	--	--	--	--	--	--	HMDB0304190	--	Organic compounds	Lipids and lipid-like molecules	Steroids and steroid derivatives	--	Animals
pos_1742	Lauroyl diethanolamide	3016.78	4383.93	3760.33	3718.52	3672.9	3639.97	76.7353	66.4484	76.6444	62.1341	59.8633	66.381	3698.74	68.0344	0.018394	-5.76462	5.11e-06	2.29739	down	--	--	LMFA08040058	Fatty Acyls [FA]	Fatty amides [FA08]	N-acyl ethanolamines (endocannabinoids) [FA0804]	HMDB0032358	120-40-1	Organic compounds	Lipids and lipid-like molecules	Fatty Acyls	--	Animals
pos_1746	Hexadecasphingosine	80.0925	131.726	117.161	124.116	120.086	134.498	8.02e-08	7.89e-08	7.92e-08	7.21e-08	7.12e-08	6.76e-08	117.947	7.49e-08	6.35e-10	-30.5533	2.66e-05	2.26651	down	--	--	LMSP01040008	Sphingolipids [SP]	Sphingoid bases [SP01]	Sphingoid base homologs and variants [SP0104]	HMDB0242181	--	Organic compounds	Organic nitrogen compounds	Organonitrogen compounds	--	Animals
pos_1751	10-Methylicosanoylcarnitine	2230.17	3701.02	2757.81	2253.09	2261.17	2301.3	0.162324	0.305758	0.562899	0.591046	0.585399	1.25101	2584.09	0.576406	0.00022306	-12.1303	0.000114779	2.23736	down	--	--	--	--	--	--	HMDB0240913	--	Organic compounds	Lipids and lipid-like molecules	Fatty Acyls	--	Animals
pos_1753	Alectrol	37.8798	37.8102	54.2366	45.9784	51.0533	34.2696	58.0394	64.2507	59.0296	54.6486	49.7086	49.6207	43.538	55.8829	1.28354	0.360133	0.0137736	1.61734	up	C09059	--	--	--	--	--	HMDB0041372	143572-84-3	Organic compounds	Organoheterocyclic compounds	Lactones	--	Animals
pos_1767	4-Megastigmene-6a,9R-diol 9-[apiosyl-(1->6)-glucoside]	88.5913	77.2546	67.2667	68.1756	66.6682	65.228	41.7462	34.5014	33.3434	50.9406	34.922	36.0479	72.1974	38.5836	0.534418	-0.90396	4.15e-05	2.12894	down	--	--	--	--	--	--	--	--	--	--	--	--	--
pos_1839	DG(18:0/20:4(6Z,8E,10E,14Z)-2OH(5S,12R)/0:0)	227.964	222.349	204.701	176	195.106	192.947	372.786	317.66	314.559	266.111	193.283	291.023	203.178	292.57	1.43997	0.526041	0.0133122	1.76807	up	--	--	--	--	--	--	HMDB0295887	--	_	_	_	--	Animals
pos_1876	Hexenoylcarnitine	63.3845	103.525	74.5721	77.9094	77.5552	80.8265	8.02e-08	7.89e-08	7.92e-08	7.21e-08	7.12e-08	6.76e-08	79.6287	7.49e-08	9.4e-10	-29.9865	2.55e-05	2.26942	down	--	--	--	--	--	--	HMDB0253155	--	Organic compounds	Organic acids and derivatives	Keto acids and derivatives	--	Animals
pos_1902	DG(22:6(4Z,7Z,10Z,13Z,16Z,19Z)/22:6(4Z,7Z,10Z,13Z,16Z,19Z)/0:0)	5964.6	5386.32	3741.49	4783.08	5086.53	5293.02	7486.7	7232.16	6990.19	6531.22	5131.17	6271.82	5042.51	6607.21	1.3103	0.3899	0.00707293	1.77353	up	--	--	LMGL02010306	Glycerolipids [GL]	Diradylglycerols [GL02]	Diacylglycerols [GL0201]	HMDB0007788	--	Organic compounds	Lipids and lipid-like molecules	Glycerolipids	--	Animals
pos_2078	DG(18:2n6/0:0/20:4n6)	312.228	336.226	375.403	738.272	623.212	939.427	1120.46	1163.93	1071.39	856.713	770.556	872.702	554.128	975.959	1.76125	0.816601	0.00836099	1.77733	up	--	--	--	--	--	--	HMDB0056286	--	Organic compounds	Lipids and lipid-like molecules	Fatty Acyls	--	Animals
pos_2092	DG(14:0/18:0/0:0)	1774.62	2385.53	2383.87	2355.21	2692.74	1873.76	1381.74	364.325	2038.43	1472.34	1356.71	1219.92	2244.29	1305.58	0.581733	-0.78157	0.00657233	1.75804	down	--	--	LMGL02010383	Glycerolipids [GL]	Diradylglycerols [GL02]	Diacylglycerols [GL0201]	HMDB0007013	--	Organic compounds	Lipids and lipid-like molecules	Glycerolipids	--	Animals
pos_2137	PS(15:0/20:1(11Z))	1665.25	1487.98	1117.76	1380.59	1327.51	1364.6	2206.72	2236.04	2192.48	1728.88	1304.46	1634.89	1390.61	1883.91	1.35473	0.438008	0.0249085	1.62947	up	--	--	LMGP03010151	Glycerophospholipids [GP]	Glycerophosphoserines [GP03]	Diacylglycerophosphoserines [GP0301]	HMDB0112285	--	Organic compounds	Lipids and lipid-like molecules	Glycerophospholipids	--	Animals
pos_2140	SM(d17:1/18:3(9,11,15)-OH(13))	3716.15	3156.93	2291.91	2631.64	2832.75	3008.66	4845.37	4761.54	4727.4	3755.74	2989.95	3566.73	2939.67	4107.79	1.39736	0.482705	0.0133942	1.70917	up	--	--	--	--	--	--	HMDB0290393	--	_	_	_	--	Animals
pos_2477	Cyclic Urea	23.6963	33.7322	25.4752	20.784	24.7216	27.8453	16.7898	21.8382	19.8879	17.2761	15.1882	13.6867	26.0424	17.4445	0.669848	-0.578094	0.00353718	1.78053	down	--	--	--	--	--	--	HMDB0250626	--	Organic compounds	Organoheterocyclic compounds	Diazepanes	--	Animals
pos_2478	L-galacto-2-Heptulose	25.6865	34.8777	36.06	35.3439	34.2877	32.915	24.3016	21.318	23.4719	19.8007	22.5138	21.0897	33.1951	22.0826	0.665237	-0.588059	0.000365741	2.08577	down	--	--	--	--	--	--	HMDB0029901	60426-79-1	Organic compounds	Organic oxygen compounds	Organooxygen compounds	--	Animals
pos_2481	1-Rhamnono-1,4-lactone	64.8086	134.609	70.2455	59.569	71.8879	76.1177	24.5712	29.04	29.5217	30.3356	26.7762	24.3378	79.5397	27.4304	0.344865	-1.5359	0.00555825	1.91128	down	--	--	--	--	--	--	HMDB0302823	20031-16-7	Organic compounds	Organoheterocyclic compounds	Lactones	--	Animals
pos_2482	(2S)-2-[[(2S)-2-Amino-3-(1H-imidazol-5-yl)propanoyl]-(2-benzamidoethyl)amino]-4-methylpentanoic acid	267.263	399.157	329.582	335.016	348.764	321.798	409.274	401.348	420.297	408.263	381.098	376.894	333.597	399.529	1.19764	0.260195	0.0108444	1.75279	up	--	--	--	--	--	--	HMDB0257607	--	Organic compounds	Organic acids and derivatives	Carboxylic acids and derivatives	--	Animals
pos_2483	3-O-Methyl-D-glucopyranose	140.373	173.966	181.637	166.419	195.002	192.262	8.02e-08	7.89e-08	7.92e-08	3.15837	0.981399	6.76e-08	174.943	0.689962	0.00394392	-7.98615	4.01e-06	2.29713	down	--	--	--	--	--	--	HMDB0245958	--	Organic compounds	Organic oxygen compounds	Organooxygen compounds	--	Animals
pos_2487	Progoitrin	32.3321	34.5448	29.0718	30.5997	30.9138	27.306	52.7694	49.9236	49.1348	56.0309	45.112	41.2897	30.7947	49.0434	1.59259	0.671376	0.000107671	2.1781	up	C08425	--	--	--	--	--	HMDB0034071	585-95-5	Organic compounds	Organic oxygen compounds	Organooxygen compounds	--	Animals
pos_2489	2,3-Butanediol apiosylglucoside	17.5515	20.2259	16.6935	19.8877	12.7929	19.4899	32.2771	30.7345	28.7469	28.8738	33.4958	26.5368	17.7736	30.1108	1.69413	0.760549	1.3e-05	2.18495	up	--	--	--	--	--	--	HMDB0033063	--	Organic compounds	Organic oxygen compounds	Organooxygen compounds	--	Animals
pos_2490	Indazole	406.712	550.862	504.918	492.915	493.443	499.034	610.559	605.548	609.685	571.908	536.598	546.77	491.314	580.178	1.18087	0.23985	0.00425396	1.82619	up	--	--	--	--	--	--	HMDB0244884	271-44-3	Organic compounds	Organoheterocyclic compounds	Benzopyrazoles	--	Animals
pos_2505	4-(2-Aminoethyl)cyclohexa-3,5-diene-1,2-diol	222.834	254.891	187.588	196.626	211.37	195.692	179.527	136.813	146.615	187.852	159.765	156.688	211.5	161.21	0.762222	-0.391717	0.00317406	1.7955	down	--	--	--	--	--	--	HMDB0257596	--	Organic compounds	Organic oxygen compounds	Organooxygen compounds	--	Animals
pos_2506	L-Phenylalanine	52.0886	59.6714	40.7477	40.0261	42.4981	45.6449	42.8868	26.2673	32.136	41.9802	37.1611	36.6623	46.7795	36.1823	0.773466	-0.370591	0.0264025	1.46991	down	C00079	Phenylalanine metabolism(ko00360);;Phenylalanine, tyrosine and tryptophan biosynthesis(ko00400);;Cyanoamino acid metabolism(ko00460);;D-Amino acid metabolism(ko00470);;Phenylpropanoid biosynthesis(ko00940);;Tropane, piperidine and pyridine alkaloid biosynthesis(ko00960);;Glucosinolate biosynthesis(ko00966);;Aminoacyl-tRNA biosynthesis(ko00970);;Biosynthesis of various alkaloids(ko00996);;Biosynth…	--	--	--	--	HMDB0000159	63-91-2	Organic compounds	Organic acids and derivatives	Carboxylic acids and derivatives	--	Microbe,Animals
pos_2509	LysoPA(8:0/0:0)	79.3119	90.8157	86.3172	76.9841	76.6913	70.0892	52.4494	52.3373	46.289	41.4095	42.9724	42.4549	80.0349	46.3187	0.578732	-0.789034	8.42e-06	2.19462	down	--	--	--	--	--	--	HMDB0114740	--	Organic compounds	Lipids and lipid-like molecules	Glycerophospholipids	--	Animals
pos_2546	Lepidimoic acid	40.1919	42.7607	44.8281	30.4907	46.1879	30.9647	31.0319	32.3418	33.5409	31.609	27.6978	30.3339	39.2373	31.0925	0.792423	-0.335658	0.033028	1.56313	down	--	--	--	--	--	--	HMDB0041096	157676-09-0	Organic compounds	Organic oxygen compounds	Organooxygen compounds	--	Animals
pos_2585	Lycodine	223.582	304.49	273.472	219.547	236.563	224.584	341.511	352.003	369.509	294.859	311.912	330.296	247.04	333.348	1.34937	0.432287	0.000809161	1.94432	up	--	--	--	--	--	--	HMDB0254255	--	Organic compounds	Organoheterocyclic compounds	Phenanthrolines	--	Animals
pos_2596	1H-Indol-2-amine	32.6248	44.9415	36.7407	40.1041	39.7573	39.2496	46.9897	50.9256	51.9588	51.5233	47.3388	44.0656	38.903	48.8003	1.25441	0.327009	0.000980387	1.95786	up	--	--	--	--	--	--	--	--	--	--	--	--	--
pos_2598	Aspartyl-Alanine	150.784	152.531	185.929	182.906	172.442	182.062	81.5515	72.4387	74.4219	59.8649	57.2918	57.8471	171.109	67.236	0.392942	-1.34761	4.29e-07	2.25051	down	--	--	--	--	--	--	HMDB0028746	--	Organic compounds	Organic acids and derivatives	Carboxylic acids and derivatives	--	Animals
pos_2602	Cyclopassifloic acid B	31.3578	37.8297	29.639	24.979	29.9253	23.5616	65.373	58.1289	72.979	42.5192	40.6878	52.2334	29.5487	55.3202	1.87217	0.904711	0.00290802	1.94713	up	--	--	--	--	--	--	HMDB0038388	292167-35-2	Organic compounds	Lipids and lipid-like molecules	Steroids and steroid derivatives	--	Animals
pos_2603	Kynuramine	27.0961	40.1955	38.0946	32.7159	41.4673	32.1706	60.7012	57.9425	58.6963	51.2472	60.4319	53.5515	35.29	57.0951	1.61788	0.694107	2.55e-05	2.166	up	--	--	--	--	--	--	HMDB0012246	363-36-0	Organic compounds	Organic oxygen compounds	Organooxygen compounds	--	Animals
pos_2604	Pebulate	16.2215	24.5145	18.5602	22.3248	18.3164	20.8965	42.6543	41.0056	37.7779	30.2004	32.4741	33.1897	20.139	36.217	1.79835	0.846677	0.00013389	2.14746	up	C18755	--	--	--	--	--	HMDB0256192	--	Organic compounds	Organosulfur compounds	Thiocarbonyl compounds	--	Animals
pos_2606	2'-O-Methyladenosine	34.9623	47.2591	45.7716	47.7565	42.3115	49.3755	33.704	30.618	31.8399	26.9016	31.4738	30.2223	44.5727	30.7933	0.690854	-0.533547	0.000692316	2.02636	down	C04779	--	--	--	--	--	HMDB0004326	2140-79-6	Organic compounds	Nucleosides, nucleotides, and analogues	Purine nucleosides	--	Animals
pos_2608	DL-Sulforaphane	38.507	43.1806	55.2389	52.5603	54.6036	45.2047	21.9576	17.3594	13.197	13.9705	17.8516	12.5065	48.2159	16.1404	0.334753	-1.57883	1.2e-05	2.21373	down	--	--	--	--	--	--	--	--	--	--	--	--	--
pos_2610	Pamidronate	72.8064	97.5115	122.569	114.71	115.194	111.616	20.8285	19.4213	22.664	19.9515	13.6826	14.2722	105.735	18.47	0.174683	-2.51719	5.1e-05	2.24095	down	C07395	--	--	--	--	--	HMDB0014427	40391-99-9	Organic compounds	Organic acids and derivatives	Organic phosphonic acids and derivatives	--	Animals
pos_2689	Debrisoquine	2.06368	2.3286	2.78629	7.22e-08	4.0842	7.22e-08	11.9171	18.4058	10.9863	14.3599	10.4329	14.8441	1.87713	13.491	7.18705	2.8454	4.05e-05	2.16626	up	C13650	--	--	--	--	--	HMDB0006543	1131-64-2	Organic compounds	Organoheterocyclic compounds	Tetrahydroisoquinolines	--	Animals
pos_2691	Schleicherastatin 5	6.95e-08	8.06e-08	7.67e-08	7.22e-08	7.26e-08	7.22e-08	1.49623	2.42148	1.51444	4.06122	7.59175	3.53225	7.4e-08	3.43623	4.64507e+07	25.4692	0.0142912	1.71553	up	--	--	--	--	--	--	HMDB0035804	256445-58-6	Organic compounds	Lipids and lipid-like molecules	Steroids and steroid derivatives	--	Animals
pos_2693	3-Hydroxytetradecanedioic acid	119.673	178.423	158.346	159.335	168.855	156.226	220.369	228.31	240.327	215.889	212.182	221.873	156.81	223.158	1.42312	0.509053	0.000130997	2.13717	up	--	--	LMFA01170094	Fatty Acyls [FA]	Fatty Acids and Conjugates [FA01]	Dicarboxylic acids [FA0117]	HMDB0000394	73179-89-2	Organic compounds	Lipids and lipid-like molecules	Fatty Acyls	--	Animals
pos_2695	B-Octylglucoside	23.5324	32.7164	25.7904	21.3059	27.6602	18.2766	55.6987	68.1629	68.0921	49.37	48.8758	51.0873	24.8803	56.8811	2.28619	1.19295	7.16e-05	2.15784	up	--	--	--	--	--	--	HMDB0245753	29836-26-8	Organic compounds	Lipids and lipid-like molecules	Fatty Acyls	--	Animals
pos_2697	L-Norleucine	27.3842	33.5621	32.2189	23.1808	28.9079	35.3389	23.4774	20.323	20.5104	25.9974	22.7148	25.0639	30.0988	23.0145	0.764631	-0.387165	0.00979799	1.71965	down	C01933	--	LMFA01100042	Fatty Acyls [FA]	Fatty Acids and Conjugates [FA01]	Amino fatty acids [FA0110]	HMDB0001645	327-57-1	Organic compounds	Organic acids and derivatives	Carboxylic acids and derivatives	--	Microbe,Animals,Plants
pos_2698	N-Myristoyl Phenylalanine	50.9632	63.5066	61.9191	53.5375	48.3663	50.7021	8.02e-08	7.89e-08	7.92e-08	7.21e-08	7.12e-08	6.76e-08	54.8325	7.49e-08	1.37e-09	-29.4482	4.34e-06	2.30615	down	--	--	--	--	--	--	HMDB0242057	--	Organic compounds	Organic acids and derivatives	Carboxylic acids and derivatives	--	Animals
pos_2703	iodo tyrosine	39.7964	54.0196	67.9306	70.7434	77.7449	69.2572	16.4161	17.7559	19.5454	17.6859	15.8079	20.919	63.2487	18.0217	0.284934	-1.8113	0.00043333	2.16008	down	--	--	--	--	--	--	HMDB0253516	--	Organic compounds	Organic acids and derivatives	Carboxylic acids and derivatives	--	Animals
pos_2709	beta-D-Glucopyranosylurea	22.6882	31.9881	27.8962	20.26	20.4268	24.5329	8.02e-08	7.89e-08	7.92e-08	2.2525	1.15195	1.73725	24.632	0.856951	0.0347901	-4.84518	3.26e-05	2.26293	down	--	--	--	--	--	--	HMDB0249119	--	Organic compounds	Organic oxygen compounds	Organooxygen compounds	--	Animals
pos_2716	Edrophonium	231.419	313.066	268.59	257.855	254.981	274.811	8.02e-08	7.89e-08	7.92e-08	0.887039	7.12e-08	6.76e-08	266.787	0.14784	0.00055415	-10.8174	2.3e-06	2.30364	down	C06976	--	--	--	--	--	HMDB0015145	116-38-1	Organic compounds	Benzenoids	Benzene and substituted derivatives	--	Animals
pos_2717	Talaromycin A	18.8658	27.7565	24.9667	22.1782	25.6982	24.3498	37.2882	39.3432	42.9986	36.1245	37.1826	38.1959	23.9692	38.5222	1.60715	0.684506	5.65e-06	2.19527	up	--	--	--	--	--	--	--	--	--	--	--	--	--
pos_2724	Ginsenoyne A	37.2358	56.557	58.8893	53.8248	55.627	52.0181	86.7678	79.3988	83.1448	69.1441	74.0439	71.1806	52.3587	77.28	1.47597	0.561666	0.000169533	2.07128	up	--	--	LMFA05000661	Fatty Acyls [FA]	Fatty alcohols [FA05]	-	HMDB0039107	139163-34-1	Organic compounds	Lipids and lipid-like molecules	Fatty Acyls	--	Animals
pos_2726	N-Oleoyl phenylalanine	55.2144	65.3581	67.6971	48.6019	50.7649	48.9145	8.02e-08	7.89e-08	7.92e-08	7.21e-08	7.12e-08	6.76e-08	56.0918	7.49e-08	1.33e-09	-29.481	1.61e-05	2.29384	down	--	--	LMFA08020092	Fatty Acyls [FA]	Fatty amides [FA08]	N-acyl amines [FA0802]	HMDB0062336	--	Organic compounds	Organic acids and derivatives	Carboxylic acids and derivatives	--	Animals
pos_2727	Momordicoside L	38.1095	64.2188	51.7998	33.0673	41.5593	36.5072	90.1691	80.9906	95.5125	58.1973	56.5861	51.8423	44.2103	72.2163	1.63347	0.707941	0.0144453	1.67174	up	--	--	--	--	--	--	HMDB0035917	81348-83-6	Organic compounds	Lipids and lipid-like molecules	Steroids and steroid derivatives	--	Animals
pos_2729	Evocarpine	264.827	317.49	318.023	301.188	306.249	318.151	181.114	181.82	181.929	169.435	171.32	150.211	304.321	172.638	0.56729	-0.817843	7.5e-07	2.2492	down	C16956	--	--	--	--	--	--	--	--	--	--	--	--
pos_2730	Delphinidin 3-rhamnoside	61.8224	67.3073	58.4799	67.7566	61.6087	60.9388	67.638	92.3755	81.8389	95.7879	83.7488	86.8407	62.9856	84.705	1.34483	0.427424	0.00194528	1.94094	up	--	--	--	--	--	--	HMDB0303800	--	Organic compounds	Phenylpropanoids and polyketides	Flavonoids	--	Animals
pos_2733	Isopropyl beta-D-glucoside	29.0508	41.3422	22.2661	22.4002	26.3938	32.8489	7.81708	3.67791	9.901	12.358	8.06819	6.2554	29.0503	8.01293	0.275829	-1.85815	0.000389762	2.08022	down	--	--	--	--	--	--	HMDB0032705	5391-17-3	Organic compounds	Organic oxygen compounds	Organooxygen compounds	--	Animals
pos_2739	gamma-Glutamyl-beta-aminopropiononitrile	26.3601	36.9566	38.0201	35.4465	45.9993	27.9518	51.0507	54.1453	62.2082	45.4771	54.8997	54.2572	35.1224	53.673	1.52817	0.611806	0.000632297	1.95095	up	C06114	Cyanoamino acid metabolism(ko00460)	--	--	--	--	HMDB0060477	--	Organic compounds	Organic acids and derivatives	Carboxylic acids and derivatives	--	Animals
pos_2754	3-Deoxyarabinohexonic acid	26.5057	43.617	49.9497	45.514	39.5493	48.3315	52.2949	58.5243	68.9226	69.2566	64.994	51.9791	42.2445	60.9953	1.44386	0.529933	0.00273968	1.80749	up	--	--	--	--	--	--	HMDB0000346	29625-79-4	Organic compounds	Organic acids and derivatives	Hydroxy acids and derivatives	--	Animals
pos_2755	2-Amino-2,3,6,7-tetrahydro-1H-pteridin-4-one	18.6422	31.1448	39.7759	32.8247	29.8294	30.2389	30.3487	35.563	46.9759	47.5006	40.3612	39.0897	30.4093	39.9732	1.3145	0.394519	0.033419	1.37259	up	--	--	--	--	--	--	HMDB0255369	--	Organic compounds	Organoheterocyclic compounds	Pteridines and derivatives	--	Animals
pos_2757	Formyl-5-hydroxykynurenamine	57.0537	84.9003	111.654	97.0009	86.3388	88.6708	93.7581	105.55	151.199	150.661	135.162	109.308	87.603	124.273	1.41859	0.504461	0.0161407	1.54273	up	C05647	Tryptophan metabolism(ko00380)	--	--	--	--	HMDB0012948	958733-17-0	Organic compounds	Organic oxygen compounds	Organooxygen compounds	--	Animals
pos_2759	N-Benzylphthalimide	4045.16	6424.92	7640.16	7126.37	6964.92	6915.95	7054.33	8054.8	10135.5	10603.3	9244.41	8866.52	6519.58	8993.15	1.37941	0.464047	0.0078541	1.6402	up	--	--	--	--	--	--	--	--	--	--	--	--	--
pos_2763	DG(8:0/18:3(10,12,15)-OH(9)/0:0)	88.9471	112.263	94.4741	68.9374	61.9516	60.6575	64.6027	56.4512	72.5511	44.0451	51.892	46.4302	81.2051	55.9954	0.689555	-0.536263	0.0312702	1.49059	down	--	--	--	--	--	--	HMDB0297239	--	_	_	_	--	Animals
pos_2764	(17E)-1伪,25-dihydroxy-26,27-dimethyl-17,20,22,22,23,23-hexadehydro-24a-homovitamin D3 / (17E)-1伪,25-dihydroxy-26,27-dimethyl-17,20,22,22,23,23-hexadehydro-24a-homocholecalciferol	889.181	1058.69	1016.43	950.819	950.752	955.861	767.85	825.23	814.363	696.445	693.91	649.93	970.288	741.288	0.763987	-0.388379	0.000145736	2.03205	down	--	--	--	--	--	--	--	--	--	--	--	--	--
pos_2765	(S)-a-Amino-2,5-dihydro-5-oxo-4-isoxazolepropanoic acid N2-glucoside	6.67357	9.67763	15.746	17.7779	11.5924	15.6548	31.3255	41.1502	45.8781	41.0424	45.9925	31.9205	12.8537	39.5515	3.07705	1.62155	1.96e-05	2.17161	up	--	--	--	--	--	--	HMDB0029404	29790-46-3	Organic compounds	Organic oxygen compounds	Organooxygen compounds	--	Animals
pos_2766	Phenol	26.205	31.7843	29.1454	30.1146	23.2544	26.7453	19.205	25.5236	21.5615	22.0034	17.0963	19.9195	27.8748	20.8849	0.749238	-0.416504	0.00228602	1.82922	down	C15584	Tyrosine metabolism(ko00350);;Chlorocyclohexane and chlorobenzene degradation(ko00361);;Benzoate degradation(ko00362);;Aminobenzoate degradation(ko00627);;Metabolic pathways(ko01100);;Microbial metabolism in diverse environments(ko01120);;Degradation of aromatic compounds(ko01220);;Protein digestion and absorption(ko04974);;Chemical carcinogenesis - reactive oxygen species(ko05208)	--	--	--	--	HMDB0000228	108-95-2	Organic compounds	Benzenoids	Phenols	--	Animals,Plants
pos_2806	N-Lauroyl Threonine	67.6944	138.216	64.84	71.3678	68.3196	69.0407	47.4478	55.7436	45.9081	55.3137	41.5526	41.069	79.9131	47.8391	0.598639	-0.740241	0.0399641	1.48442	down	--	--	--	--	--	--	HMDB0242041	--	Organic compounds	Organic acids and derivatives	Carboxylic acids and derivatives	--	Animals
pos_2819	2'-C-Methylcytidine	6.95e-08	2.3778	7.67e-08	1.96275	7.26e-08	7.22e-08	8.02e-08	1.65021	7.46822	6.25561	3.18231	4.43467	0.723425	3.83184	5.2968	2.40512	0.0419797	1.40004	up	--	--	--	--	--	--	HMDB0245530	--	Organic compounds	Nucleosides, nucleotides, and analogues	Pyrimidine nucleosides	--	Animals
pos_2841	Phenylheptatriyne	25.8892	41.4161	50.753	33.0743	38.4212	42.467	46.1941	44.1419	70.8347	66.0427	57.5642	43.0748	38.6701	54.642	1.41303	0.498792	0.0258256	1.47913	up	--	--	--	--	--	--	--	--	--	--	--	--	--
pos_2843	(3R)-3-Hydroxy-N-[(3S)-2-oxooxolan-3-yl]butanamide	22.7899	29.3199	32.6786	27.9672	26.0623	28.1977	29.205	29.8743	43.8328	42.0888	46.5339	34.6888	27.8359	37.7039	1.35451	0.437767	0.02128	1.53698	up	--	--	--	--	--	--	HMDB0243607	--	Organic compounds	Organic acids and derivatives	Carboxylic acids and derivatives	--	Animals
pos_2845	3'-AZIDO-2',3'-DIDEOXYURIDINE	7.81578	14.4158	17.025	13.2998	12.4266	18.2536	22.9476	24.1865	24.8269	40.5649	23.5293	26.0594	13.8728	27.0191	1.94763	0.961722	0.0032098	1.84404	up	--	--	--	--	--	--	HMDB0246087	--	Organic compounds	Nucleosides, nucleotides, and analogues	Pyrimidine nucleosides	--	Animals
pos_2846	N-(1-Deoxy-1-fructosyl)glycine	5364.01	8402.76	9875.79	8767.83	8533.04	8406.72	9342.26	10554.2	13740.7	14180.9	12429.1	11386.2	8225.03	11938.9	1.45153	0.537577	0.00384802	1.74432	up	--	--	--	--	--	--	HMDB0037848	60644-20-4	Organic compounds	Organic oxygen compounds	Organooxygen compounds	--	Animals
pos_2855	(1R,2R,3S,5S)-3-Hydroxy-4-(4-hydroxybenzoyl)-8-methyl-8-azabicyclo[3.2.1]octane-2-carboxylic acid	207.507	270.101	253.754	230.51	240.468	241.135	24.1416	13.2678	14.0819	13.8505	18.3172	18.1587	240.579	16.9696	0.0705365	-3.82549	8.17e-07	2.30747	down	--	--	--	--	--	--	HMDB0257666	--	Organic compounds	Organic oxygen compounds	Organooxygen compounds	--	Animals
pos_2883	1,2-Cyclohexanedicarboxylic acid	324.302	356.547	383.143	367.086	379.903	344.603	513.748	530.334	535.226	460.693	480.435	456.784	359.264	496.204	1.38117	0.465888	2.74e-05	2.18561	up	--	--	--	--	--	--	HMDB0250649	610-09-3	Organic compounds	Organic acids and derivatives	Carboxylic acids and derivatives	--	Animals
pos_2886	Avocadene 1-acetate	39.5026	43.2682	35.3888	31.4759	33.3436	34.8484	8.02e-08	7.89e-08	7.92e-08	1.67339	7.12e-08	6.76e-08	36.3046	0.278898	0.00768218	-7.02427	3.59e-06	2.29748	down	--	--	LMFA05000640	Fatty Acyls [FA]	Fatty alcohols [FA05]	-	HMDB0031043	24607-09-8	Organic compounds	Lipids and lipid-like molecules	Fatty Acyls	--	Animals
pos_2898	3-Phenyl-2-propenenitrile	14.8611	3.44124	12.242	9.67276	12.5309	10.8873	21.7942	17.2806	16.3226	20.6513	18.1335	7.34621	10.6059	16.9214	1.59548	0.673986	0.0390305	1.46254	up	--	--	--	--	--	--	HMDB0303365	--	Organic compounds	Benzenoids	Benzene and substituted derivatives	--	Animals
pos_2907	L-Anserine	67.8846	96.5938	76.2077	83.6957	82.107	80.3728	6.37118	9.91429	7.9036	6.86765	8.20531	3.28967	81.1436	7.09195	0.0874	-3.51622	3.16e-06	2.28614	down	C01262	Histidine metabolism(ko00340);;beta-Alanine metabolism(ko00410);;Metabolic pathways(ko01100)	--	--	--	--	HMDB0000194	584-85-0	Organic compounds	Organic acids and derivatives	Peptidomimetics	--	Microbe,Animals
pos_2941	Cytochalasin B	79.1997	94.7519	91.8801	79.4118	87.4922	75.81	72.3662	71.1461	86.9141	67.496	78.6678	71.2813	84.7576	74.6452	0.88069	-0.183293	0.0391957	1.42822	down	C19954	--	LMPK11000002	Polyketides [PK]	Cytochalasins [PK11]	-	--	--	--	--	--	--	--
pos_2997	Pyridoxamine 5'-phosphate	74.5755	40.6379	44.6354	41.1265	47.3223	45.6824	8.02e-08	7.89e-08	7.92e-08	7.21e-08	7.12e-08	6.76e-08	48.9967	7.49e-08	1.53e-09	-29.2859	0.000232399	2.20363	down	C00647	Vitamin B6 metabolism(ko00750);;Metabolic pathways(ko01100);;Vitamin digestion and absorption(ko04977)	--	--	--	--	HMDB0001555	529-96-4	Organic compounds	Organoheterocyclic compounds	Pyridines and derivatives	--	Microbe,Animals,Plants
pos_3000	Quinic acid	5.03101	12.9285	17.244	14.2509	13.5036	11.7476	15.8245	18.2027	24.2218	20.9295	22.1644	17.9266	12.4509	19.8782	1.59653	0.674935	0.00586319	1.70022	up	C00296	Phenylalanine, tyrosine and tryptophan biosynthesis(ko00400);;Metabolic pathways(ko01100)	--	--	--	--	HMDB0003072	77-95-2	Organic compounds	Organic oxygen compounds	Organooxygen compounds	--	Animals
pos_3001	D-Biopterin	1073.48	1829.29	2158.3	1869.17	1798.06	1837.3	2053.46	2279.7	2957.7	3085.79	2655.21	2448.51	1760.93	2580.06	1.46517	0.551066	0.0039371	1.73737	up	--	--	--	--	--	--	HMDB0000633	13039-62-8	Organic compounds	Organoheterocyclic compounds	Pteridines and derivatives	--	Animals
pos_3018	Glycineamideribotide	23.8042	31.0558	22.3226	22.5049	27.674	24.6044	14.1785	15.5571	12.8217	16.8632	16.4199	15.7539	25.3276	15.2657	0.602728	-0.73042	0.000324466	2.09807	down	C03838	Purine metabolism(ko00230);;Metabolic pathways(ko01100);;Biosynthesis of secondary metabolites(ko01110)	--	--	--	--	HMDB0002022	10074-18-7	Organic compounds	Nucleosides, nucleotides, and analogues	Glycinamide ribonucleotides	--	Microbe,Animals
pos_3044	Mutilin	13.6275	19.6523	14.1823	16.4631	22.1104	18.1356	54.5687	49.0106	49.694	53.3614	47.6299	34.0293	17.3619	48.049	2.7675	1.46859	3.71e-05	2.23846	up	--	--	--	--	--	--	HMDB0254962	1000195-48-5	Organic compounds	Lipids and lipid-like molecules	Prenol lipids	--	Animals
pos_3098	2-Amino-4-ethoxy-3-hydroxybutanoic acid	1.04733	8.06e-08	7.67e-08	1.04769	7.26e-08	7.22e-08	9.77226	5.60896	2.12559	1.57088	5.36808	1.22607	0.349171	4.27864	12.2537	3.61515	0.032588	1.64084	up	--	--	--	--	--	--	HMDB0032862	98644-37-2	Organic compounds	Organic acids and derivatives	Carboxylic acids and derivatives	--	Animals
pos_3112	nortestosterone laurate	35.5192	24.7937	38.6007	51.3158	35.4726	27.6788	8.02e-08	7.89e-08	7.92e-08	7.21e-08	7.12e-08	1.15424	35.5635	0.192373	0.00540928	-7.53035	0.00023886	2.20989	down	--	--	--	--	--	--	HMDB0255752	--	Organic compounds	Lipids and lipid-like molecules	Steroids and steroid derivatives	--	Animals
pos_3212	Acipimox	144.252	198.572	191.663	185.317	171.245	157.804	160.108	156.249	158.266	138.316	148.951	140.557	174.809	150.408	0.860413	-0.216899	0.0355224	1.47314	down	--	--	--	--	--	--	HMDB0247941	--	Organic compounds	Organoheterocyclic compounds	Diazines	--	Animals
pos_3226	Threoninyl-Gamma-glutamate	16.6416	17.5864	16.3924	14.3533	13.3482	12.9212	7.82134	9.11513	8.78616	17.6694	8.60608	8.34777	15.2072	10.0576	0.661374	-0.596461	0.0187914	1.62198	down	--	--	--	--	--	--	HMDB0029075	--	Organic compounds	Organic acids and derivatives	Carboxylic acids and derivatives	--	Animals
pos_3385	Biopterin	2668.7	4078.82	4535.22	3961.6	3890	3838.51	4300.04	4582.38	5533.29	5366.84	4879.22	4637.41	3828.81	4883.19	1.27538	0.35093	0.00881575	1.64494	up	C06313	--	--	--	--	--	HMDB0000468	22150-76-1	Organic compounds	Organoheterocyclic compounds	Pteridines and derivatives	--	Animals
pos_3408	(5E,8E,11E)-13-[(2S,3S)-3-Pentylthiiran-2-yl]trideca-5,8,11-trienoic acid	9.41325	8.1037	14.6552	8.58429	11.5052	16.539	19.1986	26.2405	22.4395	22.0085	17.7383	17.8252	11.4668	20.9084	1.82339	0.866627	0.000686347	1.9684	up	--	--	--	--	--	--	HMDB0244591	--	Organic compounds	Lipids and lipid-like molecules	Fatty Acyls	--	Animals
pos_3473	Chrycorin	1211.93	1893.07	2257.42	1968.66	1894.66	1609.17	2118.57	2317.16	2613.97	2188.1	2271.96	2094.13	1805.82	2267.31	1.25556	0.32833	0.0245322	1.51439	up	--	--	--	--	--	--	HMDB0035149	91362-90-2	Organic compounds	Organoheterocyclic compounds	Oxanes	--	Animals,Plants
pos_3548	alpha-oxycodol	87.0986	111.864	133.725	125.738	120.044	128.244	179.247	184.953	183.991	172.528	162.522	145.533	117.786	171.462	1.45572	0.541728	0.000177564	2.07394	up	--	--	--	--	--	--	HMDB0061077	--	Organic compounds	Benzenoids	Phenanthrenes and derivatives	--	Animals
pos_3552	Trelanserin	423.341	493.808	470.207	456.437	446.608	458.309	353.447	341.523	349.4	327.878	309.507	317.903	458.118	333.276	0.72749	-0.459001	2.03e-06	2.20725	down	--	--	--	--	--	--	HMDB0259118	--	Organic compounds	Organoheterocyclic compounds	Diazinanes	--	Animals
pos_3554	L-Fucose	638.552	542.48	511.035	489.632	483.177	481.788	414.312	450.067	449.031	437.029	409.646	390.968	524.444	425.175	0.810716	-0.302731	0.00823281	1.77033	down	C01019	--	--	--	--	--	HMDB0000174	6696-41-9	Organic compounds	Organic oxygen compounds	Organooxygen compounds	--	Animals
pos_3561	5-(4-Acetamidophenyl)pyrazin-2(1H)-one	25.8349	216.596	165.405	154.816	156.67	151.522	169.968	220.02	223.305	263.137	213.941	214.305	145.141	217.446	1.49818	0.583207	0.0385472	1.43248	up	--	--	--	--	--	--	HMDB0258324	--	Organic compounds	Benzenoids	Benzene and substituted derivatives	--	Animals
pos_3568	Benzyl alcohol beta-D-rutinoside	26.054	38.3507	31.4214	32.183	29.0361	33.7246	24.9963	18.0492	24.3263	24.0821	27.1202	21.4324	31.795	23.3344	0.733902	-0.446341	0.00314398	1.80553	down	--	--	--	--	--	--	HMDB0303057	--	Organic compounds	Organic oxygen compounds	Organooxygen compounds	--	Animals
pos_3571	(1S,2R)-1-C-(indol-3-yl)glycerol 3-phosphate	269.561	399.963	285.652	260.407	270.862	255.727	194.719	208.811	208.025	164.643	179.599	179.747	290.362	189.257	0.651798	-0.617502	0.00497491	1.86879	down	C03506	Phenylalanine, tyrosine and tryptophan biosynthesis(ko00400);;Benzoxazinoid biosynthesis(ko00402);;Indole diterpene alkaloid biosynthesis(ko00403);;Biosynthesis of alkaloids derived from shikimate pathway(ko01063);;Metabolic pathways(ko01100);;Biosynthesis of secondary metabolites(ko01110);;Biosynthesis of amino acids(ko01230)	--	--	--	--	HMDB0303952	--	Organic compounds	Organoheterocyclic compounds	Indoles and derivatives	--	Microbe,Animals
pos_3572	3'-O-Methylguanosine	72.1089	79.3621	93.3652	79.3296	91.0633	75.8499	3.54449	3.31322	7.92e-08	3.07207	5.04297	5.68161	81.8465	3.44239	0.0420592	-4.57144	1.31e-06	2.31027	down	--	--	--	--	--	--	HMDB0006038	10300-27-3	Organic compounds	Nucleosides, nucleotides, and analogues	Purine nucleosides	--	Animals
pos_3576	Trp Met Glu	206.721	184.696	165.429	157.805	153.92	164.865	129.022	131.096	120.627	122.985	109.128	114.435	172.239	121.216	0.703763	-0.506838	0.000787264	2.02131	down	--	--	--	--	--	--	--	--	--	--	--	--	--
pos_3584	Albanin D	67.2573	89.1174	76.955	81.9183	83.9192	81.9393	74.9251	69.1969	72.8529	70.6012	58.3656	58.7714	80.1844	67.4522	0.841213	-0.249457	0.0129201	1.53661	down	--	--	--	--	--	--	HMDB0038876	134955-26-3	Organic compounds	Phenylpropanoids and polyketides	Flavonoids	--	Animals
pos_3640	S-Methyl benzenecarbothioate	323.627	428.826	392.355	414.087	396.866	389.195	16.4081	13.6184	14.4342	16.5144	13.7478	13.6007	390.826	14.7206	0.0376654	-4.73062	1.7e-06	2.30576	down	--	--	--	--	--	--	HMDB0029694	5925-68-8	Organic compounds	Benzenoids	Benzene and substituted derivatives	--	Microbe,Animals
pos_3645	Cys Asn Ser Arg	105.573	141.338	127.045	131.569	147.31	130.292	111.797	104.189	97.9158	99.2841	91.7205	103.827	130.521	101.455	0.777312	-0.363435	0.00275537	1.87269	down	--	--	--	--	--	--	--	--	--	--	--	--	--
pos_3675	Pipazethate	474.668	588.398	566.989	514.668	522.676	511.452	108.844	105.577	153.549	179.844	133.643	105.874	529.809	131.221	0.247677	-2.01347	1.01e-08	2.29912	down	--	--	--	--	--	--	HMDB0015686	2167-85-3	Organic compounds	Organosulfur compounds	Thioethers	--	Animals
pos_3677	Suspensolide F	110.842	164.126	138.917	130.215	126.174	119.716	91.3926	90.8065	106.615	90.8251	93.9739	95.0758	131.665	94.7815	0.719868	-0.474196	0.00346527	1.93696	down	--	--	--	--	--	--	HMDB0031918	64703-86-2	Organic compounds	Lipids and lipid-like molecules	Prenol lipids	--	Animals
pos_3728	Shoyuflavone B	75.9556	122.651	97.2554	85.7158	97.7849	85.5395	8.02e-08	7.89e-08	7.92e-08	7.21e-08	7.12e-08	6.76e-08	94.1504	7.49e-08	7.95e-10	-30.2282	3.08e-05	2.27249	down	--	--	--	--	--	--	HMDB0034589	190712-88-0	Organic compounds	Phenylpropanoids and polyketides	Isoflavonoids	--	Animals
pos_3763	(E)-2-octenal	54.504	75.4105	59.8673	60.9947	58.6908	56.8766	8.02e-08	7.89e-08	7.92e-08	7.21e-08	7.12e-08	6.76e-08	61.0573	7.49e-08	1.23e-09	-29.6034	5.47e-06	2.29735	down	--	--	--	--	--	--	HMDB0013809	2548-87-0	Organic compounds	Organic oxygen compounds	Organooxygen compounds	--	Animals
pos_3773	3-Benzyl-5-(6-carboxyhexyl)-1-(2-cyclohexyl-2-hydroxyethylamino)hydantoin	25.0681	43.1468	44.6175	28.3636	35.679	34.7456	37.0583	55.1014	60.2847	71.4488	62.039	45.4994	35.2701	55.2386	1.56616	0.647232	0.00925326	1.65521	up	--	--	--	--	--	--	HMDB0249489	--	Organic compounds	Organoheterocyclic compounds	Azolidines	--	Animals
pos_3774	(2S)-N-[(2S)-1-[Acetyl-[(2S)-1-oxohexan-2-yl]amino]-4-methyl-1-oxopentan-2-yl]-2-amino-4-methylpentanamide	11.689	13.8419	19.1674	22.7219	18.1164	18.695	26.7688	24.4095	23.9738	24.3857	26.2949	22.7651	17.3719	24.7663	1.42565	0.511619	0.00457159	1.88551	up	--	--	--	--	--	--	HMDB0257703	--	Organic compounds	Organic acids and derivatives	Carboxylic acids and derivatives	--	Animals
pos_3792	1-Amino-2-methylanthraquinone	3790.76	6185.89	6873.54	6064.29	6053.55	6015.92	6218.48	7071.02	8693.24	8677.78	7834.47	7529.77	5830.66	7670.79	1.3156	0.395717	0.0100381	1.60404	up	C19320	--	--	--	--	--	HMDB0243816	--	Organic compounds	Benzenoids	Anthracenes	--	Animals
pos_3801	Palmitoylglycine	25.1054	40.8652	44.1456	32.8324	40.0105	39.19	56.6939	58.4403	55.7638	60.6363	63.5264	46.6796	37.0248	56.9567	1.53834	0.621372	0.000324148	2.01666	up	--	--	LMFA08020079	Fatty Acyls [FA]	Fatty amides [FA08]	N-acyl amines [FA0802]	HMDB0013034	158305-64-7	Organic compounds	Organic acids and derivatives	Carboxylic acids and derivatives	--	Animals
pos_3811	(5E)-5-[(3Ar,4S,5S,6aR)-5-hydroxy-4-[(E,3R)-3-hydroxyoct-1-enyl]-3,3a,4,5,6,6a-hexahydro-1H-pentalen-2-ylidene]pentanoic acid	9.2582	20.0904	14.4463	16.5372	23.9707	22.802	99.5689	96.7417	104.312	89.4896	80.0521	90.0236	17.8508	93.3647	5.23028	2.38689	4.38e-08	2.30495	up	--	--	--	--	--	--	HMDB0247207	--	Organic compounds	Lipids and lipid-like molecules	Fatty Acyls	--	Animals
pos_3814	Dexamethasone isonicotinate	50.4646	67.3151	65.9745	73.4744	66.8105	67.1461	78.8232	86.8725	111.131	118.953	95.3556	88.1151	65.1975	96.5417	1.48076	0.566335	0.00266158	1.87833	up	--	--	--	--	--	--	--	--	--	--	--	--	--
pos_3873	Isopentenyladenine-9-N-glucoside	5.4294	14.6315	30.9572	20.592	28.0911	25.2928	22.5449	23.9644	38.5959	59.0213	39.3053	35.0088	20.8323	36.4068	1.74761	0.805382	0.0435054	1.3363	up	--	--	--	--	--	--	HMDB0012240	83087-94-9	Organic compounds	Organic oxygen compounds	Organooxygen compounds	--	Animals
pos_3909	16,17-Dihydro-16alpha,17-dihydroxygibberellin A4 17-glucoside	100.264	186.159	95.6254	75.365	118.906	96.5149	67.8243	67.8551	68.9969	52.0577	54.1794	74.6674	112.139	64.2635	0.573069	-0.803218	0.0284386	1.58085	down	--	--	--	--	--	--	HMDB0040647	159858-83-0	Organic compounds	Lipids and lipid-like molecules	Prenol lipids	--	Animals
pos_3911	VIBEGRON	144.403	163.99	123.722	141.026	145.791	148.546	71.273	66.6285	81.8766	70.6772	64.1843	77.9149	144.58	72.0924	0.498634	-1.00395	3.36e-06	2.24019	down	--	--	--	--	--	--	HMDB0259801	--	Organic compounds	Benzenoids	Benzene and substituted derivatives	--	Animals
pos_3913	Asp Asp Thr Thr	352.026	353.12	434.454	424.329	440.334	438.619	792.391	728.863	697.554	708.482	671.61	458.497	407.147	676.233	1.66091	0.73197	0.00136343	2.06379	up	--	--	--	--	--	--	--	--	--	--	--	--	--
pos_3919	Ribosylzeatin phosphate	89.701	64.9805	84.9786	66.114	75.0204	72.0622	93.1156	96.0818	149.985	145.414	127.738	105.327	75.4761	119.61	1.58474	0.664249	0.00576658	1.79398	up	--	--	--	--	--	--	HMDB0034811	25615-16-1	Organic compounds	Nucleosides, nucleotides, and analogues	Purine nucleotides	--	Animals
pos_3920	Thiacetazone	17.5774	60.9182	63.3611	48.4883	51.3687	57.7983	50.7184	67.0631	103.332	112.78	86.1529	77.058	49.9187	82.8507	1.65971	0.730933	0.0193107	1.51085	up	--	--	--	--	--	--	--	--	--	--	--	--	--
pos_3923	1-O-Sinapoylglucose	73.435	105.04	78.2302	85.7629	74.089	78.677	8.02e-08	7.89e-08	7.92e-08	7.21e-08	7.12e-08	6.76e-08	82.5391	7.49e-08	9.07e-10	-30.0383	1.28e-05	2.28422	down	--	--	--	--	--	--	HMDB0041175	--	Organic compounds	Phenylpropanoids and polyketides	Cinnamic acids and derivatives	--	Animals
pos_3977	Methoxybrassenin B	83.3937	111.976	133.005	105.048	118.268	127.961	75.785	106.645	93.4465	109.55	86.6235	71.9027	113.275	90.6589	0.800342	-0.321312	0.0417647	1.37689	down	--	--	--	--	--	--	HMDB0038636	142449-75-0	Organic compounds	Organoheterocyclic compounds	Indoles and derivatives	--	Animals,Plants,Microbe
pos_3990	N-(1-Deoxy-b-D-fructopyranosyl) (R)C(S)S-alliin	174.995	226.777	227.46	226.853	225.149	220.528	173.892	167.102	158.504	147.317	147.002	130.645	216.96	154.077	0.710162	-0.49378	0.000192776	2.016	down	--	--	--	--	--	--	HMDB0040829	149340-22-7	Organic compounds	Organic acids and derivatives	Carboxylic acids and derivatives	--	Animals
pos_3992	Biotripyrrin-a	33.7994	37.8222	39.7002	34.2724	37.781	33.0032	18.7857	9.57791	22.0545	19.925	16.4183	12.7119	36.063	16.5789	0.45972	-1.12117	2.15e-05	2.19033	down	--	--	--	--	--	--	HMDB0003323	158649-79-7	Organic compounds	Organoheterocyclic compounds	Pyrroles	--	Animals
pos_3993	Gibberellin A1 glucosyl ester	113.437	95.806	58.3964	44.2885	64.6162	48.2337	27.9121	24.2241	21.7689	26.6967	26.8773	38.0939	70.7963	27.5955	0.389787	-1.35924	0.0116499	1.79235	down	--	--	--	--	--	--	HMDB0038609	54788-51-1	Organic compounds	Lipids and lipid-like molecules	Prenol lipids	--	Animals
pos_4017	Cinncassiol A 19-glucoside	48.3645	80.6694	70.3989	60.1548	57.4845	71.428	101.336	93.4343	88.1806	98.6319	92.8622	99.328	64.75	95.6288	1.47689	0.562564	0.000616638	2.05882	up	--	--	--	--	--	--	HMDB0035165	73599-12-9	Organic compounds	Lipids and lipid-like molecules	Prenol lipids	--	Animals
pos_403	3-Methyl-5-pentyl-1,2,4-trithiolane	24.5123	36.8325	33.1999	28.9654	23.6726	32.9147	24.5884	26.8147	24.2649	24.1874	23.4434	21.5619	30.0162	24.1435	0.804347	-0.31411	0.0394732	1.46117	down	--	--	--	--	--	--	HMDB0040242	101517-93-5	Organic compounds	Organoheterocyclic compounds	Trithiolanes	--	Animals
pos_4039	Apstatin	68.0013	104.086	86.6368	89.7293	67.0726	82.9397	107.139	101.532	106.198	89.3381	93.8434	99.7053	83.0777	99.6258	1.19919	0.262059	0.0345376	1.4933	up	--	--	--	--	--	--	HMDB0248539	--	Organic compounds	Organic acids and derivatives	Peptidomimetics	--	Animals
pos_4054	MG(a-13:0/0:0/0:0)[rac]	8.45867	16.1442	16.1069	11.3537	19.3885	14.8641	25.0107	24.9698	21.6753	16.646	23.4106	18.2087	14.386	21.6535	1.50518	0.589934	0.00698455	1.73623	up	--	--	--	--	--	--	HMDB0072841	--	Organic compounds	Lipids and lipid-like molecules	Glycerolipids	--	Animals
pos_4070	Cichorioside D	39.3692	45.9471	35.8059	34.7069	39.2332	34.0411	38.3409	48.3592	49.68	47.3044	49.2462	44.5176	38.1839	46.2414	1.21102	0.27622	0.00941275	1.62254	up	--	--	--	--	--	--	HMDB0302051	--	Organic compounds	Organic oxygen compounds	Organooxygen compounds	--	Animals
pos_4088	N-Linoleoyl Phenylalanine	55.2168	63.6041	81.1129	71.3569	79.4272	76.445	124.314	116.88	117.617	125.49	119.491	124.788	71.1938	121.43	1.70563	0.770303	1.63e-05	2.2347	up	--	--	--	--	--	--	HMDB0241982	--	Organic compounds	Organic acids and derivatives	Carboxylic acids and derivatives	--	Animals
pos_4100	Aflatoxin GM1	316.74	331.033	341.72	322.848	293.863	311.716	222.181	238.904	236.707	207.323	196.908	201.11	319.653	217.189	0.679451	-0.557558	1.38e-06	2.21261	down	--	--	--	--	--	--	HMDB0030477	23532-00-5	Organic compounds	Phenylpropanoids and polyketides	Coumarins and derivatives	--	Animals,Microbe
pos_4120	Myricanene B 5-[arabinosyl-(1->6)-glucoside]	15.8363	42.4248	23.5805	29.9176	25.8969	23.3164	8.68921	8.23431	13.2023	12.6574	7.12e-08	11.3742	26.8288	9.02624	0.336439	-1.57158	0.00285149	1.86686	down	--	--	--	--	--	--	--	--	--	--	--	--	--
pos_4127	2-Amino-N-[1-[[2-[[1-(2-hydroxyethylamino)-1-oxo-3-phenylpropan-2-yl]-methylamino]-2-oxoethyl]amino]-1-oxopropan-2-yl]-3-(4-hydroxyphenyl)propanamide	45.7595	71.1686	54.4225	53.5084	58.2568	62.397	77.5165	75.6474	77.0427	66.9418	64.6635	73.534	57.5855	72.5576	1.26	0.333423	0.00655315	1.78164	up	--	--	--	--	--	--	HMDB0247859	--	Organic compounds	Organic acids and derivatives	Carboxylic acids and derivatives	--	Animals
pos_4138	Nevanimibe	290.596	425.885	380.274	388.553	357.045	382.243	356.7	291.578	264.902	144.483	184.238	170.635	370.766	235.423	0.634963	-0.655256	0.00807292	1.66391	down	--	--	--	--	--	--	HMDB0255573	--	Organic compounds	Benzenoids	Benzene and substituted derivatives	--	Animals
pos_4145	Prostaglandin lactone-diol	57.5093	88.9966	96.3983	71.0178	76.3392	80.9819	86.3044	53.0689	46.5436	23.8152	25.4376	25.2549	78.5405	43.4041	0.552633	-0.855605	0.0155563	1.55777	down	--	--	--	--	--	--	HMDB0240213	26054-67-1	Organic compounds	Lipids and lipid-like molecules	Fatty Acyls	--	Animals
pos_4154	Sonchuionoside C	467.872	514.713	394.029	370.065	467.122	424.14	940.082	711.317	619.372	536.916	538.437	476.367	439.657	637.082	1.44904	0.535101	0.0345031	1.61061	up	--	--	--	--	--	--	HMDB0035212	126585-76-0	Organic compounds	Lipids and lipid-like molecules	Prenol lipids	--	Animals
pos_4155	Asp Arg Arg	110.305	156.145	111.271	108.394	122.237	132.194	251.612	190.682	148.585	166.003	139.346	129.766	123.424	170.999	1.38546	0.470362	0.0495641	1.50404	up	--	--	--	--	--	--	--	--	--	--	--	--	--
pos_4189	3-O-Acetylepisamarcandin	1170.81	1105.94	1065.58	1093.19	1056.8	1082.48	1371.6	1410.48	1422.48	1245.56	1213.15	1085.75	1095.8	1291.5	1.1786	0.237068	0.0139016	1.78579	up	--	--	--	--	--	--	HMDB0031958	61490-18-4	Organic compounds	Phenylpropanoids and polyketides	Coumarins and derivatives	--	Animals
pos_4192	PS(PGF1alpha/18:3(6Z,9Z,12Z))	8.88207	5.69886	33.3126	42.2819	30.5917	20.3196	73.9557	71.3542	86.1624	71.4041	57.7457	22.0751	23.5145	63.7829	2.7125	1.43962	0.00530398	1.8165	up	--	--	--	--	--	--	HMDB0281831	--	_	_	_	--	Animals
pos_4195	o-Xylene	31.9839	46.3819	44.5387	37.7935	34.3696	31.4526	53.5163	54.3636	46.6235	46.3458	43.1339	36.1718	37.7534	46.6925	1.23678	0.306586	0.0406618	1.43046	up	C07212	Xylene degradation(ko00622);;Metabolic pathways(ko01100);;Microbial metabolism in diverse environments(ko01120);;Degradation of aromatic compounds(ko01220)	--	--	--	--	HMDB0059851	95-47-6	Organic compounds	Benzenoids	Benzene and substituted derivatives	--	Animals,Plants
pos_4197	(4-Methylphenyl)acetaldehyde	148.858	180.957	146.907	121.674	134.119	132.454	185.985	200.042	188.957	177.85	152.326	145.792	144.161	175.159	1.21502	0.280979	0.0290723	1.50726	up	--	--	--	--	--	--	HMDB0029639	104-09-6	Organic compounds	Benzenoids	Benzene and substituted derivatives	--	Animals
pos_4201	8-Deoxy-11,13-dihydroxygrosheimin	124.883	139.539	112.271	111.808	115.22	114.754	147.159	158.916	146.28	142.816	125.278	123.249	119.746	140.616	1.17429	0.231788	0.0162293	1.64053	up	--	--	--	--	--	--	HMDB0041144	83551-03-5	Organic compounds	Lipids and lipid-like molecules	Prenol lipids	--	Animals,Plants
pos_4202	Glucosylxanthone	25.7018	23.7991	7.90101	6.2613	4.48741	17.882	30.692	43.4729	28.6467	38.1623	24.8719	21.3283	14.3388	31.1957	2.17562	1.12143	0.00803078	1.72637	up	--	--	--	--	--	--	HMDB0252794	--	Organic compounds	Organoheterocyclic compounds	Benzopyrans	--	Animals
pos_4204	Armillarin	28704.1	36397.6	28112	25727.5	27204.8	26810.3	37192	38436.1	35739.3	34797.6	30060.1	28711.5	28826	34156.1	1.1849	0.244771	0.0389102	1.45829	up	--	--	--	--	--	--	--	--	--	--	--	--	--
pos_4208	Clobetasone butyrate	90.065	98.8626	45.3098	52.3289	64.1824	66.8528	90.2799	104.646	85.1684	132.472	100.384	83.5908	69.6003	99.4234	1.42849	0.514493	0.0255574	1.50627	up	--	--	--	--	--	--	HMDB0250333	--	Organic compounds	Lipids and lipid-like molecules	Steroids and steroid derivatives	--	Animals
pos_4209	LysoPS(18:2(9Z,12Z)/0:0)	62.0243	80.9801	88.3854	87.3546	89.5921	73.3788	87.888	101.792	109.395	94.2075	96.9853	81.3785	80.2859	95.2744	1.18669	0.246942	0.0315413	1.44364	up	--	--	LMGP03050011	Glycerophospholipids [GP]	Glycerophosphoserines [GP03]	Monoacylglycerophosphoserines [GP0305]	HMDB0240604	1218913-82-6	Organic compounds	Lipids and lipid-like molecules	Glycerophospholipids	--	Animals
pos_4213	MURABUTIDE	213.594	231.408	197.552	186.233	217.872	180.46	262.048	265.417	268.14	285.498	231.401	220.864	204.52	255.561	1.24957	0.321426	0.00282013	1.85269	up	--	--	--	--	--	--	HMDB0254948	--	Organic compounds	Organic acids and derivatives	Carboxylic acids and derivatives	--	Animals
pos_4230	Pregnanetriol	131.605	134.685	203.679	216.551	193.484	195.6	78.8051	62.6912	76.9346	67.964	64.5067	41.8565	179.268	65.4597	0.365151	-1.45344	0.000304053	2.11271	down	--	--	--	--	--	--	HMDB0256756	27178-64-9	Organic compounds	Lipids and lipid-like molecules	Steroids and steroid derivatives	--	Animals
pos_4231	1-(4Z,7Z,10Z,13Z,16Z,19Z-docosahexaenoyl)-glycero-3-phosphate	561.909	556.038	913.89	894.173	862.438	877.403	327.392	321.9	353.267	309.592	298.743	223.928	777.642	305.804	0.393245	-1.3465	0.000748802	2.08597	down	--	--	LMGP10050019	Glycerophospholipids [GP]	Glycerophosphates [GP10]	Monoacylglycerophosphates [GP1005]	--	--	--	--	--	--	--
pos_4232	N,N-Dimethylethanolamine N-oxide	453.633	522.444	451.184	437.494	408.07	403.229	15.7777	8.59686	12.0915	20.5669	12.7654	9.26767	446.009	13.1777	0.0295458	-5.0809	1.71e-06	2.30841	down	--	--	--	--	--	--	--	--	--	--	--	--	--
pos_4252	Cibenzoline	69.357	48.9853	84.4007	88.2356	89.1373	104.004	11.918	13.3093	13.732	20.5209	14.2581	12.7442	80.6867	14.4138	0.178638	-2.48489	0.000304017	2.16824	down	--	--	--	--	--	--	HMDB0250229	--	Organic compounds	Benzenoids	Benzene and substituted derivatives	--	Animals
pos_4256	LysoPE(16:1(9Z)/0:0)	216.471	185.951	341.206	344.316	327.763	348.347	545.581	544.906	576.035	576.145	540.476	368.033	294.009	525.196	1.78633	0.836995	0.000363222	2.02783	up	--	--	LMGP02050010	Glycerophospholipids [GP]	Glycerophosphoethanolamines [GP02]	Monoacylglycerophosphoethanolamines [GP0205]	HMDB0011504	--	Organic compounds	Lipids and lipid-like molecules	Glycerophospholipids	--	Microbe,Animals
pos_4258	D-1-[(3-Carboxypropyl)amino]-1-deoxyfructose	31.5491	47.2069	41.1656	32.3591	32.2367	46.3722	48.9903	47.7998	61.2659	56.0352	41.3342	49.359	38.4816	50.7974	1.32004	0.400586	0.0137609	1.60921	up	--	--	--	--	--	--	HMDB0038663	10003-63-1	Organic compounds	Organic acids and derivatives	Carboxylic acids and derivatives	--	Animals
pos_4276	11-beta-Hydroxyandrosterone-3-glucuronide	64.364	125.604	87.1966	95.788	93.4932	92.9972	25.9087	21.4657	31.6465	32.9561	21.3397	19.0444	93.2405	25.3935	0.272344	-1.8765	0.000209057	2.15662	down	C05643	--	LMST05010055	Sterol Lipids [ST]	Steroid conjugates [ST05]	Glucuronides [ST0501]	HMDB0010351	--	Organic compounds	Organoheterocyclic compounds	Indoles and derivatives	--	Animals
pos_4335	fluticasone	234.272	222.13	322.065	321.151	330.325	328.07	224.236	233.81	233.591	258.076	223.391	147.393	293.002	220.083	0.75113	-0.412865	0.0190529	1.51415	down	--	--	--	--	--	--	HMDB0252416	--	Organic compounds	Lipids and lipid-like molecules	Steroids and steroid derivatives	--	Animals
pos_4343	N-Stearoyl Alanine	10.4297	37.2514	23.092	27.3361	23.6175	33.3344	101.613	90.4376	103.266	93.9003	91.7705	100.073	25.8435	96.8435	3.7473	1.90585	2.12e-07	2.28733	up	--	--	--	--	--	--	HMDB0241936	--	Organic compounds	Organic acids and derivatives	Carboxylic acids and derivatives	--	Animals
pos_4348	MG(20:3(8Z,11Z,14Z)-O(5,6)/0:0/0:0)	20.456	31.195	23.5228	27.0484	27.3239	27.6402	43.1333	43.3549	50.7046	43.8474	44.7724	37.8972	26.1977	43.9516	1.67769	0.746477	1.46e-05	2.17902	up	--	--	--	--	--	--	HMDB0260464	--	_	_	_	--	Animals
pos_4352	25-Hydroxyvitamin D3-26,23-lactone	52.7261	32.795	125.282	122.047	116.451	127.924	196.157	193.813	203.209	217.307	188.553	100.802	96.204	183.307	1.9054	0.930091	0.00479974	1.78876	up	--	--	--	--	--	--	HMDB0060126	--	Organic compounds	Lipids and lipid-like molecules	Steroids and steroid derivatives	--	Animals
pos_436	Biotin sulfoxide	607.908	842.22	718.024	675.4	696.884	705.292	862.128	815.334	812.958	854.967	826.424	859.946	707.621	838.626	1.18513	0.24505	0.00728224	1.82348	up	--	--	--	--	--	--	--	--	--	--	--	--	--
pos_438	Pteroic acid	56.3425	65.9678	61.8704	55.5004	65.5454	60.0142	63.9372	66.9278	69.9297	70.2496	66.8003	73.7203	60.8734	68.5942	1.12683	0.172273	0.00777672	1.6435	up	C07582	--	--	--	--	--	HMDB0256914	119-24-4	Organic compounds	Organoheterocyclic compounds	Pteridines and derivatives	--	Animals
pos_4387	CDP-DG(a-15:0/PGJ2)	3.90845	8.06e-08	40.1721	29.284	23.9273	30.9305	71.2884	57.6325	70.2443	61.4553	58.4192	28.7727	21.3704	57.9687	2.71257	1.43966	0.00238756	1.86721	up	--	--	--	--	--	--	HMDB0292875	--	_	_	_	--	Animals
pos_4389	Retinol / Retinol skeleton	41.7734	35.2353	87.2176	77.7468	69.5453	72.654	106.131	99.1583	95.9793	99.2272	91.1217	69.3308	64.0287	93.4915	1.46015	0.546115	0.0174096	1.62119	up	--	--	--	--	--	--	--	--	--	--	--	--	--
pos_439	SAICAR	91.5525	117.966	113.328	112.787	115.225	113.824	133.338	126.088	122.43	131.682	122.21	122.48	110.78	126.371	1.14074	0.189965	0.00855447	1.76238	up	C04823	Purine metabolism(ko00230);;Metabolic pathways(ko01100);;Biosynthesis of secondary metabolites(ko01110)	--	--	--	--	HMDB0000797	3031-95-6	Organic compounds	Nucleosides, nucleotides, and analogues	Imidazole ribonucleosides and ribonucleotides	--	Microbe,Animals
pos_4392	O-Arachidonoyl Glycidol	3346.34	3134.49	5285.81	5134.11	4747.87	5006.18	6681.61	6401.69	6632.67	6319.9	5923.73	4238.65	4442.46	6033.04	1.35804	0.441525	0.0146417	1.63647	up	--	--	--	--	--	--	--	--	--	--	--	--	--
pos_4393	LysoPE(20:4(8Z,11Z,14Z,17Z)/0:0)	16513.1	16243.7	26594.5	26041.2	25128.8	25783.1	32982.3	32718.3	33932.3	32491.1	30507.9	22112.5	22717.4	30790.7	1.35538	0.438698	0.0137062	1.64515	up	--	--	LMGP02050067	Glycerophospholipids [GP]	Glycerophosphoethanolamines [GP02]	Monoacylglycerophosphoethanolamines [GP0205]	HMDB0011518	--	Organic compounds	Lipids and lipid-like molecules	Glycerophospholipids	--	Animals
pos_4399	3D,7D,11D-Phytanic acid	20796.2	26049.6	25007.5	23071.8	23185.8	21636.7	30954.5	32231.2	30697.4	29973.7	27752.5	24962.4	23291.3	29428.6	1.2635	0.33743	0.00127214	1.94728	up	--	--	LMPR0104010036	Prenol Lipids [PR]	Isoprenoids [PR01]	C20 isoprenoids (diterpenes) [PR0104]	HMDB0000417	18654-64-3	Organic compounds	Lipids and lipid-like molecules	Prenol lipids	--	Animals
pos_4454	Solanocardinol	61.5533	89.2866	96.1593	111.846	94.6993	85.3294	222.613	190.861	194.854	165.679	175.116	191.106	89.8123	190.038	2.11595	1.0813	2.81e-06	2.2253	up	--	--	--	--	--	--	HMDB0038836	138665-46-0	Organic compounds	Lipids and lipid-like molecules	Steroids and steroid derivatives	--	Animals
pos_4480	PC(18:2(2E,4E)/0:0)	230.537	283.515	177.208	195.814	106.236	122.755	161.007	106.694	102.784	57.1893	78.7673	43.9861	186.011	91.7379	0.493185	-1.0198	0.0176097	1.54752	down	--	--	LMGP01050034	Glycerophospholipids [GP]	Glycerophosphocholines [GP01]	Monoacylglycerophosphocholines [GP0105]	--	--	--	--	--	--	--
pos_4481	LysoPE(22:5(4Z,7Z,10Z,13Z,16Z)/0:0)	58.3835	85.3495	62.9537	75.7426	66.1855	62.6021	79.1927	72.279	90.6565	86.9177	74.6022	78.5249	68.5362	80.3622	1.17255	0.229651	0.0436062	1.39027	up	--	--	LMGP02050069	Glycerophospholipids [GP]	Glycerophosphoethanolamines [GP02]	Monoacylglycerophosphoethanolamines [GP0205]	HMDB0011524	--	Organic compounds	Lipids and lipid-like molecules	Glycerophospholipids	--	Animals
pos_4483	(Z)-1,3-Octadiene	146.704	188.871	173.271	174.797	174.114	167.976	7.03489	1.37877	3.45008	4.71534	4.37258	3.6383	170.956	4.09833	0.023973	-5.38244	5.76e-07	2.3109	down	--	--	--	--	--	--	HMDB0061897	--	Organic compounds	Hydrocarbons	Unsaturated hydrocarbons	--	Animals
pos_4484	Docosapentaenoic acid (22n-3)	591.442	765.015	712.733	722.555	693.217	726.256	4.96012	8.88958	4.08952	1.77278	2.7136	2.32461	701.87	4.12504	0.00587721	-7.41065	8.84e-07	2.30921	down	C16513	Biosynthesis of unsaturated fatty acids(ko01040)	LMFA04000044	Fatty Acyls [FA]	Docosanoids [FA04]	Other Docosanoids [FA0400]	HMDB0006528	24880-45-3	Organic compounds	Lipids and lipid-like molecules	Fatty Acyls	--	Animals
pos_4490	11'-Carboxy-gamma-chromanol	1736.27	1499.72	2481.63	2406.69	2289.65	2354.05	1487.76	1389.3	1417.83	1330.36	1290.61	886.3	2128	1300.36	0.61107	-0.71059	0.00258428	1.86212	down	--	--	--	--	--	--	HMDB0012517	--	Organic compounds	Lipids and lipid-like molecules	Prenol lipids	--	Animals
pos_4493	LysoPE(22:5(7Z,10Z,13Z,16Z,19Z)/0:0)	7997.26	8182.81	12569.4	12520.4	12168.4	12615.5	7371.88	7124.11	7477.34	7336.3	6892.54	5018.9	11009	6870.18	0.624053	-0.68026	0.00490154	1.82299	down	--	--	LMGP02050070	Glycerophospholipids [GP]	Glycerophosphoethanolamines [GP02]	Monoacylglycerophosphoethanolamines [GP0205]	HMDB0011525	--	Organic compounds	Lipids and lipid-like molecules	Glycerophospholipids	--	Animals
pos_4509	PE(16:0/0:0)	1094.44	1137.3	1876.39	1865.46	1769.29	1951.99	2459.05	2424.06	2618.27	2413.33	2320.18	1670.09	1615.81	2317.5	1.43426	0.520309	0.0076676	1.73566	up	--	--	LMGP02050002	Glycerophospholipids [GP]	Glycerophosphoethanolamines [GP02]	Monoacylglycerophosphoethanolamines [GP0205]	HMDB0011503	53862-35-4	Organic compounds	Lipids and lipid-like molecules	Glycerophospholipids	--	Microbe,Animals
pos_4527	LysoPE(0:0/18:0)	395.753	394.99	663.969	723.36	648.258	688.257	913.053	910.204	950.484	886.805	869.346	598.766	585.765	854.776	1.45925	0.545226	0.00770005	1.7362	up	--	--	LMGP02050038	Glycerophospholipids [GP]	Glycerophosphoethanolamines [GP02]	Monoacylglycerophosphoethanolamines [GP0205]	HMDB0011129	899443-67-5	Organic compounds	Lipids and lipid-like molecules	Glycerophospholipids	--	Animals
pos_4585	4-Hydroxy-3-(16-methylheptadecyl)-2H-pyran-2-one	83.4641	110.237	154.774	152.807	127.28	160.255	225.419	214.665	215.017	209.034	191.095	126.939	131.469	197.028	1.49866	0.583674	0.00702428	1.76472	up	--	--	--	--	--	--	HMDB0032093	203300-23-6	Organic compounds	Organoheterocyclic compounds	Pyrans	--	Animals
pos_4619	Polyoxyethylene (600) monoricinoleate	207.25	199.887	342.636	336.882	298.483	312.746	457.797	439.129	445.16	422.283	390.073	298.825	282.981	408.878	1.4449	0.530966	0.00522383	1.78501	up	--	--	--	--	--	--	HMDB0032476	9004-97-1	Organic compounds	Lipids and lipid-like molecules	Fatty Acyls	--	Animals
pos_4620	PE(18:1(9Z)/0:0)	2653.25	2523.05	4274.93	4277.45	4054.32	4235.84	5687.52	5590.8	5874.56	5776.93	5395.22	3828.17	3669.81	5358.87	1.46026	0.546224	0.0046858	1.79461	up	--	--	LMGP02050004	Glycerophospholipids [GP]	Glycerophosphoethanolamines [GP02]	Monoacylglycerophosphoethanolamines [GP0205]	HMDB0011506	89576-29-4	Organic compounds	Lipids and lipid-like molecules	Glycerophospholipids	--	Microbe,Animals
pos_4622	(2-Acetyloxy-3-hydroxypropyl) (E)-octadec-9-enoate	280.816	261.101	469.614	451.381	411.311	431.124	560.761	569.543	567.012	549.945	520.458	381.928	384.224	524.941	1.36624	0.450207	0.0144024	1.63649	up	--	--	--	--	--	--	HMDB0242459	--	Organic compounds	Lipids and lipid-like molecules	Glycerolipids	--	Animals
pos_4624	LysoPE(20:3(5Z,8Z,11Z)/0:0)	1219.58	1178.98	1987.48	2022.2	1884.6	1975.11	2578.95	2531.11	2634.04	2622.07	2496.36	1766.12	1711.32	2438.11	1.42469	0.510648	0.00683	1.74803	up	--	--	LMGP02050066	Glycerophospholipids [GP]	Glycerophosphoethanolamines [GP02]	Monoacylglycerophosphoethanolamines [GP0205]	HMDB0011515	--	Organic compounds	Lipids and lipid-like molecules	Glycerophospholipids	--	Animals
pos_4635	Chenodeoxycholylproline	77.0256	92.5122	70.6705	92.4496	89.6969	93.7003	123.68	103.012	115.895	123.485	116.734	119.83	86.0092	117.106	1.36155	0.445255	0.000134385	2.09059	up	--	--	--	--	--	--	HMDB0242406	--	_	_	_	--	Animals
pos_4637	Pregnanetriol 3a-O-b-D-glucuronide	123.652	108.17	210.718	205.604	202.02	189.991	115.281	119.492	119.669	120.932	112.916	74.0198	173.359	110.385	0.636741	-0.651222	0.0172969	1.62761	down	--	--	--	--	--	--	HMDB0247360	--	Organic compounds	Lipids and lipid-like molecules	Steroids and steroid derivatives	--	Animals
pos_466	Cinnamyl benzoate	933.8	1129.39	1051.55	980.082	1113.43	1077.22	1334.13	1190.81	1205.53	1290.98	1248.51	1280.6	1047.58	1258.43	1.20127	0.26456	0.000381944	2.02413	up	--	--	--	--	--	--	HMDB0029700	50555-04-9	Organic compounds	Benzenoids	Benzene and substituted derivatives	--	Animals
pos_4681	isopropyl unoprostone	1474.98	1467.41	2453.91	2328.9	2237.48	2273.1	2999.87	3012.68	3057.84	2854.28	2708.06	1932.3	2039.3	2760.84	1.35382	0.437034	0.0168288	1.6104	up	--	--	--	--	--	--	HMDB0253677	--	Organic compounds	Lipids and lipid-like molecules	Fatty Acyls	--	Animals
pos_4682	LysoPE(22:4(7Z,10Z,13Z,16Z)/0:0)	8508.97	8066.68	12403.8	12313	12065.8	12152.8	15417.9	15407.8	16277.4	15498.2	14661.6	10862.6	10918.5	14687.6	1.3452	0.427824	0.00842486	1.71615	up	--	--	LMGP02050014	Glycerophospholipids [GP]	Glycerophosphoethanolamines [GP02]	Monoacylglycerophosphoethanolamines [GP0205]	HMDB0011523	--	Organic compounds	Lipids and lipid-like molecules	Glycerophospholipids	--	Animals
pos_4720	24-Hydroxytetracosanoic acid	2848.26	3574.49	3286.13	3018.74	3115.31	2970.39	3720.15	3894.29	3722.27	3651.16	3512.26	3110.81	3135.55	3601.83	1.1487	0.200008	0.0124382	1.65317	up	--	--	LMFA01050213	Fatty Acyls [FA]	Fatty Acids and Conjugates [FA01]	Hydroxy fatty acids [FA0105]	HMDB0302964	--	Organic compounds	Lipids and lipid-like molecules	Fatty Acyls	--	Animals,Plants
pos_4735	LysoPC(22:4(7Z,10Z,13Z,16Z)/0:0)	554.791	327.026	496.513	504.097	472.111	494.526	639.677	637.847	653.96	684.025	628.715	448.734	474.844	615.493	1.2962	0.374289	0.0130568	1.6481	up	C04230	--	LMGP01050124	Glycerophospholipids [GP]	Glycerophosphocholines [GP01]	Monoacylglycerophosphocholines [GP0105]	HMDB0010401	--	Organic compounds	Lipids and lipid-like molecules	Glycerophospholipids	--	Animals
pos_4739	(Z)-11-Eicosen-1-ol	152.553	210.651	184.415	179.981	189.195	168.475	253.802	230.949	230.347	205.052	196.213	200.481	180.878	219.474	1.21338	0.27903	0.0103145	1.701	up	--	--	LMFA05000219	Fatty Acyls [FA]	Fatty alcohols [FA05]	-	HMDB0034933	62442-62-0	Organic compounds	Lipids and lipid-like molecules	Fatty Acyls	--	Animals
pos_4742	PC(18:1(9E)/0:0)[U]	1860.93	2070.57	1825.68	1614.98	1558.58	1642.8	1646.12	1598.47	1666.11	1505	1441.04	1422.2	1762.26	1546.49	0.877562	-0.188427	0.0439037	1.3847	down	--	--	--	--	--	--	--	--	--	--	--	--	--
pos_4764	Dextran-70	41.52	35.2409	25.6912	30.0735	26.3191	31.0589	58.0307	48.8963	39.0441	52.6412	45.4761	30.4289	31.6506	45.7529	1.44556	0.531631	0.0167076	1.67447	up	--	--	--	--	--	--	HMDB0256672	--	Organic compounds	Organic oxygen compounds	Organooxygen compounds	--	Animals
pos_4782	Persenone B	46.7469	64.8941	85.4318	74.4957	70.2758	62.3583	78.5052	81.6987	91.2589	85.1556	74.8317	80.5855	67.3671	82.0059	1.2173	0.283684	0.0398747	1.42195	up	--	--	LMFA05000719	Fatty Acyls [FA]	Fatty alcohols [FA05]	-	--	--	--	--	--	--	--
pos_4784	16-Acetylpriverogenin A	93.2519	92.1779	70.2731	77.6689	72.8287	57.8287	143.975	147.086	165.427	147.922	139.814	207.253	77.3382	158.58	2.05047	1.03595	0.000153012	2.0767	up	--	--	--	--	--	--	HMDB0034529	26339-85-5	Organic compounds	Lipids and lipid-like molecules	Prenol lipids	--	Animals
pos_4786	Neuroprotectin D1	439.893	549.279	531.452	486.744	479.612	491.009	443.354	441.052	467.046	417.572	397.307	444.832	496.331	435.194	0.876821	-0.189645	0.0109067	1.67164	down	--	--	LMFA04040001	Fatty Acyls [FA]	Docosanoids [FA04]	Protectins [FA0404]	HMDB0003689	--	Organic compounds	Lipids and lipid-like molecules	Fatty Acyls	--	Animals
pos_4793	Murrayenol	330.097	388.216	343.675	344.115	325.189	333.503	419.482	421.977	434.98	421.087	415.569	505.988	344.132	436.514	1.26845	0.343064	0.000463987	1.96984	up	--	--	--	--	--	--	HMDB0029345	--	Organic compounds	Organic oxygen compounds	Organooxygen compounds	--	Animals
pos_4794	LysoPC(P-18:0/0:0)	43.0349	77.1019	60.3288	49.0848	51.8472	60.4758	69.0465	79.1249	80.8392	73.8895	74.1075	84.9309	56.9789	76.9897	1.3512	0.434239	0.00725938	1.74289	up	C04230	--	LMGP01070009	Glycerophospholipids [GP]	Glycerophosphocholines [GP01]	1Z-alkenylglycerophosphocholines [GP0107]	HMDB0013122	--	Organic compounds	Lipids and lipid-like molecules	Glycerophospholipids	--	Animals
pos_4805	DG(10:0/18:3(9,11,15)-OH(13)/0:0)	335.812	487.38	386.454	379.018	431.463	390.857	470.798	479.321	490.667	442.196	426.132	463.543	401.831	462.11	1.15001	0.201647	0.0359857	1.49388	up	--	--	--	--	--	--	HMDB0294585	--	_	_	_	--	Animals
pos_4831	1-(11Z-docosenoyl)-glycero-3-phosphate	212.195	224.451	179.255	170.083	174.525	178.774	126.086	112.366	119.033	105.095	94.5499	111.338	189.881	111.411	0.586744	-0.769197	0.000103291	2.13521	down	--	--	LMGP10050029	Glycerophospholipids [GP]	Glycerophosphates [GP10]	Monoacylglycerophosphates [GP1005]	HMDB0062304	--	Organic compounds	Lipids and lipid-like molecules	Glycerophospholipids	--	Animals
pos_4864	Behenic acid	128.893	125.2	104.475	103.69	116.076	117.883	155.864	124.592	131.932	138.858	122.312	133.614	116.036	134.529	1.15937	0.213338	0.0177966	1.61122	up	C08281	Cutin, suberine and wax biosynthesis(ko00073);;Biosynthesis of unsaturated fatty acids(ko01040)	LMFA01010022	Fatty Acyls [FA]	Fatty Acids and Conjugates [FA01]	Straight chain fatty acids [FA0101]	HMDB0000944	112-85-6	Organic compounds	Lipids and lipid-like molecules	Fatty Acyls	--	Animals,Plants
pos_4873	N-Arachidonoyl Histidine	32.9345	28.831	33.1258	31.0571	27.3145	24.9472	39.626	42.6036	48.2777	34.9349	45.3566	43.5149	29.7017	42.3856	1.42705	0.513031	0.000399588	1.98021	up	--	--	--	--	--	--	HMDB0241996	--	Organic compounds	Organic acids and derivatives	Carboxylic acids and derivatives	--	Animals
pos_4883	Indolylacryloylglycine	87.8596	114.408	131.813	124.263	132.278	130.718	132.5	130.486	150.958	138.221	142.95	141.202	120.223	139.386	1.1594	0.213373	0.0420412	1.42037	up	--	--	--	--	--	--	HMDB0006005	3475-68-1	Organic compounds	Organic acids and derivatives	Carboxylic acids and derivatives	--	Animals
pos_490	Tromethamine	1278.42	1395.22	1481.24	1302.55	1417.46	1335.15	1590.2	1485.01	1513.2	1463.13	1410.01	1377.37	1368.34	1473.15	1.0766	0.106481	0.0385073	1.43921	up	C07182	--	--	--	--	--	HMDB0240288	77-86-1	Organic compounds	Organic nitrogen compounds	Organonitrogen compounds	--	Animals
pos_491	Acetylhomoserine	812.767	761.208	947.957	826.714	825.745	756.646	1019.28	1047.22	1069.61	922.438	877.298	802.861	821.839	956.451	1.16379	0.218834	0.0294025	1.51572	up	--	--	--	--	--	--	HMDB0029423	7540-67-2	Organic compounds	Organic acids and derivatives	Carboxylic acids and derivatives	--	Animals
pos_4918	alpha-Crocetin glucosyl ester	235.558	184.29	171.498	168.222	153.029	131.879	171.052	129.18	155.555	112.253	99.8904	84.9205	174.079	125.475	0.720793	-0.472342	0.0331936	1.38448	down	--	--	--	--	--	--	HMDB0039120	58050-17-2	Organic compounds	Lipids and lipid-like molecules	Prenol lipids	--	Animals
pos_4960	5-(3-Methyl-5-pentylfuran-2-yl)pentanoylcarnitine	51.651	62.3431	65.2846	54.6395	57.2016	48.8434	81.6231	75.9137	96.4252	81.3416	86.0658	94.4152	56.6605	85.9641	1.51718	0.60139	4.7e-05	2.07906	up	--	--	--	--	--	--	HMDB0241846	--	Organic compounds	Lipids and lipid-like molecules	Fatty Acyls	--	Animals
pos_4979	Tetracosanoic acid	20.0175	49.2435	34.5646	31.8812	43.0197	34.5694	163.39	162.213	154.75	162.071	150.239	174.065	35.5493	161.122	4.53234	2.18025	7.1e-10	2.30231	up	C08320	Biosynthesis of unsaturated fatty acids(ko01040)	LMFA01010024	Fatty Acyls [FA]	Fatty Acids and Conjugates [FA01]	Straight chain fatty acids [FA0101]	HMDB0002003	557-59-5	Organic compounds	Lipids and lipid-like molecules	Fatty Acyls	--	Microbe,Animals,Plants
pos_4984	Phorbol myristate	104.979	89.2046	132.191	147.231	129.702	139.193	175.064	154.411	156.209	157.637	158.355	111.907	123.75	152.264	1.23041	0.299143	0.0455494	1.42907	up	--	--	--	--	--	--	HMDB0256455	--	Organic compounds	Lipids and lipid-like molecules	Prenol lipids	--	Animals
pos_5003	Tryptophyl-Lysine	10.222	42.4022	35.0693	20.5454	22.8407	29.0238	37.9169	50.6103	68.8056	67.321	51.5595	72.3108	26.6839	58.0874	2.17687	1.12225	0.00151071	1.83127	up	--	--	--	--	--	--	HMDB0029088	--	Organic compounds	Organic acids and derivatives	Carboxylic acids and derivatives	--	Animals
pos_5009	LysoPE(20:1(11Z)/0:0)	1070.96	898.446	1365.61	1484.36	1333.34	1402.9	1675.45	1636.6	1764.24	1694.02	1567.13	1140.03	1259.27	1579.58	1.25436	0.326953	0.0334156	1.48537	up	--	--	LMGP02050020	Glycerophospholipids [GP]	Glycerophosphoethanolamines [GP02]	Monoacylglycerophosphoethanolamines [GP0205]	HMDB0011512	--	Organic compounds	Lipids and lipid-like molecules	Glycerophospholipids	--	Animals
pos_5010	N-[(Z)-1,3-Dihydroxyoctadec-4-en-2-yl]-6-[(4-nitro-2,1,3-benzoxadiazol-7-yl)amino]hexanamide	164.778	157.369	213.476	213.644	200.205	212.431	269.032	271.506	283.469	280.212	278.901	185.086	193.651	261.368	1.34969	0.432624	0.00569739	1.79539	up	--	--	--	--	--	--	HMDB0247534	--	Organic compounds	Lipids and lipid-like molecules	Sphingolipids	--	Animals
pos_5050	PC(0:0/18:0)	7867.47	10329.8	9116.35	8110.81	7780.65	7957.16	7504.26	7382.28	7418.16	6558.95	6516.86	6476.11	8527.05	6976.1	0.818115	-0.289625	0.0111017	1.67893	down	--	--	LMGP01050076	Glycerophospholipids [GP]	Glycerophosphocholines [GP01]	Monoacylglycerophosphocholines [GP0105]	HMDB0011128	4421-58-3	Organic compounds	Lipids and lipid-like molecules	Glycerophospholipids	--	Animals
pos_5051	2-[[3-(Decanoylamino)-2-decoxy-propoxy]-hydroxy-phosphoryl]oxyethyl-trimethyl-ammonium	256.022	350.283	307.159	293.987	329.379	317.699	379.325	372.831	393.527	363.46	375.493	364.512	309.088	374.858	1.21279	0.278325	0.00307157	1.94732	up	--	--	--	--	--	--	HMDB0247835	--	Organic compounds	Organic nitrogen compounds	Organonitrogen compounds	--	Animals
pos_5070	14alpha-Hydroxy-4beta-deoxypaxilline	40.7491	61.0704	40.0837	41.892	52.1463	38.5111	40.6889	65.3981	73.6971	51.6897	63.1682	64.3866	45.7421	59.8381	1.30816	0.387541	0.0429666	1.33961	up	--	--	--	--	--	--	HMDB0040979	157530-29-5	Organic compounds	Organoheterocyclic compounds	Naphthopyrans	--	Animals
pos_5075	cis-Uvariamicin IB	312.678	479.649	455.893	430.831	430.12	421.589	2.51438	7.89e-08	1.52591	7.21e-08	7.12e-08	3.45072	421.793	1.2485	0.00295998	-8.40019	9.91e-06	2.29113	down	--	--	--	--	--	--	HMDB0032714	--	Organic compounds	Lipids and lipid-like molecules	Fatty Acyls	--	Animals
pos_5092	MG(19:0/0:0/0:0)	118.364	157.277	156.787	148.53	150.198	139.618	164.299	165.426	160.666	152.656	172.767	157.41	145.129	162.204	1.11766	0.160476	0.0355693	1.46115	up	--	--	--	--	--	--	HMDB0072839	--	Organic compounds	Lipids and lipid-like molecules	Glycerolipids	--	Animals
pos_5097	15-Octadecene-9,11,13-triynoic acid	36.1818	26.5884	58.3705	51.5096	51.6429	62.0925	86.5393	72.3881	76.0924	78.9554	85.0729	51.6297	47.7309	75.113	1.57367	0.654137	0.00487329	1.78882	up	--	--	LMFA01030559	Fatty Acyls [FA]	Fatty Acids and Conjugates [FA01]	Unsaturated fatty acids [FA0103]	--	--	--	--	--	--	--
pos_5202	Gly Arg Pro Arg	429.386	541.503	453.532	413.33	410.79	427.353	313.078	294.227	278.71	256.108	264.828	264.118	445.983	278.511	0.62449	-0.679251	0.000136141	2.13485	down	--	--	--	--	--	--	--	--	--	--	--	--	--
pos_5205	Chenodeoxycholylisoleucine	20.2031	46.6892	35.1954	50.3158	40.6706	50.4145	20.9324	15.0432	21.4831	36.1275	28.2352	30.2956	40.5814	25.3528	0.62474	-0.678672	0.0257806	1.5134	down	--	--	--	--	--	--	HMDB0242394	--	_	_	_	--	Animals
pos_5212	Sorbitan oleate	347.414	540.779	582.378	571.849	536.501	589.933	754.054	781.073	770.153	772.377	697.209	648.062	528.142	737.155	1.39575	0.48104	0.00124927	1.97707	up	--	--	LMFA07011018	Fatty Acyls [FA]	Fatty esters [FA07]	Wax monoesters [FA0701]	HMDB0029886	1338-43-8	Organic compounds	Lipids and lipid-like molecules	Fatty Acyls	--	Animals
pos_5307	alpha-Tocopherolquinone	189.818	189.399	247.496	177.108	188.929	151.677	161.234	150.164	123.21	134.232	139.519	181.809	190.738	148.361	0.777829	-0.362475	0.0232404	1.59046	down	--	--	--	--	--	--	HMDB0034408	7559-04-08	Organic compounds	Lipids and lipid-like molecules	Prenol lipids	--	Animals
pos_535	19-Hydroxydeacetylnomilinic acid 17-beta-D-glucopyranoside	57.4028	62.6032	66.1559	58.077	60.6945	63.302	53.4761	52.0994	57.9563	59.9801	49.9969	51.9644	61.3726	54.2455	0.883872	-0.17809	0.00677098	1.70962	down	--	--	--	--	--	--	HMDB0037589	--	Organic compounds	Lipids and lipid-like molecules	Saccharolipids	--	Animals
pos_5367	Palmitic amide	24154.9	25017	23516.9	19081.2	18099.5	17386.9	30081.1	27978.1	25788.6	23394.6	23957.9	25774	21209.4	26162.4	1.23353	0.30279	0.0177682	1.57661	up	--	--	LMFA08010009	Fatty Acyls [FA]	Fatty amides [FA08]	Primary amides [FA0801]	HMDB0012273	629-54-9	Organic compounds	Lipids and lipid-like molecules	Fatty Acyls	--	Animals,Plants
pos_5371	5-Hydroxylysinonorleucine	169.042	163.271	125.603	113.383	95.4951	91.3793	224.214	175.734	146.297	157.787	176.145	207.406	126.362	181.264	1.43448	0.520526	0.0130019	1.60204	up	--	--	--	--	--	--	HMDB0246805	--	Organic compounds	Organic acids and derivatives	Carboxylic acids and derivatives	--	Animals
pos_5432	Spirotaccagenin	1180.3	1455.25	1348.99	1274.02	1174.09	1191.3	2012.11	2041.68	2045.75	1865.36	1835.44	1888.1	1270.66	1948.07	1.53312	0.61647	7.07e-07	2.2456	up	--	--	--	--	--	--	HMDB0034424	--	Organic compounds	Lipids and lipid-like molecules	Prenol lipids	--	Animals
pos_5433	N-Arachidonoyl Threonine	365.837	487.515	543.115	792.661	797.788	810.925	826.786	909.418	859.513	973.099	931.498	900.245	632.973	900.093	1.42201	0.50793	0.0179103	1.69022	up	--	--	--	--	--	--	HMDB0242004	--	Organic compounds	Organic acids and derivatives	Carboxylic acids and derivatives	--	Animals
pos_5435	7',8'-Dihydro-8'-hydroxycitraniaxanthin	93.5342	80.4368	66.5937	90.9433	91.2009	93.1156	94.6406	109.762	98.2847	134.402	154.622	179.827	85.9708	128.59	1.49574	0.580857	0.0262744	1.51226	up	--	--	--	--	--	--	HMDB0036884	15446-86-3	Organic compounds	Lipids and lipid-like molecules	Prenol lipids	--	Animals
pos_5436	(16Z)-14-Hydroxydocos-16-enoylcarnitine	44.3378	72.7141	46.837	61.7186	48.7112	40.07	71.5436	77.8376	66.2558	79.6319	76.3955	86.6167	52.3981	76.3802	1.45769	0.543684	0.0033216	1.81945	up	--	--	--	--	--	--	HMDB0241603	--	Organic compounds	Lipids and lipid-like molecules	Fatty Acyls	--	Animals
pos_5450	1,6-Dimethylnaphthalene	13.684	21.3443	14.632	16.1694	15.7988	16.8794	24.2242	20.4805	25.8051	15.4896	17.705	21.5573	16.418	20.877	1.27159	0.346634	0.0458706	1.41933	up	--	--	--	--	--	--	--	--	--	--	--	--	--
pos_5455	[3-[(2R,6S)-2,6-Dimethylpiperidin-1-yl]-4H-oxadiazol-3-ium-5-ylidene]azanide	1.16425	0.946125	6.80621	1.95489	1.70951	5.04146	6.47978	10.4612	14.1567	17.3058	7.67473	8.15971	2.93707	10.7063	3.64524	1.86601	0.00450169	1.79402	up	--	--	--	--	--	--	HMDB0249694	--	Organic compounds	Organoheterocyclic compounds	Piperidines	--	Animals
pos_5486	Pregabalin	54.9469	51.725	38.672	37.4046	31.7295	30.4467	80.8891	66.9655	63.4867	51.5976	57.8508	61.5876	40.8208	63.7296	1.5612	0.64266	0.00279918	1.8436	up	--	--	--	--	--	--	HMDB0245784	148553-50-8	Organic compounds	Organic acids and derivatives	Carboxylic acids and derivatives	--	Animals
pos_571	Lamivudine-monophosphate	138.039	169.927	160.221	166.83	171.608	182.941	185.212	185.282	177.201	193.699	168.229	183.119	164.928	182.124	1.10426	0.143086	0.0420581	1.45516	up	--	--	--	--	--	--	HMDB0060641	--	Organic compounds	Nucleosides, nucleotides, and analogues	Nucleoside and nucleotide analogues	--	Animals
pos_604	(R)-Cryptone	324.072	337.365	277.382	202.056	194.438	200.351	406.991	341.987	321.036	315.011	306.981	359.987	255.944	341.999	1.33623	0.418164	0.0236195	1.5408	up	--	--	--	--	--	--	HMDB0035929	2158-61-4	Organic compounds	Organic oxygen compounds	Organooxygen compounds	--	Animals
pos_606	Undecylenic acid	258.616	270.21	190.864	168.496	130.277	133.717	343.689	307.26	281.619	237.227	250.953	307.027	192.03	287.962	1.49957	0.58455	0.0105975	1.67485	up	C13910	--	LMFA01030036	Fatty Acyls [FA]	Fatty Acids and Conjugates [FA01]	Unsaturated fatty acids [FA0103]	HMDB0033724	112-38-9	Organic compounds	Lipids and lipid-like molecules	Fatty Acyls	--	Animals
pos_608	2-Cyclotetradecen-1-one	387.1	382.794	358.082	300.968	288.243	279.93	519.907	463.107	442.375	392.088	407.33	444.554	332.853	444.894	1.33661	0.418576	0.00206037	1.86231	up	--	--	--	--	--	--	HMDB0039884	55395-12-5	Organic compounds	Organic oxygen compounds	Organooxygen compounds	--	Animals
pos_609	2,6,10,10-Tetramethyl-1-oxaspiro[4.5]decan-6-ol	223.259	215.473	167.572	138.137	130.852	121.616	324.805	271.393	246.562	216.801	205.213	258.8	166.151	253.929	1.5283	0.611926	0.00573307	1.75119	up	--	--	--	--	--	--	HMDB0037907	53398-90-6	Organic compounds	Organoheterocyclic compounds	Tetrahydrofurans	--	Animals
pos_610	9,12,15-Octadecatrien-1-ol	68327.1	67493.2	55883.4	43837.3	40551.5	39649.9	98369.1	87330.8	78725.7	72280.3	72701.1	83641.5	52623.7	82174.7	1.56155	0.642981	0.00162499	1.89876	up	--	--	LMFA05000216	Fatty Acyls [FA]	Fatty alcohols [FA05]	-	--	--	--	--	--	--	--
pos_616	3-Heptadeca-1,3-dienyloxirene-2-carboxylic acid	801.41	969.612	1035.64	933.348	932.551	941.363	1325.14	1363.03	1409.95	1283.23	1198.37	1128.93	935.655	1284.77	1.37313	0.457467	9.46e-05	2.12151	up	--	--	--	--	--	--	HMDB0257627	--	Organic compounds	Organoheterocyclic compounds	Oxirenes	--	Animals
pos_620	Fusidic Acid	21.4635	18.8906	47.408	29.2223	47.8154	45.5648	54.9925	48.1139	54.7814	75.1768	58.5457	45.2835	35.0608	56.149	1.60148	0.679403	0.0136402	1.6074	up	C06694	--	LMPR0106040001	Prenol Lipids [PR]	Isoprenoids [PR01]	C30 isoprenoids (triterpenes) [PR0106]	HMDB0015570	6990-06-03	Organic compounds	Lipids and lipid-like molecules	Steroids and steroid derivatives	--	Animals
pos_621	Oleamide	107.993	87.6792	45.222	45.6032	24.2009	18.5667	202.663	139.951	123.186	106.465	117.076	161.293	54.8776	141.773	2.58343	1.36929	0.0017301	1.87862	up	C19670	--	LMFA08010004	Fatty Acyls [FA]	Fatty amides [FA08]	Primary amides [FA0801]	HMDB0002117	301-02-0	Organic compounds	Lipids and lipid-like molecules	Fatty Acyls	--	Animals,Plants
pos_653	Lycaconitine	997.331	1025.58	906.719	868.236	923.799	856.537	1680.51	2062.6	1572.08	1598.62	1489.25	908.408	929.699	1551.91	1.66926	0.73921	0.0089306	1.88595	up	--	--	--	--	--	--	--	--	--	--	--	--	--
pos_656	PE(18:4(6Z,9Z,12Z,15Z)/18:4(6Z,9Z,12Z,15Z))	818.226	867.324	891.379	831.703	891.809	782.909	1414.05	1694.42	1489.01	1421.34	1348.13	794.363	847.225	1360.22	1.6055	0.683022	0.0083964	1.89696	up	--	--	LMGP02010754	Glycerophospholipids [GP]	Glycerophosphoethanolamines [GP02]	Diacylglycerophosphoethanolamines [GP0201]	HMDB0009195	--	Organic compounds	Lipids and lipid-like molecules	Glycerophospholipids	--	Animals
pos_657	PI(18:1(11Z)/20:3(5Z,8Z,11Z)-O(14R,15S))	292.506	229.449	181.509	120.161	112.824	134.879	435.643	264.921	248.442	223.147	296.999	356.614	178.555	304.294	1.70421	0.769101	0.0160986	1.57873	up	--	--	--	--	--	--	HMDB0276440	--	_	_	_	--	Animals
pos_740	N-Myristoyl Tryptophan	7.38709	14.759	6.27094	12.1777	4.3483	10.9788	4.9431	1.89249	2.9969	6.48171	1.57196	5.30124	9.32031	3.86457	0.414639	-1.27007	0.0182842	1.58437	down	--	--	--	--	--	--	HMDB0242061	--	_	_	_	--	Animals
pos_758	PC(P-18:0/18:3(10,12,15)-OH(9))	83578.4	85746.6	85780.8	90855.9	89815.8	96970.3	90508.7	90356.1	102439	104147	101074	94281.5	88791.3	97134.5	1.09396	0.129565	0.0275476	1.47412	up	--	--	--	--	--	--	HMDB0289617	--	_	_	_	--	Animals
pos_871	Abametapir	14.1942	32.944	24.3311	20.3173	25.1994	11.2913	40.8705	35.848	30.1407	21.9475	26.9464	29.4869	21.3796	30.8733	1.44406	0.530129	0.0488362	1.37305	up	--	--	--	--	--	--	HMDB0246854	1762-34-1	Organic compounds	Organoheterocyclic compounds	Pyridines and derivatives	--	Animals
