# Supplementary material for: Transcriptome and Metabolome Analyses Provide Insight into the Glucose-Induced Adipogenesis in Porcine Adipocytes
Source: Curr Issues Mol Biol. 2024 Mar 3;46(3):2027–42. doi: 10.3390/cimb46030131 (PMC10968871; doi:10.3390/cimb46030131)
Supplement: Supplementary file 1 [file cimb-46-00131-s001.zip › Table S7. KEGG annotated results of differential metabolites.xlsx]

## Sheet: Sheet1
Table S7. KEGG annotated results of differential metabolites
Pathway	ko_ID	Diff_Metabolites_in_Pathway	All_metabolites_in_Pathway	Diff_Mtabolites_in_All_pathways	All_Metabolites_in_All_pathways	Metabolite_id	KEGG_Orthology
Phenylalanine metabolism	ko00360	1	2	21	120	pos_2506	C00079
Linoleic acid metabolism	ko00591	1	4	21	120	neg_4355	C14762
Glucosinolate biosynthesis	ko00966	1	2	21	120	pos_2506	C00079
Benzoxazinoid biosynthesis	ko00402	1	1	21	120	pos_3571	C03506
Xylene degradation	ko00622	1	2	21	120	pos_4195	C07212
Indole diterpene alkaloid biosynthesis	ko00403	1	2	21	120	pos_3571	C03506
Vitamin B6 metabolism	ko00750	1	3	21	120	pos_2997	C00647
Biosynthesis of unsaturated fatty acids	ko01040	3	6	21	120	pos_4979;pos_4864;pos_4484	C08320+C08281+C16513
Purine metabolism	ko00230	2	3	21	120	pos_439;pos_3018	C04823+C03838
Biosynthesis of various other secondary metabolites	ko00997	1	4	21	120	pos_2506	C00079
Pantothenate and CoA biosynthesis	ko00770	1	3	21	120	neg_2911	C00864
Pentose and glucuronate interconversions	ko00040	1	1	21	120	pos_1398	C00474
Chlorocyclohexane and chlorobenzene degradation	ko00361	1	1	21	120	pos_2766	C15584
Biosynthesis of various alkaloids	ko00996	1	3	21	120	pos_2506	C00079
Biosynthesis of alkaloids derived from ornithine, lysine and nicotinic acid	ko01064	1	4	21	120	pos_2506	C00079
Cutin, suberine and wax biosynthesis	ko00073	1	3	21	120	pos_4864	C08281
beta-Alanine metabolism	ko00410	2	3	21	120	neg_2911;pos_2907	C00864+C01262
Aminobenzoate degradation	ko00627	1	2	21	120	pos_2766	C15584
Tryptophan metabolism	ko00380	1	7	21	120	pos_2757	C05647
Biosynthesis of plant secondary metabolites	ko01060	1	10	21	120	pos_2506	C00079
Biosynthesis of plant hormones	ko01070	1	7	21	120	pos_2506	C00079
Biosynthesis of phenylpropanoids	ko01061	1	8	21	120	pos_2506	C00079
Riboflavin metabolism	ko00740	1	2	21	120	pos_1398	C00474
Biosynthesis of alkaloids derived from shikimate pathway	ko01063	2	7	21	120	pos_3571;pos_2506	C03506+C00079
Mineral absorption	ko04978	1	2	21	120	pos_2506	C00079
Aminoacyl-tRNA biosynthesis	ko00970	1	2	21	120	pos_2506	C00079
Pyrimidine metabolism	ko00240	1	4	21	120	neg_3837	C00475
Vitamin digestion and absorption	ko04977	2	2	21	120	neg_2911;pos_2997	C00864+C00647
Benzoate degradation	ko00362	1	2	21	120	pos_2766	C15584
D-Amino acid metabolism	ko00470	1	2	21	120	pos_2506	C00079
Protein digestion and absorption	ko04974	2	4	21	120	pos_2506;pos_2766	C00079+C15584
Bile secretion	ko04976	1	2	21	120	neg_3998	C03642
Phenylpropanoid biosynthesis	ko00940	1	5	21	120	pos_2506	C00079
Histidine metabolism	ko00340	1	3	21	120	pos_2907	C01262
Chemical carcinogenesis - reactive oxygen species	ko05208	1	5	21	120	pos_2766	C15584
Phenylalanine, tyrosine and tryptophan biosynthesis	ko00400	3	6	21	120	pos_3000;pos_2506;pos_3571	C00296+C00079+C03506
Folate biosynthesis	ko00790	1	3	21	120	neg_3824	C05925
Tropane, piperidine and pyridine alkaloid biosynthesis	ko00960	1	1	21	120	pos_2506	C00079
Tyrosine metabolism	ko00350	1	1	21	120	pos_2766	C15584
Biosynthesis of various plant secondary metabolites	ko00999	1	6	21	120	pos_2506	C00079
ABC transporters	ko02010	2	6	21	120	neg_3837;pos_2506	C00475+C00079
Cyanoamino acid metabolism	ko00460	2	2	21	120	pos_2739;pos_2506	C06114+C00079
Central carbon metabolism in cancer	ko05230	1	6	21	120	pos_2506	C00079
PPAR signaling pathway	ko03320	1	2	21	120	neg_4355	C14762
Drug metabolism - cytochrome P450	ko00982	1	2	21	120	neg_1801	C16560
