# Supplementary material for: Transcriptome and Metabolome Analyses Provide Insight into the Glucose-Induced Adipogenesis in Porcine Adipocytes
Source: Curr Issues Mol Biol. 2024 Mar 3;46(3):2027–42. doi: 10.3390/cimb46030131 (PMC10968871; doi:10.3390/cimb46030131)
Supplement: Supplementary file 1 [file cimb-46-00131-s001.zip › Table S8. The differential metabolites and genes related top 20 of the enriched KEGG pathways.xlsx]

## Sheet: Sheet1
Table S8. The differential metabolites and genes related top 20 of the enriched KEGG pathways
ID	Description	MetaboliteRatio	BgRatio	enrich_factor	pvalue	qvalue	metaboliteID
ko00460	Cyanoamino acid metabolism	0.0952	0.0167	5.71	0.0294118	0.554864	pos_2506;pos_2739
ko04977	Vitamin digestion and absorption	0.0952	0.0167	5.71	0.0294118	0.554864	neg_2911;pos_2997
ko00400	Phenylalanine, tyrosine and tryptophan biosynthesis	0.1429	0.05	2.86	0.0656249	0.554864	pos_2506;pos_3000;pos_3571
ko01040	Biosynthesis of unsaturated fatty acids	0.1429	0.05	2.86	0.0656249	0.554864	pos_4484;pos_4864;pos_4979
ko00230	Purine metabolism	0.0952	0.025	3.81	0.0787637	0.554864	pos_3018;pos_439
ko00410	beta-Alanine metabolism	0.0952	0.025	3.81	0.0787637	0.554864	neg_2911;pos_2907
ko04974	Protein digestion and absorption	0.0952	0.0333	2.86	0.14077	0.554864	pos_2506;pos_2766
ko00040	Pentose and glucuronate interconversions	0.0476	0.0083	5.71	0.175	0.554864	pos_1398
ko00350	Tyrosine metabolism	0.0476	0.0083	5.71	0.175	0.554864	pos_2766
ko00361	Chlorocyclohexane and chlorobenzene degradation	0.0476	0.0083	5.71	0.175	0.554864	pos_2766
ko00402	Benzoxazinoid biosynthesis	0.0476	0.0083	5.71	0.175	0.554864	pos_3571
ko00960	Tropane, piperidine and pyridine alkaloid biosynthesis	0.0476	0.0083	5.71	0.175	0.554864	pos_2506
ko02010	ABC transporters	0.0952	0.05	1.9	0.282043	0.554864	neg_3837;pos_2506
ko00360	Phenylalanine metabolism	0.0476	0.0167	2.86	0.320588	0.554864	pos_2506
ko00362	Benzoate degradation	0.0476	0.0167	2.86	0.320588	0.554864	pos_2766
ko00403	Indole diterpene alkaloid biosynthesis	0.0476	0.0167	2.86	0.320588	0.554864	pos_3571
ko00470	D-Amino acid metabolism	0.0476	0.0167	2.86	0.320588	0.554864	pos_2506
ko00622	Xylene degradation	0.0476	0.0167	2.86	0.320588	0.554864	pos_4195
ko00627	Aminobenzoate degradation	0.0476	0.0167	2.86	0.320588	0.554864	pos_2766
ko00740	Riboflavin metabolism	0.0476	0.0167	2.86	0.320588	0.554864	pos_1398
ko00966	Glucosinolate biosynthesis	0.0476	0.0167	2.86	0.320588	0.554864	pos_2506
ko00970	Aminoacyl-tRNA biosynthesis	0.0476	0.0167	2.86	0.320588	0.554864	pos_2506
ko00982	Drug metabolism - cytochrome P450	0.0476	0.0167	2.86	0.320588	0.554864	neg_1801
ko03320	PPAR signaling pathway	0.0476	0.0167	2.86	0.320588	0.554864	neg_4355
ko04976	Bile secretion	0.0476	0.0167	2.86	0.320588	0.554864	neg_3998
ko04978	Mineral absorption	0.0476	0.0167	2.86	0.320588	0.554864	pos_2506
ko01063	Biosynthesis of alkaloids derived from shikimate pathway	0.0952	0.0583	1.63	0.354182	0.590303	pos_2506;pos_3571
ko00073	Cutin, suberine and wax biosynthesis	0.0476	0.025	1.9	0.4415	0.602046	pos_4864
ko00340	Histidine metabolism	0.0476	0.025	1.9	0.4415	0.602046	pos_2907
ko00750	Vitamin B6 metabolism	0.0476	0.025	1.9	0.4415	0.602046	pos_2997
ko00770	Pantothenate and CoA biosynthesis	0.0476	0.025	1.9	0.4415	0.602046	neg_2911
ko00790	Folate biosynthesis	0.0476	0.025	1.9	0.4415	0.602046	neg_3824
ko00996	Biosynthesis of various alkaloids	0.0476	0.025	1.9	0.4415	0.602046	pos_2506
ko00240	Pyrimidine metabolism	0.0476	0.0333	1.43	0.541744	0.658878	neg_3837
ko00591	Linoleic acid metabolism	0.0476	0.0333	1.43	0.541744	0.658878	neg_4355
ko00997	Biosynthesis of various other secondary metabolites	0.0476	0.0333	1.43	0.541744	0.658878	pos_2506
ko01064	Biosynthesis of alkaloids derived from ornithine, lysine and nicotinic acid	0.0476	0.0333	1.43	0.541744	0.658878	pos_2506
ko00940	Phenylpropanoid biosynthesis	0.0476	0.0417	1.14	0.624704	0.720812	pos_2506
ko05208	Chemical carcinogenesis - reactive oxygen species	0.0476	0.0417	1.14	0.624704	0.720812	pos_2766
ko00999	Biosynthesis of various plant secondary metabolites	0.0476	0.05	0.95	0.693236	0.760869	pos_2506
ko05230	Central carbon metabolism in cancer	0.0476	0.05	0.95	0.693236	0.760869	pos_2506
ko00380	Tryptophan metabolism	0.0476	0.0583	0.82	0.749746	0.784617	pos_2757
ko01070	Biosynthesis of plant hormones	0.0476	0.0583	0.82	0.749746	0.784617	pos_2506
ko01061	Biosynthesis of phenylpropanoids	0.0476	0.0667	0.71	0.796253	0.81435	pos_2506
ko01060	Biosynthesis of plant secondary metabolites	0.0476	0.0833	0.57	0.865775	0.865775	pos_2506
